# Supplementary material for: Comprehensive Analysis of CircRNA Expression Profiles in Multiple Tissues of Pigs
Source: MDPI journal article supplement (doi:10.3390/ijms242216205), 2023-11-11
Supplement: s1 [file s1]

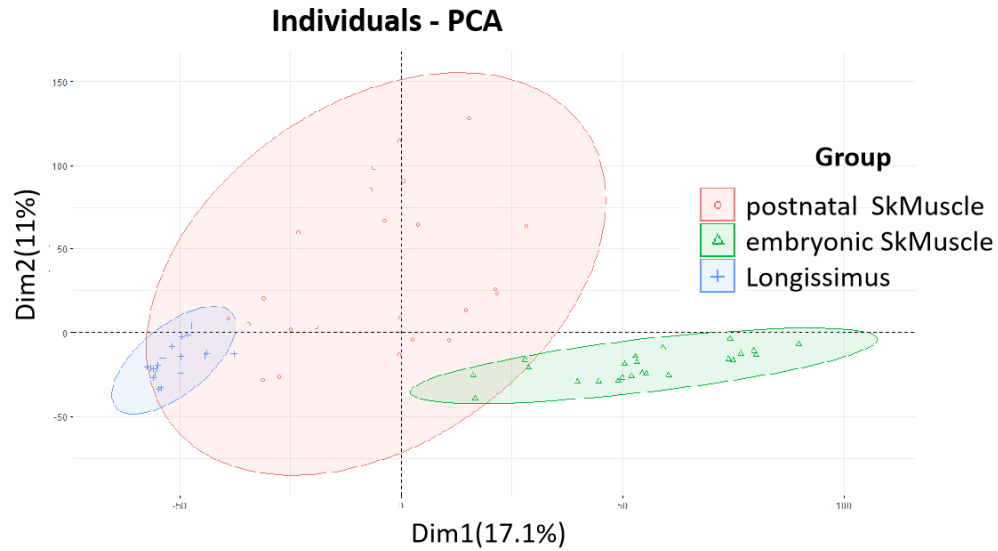

**Figure S1.** The PCA analyse among postnatal skeletal muscle, embryoic skeletal muscle and longissimus dorsi.

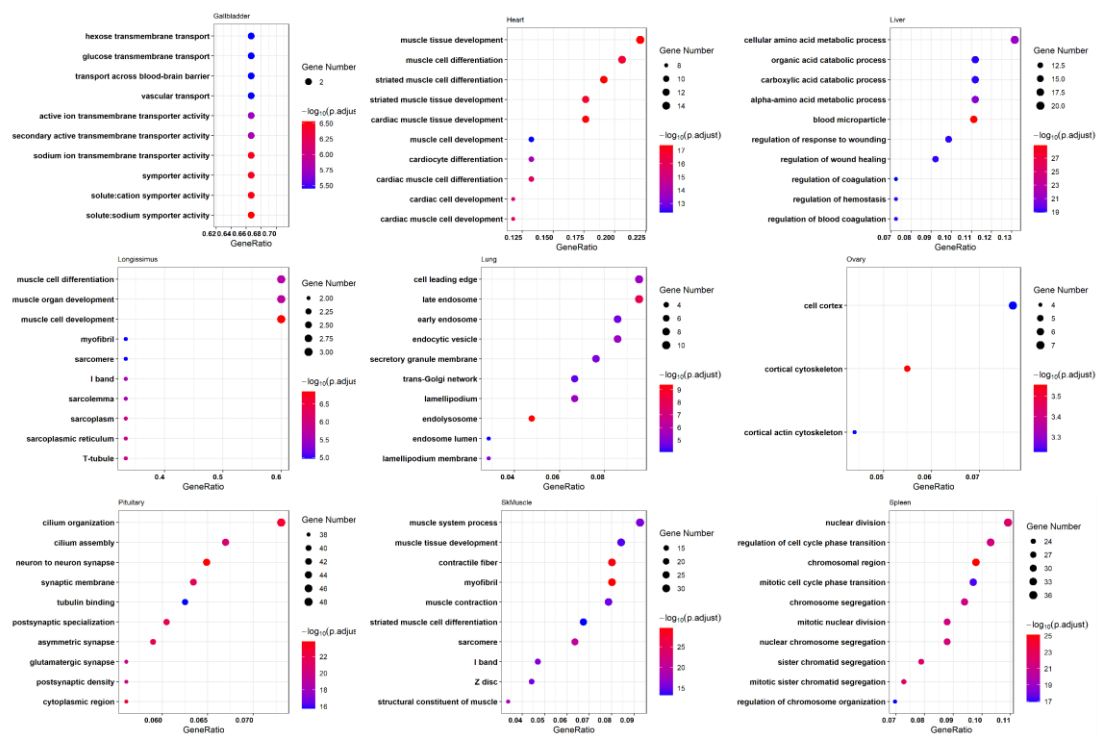

**Figure S2.** The GO analyse of tissue-specific circRNA's parental genes.

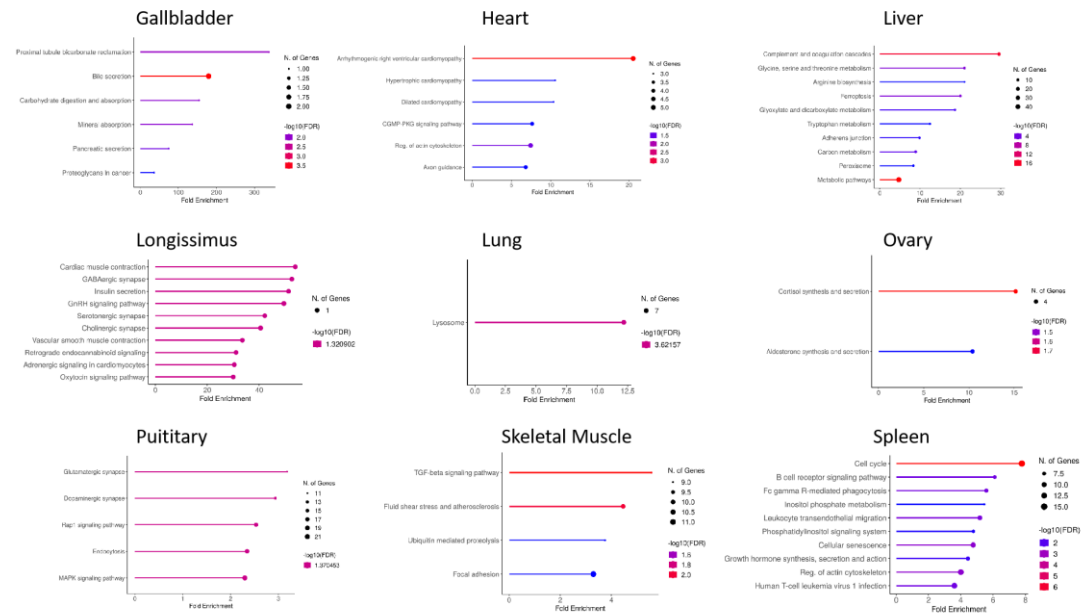

**Figure S3.** The KEGG analyse of tissue-specific circRNA's parental genes.

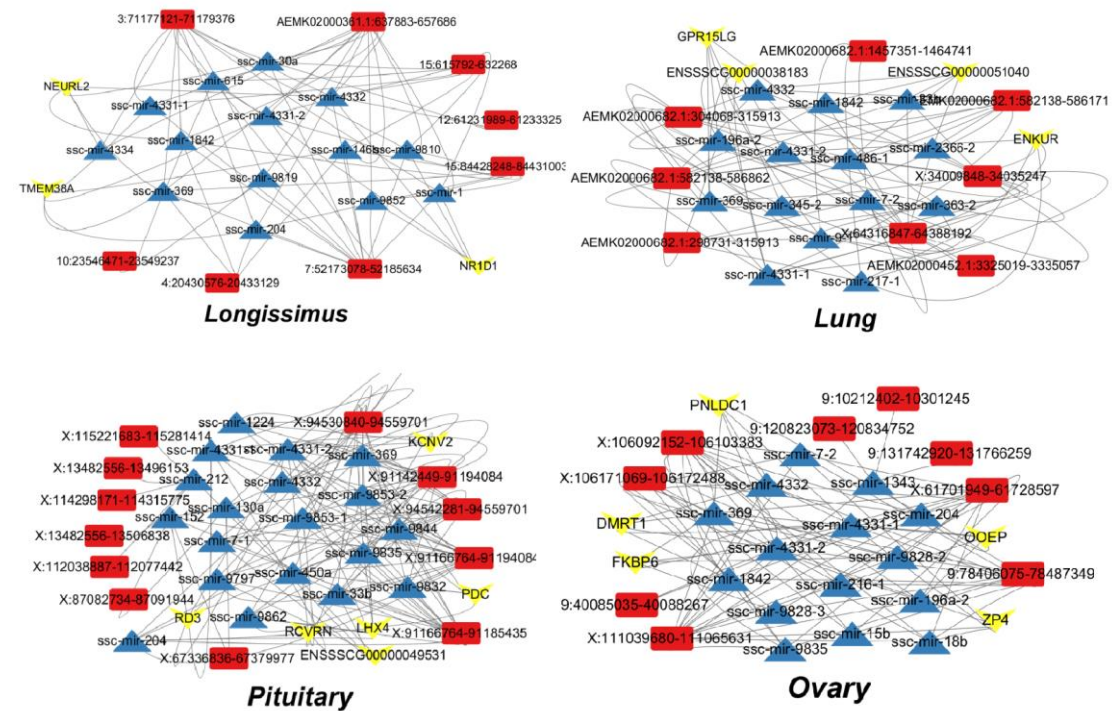

**Figure S4.** The ceRNA network between tissue-specific circRNAs and tissue-specific genes in longissimus dorsi, lung, pituitary and ovary.

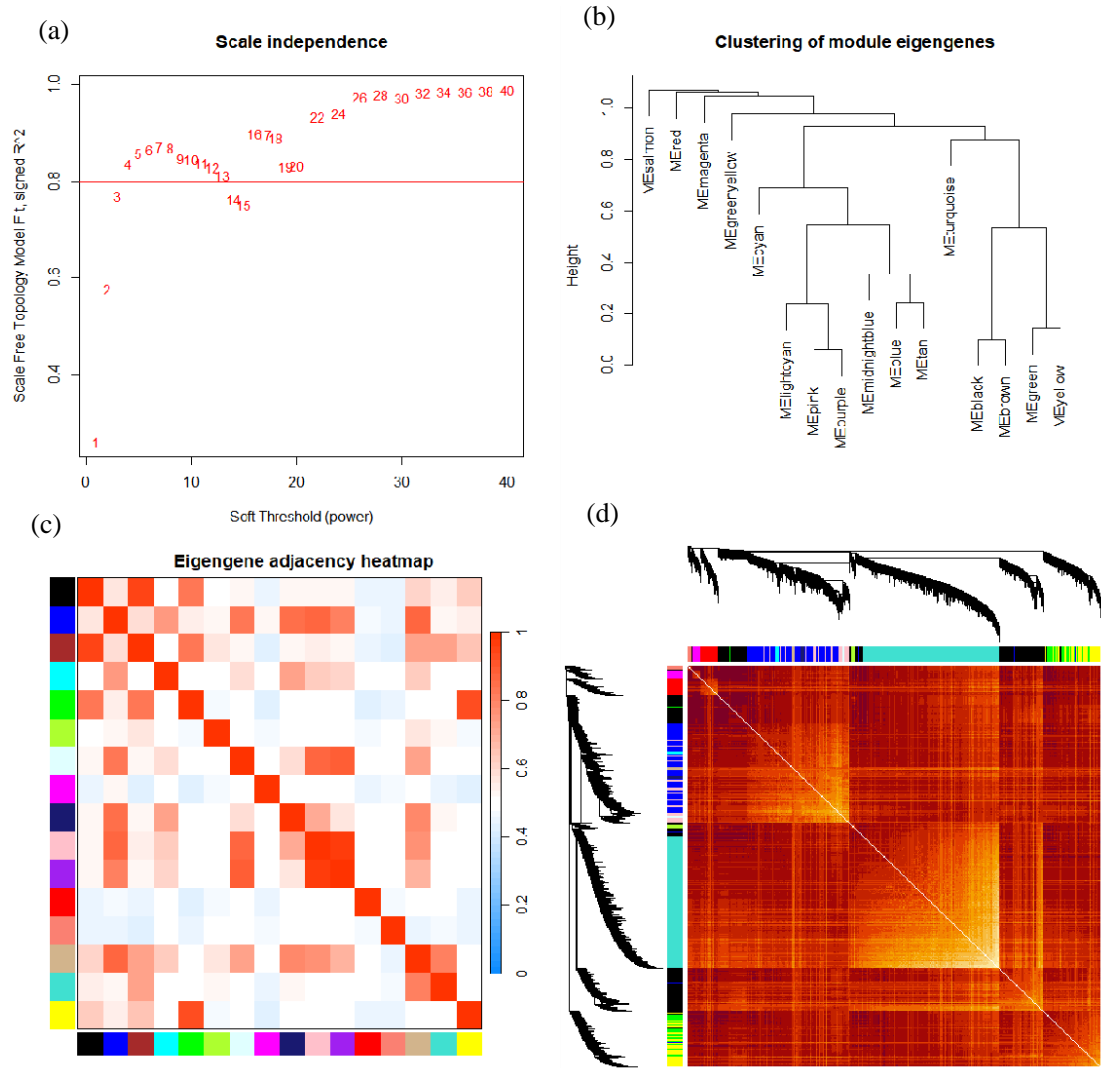

**Figure S5.** The weighted gene co-expression network analysis of circRNAs. (a) The determination of the soft threshold ( $\beta$ ). (b) The clustering relationship among modules. (c) The correlation among modules. (d) The correlation among circRNAs.

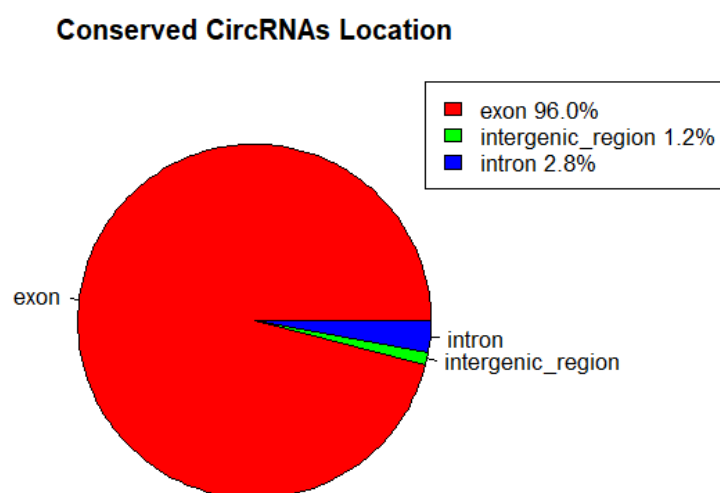

**Figure S6.** The location of conserved circRNAs between human and pigs
