# Supplementary material for: Comprehensive Analysis of CircRNA Expression Profiles in Multiple Tissues of Pigs
Source: Int J Mol Sci. 2023 Nov 11;24(22):16205. doi: 10.3390/ijms242216205 (PMC10671760; doi:10.3390/ijms242216205)
Supplement: Supplementary file 1 [file ijms-24-16205-s001.zip › Supplement Table.xlsx]

## Sheet: Table S1
Table S1. The summary of download RNA-seq
RUN	BioProject	Tissues type	ReleaseDate	Assay Type	BioSample	Bytes	Bases	tissue	Center Name	Consent	DATASTORE filetype	Experiment	Instrument	LibraryLayout	LibrarySelection	LibrarySource	Organism	Sample Name	SRA Study	AvgSpotLen	Bases	Library Name	BREED	sex	BioSampleModel	AGE
SRR13791122	PRJNA705170	Heart	2021-03-03T00:00:00Z	RNA-Seq	SAMN18071108	4961005589	11533175400	heart	GEO	public	fastq,sra	SRX10176147	Illumina HiSeq 4000	PAIRED	cDNA	TRANSCRIPTOMIC	Sus scrofa	GSM5111696	SRP308376	300	11533175400		Tibetan minipig
SRR13791123	PRJNA705170	Heart	2021-03-03T00:00:00Z	RNA-Seq	SAMN18071107	5812740665	13596712800	heart	GEO	public	fastq,sra	SRX10176148	Illumina HiSeq 4000	PAIRED	cDNA	TRANSCRIPTOMIC	Sus scrofa	GSM5111697	SRP308376	300	13596712800		Tibetan minipig
SRR13791124	PRJNA705170	Heart	2021-03-03T00:00:00Z	RNA-Seq	SAMN18071106	5670111868	13342815900	heart	GEO	public	sra,fastq	SRX10176149	Illumina HiSeq 4000	PAIRED	cDNA	TRANSCRIPTOMIC	Sus scrofa	GSM5111698	SRP308376	300	13342815900		Tibetan minipig
SRR13791125	PRJNA705170	Heart	2021-03-03T00:00:00Z	RNA-Seq	SAMN18071105	6088620917	14342858100	heart	GEO	public	sra,fastq	SRX10176150	Illumina HiSeq 4000	PAIRED	cDNA	TRANSCRIPTOMIC	Sus scrofa	GSM5111699	SRP308376	300	14342858100		Tibetan minipig
SRR13791126	PRJNA705170	Heart	2021-03-03T00:00:00Z	RNA-Seq	SAMN18071103	5506503710	13096705500	heart	GEO	public	fastq,sra	SRX10176151	Illumina HiSeq 4000	PAIRED	cDNA	TRANSCRIPTOMIC	Sus scrofa	GSM5111700	SRP308376	300	13096705500		Tibetan minipig
SRR13791127	PRJNA705170	Heart	2021-03-03T00:00:00Z	RNA-Seq	SAMN18071102	5703735859	13531649100	heart	GEO	public	fastq,sra	SRX10176152	Illumina HiSeq 4000	PAIRED	cDNA	TRANSCRIPTOMIC	Sus scrofa	GSM5111701	SRP308376	300	13531649100		Tibetan minipig
SRR11526970	PRJNA612825	Spleen	2021-04-30T00:00:00Z	RNA-Seq	SAMN14401354	4661138136	14402055300	Spleen	CHINESE ACADEMY OF AGRICULTURAL SCIENCES	public	sra,fastq	SRX8098030	Illumina HiSeq 2000	PAIRED	cDNA	TRANSCRIPTOMIC	Sus scrofa	M300-2SP	SRP256022	300	14402055300	M300_2SP	Meishan	female		300day
SRR10764487	PRJNA597497	Spleen	2021-02-26T00:00:00Z	RNA-Seq	SAMN13676557	5841045781	15074652716	spleen	HUAZHONG AGRICULTURAL UNIVERSITY	public	fastq,sra	SRX7438759	HiSeq X Ten	PAIRED	cDNA	TRANSCRIPTOMIC	Sus scrofa	MS-2W-1-Spleen	SRP238708	298	15074652716	MS-2W-1-Spleen-RNA	Meishan	male		2 weeks
SRR7777940	PRJNA488960	Spleen	2019-10-02T00:00:00Z	RNA-Seq	SAMN09946169	5645816058	15450115800	spleen	HUAZHONG AGRICULTURE UNIVERSITY	public	fastq,sra	SRX4633131	Illumina HiSeq 2000	PAIRED	cDNA	TRANSCRIPTOMIC	Sus scrofa	TC683-spleen	SRP159430	300	15450115800	TC1_s	Tongcheng	male		35 days
SRR7777941	PRJNA488960	Spleen	2019-10-02T00:00:00Z	RNA-Seq	SAMN09946168	4304599275	12017013300	spleen	HUAZHONG AGRICULTURE UNIVERSITY	public	fastq,sra	SRX4633130	Illumina HiSeq 2000	PAIRED	cDNA	TRANSCRIPTOMIC	Sus scrofa	LW88-spleen	SRP159430	300	12017013300	LW3_s	Large White	male		35 days
SRR7777942	PRJNA488960	Spleen	2019-10-02T00:00:00Z	RNA-Seq	SAMN09946167	5046685311	14318339400	spleen	HUAZHONG AGRICULTURE UNIVERSITY	public	fastq,sra	SRX4633129	Illumina HiSeq 2000	PAIRED	cDNA	TRANSCRIPTOMIC	Sus scrofa	LW82-spleen	SRP159430	300	14318339400	LW2_s	Large White	male		35 days
SRR7777943	PRJNA488960	Spleen	2019-10-02T00:00:00Z	RNA-Seq	SAMN09946166	5513498773	15660179700	spleen	HUAZHONG AGRICULTURE UNIVERSITY	public	sra,fastq	SRX4633128	Illumina HiSeq 2000	PAIRED	cDNA	TRANSCRIPTOMIC	Sus scrofa	LW71-spleen	SRP159430	300	15660179700	LW1_s	Large White	male		35 days
SRR7777946	PRJNA488960	Spleen	2019-10-02T00:00:00Z	RNA-Seq	SAMN09946171	5255229415	14632087800	spleen	HUAZHONG AGRICULTURE UNIVERSITY	public	sra,fastq	SRX4633125	Illumina HiSeq 2000	PAIRED	cDNA	TRANSCRIPTOMIC	Sus scrofa	TC985-spleen	SRP159430	300	14632087800	TC3_s	Tongcheng	male		35 days
SRR7777947	PRJNA488960	Spleen	2019-10-02T00:00:00Z	RNA-Seq	SAMN09946170	5460885927	14864160900	spleen	HUAZHONG AGRICULTURE UNIVERSITY	public	sra,fastq	SRX4633124	Illumina HiSeq 2000	PAIRED	cDNA	TRANSCRIPTOMIC	Sus scrofa	TC685-spleen	SRP159430	300	14864160900	TC2_s	Tongcheng	male		35 days
SRR6203225	PRJNA415431	Spleen	2018-11-04T00:00:00Z	RNA-Seq	SAMN07822591	6679766108	14739463500	spleen	GEO	public	sra,fastq	SRX3313032	Illumina HiSeq 4000	PAIRED	cDNA	TRANSCRIPTOMIC	Sus scrofa	GSM2828341	SRP120984	300	14739463500		Y x L		GSM2828341	7-day old
SRR6203226	PRJNA415431	Spleen	2018-11-04T00:00:00Z	RNA-Seq	SAMN07822590	6767949518	14859362063	spleen	GEO	public	sra,fastq	SRX3313033	Illumina HiSeq 4000	PAIRED	cDNA	TRANSCRIPTOMIC	Sus scrofa	GSM2828342	SRP120984	292	14859362063		Y x L		GSM2828342	7-day old
SRR6203227	PRJNA415431	Spleen	2018-11-04T00:00:00Z	RNA-Seq	SAMN07822578	6149248281	14683679400	spleen	GEO	public	sra,fastq	SRX3313034	Illumina HiSeq 4000	PAIRED	cDNA	TRANSCRIPTOMIC	Sus scrofa	GSM2828343	SRP120984	300	14683679400		Y x L		GSM2828343	7-day old
SRR6203228	PRJNA415431	Spleen	2018-11-04T00:00:00Z	RNA-Seq	SAMN07822581	8151495024	18062332500	spleen	GEO	public	sra,fastq	SRX3313035	Illumina HiSeq 4000	PAIRED	cDNA	TRANSCRIPTOMIC	Sus scrofa	GSM2828344	SRP120984	294	18062332500		Y x L		GSM2828344	7-day old
SRR6203229	PRJNA415431	Spleen	2018-11-04T00:00:00Z	RNA-Seq	SAMN07822580	5464431572	12230766900	spleen	GEO	public	fastq,sra	SRX3313036	Illumina HiSeq 4000	PAIRED	cDNA	TRANSCRIPTOMIC	Sus scrofa	GSM2828345	SRP120984	300	12230766900		Y x L		GSM2828345	7-day old
SRR6203230	PRJNA415431	Spleen	2018-11-04T00:00:00Z	RNA-Seq	SAMN07822579	6727738262	16602912900	spleen	GEO	public	sra,fastq	SRX3313037	Illumina HiSeq 4000	PAIRED	cDNA	TRANSCRIPTOMIC	Sus scrofa	GSM2828346	SRP120984	300	16602912900		Y x L		GSM2828346	7-day old
SRR6240076	PRJNA416652	Spleen	2018-02-19T00:00:00Z	RNA-Seq	SAMN07959855	4845431452	12029372700	spleen	GEO	public	fastq,sra	SRX3347449	HiSeq X Ten	PAIRED	cDNA	TRANSCRIPTOMIC	Sus scrofa domesticus	GSM2836916	SRP123226	300	12029372700				GSM2836916
SRR6240077	PRJNA416652	Spleen	2018-02-19T00:00:00Z	RNA-Seq	SAMN07959854	5055272421	12408111900	spleen	GEO	public	sra,fastq	SRX3347450	HiSeq X Ten	PAIRED	cDNA	TRANSCRIPTOMIC	Sus scrofa domesticus	GSM2836917	SRP123226	300	12408111900				GSM2836917
SRR6240078	PRJNA416652	Spleen	2018-02-19T00:00:00Z	RNA-Seq	SAMN07959914	4150958687	10207719900	spleen	GEO	public	fastq,sra	SRX3347451	HiSeq X Ten	PAIRED	cDNA	TRANSCRIPTOMIC	Sus scrofa domesticus	GSM2836918	SRP123226	300	10207719900				GSM2836918
SRR6240079	PRJNA416652	Spleen	2018-02-19T00:00:00Z	RNA-Seq	SAMN07959913	5039452243	12202280400	spleen	GEO	public	fastq,sra	SRX3347452	HiSeq X Ten	PAIRED	cDNA	TRANSCRIPTOMIC	Sus scrofa domesticus	GSM2836919	SRP123226	300	12202280400				GSM2836919
SRR6240080	PRJNA416652	Spleen	2018-02-19T00:00:00Z	RNA-Seq	SAMN07959912	5110605838	12135301500	spleen	GEO	public	fastq,sra	SRX3347453	HiSeq X Ten	PAIRED	cDNA	TRANSCRIPTOMIC	Sus scrofa domesticus	GSM2836920	SRP123226	300	12135301500				GSM2836920
SRR6240081	PRJNA416652	Spleen	2018-02-19T00:00:00Z	RNA-Seq	SAMN07959911	5349983712	12727654200	spleen	GEO	public	sra,fastq	SRX3347454	HiSeq X Ten	PAIRED	cDNA	TRANSCRIPTOMIC	Sus scrofa domesticus	GSM2836921	SRP123226	300	12727654200				GSM2836921
SRR6240082	PRJNA416652	Spleen	2018-02-19T00:00:00Z	RNA-Seq	SAMN07959910	5715601927	13569353400	spleen	GEO	public	fastq,sra	SRX3347455	HiSeq X Ten	PAIRED	cDNA	TRANSCRIPTOMIC	Sus scrofa domesticus	GSM2836922	SRP123226	300	13569353400				GSM2836922
SRR6240083	PRJNA416652	Spleen	2018-02-19T00:00:00Z	RNA-Seq	SAMN07959909	4341027726	10321298100	spleen	GEO	public	fastq,sra	SRX3347456	HiSeq X Ten	PAIRED	cDNA	TRANSCRIPTOMIC	Sus scrofa domesticus	GSM2836923	SRP123226	300	10321298100				GSM2836923
SRR6240084	PRJNA416652	Spleen	2018-02-19T00:00:00Z	RNA-Seq	SAMN07959908	5117716161	12288836700	spleen	GEO	public	fastq,sra	SRX3347457	HiSeq X Ten	PAIRED	cDNA	TRANSCRIPTOMIC	Sus scrofa domesticus	GSM2836924	SRP123226	300	12288836700				GSM2836924
SRR6240085	PRJNA416652	Spleen	2018-02-19T00:00:00Z	RNA-Seq	SAMN07959907	4525156710	11188610100	spleen	GEO	public	fastq,sra	SRX3347458	HiSeq X Ten	PAIRED	cDNA	TRANSCRIPTOMIC	Sus scrofa domesticus	GSM2836925	SRP123226	300	11188610100				GSM2836925
SRR6240086	PRJNA416652	Spleen	2018-02-19T00:00:00Z	RNA-Seq	SAMN07959906	4358161763	10822879800	spleen	GEO	public	sra,fastq	SRX3347459	HiSeq X Ten	PAIRED	cDNA	TRANSCRIPTOMIC	Sus scrofa domesticus	GSM2836926	SRP123226	300	10822879800				GSM2836926
SRR6240087	PRJNA416652	Spleen	2018-02-19T00:00:00Z	RNA-Seq	SAMN07959905	4144513716	10067068800	spleen	GEO	public	sra,fastq	SRX3347460	HiSeq X Ten	PAIRED	cDNA	TRANSCRIPTOMIC	Sus scrofa domesticus	GSM2836927	SRP123226	300	10067068800				GSM2836927
SRR6240088	PRJNA416652	Spleen	2018-02-19T00:00:00Z	RNA-Seq	SAMN07959904	7129371142	16715543400	spleen	GEO	public	fastq,sra	SRX3347461	HiSeq X Ten	PAIRED	cDNA	TRANSCRIPTOMIC	Sus scrofa domesticus	GSM2836928	SRP123226	300	16715543400				GSM2836928
SRR6240089	PRJNA416652	Spleen	2018-02-19T00:00:00Z	RNA-Seq	SAMN07959903	8631204587	20766279900	spleen	GEO	public	fastq,sra	SRX3347462	HiSeq X Ten	PAIRED	cDNA	TRANSCRIPTOMIC	Sus scrofa domesticus	GSM2836929	SRP123226	300	20766279900				GSM2836929
SRR6240090	PRJNA416652	Spleen	2018-02-19T00:00:00Z	RNA-Seq	SAMN07959902	5958472493	14122317000	spleen	GEO	public	sra,fastq	SRX3347463	HiSeq X Ten	PAIRED	cDNA	TRANSCRIPTOMIC	Sus scrofa domesticus	GSM2836930	SRP123226	300	14122317000				GSM2836930
SRR6240091	PRJNA416652	Spleen	2018-02-19T00:00:00Z	RNA-Seq	SAMN07959901	4306950884	10442144700	spleen	GEO	public	fastq,sra	SRX3347464	HiSeq X Ten	PAIRED	cDNA	TRANSCRIPTOMIC	Sus scrofa	GSM2836931	SRP123226	300	10442144700				GSM2836931
SRR6240092	PRJNA416652	Spleen	2018-02-19T00:00:00Z	RNA-Seq	SAMN07959900	4127913869	10104476400	spleen	GEO	public	fastq,sra	SRX3347465	HiSeq X Ten	PAIRED	cDNA	TRANSCRIPTOMIC	Sus scrofa	GSM2836932	SRP123226	300	10104476400				GSM2836932
SRR6240093	PRJNA416652	Spleen	2018-02-19T00:00:00Z	RNA-Seq	SAMN07959899	4156784985	10056085800	spleen	GEO	public	sra,fastq	SRX3347466	HiSeq X Ten	PAIRED	cDNA	TRANSCRIPTOMIC	Sus scrofa	GSM2836933	SRP123226	300	10056085800				GSM2836933
SRR12805718	PRJNA531381	Liver	2021-10-18T00:00:00Z	RNA-Seq	SAMN22234696	4929163484	16079691322	liver	HUNAN AGRICULTURAL UNIVERSITY	public	sra,fastq	SRX9274499	Illumina NovaSeq 6000	PAIRED	cDNA	TRANSCRIPTOMIC	Sus scrofa domesticus	NX21d3L2	SRP211773	302	16079691322	3	ningxiang	male
SRR12805727	PRJNA531381	Liver	2021-10-18T00:00:00Z	RNA-Seq	SAMN22234695	4694672454	15299042764	liver	HUNAN AGRICULTURAL UNIVERSITY	public	sra,fastq	SRX9274490	Illumina NovaSeq 6000	PAIRED	cDNA	TRANSCRIPTOMIC	Sus scrofa domesticus	NX21d2L2	SRP211773	302	15299042764	2	ningxiang	male
SRR12805728	PRJNA531381	Liver	2021-10-18T00:00:00Z	RNA-Seq	SAMN22234694	4805972527	15640524130	liver	HUNAN AGRICULTURAL UNIVERSITY	public	fastq,sra	SRX9274489	Illumina NovaSeq 6000	PAIRED	cDNA	TRANSCRIPTOMIC	Sus scrofa domesticus	NX21d1L3	SRP211773	302	15640524130	1	ningxiang	male
SRR11526920	PRJNA612825	Liver	2021-04-30T00:00:00Z	RNA-Seq	SAMN14401429	6043867361	14821226700	Liver	CHINESE ACADEMY OF AGRICULTURAL SCIENCES	public	sra,fastq	SRX8098080	Illumina HiSeq 2000	PAIRED	cDNA	TRANSCRIPTOMIC	Sus scrofa	Y30-3LV-Rep3	SRP256022	300	14821226700	Y30_3LV-Rep3	Large Write	female		30day
SRR11526921	PRJNA612825	Liver	2021-04-30T00:00:00Z	RNA-Seq	SAMN14401428	6120726095	15173676300	Liver	CHINESE ACADEMY OF AGRICULTURAL SCIENCES	public	sra,fastq	SRX8098079	Illumina HiSeq 2000	PAIRED	cDNA	TRANSCRIPTOMIC	Sus scrofa	Y30-2LV-Rep2	SRP256022	300	15173676300	Y30_2LV-Rep2	Large Write	female		30day
SRR11526922	PRJNA612825	Liver	2021-04-30T00:00:00Z	RNA-Seq	SAMN14401427	5521546850	13619211300	Liver	CHINESE ACADEMY OF AGRICULTURAL SCIENCES	public	fastq,sra	SRX8098078	Illumina HiSeq 2000	PAIRED	cDNA	TRANSCRIPTOMIC	Sus scrofa	Y30-1LV-Rep1	SRP256022	300	13619211300	Y30_1LV-Rep1	Large Write	female		30day
SRR11526943	PRJNA612825	Liver	2021-04-30T00:00:00Z	RNA-Seq	SAMN14401409	5102801722	13370541300	Liver	CHINESE ACADEMY OF AGRICULTURAL SCIENCES	public	fastq,sra	SRX8098057	Illumina HiSeq 2000	PAIRED	cDNA	TRANSCRIPTOMIC	Sus scrofa	M300-3LV-Rep3	SRP256022	300	13370541300	M300_3LV-Rep3	Meishan	female		300day
SRR11526944	PRJNA612825	Liver	2021-04-30T00:00:00Z	RNA-Seq	SAMN14401408	5567793157	15338898000	Liver	CHINESE ACADEMY OF AGRICULTURAL SCIENCES	public	sra,fastq	SRX8098056	Illumina HiSeq 2000	PAIRED	cDNA	TRANSCRIPTOMIC	Sus scrofa	M300-2LV-Rep2	SRP256022	300	15338898000	M300_2LV-Rep2	Meishan	female		300day
SRR11526946	PRJNA612825	Liver	2021-04-30T00:00:00Z	RNA-Seq	SAMN14401407	5042000920	13771782000	Liver	CHINESE ACADEMY OF AGRICULTURAL SCIENCES	public	fastq,sra	SRX8098054	Illumina HiSeq 2000	PAIRED	cDNA	TRANSCRIPTOMIC	Sus scrofa	M300-1LV-Rep1	SRP256022	300	13771782000	M300_1LV-Rep1	Meishan	female		300day
SRR11526969	PRJNA612825	Liver	2021-04-30T00:00:00Z	RNA-Seq	SAMN14401388	6104587263	16399159800	Liver	CHINESE ACADEMY OF AGRICULTURAL SCIENCES	public	fastq,sra	SRX8098031	Illumina HiSeq 2000	PAIRED	cDNA	TRANSCRIPTOMIC	Sus scrofa	M180-3LV-Rep3	SRP256022	300	16399159800	M180_3LV-Rep3	Meishan	female		180day
SRR11526971	PRJNA612825	Liver	2021-04-30T00:00:00Z	RNA-Seq	SAMN14401387	5372477466	14787107700	Liver	CHINESE ACADEMY OF AGRICULTURAL SCIENCES	public	fastq,sra	SRX8098029	Illumina HiSeq 2000	PAIRED	cDNA	TRANSCRIPTOMIC	Sus scrofa	M180-2LV-Rep2	SRP256022	300	14787107700	M180_2LV-Rep2	Meishan	female		180day
SRR11526972	PRJNA612825	Liver	2021-04-30T00:00:00Z	RNA-Seq	SAMN14401386	6638954972	15003111000	Liver	CHINESE ACADEMY OF AGRICULTURAL SCIENCES	public	fastq,sra	SRX8098028	Illumina HiSeq 2000	PAIRED	cDNA	TRANSCRIPTOMIC	Sus scrofa	M180-1LV-Rep1	SRP256022	300	15003111000	M180_1LV-Rep1	Meishan	female		180day
SRR11526993	PRJNA612825	Liver	2021-04-30T00:00:00Z	RNA-Seq	SAMN14401367	5917279681	14157393000	Liver	CHINESE ACADEMY OF AGRICULTURAL SCIENCES	public	fastq,sra	SRX8098007	Illumina HiSeq 2000	PAIRED	cDNA	TRANSCRIPTOMIC	Sus scrofa	M30-3LV-Rep3	SRP256022	300	14157393000	M30_3LV-Rep3	Meishan	female		30day
SRR11526994	PRJNA612825	Liver	2021-04-30T00:00:00Z	RNA-Seq	SAMN14401366	5513421027	14051843100	Liver	CHINESE ACADEMY OF AGRICULTURAL SCIENCES	public	fastq,sra	SRX8098006	Illumina HiSeq 2000	PAIRED	cDNA	TRANSCRIPTOMIC	Sus scrofa	M30-2LV-Rep2	SRP256022	300	14051843100	M30_2LV-Rep2	Meishan	female		30day
SRR11526995	PRJNA612825	Liver	2021-04-30T00:00:00Z	RNA-Seq	SAMN14401365	5811875464	14720572500	Liver	CHINESE ACADEMY OF AGRICULTURAL SCIENCES	public	sra,fastq	SRX8098005	Illumina HiSeq 2000	PAIRED	cDNA	TRANSCRIPTOMIC	Sus scrofa	M30-1LV-Rep1	SRP256022	300	14720572500	M30_1LV-Rep1	Meishan	female		30day
SRR11527013	PRJNA612825	Liver	2021-04-30T00:00:00Z	RNA-Seq	SAMN14401470	5765889096	14238585300	Liver	CHINESE ACADEMY OF AGRICULTURAL SCIENCES	public	fastq,sra	SRX8097987	Illumina HiSeq 2000	PAIRED	cDNA	TRANSCRIPTOMIC	Sus scrofa	Y300-3LV-Rep3	SRP256022	300	14238585300	Y300_3LV-Rep3	Large Write	female		300day
SRR11527014	PRJNA612825	Liver	2021-04-30T00:00:00Z	RNA-Seq	SAMN14401469	6112040266	15208315800	Liver	CHINESE ACADEMY OF AGRICULTURAL SCIENCES	public	sra,fastq	SRX8097986	Illumina HiSeq 2000	PAIRED	cDNA	TRANSCRIPTOMIC	Sus scrofa	Y300-2LV-Rep2	SRP256022	300	15208315800	Y300_2LV-Rep2	Large Write	female		300day
SRR11527015	PRJNA612825	Liver	2021-04-30T00:00:00Z	RNA-Seq	SAMN14401468	5691769520	14123523600	Liver	CHINESE ACADEMY OF AGRICULTURAL SCIENCES	public	sra,fastq	SRX8097985	Illumina HiSeq 2000	PAIRED	cDNA	TRANSCRIPTOMIC	Sus scrofa	Y300-1LV-Rep1	SRP256022	300	14123523600	Y300_1LV-Rep1	Large Write	female		300day
SRR11527036	PRJNA612825	Liver	2021-04-30T00:00:00Z	RNA-Seq	SAMN14401449	6307370745	15581939700	Liver	CHINESE ACADEMY OF AGRICULTURAL SCIENCES	public	fastq,sra	SRX8097964	Illumina HiSeq 2000	PAIRED	cDNA	TRANSCRIPTOMIC	Sus scrofa	Y180-3LV-Rep3	SRP256022	300	15581939700	Y180_3LV-Rep3	Large Write	female		180day
SRR11527038	PRJNA612825	Liver	2021-04-30T00:00:00Z	RNA-Seq	SAMN14401447	6266985098	16167951600	Liver	CHINESE ACADEMY OF AGRICULTURAL SCIENCES	public	sra,fastq	SRX8097962	Illumina HiSeq 2000	PAIRED	cDNA	TRANSCRIPTOMIC	Sus scrofa	Y180-1LV-Rep1	SRP256022	300	16167951600	Y180_1LV-Rep1	Large Write	female		180day
SRR6253564	PRJNA417068	Liver	2017-11-15T00:00:00Z	RNA-Seq	SAMN07975614	12010144552	16964131860	liver	GEO	public	sra,fastq	SRX3360333	Illumina HiSeq 2000	PAIRED	cDNA	TRANSCRIPTOMIC	Sus scrofa	GSM2839437	SRP123597	180	16964131860		PIC		GSM2839437	150 days
SRR6253567	PRJNA417068	Liver	2017-11-15T00:00:00Z	RNA-Seq	SAMN07975640	13012286830	17887996080	liver	GEO	public	sra,fastq	SRX3360336	Illumina HiSeq 2000	PAIRED	cDNA	TRANSCRIPTOMIC	Sus scrofa	GSM2839440	SRP123597	180	17887996080		PIC		GSM2839440	150 days
SRR6253566	PRJNA417068	Liver	2017-11-15T00:00:00Z	RNA-Seq	SAMN07975641	12531407105	17195012640	liver	GEO	public	sra,fastq	SRX3360335	Illumina HiSeq 2000	PAIRED	cDNA	TRANSCRIPTOMIC	Sus scrofa	GSM2839439	SRP123597	180	17195012640		PIC		GSM2839439	150 days
SRR6253563	PRJNA417068	Liver	2017-11-15T00:00:00Z	RNA-Seq	SAMN07975615	12359588010	16980440580	liver	GEO	public	fastq,sra	SRX3360332	Illumina HiSeq 2000	PAIRED	cDNA	TRANSCRIPTOMIC	Sus scrofa	GSM2839436	SRP123597	180	16980440580		PIC		GSM2839436	150 days
SRR6253565	PRJNA417068	Liver	2017-11-15T00:00:00Z	RNA-Seq	SAMN07975613	13935218042	19094198760	liver	GEO	public	sra,fastq	SRX3360334	Illumina HiSeq 2000	PAIRED	cDNA	TRANSCRIPTOMIC	Sus scrofa	GSM2839438	SRP123597	180	19094198760		PIC		GSM2839438	150 days
SRR9302351	PRJNA548867	Lung	2019-06-21T00:00:00Z	RNA-Seq	SAMN12057768	6249869889	16088718300	lung	GEO	public	fastq,sra	SRX6071093	Illumina HiSeq 2500	PAIRED	cDNA	TRANSCRIPTOMIC	Sus scrofa	GSM3890982	SRP201429	300	16088718300				GSM3890982
SRR9302352	PRJNA548867	Lung	2019-06-21T00:00:00Z	RNA-Seq	SAMN12057767	5446898078	14071253700	lung	GEO	public	sra,fastq	SRX6071094	Illumina HiSeq 2500	PAIRED	cDNA	TRANSCRIPTOMIC	Sus scrofa	GSM3890983	SRP201429	300	14071253700				GSM3890983
SRR9302353	PRJNA548867	Lung	2019-06-21T00:00:00Z	RNA-Seq	SAMN12057766	6179551488	15837477000	lung	GEO	public	sra,fastq	SRX6071095	Illumina HiSeq 2500	PAIRED	cDNA	TRANSCRIPTOMIC	Sus scrofa	GSM3890984	SRP201429	300	15837477000				GSM3890984
SRR9302354	PRJNA548867	Lung	2019-06-21T00:00:00Z	RNA-Seq	SAMN12057765	5815943730	14827209900	lung	GEO	public	sra,fastq	SRX6071096	Illumina HiSeq 2500	PAIRED	cDNA	TRANSCRIPTOMIC	Sus scrofa	GSM3890985	SRP201429	300	14827209900				GSM3890985
SRR9302355	PRJNA548867	Lung	2019-06-21T00:00:00Z	RNA-Seq	SAMN12057764	6494234059	16517326500	lung	GEO	public	sra,fastq	SRX6071097	Illumina HiSeq 2500	PAIRED	cDNA	TRANSCRIPTOMIC	Sus scrofa	GSM3890986	SRP201429	300	16517326500				GSM3890986
SRR9302356	PRJNA548867	Lung	2019-06-21T00:00:00Z	RNA-Seq	SAMN12057763	6950143205	17722338300	lung	GEO	public	sra,fastq	SRX6071098	Illumina HiSeq 2500	PAIRED	cDNA	TRANSCRIPTOMIC	Sus scrofa	GSM3890987	SRP201429	300	17722338300				GSM3890987
SRR7624145	PRJNA483488	Lung	2018-09-25T00:00:00Z	RNA-Seq	SAMN09741972	6080321345	14598696300	lung	GEO	public	sra,fastq	SRX4488066	HiSeq X Ten	PAIRED	cDNA	TRANSCRIPTOMIC	Sus scrofa	GSM3314447	SRP155770	300	14598696300				GSM3314447	last day before birth
SRR7624146	PRJNA483488	Lung	2018-09-25T00:00:00Z	RNA-Seq	SAMN09741971	5699423439	13604618700	lung	GEO	public	fastq,sra	SRX4488067	HiSeq X Ten	PAIRED	cDNA	TRANSCRIPTOMIC	Sus scrofa	GSM3314448	SRP155770	300	13604618700				GSM3314448	last day before birth
SRR7624147	PRJNA483488	Lung	2018-09-25T00:00:00Z	RNA-Seq	SAMN09741970	5618554658	13518764700	lung	GEO	public	sra,fastq	SRX4488068	HiSeq X Ten	PAIRED	cDNA	TRANSCRIPTOMIC	Sus scrofa	GSM3314449	SRP155770	300	13518764700				GSM3314449	last day before birth
SRR7624148	PRJNA483488	Lung	2018-09-25T00:00:00Z	RNA-Seq	SAMN09741969	6066163661	14435072100	lung	GEO	public	fastq,sra	SRX4488069	HiSeq X Ten	PAIRED	cDNA	TRANSCRIPTOMIC	Sus scrofa	GSM3314450	SRP155770	300	14435072100				GSM3314450	2 days after birth
SRR7624149	PRJNA483488	Lung	2018-09-25T00:00:00Z	RNA-Seq	SAMN09741968	6472969065	15413641800	lung	GEO	public	sra,fastq	SRX4488070	HiSeq X Ten	PAIRED	cDNA	TRANSCRIPTOMIC	Sus scrofa	GSM3314451	SRP155770	300	15413641800				GSM3314451	2 days after birth
SRR7624150	PRJNA483488	Lung	2018-09-25T00:00:00Z	RNA-Seq	SAMN09741967	6232092786	14894220600	lung	GEO	public	sra,fastq	SRX4488071	HiSeq X Ten	PAIRED	cDNA	TRANSCRIPTOMIC	Sus scrofa	GSM3314452	SRP155770	300	14894220600				GSM3314452	2 days after birth
SRR4916228	PRJNA352443	Lung	2017-11-03T00:00:00Z	RNA-Seq	SAMN05981318	6507849641	16283594700	lung	CHINESE ACADEMY OF AGRICULTURAL SCIENCES	public	sra,fastq	SRX2327190	Illumina HiSeq 4000	PAIRED	cDNA	TRANSCRIPTOMIC	Sus scrofa	12hGSWWA	SRP092582	300	16283594700		missing	missing		four weeks
SRR4916956	PRJNA352443	Lung	2017-11-03T00:00:00Z	RNA-Seq	SAMN05981319	6510573211	16281365700	lung	CHINESE ACADEMY OF AGRICULTURAL SCIENCES	public	sra,fastq	SRX2327191	Illumina HiSeq 4000	PAIRED	cDNA	TRANSCRIPTOMIC	Sus scrofa	12hFL12A	SRP092582	300	16281365700		missing	missing		four weeks
SRR4917363	PRJNA352443	Lung	2017-11-03T00:00:00Z	RNA-Seq	SAMN05981320	6519136062	16308327300	lung	CHINESE ACADEMY OF AGRICULTURAL SCIENCES	public	sra,fastq	SRX2327192	Illumina HiSeq 4000	PAIRED	cDNA	TRANSCRIPTOMIC	Sus scrofa	24hCA	SRP092582	300	16308327300		missing	missing		four weeks
SRR4917364	PRJNA352443	Lung	2017-11-03T00:00:00Z	RNA-Seq	SAMN05981321	6621376081	16349194500	lung	CHINESE ACADEMY OF AGRICULTURAL SCIENCES	public	fastq,sra	SRX2327193	Illumina HiSeq 4000	PAIRED	cDNA	TRANSCRIPTOMIC	Sus scrofa	24hGSWWA	SRP092582	300	16349194500		missing	missing		four weeks
SRR4917683	PRJNA352443	Lung	2017-11-03T00:00:00Z	RNA-Seq	SAMN05981322	6637507094	16311681000	lung	CHINESE ACADEMY OF AGRICULTURAL SCIENCES	public	sra,fastq	SRX2327194	Illumina HiSeq 4000	PAIRED	cDNA	TRANSCRIPTOMIC	Sus scrofa	24hFL12A	SRP092582	300	16311681000		missing	missing		four weeks
SRR4918135	PRJNA352443	Lung	2017-11-03T00:00:00Z	RNA-Seq	SAMN05981323	6578505007	16291218300	lung	CHINESE ACADEMY OF AGRICULTURAL SCIENCES	public	sra,fastq	SRX2327195	Illumina HiSeq 4000	PAIRED	cDNA	TRANSCRIPTOMIC	Sus scrofa	12hCB	SRP092582	300	16291218300		missing	missing		four weeks
SRR4919131	PRJNA352443	Lung	2017-11-03T00:00:00Z	RNA-Seq	SAMN05981324	6599001592	16406787600	lung	CHINESE ACADEMY OF AGRICULTURAL SCIENCES	public	sra,fastq	SRX2327196	Illumina HiSeq 4000	PAIRED	cDNA	TRANSCRIPTOMIC	Sus scrofa	12hGSWWB	SRP092582	300	16406787600		missing	missing		four weeks
SRR4919188	PRJNA352443	Lung	2017-11-03T00:00:00Z	RNA-Seq	SAMN05981325	6517920538	16230934200	lung	CHINESE ACADEMY OF AGRICULTURAL SCIENCES	public	sra,fastq	SRX2327197	Illumina HiSeq 4000	PAIRED	cDNA	TRANSCRIPTOMIC	Sus scrofa	12hFL12B	SRP092582	300	16230934200		missing	missing		four weeks
SRR4920041	PRJNA352443	Lung	2017-11-03T00:00:00Z	RNA-Seq	SAMN05981326	6673382215	16352320200	lung	CHINESE ACADEMY OF AGRICULTURAL SCIENCES	public	sra,fastq	SRX2327299	Illumina HiSeq 3000	PAIRED	cDNA	TRANSCRIPTOMIC	Sus scrofa	24hCB	SRP092582	300	16352320200		missing	missing		four weeks
SRR4920043	PRJNA352443	Lung	2017-11-03T00:00:00Z	RNA-Seq	SAMN05981327	6570354909	16269284400	lung	CHINESE ACADEMY OF AGRICULTURAL SCIENCES	public	fastq,sra	SRX2327305	Illumina HiSeq 4000	PAIRED	cDNA	TRANSCRIPTOMIC	Sus scrofa	24hGSWWB	SRP092582	300	16269284400		missing	missing		four weeks
SRR4920045	PRJNA352443	Lung	2017-11-03T00:00:00Z	RNA-Seq	SAMN05981328	6601957995	16361530500	lung	CHINESE ACADEMY OF AGRICULTURAL SCIENCES	public	fastq,sra	SRX2327306	Illumina HiSeq 4000	PAIRED	cDNA	TRANSCRIPTOMIC	Sus scrofa	24hFL12B	SRP092582	300	16361530500		missing	missing		four weeks
SRR12805713	PRJNA531381	Longissimus dorsi muscle	2021-10-18T00:00:00Z	RNA-Seq	SAMN22234698	5326412657	17433122140	longissimus dorsi muscle	HUNAN AGRICULTURAL UNIVERSITY	public	sra,fastq	SRX9274504	Illumina NovaSeq 6000	PAIRED	cDNA	TRANSCRIPTOMIC	Sus scrofa domesticus	NX21d2M3	SRP211773	302	17433122140	8	ningxiang	male		na
SRR12805714	PRJNA531381	Longissimus dorsi muscle	2021-10-18T00:00:00Z	RNA-Seq	SAMN22234697	5141773444	16815824174	longissimus dorsi muscle	HUNAN AGRICULTURAL UNIVERSITY	public	fastq,sra	SRX9274503	Illumina NovaSeq 6000	PAIRED	cDNA	TRANSCRIPTOMIC	Sus scrofa domesticus	NX21d1M3	SRP211773	302	16815824174	7	ningxiang	male		na
SRR12805712	PRJNA531381	Longissimus dorsi muscle	2021-10-18T00:00:00Z	RNA-Seq	SAMN22234699	5122065904	16584528716	longissimus dorsi muscle	HUNAN AGRICULTURAL UNIVERSITY	public	fastq,sra	SRX9274505	Illumina NovaSeq 6000	PAIRED	cDNA	TRANSCRIPTOMIC	Sus scrofa domesticus	NX21d3M1	SRP211773	302	16584528716	9	ningxiang	male		na
SRR11526908	PRJNA612825	Longissimus dorsi muscle	2021-04-30T00:00:00Z	RNA-Seq	SAMN14401440	6006916483	14539861500	Longissimus Dorsi Muscle	CHINESE ACADEMY OF AGRICULTURAL SCIENCES	public	sra,fastq	SRX8098092	Illumina HiSeq 2000	PAIRED	cDNA	TRANSCRIPTOMIC	Sus scrofa	Y180-3DM-Rep3	SRP256022	300	14539861500	Y180_3DM-Rep3	Large Write	female		180day
SRR11526909	PRJNA612825	Longissimus dorsi muscle	2021-04-30T00:00:00Z	RNA-Seq	SAMN14401439	5687808330	14054720100	Longissimus Dorsi Muscle	CHINESE ACADEMY OF AGRICULTURAL SCIENCES	public	fastq,sra	SRX8098091	Illumina HiSeq 2000	PAIRED	cDNA	TRANSCRIPTOMIC	Sus scrofa	Y180-2DM-Rep2	SRP256022	300	14054720100	Y180_2DM-Rep2	Large Write	female		180day
SRR11526910	PRJNA612825	Longissimus dorsi muscle	2021-04-30T00:00:00Z	RNA-Seq	SAMN14401438	6035242552	14748399000	Longissimus Dorsi Muscle	CHINESE ACADEMY OF AGRICULTURAL SCIENCES	public	fastq,sra	SRX8098090	Illumina HiSeq 2000	PAIRED	cDNA	TRANSCRIPTOMIC	Sus scrofa	Y180-1DM-Rep1	SRP256022	300	14748399000	Y180_1DM-Rep1	Large Write	female		180day
SRR11526915	PRJNA612825	Longissimus dorsi muscle	2021-04-30T00:00:00Z	RNA-Seq	SAMN14401357	5551622710	14183808000	Longissimus Dorsi Muscle	CHINESE ACADEMY OF AGRICULTURAL SCIENCES	public	fastq,sra	SRX8098085	Illumina HiSeq 2000	PAIRED	cDNA	TRANSCRIPTOMIC	Sus scrofa	M30-2DM-Rep2	SRP256022	300	14183808000	M30_2DM-Rep2	Meishan	female		30day
SRR11526926	PRJNA612825	Longissimus dorsi muscle	2021-04-30T00:00:00Z	RNA-Seq	SAMN14401356	6133961701	15561208200	Longissimus Dorsi Muscle	CHINESE ACADEMY OF AGRICULTURAL SCIENCES	public	fastq,sra	SRX8098074	Illumina HiSeq 2000	PAIRED	cDNA	TRANSCRIPTOMIC	Sus scrofa	M30-1DM-Rep1	SRP256022	300	15561208200	M30_1DM-Rep1	Meishan	female		30day
SRR11526929	PRJNA612825	Longissimus dorsi muscle	2021-04-30T00:00:00Z	RNA-Seq	SAMN14401421	5671880546	14350567500	Longissimus Dorsi Muscle	CHINESE ACADEMY OF AGRICULTURAL SCIENCES	public	fastq,sra	SRX8098071	Illumina HiSeq 2000	PAIRED	cDNA	TRANSCRIPTOMIC	Sus scrofa	Y30-3DM-Rep3	SRP256022	300	14350567500	Y30_3DM-Rep3	Large Write	female		30day
SRR11526930	PRJNA612825	Longissimus dorsi muscle	2021-04-30T00:00:00Z	RNA-Seq	SAMN14401420	6337420587	16037651100	Longissimus Dorsi Muscle	CHINESE ACADEMY OF AGRICULTURAL SCIENCES	public	sra,fastq	SRX8098070	Illumina HiSeq 2000	PAIRED	cDNA	TRANSCRIPTOMIC	Sus scrofa	Y30-2DM-Rep2	SRP256022	300	16037651100	Y30_2DM-Rep2	Large Write	female		30day
SRR11526931	PRJNA612825	Longissimus dorsi muscle	2021-04-30T00:00:00Z	RNA-Seq	SAMN14401419	6226886808	15789813300	Longissimus Dorsi Muscle	CHINESE ACADEMY OF AGRICULTURAL SCIENCES	public	sra,fastq	SRX8098069	Illumina HiSeq 2000	PAIRED	cDNA	TRANSCRIPTOMIC	Sus scrofa	Y30-1DM-Rep1	SRP256022	300	15789813300	Y30_1DM-Rep1	Large Write	female		30day
SRR11526955	PRJNA612825	Longissimus dorsi muscle	2021-04-30T00:00:00Z	RNA-Seq	SAMN14401400	5612154548	15379707000	Longissimus Dorsi Muscle	CHINESE ACADEMY OF AGRICULTURAL SCIENCES	public	fastq,sra	SRX8098045	Illumina HiSeq 2000	PAIRED	cDNA	TRANSCRIPTOMIC	Sus scrofa	M300-3DM-Rep3	SRP256022	300	15379707000	M300_3DM-Rep3	Meishan	female		300day
SRR11526957	PRJNA612825	Longissimus dorsi muscle	2021-04-30T00:00:00Z	RNA-Seq	SAMN14401399	5765567996	15732480000	Longissimus Dorsi Muscle	CHINESE ACADEMY OF AGRICULTURAL SCIENCES	public	sra,fastq	SRX8098043	Illumina HiSeq 2000	PAIRED	cDNA	TRANSCRIPTOMIC	Sus scrofa	M300-2DM-Rep2	SRP256022	300	15732480000	M300_2DM-Rep2	Meishan	female		300day
SRR11526958	PRJNA612825	Longissimus dorsi muscle	2021-04-30T00:00:00Z	RNA-Seq	SAMN14401398	5999696273	15903382800	Longissimus Dorsi Muscle	CHINESE ACADEMY OF AGRICULTURAL SCIENCES	public	fastq,sra	SRX8098042	Illumina HiSeq 2000	PAIRED	cDNA	TRANSCRIPTOMIC	Sus scrofa	M300-1DM-Rep1	SRP256022	300	15903382800	M300_1DM-Rep1	Meishan	female		300day
SRR11526979	PRJNA612825	Longissimus dorsi muscle	2021-04-30T00:00:00Z	RNA-Seq	SAMN14401379	6459347694	17583918600	Longissimus Dorsi Muscle	CHINESE ACADEMY OF AGRICULTURAL SCIENCES	public	sra,fastq	SRX8098021	Illumina HiSeq 2000	PAIRED	cDNA	TRANSCRIPTOMIC	Sus scrofa	M180-3DM-Rep3	SRP256022	300	17583918600	M180_3DM-Rep3	Meishan	female		180day
SRR11526980	PRJNA612825	Longissimus dorsi muscle	2021-04-30T00:00:00Z	RNA-Seq	SAMN14401378	7556286806	18129981900	Longissimus Dorsi Muscle	CHINESE ACADEMY OF AGRICULTURAL SCIENCES	public	fastq,sra	SRX8098020	Illumina HiSeq 2000	PAIRED	cDNA	TRANSCRIPTOMIC	Sus scrofa	M180-2DM-Rep2	SRP256022	300	18129981900	M180_2DM-Rep2	Meishan	female		180day
SRR11526982	PRJNA612825	Longissimus dorsi muscle	2021-04-30T00:00:00Z	RNA-Seq	SAMN14401377	6564881191	14935071600	Longissimus Dorsi Muscle	CHINESE ACADEMY OF AGRICULTURAL SCIENCES	public	fastq,sra	SRX8098018	Illumina HiSeq 2000	PAIRED	cDNA	TRANSCRIPTOMIC	Sus scrofa	M180-1DM-Rep1	SRP256022	300	14935071600	M180_1DM-Rep1	Meishan	female		180day
SRR11527006	PRJNA612825	Longissimus dorsi muscle	2021-04-30T00:00:00Z	RNA-Seq	SAMN14401358	5753059600	14681928600	Longissimus Dorsi Muscle	CHINESE ACADEMY OF AGRICULTURAL SCIENCES	public	sra,fastq	SRX8097994	Illumina HiSeq 2000	PAIRED	cDNA	TRANSCRIPTOMIC	Sus scrofa	M30-3DM-Rep3	SRP256022	300	14681928600	M30_3DM-Rep3	Meishan	female		30day
SRR11527023	PRJNA612825	Longissimus dorsi muscle	2021-04-30T00:00:00Z	RNA-Seq	SAMN14401461	6162783221	15039962400	Longissimus Dorsi Muscle	CHINESE ACADEMY OF AGRICULTURAL SCIENCES	public	fastq,sra	SRX8097977	Illumina HiSeq 2000	PAIRED	cDNA	TRANSCRIPTOMIC	Sus scrofa	Y300-3DM-Rep3	SRP256022	300	15039962400	Y300_3DM-Rep3	Large Write	female		300day
SRR11527024	PRJNA612825	Longissimus dorsi muscle	2021-04-30T00:00:00Z	RNA-Seq	SAMN14401460	7044501739	17296626600	Longissimus Dorsi Muscle	CHINESE ACADEMY OF AGRICULTURAL SCIENCES	public	fastq,sra	SRX8097976	Illumina HiSeq 2000	PAIRED	cDNA	TRANSCRIPTOMIC	Sus scrofa	Y300-2DM-Rep2	SRP256022	300	17296626600	Y300_2DM-Rep2	Large Write	female		300day
SRR11527025	PRJNA612825	Longissimus dorsi muscle	2021-04-30T00:00:00Z	RNA-Seq	SAMN14401459	6444577572	15551280000	Longissimus Dorsi Muscle	CHINESE ACADEMY OF AGRICULTURAL SCIENCES	public	sra,fastq	SRX8097975	Illumina HiSeq 2000	PAIRED	cDNA	TRANSCRIPTOMIC	Sus scrofa	Y300-1DM-Rep1	SRP256022	300	15551280000	Y300_1DM-Rep1	Large Write	female		300day
SRR2564774	PRJNA297855	Longissimus dorsi muscle	2017-02-10T00:00:00Z	RNA-Seq	SAMN04147108	9574005311	13763198520	longissimus dorsi	GEO	public	fastq,sra	SRX1307225	Illumina Genome Analyzer II	PAIRED	cDNA	TRANSCRIPTOMIC	Sus scrofa	GSM1902357	SRP064513	180	13763198520		multiple breeds		GSM1902357	multiple time points
SRR6853384	PRJNA438831	Skeletal muscle	2019-11-29T00:00:00Z	RNA-Seq	SAMN08729656	6478833579	16458038700	skeletal muscle	CHINESE ACADEMY OF AGRICULTURAL SCIENCES	public	sra,fastq	SRX3808607	Illumina HiSeq 2500	PAIRED	PCR	TRANSCRIPTOMIC	Sus scrofa	High_RFI2	SRP135940	300	16458038700	Mu_H2	Duroc	male		adult
SRR6853385	PRJNA438831	Skeletal muscle	2019-11-29T00:00:00Z	RNA-Seq	SAMN08729655	6057182682	15352729800	skeletal muscle	CHINESE ACADEMY OF AGRICULTURAL SCIENCES	public	fastq,sra	SRX3808606	Illumina HiSeq 2500	PAIRED	PCR	TRANSCRIPTOMIC	Sus scrofa	High_RFI1	SRP135940	300	15352729800	Mu_H1	Duroc	male		adult
SRR6853386	PRJNA438831	Skeletal muscle	2019-11-29T00:00:00Z	RNA-Seq	SAMN08729658	4816298045	12888498300	skeletal muscle	CHINESE ACADEMY OF AGRICULTURAL SCIENCES	public	fastq,sra	SRX3808605	Illumina HiSeq 2500	PAIRED	PCR	TRANSCRIPTOMIC	Sus scrofa	Low_RFI1	SRP135940	300	12888498300	Mu_L1	Duroc	male		adult
SRR6853387	PRJNA438831	Skeletal muscle	2019-11-29T00:00:00Z	RNA-Seq	SAMN08729657	6040296047	15257362800	skeletal muscle	CHINESE ACADEMY OF AGRICULTURAL SCIENCES	public	fastq,sra	SRX3808604	Illumina HiSeq 2500	PAIRED	PCR	TRANSCRIPTOMIC	Sus scrofa	High_RFI3	SRP135940	300	15257362800	Mu_H3	Duroc	male		adult
SRR6853388	PRJNA438831	Skeletal muscle	2019-11-29T00:00:00Z	RNA-Seq	SAMN08729660	4709571418	12495655800	skeletal muscle	CHINESE ACADEMY OF AGRICULTURAL SCIENCES	public	fastq,sra	SRX3808603	Illumina HiSeq 2500	PAIRED	PCR	TRANSCRIPTOMIC	Sus scrofa	Low_RFI3	SRP135940	300	12495655800	Mu_L3	Duroc	male		adult
SRR6853389	PRJNA438831	Skeletal muscle	2019-11-29T00:00:00Z	RNA-Seq	SAMN08729659	4509224580	12074607300	skeletal muscle	CHINESE ACADEMY OF AGRICULTURAL SCIENCES	public	sra,fastq	SRX3808602	Illumina HiSeq 2500	PAIRED	PCR	TRANSCRIPTOMIC	Sus scrofa	Low_RFI2	SRP135940	300	12074607300	Mu_L2	Duroc	male		adult
SRR7724848	PRJNA486202	Skeletal muscle	2019-09-08T00:00:00Z	RNA-Seq	SAMN09840078	7561149092	15990820200	Skeletal muscle	AGRICULTURAL GENOME INSTITUTE AT SHENZHEN, CHINESE ACADEMY OF AGRICULTURAL SCIENCES	public	sra,fastq	SRX4581433	HiSeq X Ten	PAIRED	cDNA	TRANSCRIPTOMIC	Sus scrofa	LE33_1	SRP158448	300	15990820200	LE33_1	Landrace	female
SRR7724859	PRJNA486202	Skeletal muscle	2019-09-08T00:00:00Z	RNA-Seq	SAMN09840104	6617409541	15923483400	Skeletal muscle	AGRICULTURAL GENOME INSTITUTE AT SHENZHEN, CHINESE ACADEMY OF AGRICULTURAL SCIENCES	public	fastq,sra	SRX4581422	HiSeq X Ten	PAIRED	cDNA	TRANSCRIPTOMIC	Sus scrofa	LE75_3	SRP158448	300	15923483400	LE75_3	Landrace	female
SRR7724860	PRJNA486202	Skeletal muscle	2019-09-08T00:00:00Z	RNA-Seq	SAMN09840105	6921183769	16052978100	Skeletal muscle	AGRICULTURAL GENOME INSTITUTE AT SHENZHEN, CHINESE ACADEMY OF AGRICULTURAL SCIENCES	public	sra,fastq	SRX4581421	HiSeq X Ten	PAIRED	cDNA	TRANSCRIPTOMIC	Sus scrofa	LE80_1	SRP158448	300	16052978100	LE80_1	Landrace	male
SRR7724861	PRJNA486202	Skeletal muscle	2019-09-08T00:00:00Z	RNA-Seq	SAMN09840098	6892744545	15654025200	Skeletal muscle	AGRICULTURAL GENOME INSTITUTE AT SHENZHEN, CHINESE ACADEMY OF AGRICULTURAL SCIENCES	public	fastq,sra	SRX4581420	HiSeq X Ten	PAIRED	cDNA	TRANSCRIPTOMIC	Sus scrofa	LE65_3	SRP158448	300	15654025200	LE65_3	Landrace	female
SRR7724862	PRJNA486202	Skeletal muscle	2019-09-08T00:00:00Z	RNA-Seq	SAMN09840099	6501785101	15273269400	Skeletal muscle	AGRICULTURAL GENOME INSTITUTE AT SHENZHEN, CHINESE ACADEMY OF AGRICULTURAL SCIENCES	public	fastq,sra	SRX4581419	HiSeq X Ten	PAIRED	cDNA	TRANSCRIPTOMIC	Sus scrofa	LE70_1	SRP158448	300	15273269400	LE70_1	Landrace	female
SRR7724863	PRJNA486202	Skeletal muscle	2019-09-08T00:00:00Z	RNA-Seq	SAMN09840100	6191335476	15083156700	Skeletal muscle	AGRICULTURAL GENOME INSTITUTE AT SHENZHEN, CHINESE ACADEMY OF AGRICULTURAL SCIENCES	public	sra,fastq	SRX4581418	HiSeq X Ten	PAIRED	cDNA	TRANSCRIPTOMIC	Sus scrofa	LE70_2	SRP158448	300	15083156700	LE70_2	Landrace	female
SRR7724864	PRJNA486202	Skeletal muscle	2019-09-08T00:00:00Z	RNA-Seq	SAMN09840101	6272024528	15245485200	Skeletal muscle	AGRICULTURAL GENOME INSTITUTE AT SHENZHEN, CHINESE ACADEMY OF AGRICULTURAL SCIENCES	public	fastq,sra	SRX4581417	HiSeq X Ten	PAIRED	cDNA	TRANSCRIPTOMIC	Sus scrofa	LE70_3	SRP158448	300	15245485200	LE70_3	Landrace	female
SRR7724865	PRJNA486202	Skeletal muscle	2019-09-08T00:00:00Z	RNA-Seq	SAMN09840124	5836638733	13457724000	Skeletal muscle	AGRICULTURAL GENOME INSTITUTE AT SHENZHEN, CHINESE ACADEMY OF AGRICULTURAL SCIENCES	public	fastq,sra	SRX4581416	HiSeq X Ten	PAIRED	cDNA	TRANSCRIPTOMIC	Sus scrofa	LD0_2	SRP158448	300	13457724000	LD0_2	Landrace	female
SRR7724866	PRJNA486202	Skeletal muscle	2019-09-08T00:00:00Z	RNA-Seq	SAMN09840125	7142879730	16604635800	Skeletal muscle	AGRICULTURAL GENOME INSTITUTE AT SHENZHEN, CHINESE ACADEMY OF AGRICULTURAL SCIENCES	public	sra,fastq	SRX4581415	HiSeq X Ten	PAIRED	cDNA	TRANSCRIPTOMIC	Sus scrofa	LD0_3	SRP158448	300	16604635800	LD0_3	Landrace	male
SRR7724867	PRJNA486202	Skeletal muscle	2019-09-08T00:00:00Z	RNA-Seq	SAMN09840110	6451610027	15881762400	Skeletal muscle	AGRICULTURAL GENOME INSTITUTE AT SHENZHEN, CHINESE ACADEMY OF AGRICULTURAL SCIENCES	public	sra,fastq	SRX4581414	HiSeq X Ten	PAIRED	cDNA	TRANSCRIPTOMIC	Sus scrofa	LE85_3	SRP158448	300	15881762400	LE85_3	Landrace	female
SRR7724868	PRJNA486202	Skeletal muscle	2019-09-08T00:00:00Z	RNA-Seq	SAMN09840123	7102396287	16619514000	Skeletal muscle	AGRICULTURAL GENOME INSTITUTE AT SHENZHEN, CHINESE ACADEMY OF AGRICULTURAL SCIENCES	public	sra,fastq	SRX4581413	HiSeq X Ten	PAIRED	cDNA	TRANSCRIPTOMIC	Sus scrofa	LD0_1	SRP158448	300	16619514000	LD0_1	Landrace	male
SRR7724869	PRJNA486202	Skeletal muscle	2019-09-08T00:00:00Z	RNA-Seq	SAMN09840106	6616342426	15377284200	Skeletal muscle	AGRICULTURAL GENOME INSTITUTE AT SHENZHEN, CHINESE ACADEMY OF AGRICULTURAL SCIENCES	public	fastq,sra	SRX4581412	HiSeq X Ten	PAIRED	cDNA	TRANSCRIPTOMIC	Sus scrofa	LE80_2	SRP158448	300	15377284200	LE80_2	Landrace	male
SRR7724870	PRJNA486202	Skeletal muscle	2019-09-08T00:00:00Z	RNA-Seq	SAMN09840107	6748836928	15566553300	Skeletal muscle	AGRICULTURAL GENOME INSTITUTE AT SHENZHEN, CHINESE ACADEMY OF AGRICULTURAL SCIENCES	public	sra,fastq	SRX4581411	HiSeq X Ten	PAIRED	cDNA	TRANSCRIPTOMIC	Sus scrofa	LE80_3	SRP158448	300	15566553300	LE80_3	Landrace	female
SRR7724871	PRJNA486202	Skeletal muscle	2019-09-08T00:00:00Z	RNA-Seq	SAMN09840118	6106107350	13151444700	Skeletal muscle	AGRICULTURAL GENOME INSTITUTE AT SHENZHEN, CHINESE ACADEMY OF AGRICULTURAL SCIENCES	public	sra,fastq	SRX4581410	HiSeq X Ten	PAIRED	cDNA	TRANSCRIPTOMIC	Sus scrofa	LE100_2	SRP158448	300	13151444700	LE100_2	Landrace	female
SRR7724900	PRJNA486202	Skeletal muscle	2019-09-08T00:00:00Z	RNA-Seq	SAMN09840094	7499641250	15919573800	Skeletal muscle	AGRICULTURAL GENOME INSTITUTE AT SHENZHEN, CHINESE ACADEMY OF AGRICULTURAL SCIENCES	public	fastq,sra	SRX4581381	HiSeq X Ten	PAIRED	cDNA	TRANSCRIPTOMIC	Sus scrofa	LE60_2	SRP158448	300	15919573800	LE60_2	Landrace	male
SRR7724901	PRJNA486202	Skeletal muscle	2019-09-08T00:00:00Z	RNA-Seq	SAMN09840097	6324787002	14451099900	Skeletal muscle	AGRICULTURAL GENOME INSTITUTE AT SHENZHEN, CHINESE ACADEMY OF AGRICULTURAL SCIENCES	public	fastq,sra	SRX4581380	HiSeq X Ten	PAIRED	cDNA	TRANSCRIPTOMIC	Sus scrofa	LE65_2	SRP158448	300	14451099900	LE65_2	Landrace	male
SRR7724902	PRJNA486202	Skeletal muscle	2019-09-08T00:00:00Z	RNA-Seq	SAMN09840096	6635703930	15055515300	Skeletal muscle	AGRICULTURAL GENOME INSTITUTE AT SHENZHEN, CHINESE ACADEMY OF AGRICULTURAL SCIENCES	public	fastq,sra	SRX4581379	HiSeq X Ten	PAIRED	cDNA	TRANSCRIPTOMIC	Sus scrofa	LE65_1	SRP158448	300	15055515300	LE65_1	Landrace	male
SRR7724903	PRJNA486202	Skeletal muscle	2019-09-08T00:00:00Z	RNA-Seq	SAMN09840109	6757149049	16357552500	Skeletal muscle	AGRICULTURAL GENOME INSTITUTE AT SHENZHEN, CHINESE ACADEMY OF AGRICULTURAL SCIENCES	public	fastq,sra	SRX4581378	HiSeq X Ten	PAIRED	cDNA	TRANSCRIPTOMIC	Sus scrofa	LE85_2	SRP158448	300	16357552500	LE85_2	Landrace	female
SRR7724904	PRJNA486202	Skeletal muscle	2019-09-08T00:00:00Z	RNA-Seq	SAMN09840108	7465578595	17035758600	Skeletal muscle	AGRICULTURAL GENOME INSTITUTE AT SHENZHEN, CHINESE ACADEMY OF AGRICULTURAL SCIENCES	public	fastq,sra	SRX4581377	HiSeq X Ten	PAIRED	cDNA	TRANSCRIPTOMIC	Sus scrofa	LE85_1	SRP158448	300	17035758600	LE85_1	Landrace	male
SRR7724905	PRJNA486202	Skeletal muscle	2019-09-08T00:00:00Z	RNA-Seq	SAMN09840115	7083778679	16824731100	Skeletal muscle	AGRICULTURAL GENOME INSTITUTE AT SHENZHEN, CHINESE ACADEMY OF AGRICULTURAL SCIENCES	public	sra,fastq	SRX4581376	HiSeq X Ten	PAIRED	cDNA	TRANSCRIPTOMIC	Sus scrofa	LE95_2	SRP158448	300	16824731100	LE95_2	Landrace	male
SRR7724906	PRJNA486202	Skeletal muscle	2019-09-08T00:00:00Z	RNA-Seq	SAMN09840114	6843130044	16229238300	Skeletal muscle	AGRICULTURAL GENOME INSTITUTE AT SHENZHEN, CHINESE ACADEMY OF AGRICULTURAL SCIENCES	public	fastq,sra	SRX4581375	HiSeq X Ten	PAIRED	cDNA	TRANSCRIPTOMIC	Sus scrofa	LE95_1	SRP158448	300	16229238300	LE95_1	Landrace	female
SRR7724907	PRJNA486202	Skeletal muscle	2019-09-08T00:00:00Z	RNA-Seq	SAMN09840113	7004529779	16068229500	Skeletal muscle	AGRICULTURAL GENOME INSTITUTE AT SHENZHEN, CHINESE ACADEMY OF AGRICULTURAL SCIENCES	public	fastq,sra	SRX4581374	HiSeq X Ten	PAIRED	cDNA	TRANSCRIPTOMIC	Sus scrofa	LE90_3	SRP158448	300	16068229500	LE90_3	Landrace	female
SRR7724908	PRJNA486202	Skeletal muscle	2019-09-08T00:00:00Z	RNA-Seq	SAMN09840112	6365781457	15302392200	Skeletal muscle	AGRICULTURAL GENOME INSTITUTE AT SHENZHEN, CHINESE ACADEMY OF AGRICULTURAL SCIENCES	public	sra,fastq	SRX4581373	HiSeq X Ten	PAIRED	cDNA	TRANSCRIPTOMIC	Sus scrofa	LE90_2	SRP158448	300	15302392200	LE90_2	Landrace	male
SRR7724909	PRJNA486202	Skeletal muscle	2019-09-08T00:00:00Z	RNA-Seq	SAMN09840155	7931903719	18426484200	Skeletal muscle	AGRICULTURAL GENOME INSTITUTE AT SHENZHEN, CHINESE ACADEMY OF AGRICULTURAL SCIENCES	public	sra,fastq	SRX4581372	HiSeq X Ten	PAIRED	cDNA	TRANSCRIPTOMIC	Sus scrofa	LD160_3	SRP158448	300	18426484200	LD160_3	Landrace	male
SRR7724910	PRJNA486202	Skeletal muscle	2019-09-08T00:00:00Z	RNA-Seq	SAMN09840154	5765635980	13158576600	Skeletal muscle	AGRICULTURAL GENOME INSTITUTE AT SHENZHEN, CHINESE ACADEMY OF AGRICULTURAL SCIENCES	public	sra,fastq	SRX4581371	HiSeq X Ten	PAIRED	cDNA	TRANSCRIPTOMIC	Sus scrofa	LD160_2	SRP158448	300	13158576600	LD160_2	Landrace	male
SRR7724911	PRJNA486202	Skeletal muscle	2019-09-08T00:00:00Z	RNA-Seq	SAMN09840153	6983245989	16873164900	Skeletal muscle	AGRICULTURAL GENOME INSTITUTE AT SHENZHEN, CHINESE ACADEMY OF AGRICULTURAL SCIENCES	public	fastq,sra	SRX4581370	HiSeq X Ten	PAIRED	cDNA	TRANSCRIPTOMIC	Sus scrofa	LD160_1	SRP158448	300	16873164900	LD160_1	Landrace	female
SRR7724912	PRJNA486202	Skeletal muscle	2019-09-08T00:00:00Z	RNA-Seq	SAMN09840152	5875014019	13443346200	Skeletal muscle	AGRICULTURAL GENOME INSTITUTE AT SHENZHEN, CHINESE ACADEMY OF AGRICULTURAL SCIENCES	public	sra,fastq	SRX4581369	HiSeq X Ten	PAIRED	cDNA	TRANSCRIPTOMIC	Sus scrofa	LD140_3	SRP158448	300	13443346200	LD140_3	Landrace	male
SRR7724913	PRJNA486202	Skeletal muscle	2019-09-08T00:00:00Z	RNA-Seq	SAMN09840151	6437236617	15432245700	Skeletal muscle	AGRICULTURAL GENOME INSTITUTE AT SHENZHEN, CHINESE ACADEMY OF AGRICULTURAL SCIENCES	public	fastq,sra	SRX4581368	HiSeq X Ten	PAIRED	cDNA	TRANSCRIPTOMIC	Sus scrofa	LD140_2	SRP158448	300	15432245700	LD140_2	Landrace	female
SRR7724914	PRJNA486202	Skeletal muscle	2019-09-08T00:00:00Z	RNA-Seq	SAMN09840150	5738156034	13849907700	Skeletal muscle	AGRICULTURAL GENOME INSTITUTE AT SHENZHEN, CHINESE ACADEMY OF AGRICULTURAL SCIENCES	public	sra,fastq	SRX4581367	HiSeq X Ten	PAIRED	cDNA	TRANSCRIPTOMIC	Sus scrofa	LD140_1	SRP158448	300	13849907700	LD140_1	Landrace	male
SRR7724915	PRJNA486202	Skeletal muscle	2019-09-08T00:00:00Z	RNA-Seq	SAMN09840149	5287467186	12093852600	Skeletal muscle	AGRICULTURAL GENOME INSTITUTE AT SHENZHEN, CHINESE ACADEMY OF AGRICULTURAL SCIENCES	public	sra,fastq	SRX4581366	HiSeq X Ten	PAIRED	cDNA	TRANSCRIPTOMIC	Sus scrofa	LD120_3	SRP158448	300	12093852600	LD120_3	Landrace	male
SRR7724916	PRJNA486202	Skeletal muscle	2019-09-08T00:00:00Z	RNA-Seq	SAMN09840148	6608977161	15194269500	Skeletal muscle	AGRICULTURAL GENOME INSTITUTE AT SHENZHEN, CHINESE ACADEMY OF AGRICULTURAL SCIENCES	public	fastq,sra	SRX4581365	HiSeq X Ten	PAIRED	cDNA	TRANSCRIPTOMIC	Sus scrofa	LD120_2	SRP158448	300	15194269500	LD120_2	Landrace	male
SRR7724917	PRJNA486202	Skeletal muscle	2019-09-08T00:00:00Z	RNA-Seq	SAMN09840144	6079622446	14585969400	Skeletal muscle	AGRICULTURAL GENOME INSTITUTE AT SHENZHEN, CHINESE ACADEMY OF AGRICULTURAL SCIENCES	public	fastq,sra	SRX4581364	HiSeq X Ten	PAIRED	cDNA	TRANSCRIPTOMIC	Sus scrofa	LD100_1	SRP158448	300	14585969400	LD100_1	Landrace	female
SRR7724918	PRJNA486202	Skeletal muscle	2019-09-08T00:00:00Z	RNA-Seq	SAMN09840128	5944552031	14587098900	Skeletal muscle	AGRICULTURAL GENOME INSTITUTE AT SHENZHEN, CHINESE ACADEMY OF AGRICULTURAL SCIENCES	public	fastq,sra	SRX4581363	HiSeq X Ten	PAIRED	cDNA	TRANSCRIPTOMIC	Sus scrofa	LD9_3	SRP158448	300	14587098900	LD9_3	Landrace	male
SRR7724919	PRJNA486202	Skeletal muscle	2019-09-08T00:00:00Z	RNA-Seq	SAMN09840157	6481506208	15205109100	Skeletal muscle	AGRICULTURAL GENOME INSTITUTE AT SHENZHEN, CHINESE ACADEMY OF AGRICULTURAL SCIENCES	public	sra,fastq	SRX4581362	HiSeq X Ten	PAIRED	cDNA	TRANSCRIPTOMIC	Sus scrofa	LD180_2	SRP158448	300	15205109100	LD180_2	Landrace	male
SRR7724920	PRJNA486202	Skeletal muscle	2019-09-08T00:00:00Z	RNA-Seq	SAMN09840156	5744580529	13814775900	Skeletal muscle	AGRICULTURAL GENOME INSTITUTE AT SHENZHEN, CHINESE ACADEMY OF AGRICULTURAL SCIENCES	public	sra,fastq	SRX4581361	HiSeq X Ten	PAIRED	cDNA	TRANSCRIPTOMIC	Sus scrofa	LD180_1	SRP158448	300	13814775900	LD180_1	Landrace	female
SRR7724921	PRJNA486202	Skeletal muscle	2019-09-08T00:00:00Z	RNA-Seq	SAMN09840117	6646206911	14158470900	Skeletal muscle	AGRICULTURAL GENOME INSTITUTE AT SHENZHEN, CHINESE ACADEMY OF AGRICULTURAL SCIENCES	public	fastq,sra	SRX4581360	HiSeq X Ten	PAIRED	cDNA	TRANSCRIPTOMIC	Sus scrofa	LE100_1	SRP158448	300	14158470900	LE100_1	Landrace	female
SRR7724922	PRJNA486202	Skeletal muscle	2019-09-08T00:00:00Z	RNA-Seq	SAMN09840132	6344356453	14400510900	Skeletal muscle	AGRICULTURAL GENOME INSTITUTE AT SHENZHEN, CHINESE ACADEMY OF AGRICULTURAL SCIENCES	public	sra,fastq	SRX4581359	HiSeq X Ten	PAIRED	cDNA	TRANSCRIPTOMIC	Sus scrofa	LD30_1	SRP158448	300	14400510900	LD30_1	Landrace	male
SRR7724923	PRJNA486202	Skeletal muscle	2019-09-08T00:00:00Z	RNA-Seq	SAMN09840116	6797646546	16385576400	Skeletal muscle	AGRICULTURAL GENOME INSTITUTE AT SHENZHEN, CHINESE ACADEMY OF AGRICULTURAL SCIENCES	public	sra,fastq	SRX4581358	HiSeq X Ten	PAIRED	cDNA	TRANSCRIPTOMIC	Sus scrofa	LE95_3	SRP158448	300	16385576400	LE95_3	Landrace	male
SRR7724924	PRJNA486202	Skeletal muscle	2019-09-08T00:00:00Z	RNA-Seq	SAMN09840111	7328905806	16836471000	Skeletal muscle	AGRICULTURAL GENOME INSTITUTE AT SHENZHEN, CHINESE ACADEMY OF AGRICULTURAL SCIENCES	public	fastq,sra	SRX4581357	HiSeq X Ten	PAIRED	cDNA	TRANSCRIPTOMIC	Sus scrofa	LE90_1	SRP158448	300	16836471000	LE90_1	Landrace	male
SRR7724925	PRJNA486202	Skeletal muscle	2019-09-08T00:00:00Z	RNA-Seq	SAMN09840136	5944894082	13861878300	Skeletal muscle	AGRICULTURAL GENOME INSTITUTE AT SHENZHEN, CHINESE ACADEMY OF AGRICULTURAL SCIENCES	public	sra,fastq	SRX4581356	HiSeq X Ten	PAIRED	cDNA	TRANSCRIPTOMIC	Sus scrofa	LD40_2	SRP158448	300	13861878300	LD40_2	Landrace	female
SRR11939210	PRJNA637678	Ovary	2021-04-20T00:00:00Z	RNA-Seq	SAMN15150295	6432138824	15055551600	Ovary	SICHUAN ARGRICULTURE UNIVERSITY	public	fastq,sra	SRX8483909	HiSeq X Ten	PAIRED	RANDOM	TRANSCRIPTOMIC	Sus scrofa	Pig-Ovary-3	SRP266207	300	15055551600	Pig-Ovary-3	Rongchang pig	female		2-year-old
SRR11939211	PRJNA637678	Ovary	2021-04-20T00:00:00Z	RNA-Seq	SAMN15150294	6457629678	15086076300	Ovary	SICHUAN ARGRICULTURE UNIVERSITY	public	fastq,sra	SRX8483908	HiSeq X Ten	PAIRED	RANDOM	TRANSCRIPTOMIC	Sus scrofa	Pig-Ovary-2	SRP266207	300	15086076300	Pig-Ovary-2	Rongchang pig	female		2-year-old
SRR11939212	PRJNA637678	Ovary	2021-04-20T00:00:00Z	RNA-Seq	SAMN15150293	7778342321	18349031400	Ovary	SICHUAN ARGRICULTURE UNIVERSITY	public	fastq,sra	SRX8483907	HiSeq X Ten	PAIRED	RANDOM	TRANSCRIPTOMIC	Sus scrofa	Pig-Ovary-1	SRP266207	300	18349031400	Pig-Ovary-1	Rongchang pig	female		2-year-old
SRR9657880	PRJNA553341	Ovary	2020-09-02T00:00:00Z	RNA-Seq	SAMN12234799	5019879370	12370355400	ovary	GEO	public	fastq,sra	SRX6419104	Illumina HiSeq X Ten	PAIRED	cDNA	TRANSCRIPTOMIC	Sus scrofa	GSM3932575	SRP213816	300	12370355400				GSM3932575	on the 14 day (day 1 = first day of estrus) after estrus as in the luteal phase
SRR9657881	PRJNA553341	Ovary	2020-09-02T00:00:00Z	RNA-Seq	SAMN12234798	6024756402	14611780800	ovary	GEO	public	sra,fastq	SRX6419105	Illumina HiSeq X Ten	PAIRED	cDNA	TRANSCRIPTOMIC	Sus scrofa	GSM3932576	SRP213816	300	14611780800				GSM3932576	on the 14 day (day 1 = first day of estrus) after estrus as in the luteal phase
SRR9657882	PRJNA553341	Ovary	2020-09-02T00:00:00Z	RNA-Seq	SAMN12234797	6648561276	15970584000	ovary	GEO	public	fastq,sra	SRX6419106	Illumina HiSeq X Ten	PAIRED	cDNA	TRANSCRIPTOMIC	Sus scrofa	GSM3932577	SRP213816	300	15970584000				GSM3932577	on the 14 day (day 1 = first day of estrus) after estrus as in the luteal phase
SRR9657883	PRJNA553341	Ovary	2020-09-02T00:00:00Z	RNA-Seq	SAMN12234795	5161314158	12807302100	ovary	GEO	public	sra,fastq	SRX6419107	Illumina HiSeq X Ten	PAIRED	cDNA	TRANSCRIPTOMIC	Sus scrofa	GSM3932578	SRP213816	300	12807302100				GSM3932578	on the 14 day (day 1 = first day of estrus) after estrus as in the luteal phase
SRR9657884	PRJNA553341	Ovary	2020-09-02T00:00:00Z	RNA-Seq	SAMN12234794	5071385250	12586707600	ovary	GEO	public	sra,fastq	SRX6419108	Illumina HiSeq X Ten	PAIRED	cDNA	TRANSCRIPTOMIC	Sus scrofa	GSM3932579	SRP213816	300	12586707600				GSM3932579	on the 14 day (day 1 = first day of estrus) after estrus as in the luteal phase
SRR9657885	PRJNA553341	Ovary	2020-09-02T00:00:00Z	RNA-Seq	SAMN12234793	5286622882	13075119900	ovary	GEO	public	fastq,sra	SRX6419109	Illumina HiSeq X Ten	PAIRED	cDNA	TRANSCRIPTOMIC	Sus scrofa	GSM3932580	SRP213816	300	13075119900				GSM3932580	on the 14 day (day 1 = first day of estrus) after estrus as in the luteal phase
SRR9657886	PRJNA553341	Ovary	2020-09-02T00:00:00Z	RNA-Seq	SAMN12234792	5314612118	13222447800	ovary	GEO	public	sra,fastq	SRX6419110	Illumina HiSeq X Ten	PAIRED	cDNA	TRANSCRIPTOMIC	Sus scrofa	GSM3932581	SRP213816	300	13222447800				GSM3932581	on the 14 day (day 1 = first day of estrus) after estrus as in the luteal phase
SRR9657887	PRJNA553341	Ovary	2020-09-02T00:00:00Z	RNA-Seq	SAMN12234791	5232646282	12816346500	ovary	GEO	public	sra,fastq	SRX6419111	Illumina HiSeq X Ten	PAIRED	cDNA	TRANSCRIPTOMIC	Sus scrofa	GSM3932582	SRP213816	300	12816346500				GSM3932582	on the 14 day (day 1 = first day of estrus) after estrus as in the luteal phase
SRR9657888	PRJNA553341	Ovary	2020-09-02T00:00:00Z	RNA-Seq	SAMN12234790	7286039380	18057635100	ovary	GEO	public	sra,fastq	SRX6419112	Illumina HiSeq X Ten	PAIRED	cDNA	TRANSCRIPTOMIC	Sus scrofa	GSM3932583	SRP213816	300	18057635100				GSM3932583	on the 20 day (day 1 = first day of estrus) after estrus as in the follicular phase
SRR9657889	PRJNA553341	Ovary	2020-09-02T00:00:00Z	RNA-Seq	SAMN12234789	5173157293	12838950300	ovary	GEO	public	fastq,sra	SRX6419113	Illumina HiSeq X Ten	PAIRED	cDNA	TRANSCRIPTOMIC	Sus scrofa	GSM3932584	SRP213816	300	12838950300				GSM3932584	on the 20 day (day 1 = first day of estrus) after estrus as in the follicular phase
SRR9657890	PRJNA553341	Ovary	2020-09-02T00:00:00Z	RNA-Seq	SAMN12234788	4830662825	11926250400	ovary	GEO	public	fastq,sra	SRX6419114	Illumina HiSeq X Ten	PAIRED	cDNA	TRANSCRIPTOMIC	Sus scrofa	GSM3932585	SRP213816	300	11926250400				GSM3932585	on the 20 day (day 1 = first day of estrus) after estrus as in the follicular phase
SRR9657892	PRJNA553341	Ovary	2020-09-02T00:00:00Z	RNA-Seq	SAMN12234786	7832062677	19471042500	ovary	GEO	public	fastq,sra	SRX6419116	Illumina HiSeq X Ten	PAIRED	cDNA	TRANSCRIPTOMIC	Sus scrofa	GSM3932587	SRP213816	300	19471042500				GSM3932587	on the 20 day (day 1 = first day of estrus) after estrus as in the follicular phase
SRR9657893	PRJNA553341	Ovary	2020-09-02T00:00:00Z	RNA-Seq	SAMN12234785	5935473924	14265625200	ovary	GEO	public	fastq,sra	SRX6419117	Illumina HiSeq X Ten	PAIRED	cDNA	TRANSCRIPTOMIC	Sus scrofa	GSM3932588	SRP213816	300	14265625200				GSM3932588	on the 20 day (day 1 = first day of estrus) after estrus as in the follicular phase
SRR9657894	PRJNA553341	Ovary	2020-09-02T00:00:00Z	RNA-Seq	SAMN12234784	5974350911	14586558600	ovary	GEO	public	sra,fastq	SRX6419118	Illumina HiSeq X Ten	PAIRED	cDNA	TRANSCRIPTOMIC	Sus scrofa	GSM3932589	SRP213816	300	14586558600				GSM3932589	on the 20 day (day 1 = first day of estrus) after estrus as in the follicular phase
SRR9657895	PRJNA553341	Ovary	2020-09-02T00:00:00Z	RNA-Seq	SAMN12234783	6011792368	14634813000	ovary	GEO	public	fastq,sra	SRX6419119	Illumina HiSeq X Ten	PAIRED	cDNA	TRANSCRIPTOMIC	Sus scrofa	GSM3932590	SRP213816	300	14634813000				GSM3932590	on the 20 day (day 1 = first day of estrus) after estrus as in the follicular phase
SRR2537255	PRJNA297376	Ovary	2017-06-12T00:00:00Z	RNA-Seq	SAMN04123125	4049001940	9846322500	ovary	GEO	public	fastq,sra	SRX1295813	Illumina HiSeq 2500	PAIRED	cDNA	TRANSCRIPTOMIC	Sus scrofa	GSM1898696	SRP064327	250	9846322500		Large White		GSM1898696
SRR11968740	PRJNA638407	Gallbladder	2020-10-28T00:00:00Z	RNA-Seq	SAMN15192102	5826736106	15865634628	gallbladder	GEO	public	sra,fastq	SRX8512529	Illumina HiSeq 4000	PAIRED	cDNA	TRANSCRIPTOMIC	Sus scrofa	GSM4604843	SRP266650	302	15865634628				GSM4604843	newborn
SRR11968741	PRJNA638407	Gallbladder	2020-10-28T00:00:00Z	RNA-Seq	SAMN15192102	5888276374	15811651222	gallbladder	GEO	public	sra,fastq	SRX8512529	Illumina HiSeq 4000	PAIRED	cDNA	TRANSCRIPTOMIC	Sus scrofa	GSM4604843	SRP266650	302	15811651222				GSM4604843	newborn
SRR11968742	PRJNA638407	Gallbladder	2020-10-28T00:00:00Z	RNA-Seq	SAMN15192101	5519854432	14942482538	gallbladder	GEO	public	sra,fastq	SRX8512530	Illumina HiSeq 4000	PAIRED	cDNA	TRANSCRIPTOMIC	Sus scrofa	GSM4604844	SRP266650	302	14942482538				GSM4604844	newborn
SRR11968743	PRJNA638407	Gallbladder	2020-10-28T00:00:00Z	RNA-Seq	SAMN15192101	5565966562	14870177698	gallbladder	GEO	public	sra,fastq	SRX8512530	Illumina HiSeq 4000	PAIRED	cDNA	TRANSCRIPTOMIC	Sus scrofa	GSM4604844	SRP266650	302	14870177698				GSM4604844	newborn
SRR11968744	PRJNA638407	Gallbladder	2020-10-28T00:00:00Z	RNA-Seq	SAMN15192100	5468390436	14981454128	gallbladder	GEO	public	sra,fastq	SRX8512531	Illumina HiSeq 4000	PAIRED	cDNA	TRANSCRIPTOMIC	Sus scrofa	GSM4604845	SRP266650	302	14981454128				GSM4604845	newborn
SRR11968745	PRJNA638407	Gallbladder	2020-10-28T00:00:00Z	RNA-Seq	SAMN15192100	5521852107	14921019700	gallbladder	GEO	public	sra,fastq	SRX8512531	Illumina HiSeq 4000	PAIRED	cDNA	TRANSCRIPTOMIC	Sus scrofa	GSM4604845	SRP266650	302	14921019700				GSM4604845	newborn
SRR11968746	PRJNA638407	Gallbladder	2020-10-28T00:00:00Z	RNA-Seq	SAMN15192112	5029319668	13855248412	gallbladder	GEO	public	fastq,sra	SRX8512532	Illumina HiSeq 4000	PAIRED	cDNA	TRANSCRIPTOMIC	Sus scrofa	GSM4604846	SRP266650	302	13855248412				GSM4604846	newborn
SRR11968747	PRJNA638407	Gallbladder	2020-10-28T00:00:00Z	RNA-Seq	SAMN15192112	5081288474	13793597226	gallbladder	GEO	public	sra,fastq	SRX8512532	Illumina HiSeq 4000	PAIRED	cDNA	TRANSCRIPTOMIC	Sus scrofa	GSM4604846	SRP266650	302	13793597226				GSM4604846	newborn
SRR11968748	PRJNA638407	Gallbladder	2020-10-28T00:00:00Z	RNA-Seq	SAMN15192111	5312928899	14534794316	gallbladder	GEO	public	sra,fastq	SRX8512533	Illumina HiSeq 4000	PAIRED	cDNA	TRANSCRIPTOMIC	Sus scrofa	GSM4604847	SRP266650	302	14534794316				GSM4604847	newborn
SRR11968749	PRJNA638407	Gallbladder	2020-10-28T00:00:00Z	RNA-Seq	SAMN15192111	5358063765	14454658314	gallbladder	GEO	public	sra,fastq	SRX8512533	Illumina HiSeq 4000	PAIRED	cDNA	TRANSCRIPTOMIC	Sus scrofa	GSM4604847	SRP266650	302	14454658314				GSM4604847	newborn
SRR11968750	PRJNA638407	Gallbladder	2020-10-28T00:00:00Z	RNA-Seq	SAMN15192110	4890654230	13518872658	gallbladder	GEO	public	fastq,sra	SRX8512534	Illumina HiSeq 4000	PAIRED	cDNA	TRANSCRIPTOMIC	Sus scrofa	GSM4604848	SRP266650	302	13518872658				GSM4604848	newborn
SRR11968751	PRJNA638407	Gallbladder	2020-10-28T00:00:00Z	RNA-Seq	SAMN15192110	4941097965	13459864274	gallbladder	GEO	public	sra,fastq	SRX8512534	Illumina HiSeq 4000	PAIRED	cDNA	TRANSCRIPTOMIC	Sus scrofa	GSM4604848	SRP266650	302	13459864274				GSM4604848	newborn
SRR11968752	PRJNA638407	Gallbladder	2020-10-28T00:00:00Z	RNA-Seq	SAMN15192109	5685874820	15789703674	gallbladder	GEO	public	fastq,sra	SRX8512535	Illumina HiSeq 4000	PAIRED	cDNA	TRANSCRIPTOMIC	Sus scrofa	GSM4604849	SRP266650	302	15789703674				GSM4604849	newborn
SRR11968753	PRJNA638407	Gallbladder	2020-10-28T00:00:00Z	RNA-Seq	SAMN15192109	5751289083	15736682138	gallbladder	GEO	public	sra,fastq	SRX8512535	Illumina HiSeq 4000	PAIRED	cDNA	TRANSCRIPTOMIC	Sus scrofa	GSM4604849	SRP266650	302	15736682138				GSM4604849	newborn
SRR11968754	PRJNA638407	Gallbladder	2020-10-28T00:00:00Z	RNA-Seq	SAMN15192108	5214083022	14438889384	gallbladder	GEO	public	sra,fastq	SRX8512536	Illumina HiSeq 4000	PAIRED	cDNA	TRANSCRIPTOMIC	Sus scrofa	GSM4604850	SRP266650	302	14438889384				GSM4604850	newborn
SRR11968755	PRJNA638407	Gallbladder	2020-10-28T00:00:00Z	RNA-Seq	SAMN15192108	5271431255	14385764866	gallbladder	GEO	public	sra,fastq	SRX8512536	Illumina HiSeq 4000	PAIRED	cDNA	TRANSCRIPTOMIC	Sus scrofa	GSM4604850	SRP266650	302	14385764866				GSM4604850	newborn
SRR11526914	PRJNA612825	Endocrine brain	2021-04-30T00:00:00Z	RNA-Seq	SAMN14401434	6418862777	15649877100	Pituitary gland	CHINESE ACADEMY OF AGRICULTURAL SCIENCES	public	fastq,sra	SRX8098086	Illumina HiSeq 2000	PAIRED	cDNA	TRANSCRIPTOMIC	Sus scrofa	Y30-3PG-Rep3	SRP256022	300	15649877100	Y30_3PG-Rep3	Large Write	female		30day
SRR11526916	PRJNA612825	Endocrine brain	2021-04-30T00:00:00Z	RNA-Seq	SAMN14401433	7256563160	17474730900	Pituitary gland	CHINESE ACADEMY OF AGRICULTURAL SCIENCES	public	fastq,sra	SRX8098084	Illumina HiSeq 2000	PAIRED	cDNA	TRANSCRIPTOMIC	Sus scrofa	Y30-2PG-Rep2	SRP256022	300	17474730900	Y30_2PG-Rep2	Large Write	female		30day
SRR11526917	PRJNA612825	Endocrine brain	2021-04-30T00:00:00Z	RNA-Seq	SAMN14401432	6818256275	16860550200	Pituitary gland	CHINESE ACADEMY OF AGRICULTURAL SCIENCES	public	sra,fastq	SRX8098083	Illumina HiSeq 2000	PAIRED	cDNA	TRANSCRIPTOMIC	Sus scrofa	Y30-1PG-Rep1	SRP256022	300	16860550200	Y30_1PG-Rep1	Large Write	female		30day
SRR11526936	PRJNA612825	Endocrine brain	2021-04-30T00:00:00Z	RNA-Seq	SAMN14401415	5089400164	14032856100	Pituitary gland	CHINESE ACADEMY OF AGRICULTURAL SCIENCES	public	sra,fastq	SRX8098064	Illumina HiSeq 2000	PAIRED	cDNA	TRANSCRIPTOMIC	Sus scrofa	M300-3PG-Rep3	SRP256022	300	14032856100	M300_3PG-Rep3	Meishan	female		300day
SRR11526939	PRJNA612825	Endocrine brain	2021-04-30T00:00:00Z	RNA-Seq	SAMN14401413	5714614294	15252329700	Pituitary gland	CHINESE ACADEMY OF AGRICULTURAL SCIENCES	public	sra,fastq	SRX8098061	Illumina HiSeq 2000	PAIRED	cDNA	TRANSCRIPTOMIC	Sus scrofa	M300-1PG-Rep1	SRP256022	300	15252329700	M300_1PG-Rep1	Meishan	female		300day
SRR11526963	PRJNA612825	Endocrine brain	2021-04-30T00:00:00Z	RNA-Seq	SAMN14401394	5585041790	15044650200	Pituitary gland	CHINESE ACADEMY OF AGRICULTURAL SCIENCES	public	sra,fastq	SRX8098037	Illumina HiSeq 2000	PAIRED	cDNA	TRANSCRIPTOMIC	Sus scrofa	M180-3PG-Rep3	SRP256022	300	15044650200	M180_3PG-Rep3	Meishan	female		180day
SRR11526964	PRJNA612825	Endocrine brain	2021-04-30T00:00:00Z	RNA-Seq	SAMN14401393	6379710520	14372373900	Pituitary gland	CHINESE ACADEMY OF AGRICULTURAL SCIENCES	public	sra,fastq	SRX8098036	Illumina HiSeq 2000	PAIRED	cDNA	TRANSCRIPTOMIC	Sus scrofa	M180-2PG-Rep2	SRP256022	300	14372373900	M180_2PG-Rep2	Meishan	female		180day
SRR11526965	PRJNA612825	Endocrine brain	2021-04-30T00:00:00Z	RNA-Seq	SAMN14401392	5978455829	14240783400	Pituitary gland	CHINESE ACADEMY OF AGRICULTURAL SCIENCES	public	fastq,sra	SRX8098035	Illumina HiSeq 2000	PAIRED	cDNA	TRANSCRIPTOMIC	Sus scrofa	M180-1PG-Rep1	SRP256022	300	14240783400	M180_1PG-Rep1	Meishan	female		180day
SRR11526986	PRJNA612825	Endocrine brain	2021-04-30T00:00:00Z	RNA-Seq	SAMN14401373	5457985397	14010455100	Pituitary gland	CHINESE ACADEMY OF AGRICULTURAL SCIENCES	public	fastq,sra	SRX8098014	Illumina HiSeq 2000	PAIRED	cDNA	TRANSCRIPTOMIC	Sus scrofa	M30-3PG-Rep3	SRP256022	300	14010455100	M30_3PG-Rep3	Meishan	female		30day
SRR11526987	PRJNA612825	Endocrine brain	2021-04-30T00:00:00Z	RNA-Seq	SAMN14401372	5612598442	14391570600	Pituitary gland	CHINESE ACADEMY OF AGRICULTURAL SCIENCES	public	fastq,sra	SRX8098013	Illumina HiSeq 2000	PAIRED	cDNA	TRANSCRIPTOMIC	Sus scrofa	M30-2PG-Rep2	SRP256022	300	14391570600	M30_2PG-Rep2	Meishan	female		30day
SRR11526988	PRJNA612825	Endocrine brain	2021-04-30T00:00:00Z	RNA-Seq	SAMN14401371	5474122643	13882129500	Pituitary gland	CHINESE ACADEMY OF AGRICULTURAL SCIENCES	public	sra,fastq	SRX8098012	Illumina HiSeq 2000	PAIRED	cDNA	TRANSCRIPTOMIC	Sus scrofa	M30-1PG-Rep1	SRP256022	300	13882129500	M30_1PG-Rep1	Meishan	female		30day
SRR11527002	PRJNA612825	Endocrine brain	2021-04-30T00:00:00Z	RNA-Seq	SAMN14401476	7101047718	17049911400	Pituitary gland	CHINESE ACADEMY OF AGRICULTURAL SCIENCES	public	sra,fastq	SRX8097998	Illumina HiSeq 2000	PAIRED	cDNA	TRANSCRIPTOMIC	Sus scrofa	Y300-3PG-Rep3	SRP256022	300	17049911400	Y300_3PG-Rep3	Large Write	female		300day
SRR11527003	PRJNA612825	Endocrine brain	2021-04-30T00:00:00Z	RNA-Seq	SAMN14401475	5771661135	13870360800	Pituitary gland	CHINESE ACADEMY OF AGRICULTURAL SCIENCES	public	fastq,sra	SRX8097997	Illumina HiSeq 2000	PAIRED	cDNA	TRANSCRIPTOMIC	Sus scrofa	Y300-2PG-Rep2	SRP256022	300	13870360800	Y300_2PG-Rep2	Large Write	female		300day
SRR11527004	PRJNA612825	Endocrine brain	2021-04-30T00:00:00Z	RNA-Seq	SAMN14401474	5412574758	13134189000	Pituitary gland	CHINESE ACADEMY OF AGRICULTURAL SCIENCES	public	fastq,sra	SRX8097996	Illumina HiSeq 2000	PAIRED	cDNA	TRANSCRIPTOMIC	Sus scrofa	Y300-1PG-Rep1	SRP256022	300	13134189000	Y300_1PG-Rep1	Large Write	female		300day
SRR11527029	PRJNA612825	Endocrine brain	2021-04-30T00:00:00Z	RNA-Seq	SAMN14401455	5816267868	14079086700	Pituitary gland	CHINESE ACADEMY OF AGRICULTURAL SCIENCES	public	sra,fastq	SRX8097971	Illumina HiSeq 2000	PAIRED	cDNA	TRANSCRIPTOMIC	Sus scrofa	Y180-3PG-Rep3	SRP256022	300	14079086700	Y180_3PG-Rep3	Large Write	female		180day
SRR11527030	PRJNA612825	Endocrine brain	2021-04-30T00:00:00Z	RNA-Seq	SAMN14401454	6502832625	15802168500	Pituitary gland	CHINESE ACADEMY OF AGRICULTURAL SCIENCES	public	sra,fastq	SRX8097970	Illumina HiSeq 2000	PAIRED	cDNA	TRANSCRIPTOMIC	Sus scrofa	Y180-2PG-Rep2	SRP256022	300	15802168500	Y180_2PG-Rep2	Large Write	female		180day
SRR11527032	PRJNA612825	Endocrine brain	2021-04-30T00:00:00Z	RNA-Seq	SAMN14401453	5768823933	13988373900	Pituitary gland	CHINESE ACADEMY OF AGRICULTURAL SCIENCES	public	fastq,sra	SRX8097968	Illumina HiSeq 2000	PAIRED	cDNA	TRANSCRIPTOMIC	Sus scrofa	Y180-1PG-Rep1	SRP256022	300	13988373900	Y180_1PG-Rep1	Large Write	female		180day
SRR8283950	PRJNA508562	Endocrine brain	2019-04-04T00:00:00Z	RNA-Seq	SAMN10524926	4982267127	12556857600	Pineal gland	FOSHAN UNIVERSITY	public	fastq,sra	SRX5098731	Illumina HiSeq 4000	PAIRED	cDNA	TRANSCRIPTOMIC	Sus scrofa	Y300_2	SRP172576	300	12556857600	Y300_2	Largewhite	female		D300
SRR8283951	PRJNA508562	Endocrine brain	2019-04-04T00:00:00Z	RNA-Seq	SAMN10524925	7326301961	17470832700	Pineal gland	FOSHAN UNIVERSITY	public	sra,fastq	SRX5098730	Illumina HiSeq 4000	PAIRED	cDNA	TRANSCRIPTOMIC	Sus scrofa	Y300_1	SRP172576	300	17470832700	Y300_1	Largewhite	female		D300
SRR8283952	PRJNA508562	Endocrine brain	2019-04-04T00:00:00Z	RNA-Seq	SAMN10524924	7358644367	17537912700	Pineal gland	FOSHAN UNIVERSITY	public	fastq,sra	SRX5098729	Illumina HiSeq 4000	PAIRED	cDNA	TRANSCRIPTOMIC	Sus scrofa	Y180_3	SRP172576	300	17537912700	Y180_3	Largewhite	female		D180
SRR8283953	PRJNA508562	Endocrine brain	2019-04-04T00:00:00Z	RNA-Seq	SAMN10524923	6964764320	16757262300	Pineal gland	FOSHAN UNIVERSITY	public	sra,fastq	SRX5098728	Illumina HiSeq 4000	PAIRED	cDNA	TRANSCRIPTOMIC	Sus scrofa	Y180_2	SRP172576	300	16757262300	Y180_2	Largewhite	female		D180
SRR8283954	PRJNA508562	Endocrine brain	2019-04-04T00:00:00Z	RNA-Seq	SAMN10524922	6853207218	16149608400	Pineal gland	FOSHAN UNIVERSITY	public	sra,fastq	SRX5098727	Illumina HiSeq 4000	PAIRED	cDNA	TRANSCRIPTOMIC	Sus scrofa	Y180_1	SRP172576	300	16149608400	Y180_1	Largewhite	female		D180
SRR8283955	PRJNA508562	Endocrine brain	2019-04-04T00:00:00Z	RNA-Seq	SAMN10524921	7468574702	17576946300	Pineal gland	FOSHAN UNIVERSITY	public	sra,fastq	SRX5098726	Illumina HiSeq 4000	PAIRED	cDNA	TRANSCRIPTOMIC	Sus scrofa	Y90_3	SRP172576	300	17576946300	Y90_3	Largewhite	female		D30
SRR8283956	PRJNA508562	Endocrine brain	2019-04-04T00:00:00Z	RNA-Seq	SAMN10524920	6589631344	15238993500	Pineal gland	FOSHAN UNIVERSITY	public	sra,fastq	SRX5098725	Illumina HiSeq 4000	PAIRED	cDNA	TRANSCRIPTOMIC	Sus scrofa	Y90_2	SRP172576	300	15238993500	Y90_2	Largewhite	female		D30
SRR8283957	PRJNA508562	Endocrine brain	2019-04-04T00:00:00Z	RNA-Seq	SAMN10524919	6899504628	16214861400	Pineal gland	FOSHAN UNIVERSITY	public	fastq,sra	SRX5098724	Illumina HiSeq 4000	PAIRED	cDNA	TRANSCRIPTOMIC	Sus scrofa	Y90_1	SRP172576	300	16214861400	Y90_1	Largewhite	female		D30
SRR8283958	PRJNA508562	Endocrine brain	2019-04-04T00:00:00Z	RNA-Seq	SAMN10524927	6965914272	16215438300	Pineal gland	FOSHAN UNIVERSITY	public	sra,fastq	SRX5098723	Illumina HiSeq 4000	PAIRED	cDNA	TRANSCRIPTOMIC	Sus scrofa	Y300_3	SRP172576	300	16215438300	Y300_3	Largewhite	female		D300

## Sheet: Table S2
Table S2.The circRNAs detected by CIRI and find_cir
find_cir	CIRI	Both
14:56719227|56726861	1:128198|132692	1:128198|132692
8:70193530|70204678	1:593018|598149	1:593018|598149
1:145606820|145638870	1:593018|611340	1:593018|611340
7:113349922|113358807	1:593018|619011	1:593018|619011
4:81428829|81434805	1:641934|653683	1:641934|653683
1:114334827|114360879	1:1600087|1620039	1:1600087|1620039
1:112996635|113013582	1:1639166|1663793	1:1639166|1663793
12:17021695|17021876	1:1654692|1663793	1:1654692|1663793
12:56464310|56507271	1:1657903|1663793	1:1657903|1663793
16:54199616|54206085	1:4775755|4843415	1:4775755|4843415
10:65244719|65247076	1:6951212|6962994	1:6951212|6962994
8:76607805|76609327	1:7117529|7166248	1:7117529|7166248
9:87806993|87840517	1:7593401|7598966	1:7593401|7598966
4:32768217|32772484	1:7594612|7598381	1:7594612|7598381
7:50849613|50862177	1:7594612|7599773	1:7594612|7599773
5:11842157|11842381	1:7635186|7642879	1:7635186|7642879
1:107414915|107415140	1:8010483|8029183	1:8010483|8029183
13:77368876|77445610	1:8586433|8598060	1:8586433|8598060
17:5444093|5451779	1:8822877|8825081	1:8822877|8825081
10:25765895|25773920	1:9191141|9195425	1:9191141|9195425
6:34743079|34755027	1:9368795|9390184	1:9893445|9923857
13:13972826|13987364	1:9893445|9923857	1:9893445|9976196
3:131407882|131420474	1:9893445|9976196	1:10070672|10099544
18:29451053|29451551	1:10070672|10099544	1:10099395|10175846
6:28711467|28714979	1:10070672|10175846	1:12041132|12043885
5:85222902|85254704	1:10099395|10175846	1:12056480|12061089
7:37378756|37380454	1:12041132|12043885	1:12361987|12373696
X:87180557|87202038	1:12056480|12061089	1:14416335|14457143
6:91593753|91604006	1:12361987|12373696	1:15281913|15284758
1:158751249|158758254	1:14416335|14457143	1:15310676|15313904
6:150277437|150282983	1:14674475|14678459	1:15310676|15320349
13:74879191|74939901	1:14674475|14720460	1:16303725|16307993
5:33533423|33548748	1:14813380|14838628	1:16307508|16307993
1:203730146|203740464	1:15281913|15284758	1:16337729|16341714
10:57201061|57212680	1:15310676|15313904	1:16368499|16374414
9:98445087|98464072	1:15310676|15320349	1:16369649|16374414
12:17059589|17060678	1:16303725|16307993	1:16406041|16415727
5:21672280|21672613	1:16307508|16307993	1:16406041|16420284
9:56972613|56973685	1:16337729|16341714	1:16406041|16429248
17:50655590|50657733	1:16354443|16356103	1:16420173|16429248
12:27474893|27499620	1:16368499|16374414	1:17372568|17416764
1:200899063|200919078	1:16369649|16374414	1:18971670|19005183
9:8466879|8490931	1:16406041|16415727	1:18978280|18995804
2:82117897|82161993	1:16406041|16420284	1:18987938|18999931
13:166836891|166837551	1:16406041|16429248	1:18987938|19005183
1:83069399|83072260	1:16420173|16429248	1:20782263|20784622
7:9986990|10000624	1:17372568|17416764	1:20792929|20798556
13:133715518|133727006	1:18971670|19005183	1:20821002|20826456
4:105831070|105838577	1:18978280|18995804	1:20850878|20858213
7:86044906|86087677	1:18987938|18999931	1:20908952|20913116
12:14178158|14185034	1:18987938|19005183	1:20908952|20917634
14:41418932|41438049	1:20633122|20832449	1:21309225|21327591
8:47635845|47645123	1:20782263|20784622	1:22687199|22695713
4:38096090|38111049	1:20792929|20798556	1:22731268|22731891
1:265987650|265988965	1:20821002|20826456	1:22871764|22901667
1:218048427|218069031	1:20850878|20858213	1:22880595|22901667
1:112864944|112885058	1:20908952|20913116	1:22891664|22901667
17:38164322|38167482	1:20908952|20917634	1:25523036|25528664
9:40085035|40088267	1:21309225|21327591	1:27450521|27478260
4:106122922|106123902	1:22687199|22695713	1:27465973|27478260
6:31978481|31980100	1:22731268|22731891	1:27472676|27478260
4:82765791|82785563	1:22871764|22901667	1:28572083|28589887
14:55334691|55340019	1:22880595|22901667	1:29018351|29027965
10:50288255|50289324	1:22891664|22901667	1:31970093|31982095
10:68491183|68518239	1:25523036|25528664	1:31980772|31982095
14:105893635|105902806	1:27450521|27478260	1:32324753|32354628
AEMK02000510.1:631357|663972	1:27465973|27478260	1:32520013|32522430
10:42063516|42147610	1:27472676|27478260	1:33271334|33278592
14:71521813|71524495	1:28572083|28589887	1:33651342|33655055
7:77950751|77956163	1:29018351|29027965	1:33897609|33901143
14:45602199|45612963	1:31970093|31982095	1:35138980|35158957
8:15117329|15125114	1:31980772|31982095	1:36964151|36994867
9:6361824|6376708	1:32324753|32354628	1:40116745|40119904
12:37178174|37242733	1:32520013|32522430	1:41095324|41180922
14:63200444|63203229	1:33271334|33278592	1:43407280|43441648
3:42001403|42008301	1:33651342|33655055	1:44152202|44154573
11:67767430|67782441	1:33897609|33901143	1:44163930|44171097
15:91660148|91666425	1:35138980|35158957	1:44323601|44350272
14:62602234|62608494	1:36964151|36994867	1:44460412|44475731
8:68022433|68118948	1:40116745|40119904	1:45173524|45175282
6:84934413|84943570	1:41095324|41104343	1:45173524|45175843
1:128119613|128120765	1:41095324|41180922	1:45173524|45177436
3:23910594|23911080	1:43407280|43441648	1:45175190|45175843
9:45784065|45785898	1:44152202|44154573	1:45276145|45287487
9:10636306|10647784	1:44163930|44171097	1:49470632|49476453
13:94310914|94312044	1:44323601|44350272	1:50595626|50616972
2:28003476|28004151	1:44460412|44475731	1:50832070|50838859
1:90018062|90046759	1:45173524|45175282	1:52123108|52179177
10:12516945|12525737	1:45173524|45175843	1:52134346|52179177
9:72019123|72047231	1:45173524|45177436	1:52753551|52800752
3:19544393|19546962	1:45175190|45175843	1:53146858|53157947
X:34370906|34390918	1:45276145|45287487	1:53396207|53413955
2:73829182|73841932	1:49470632|49476453	1:53397627|53413955
8:116453737|116461295	1:49894310|49899256	1:53409338|53413955
10:24776756|24781769	1:50595626|50616972	1:54487286|54502778
14:129064959|129071734	1:50832070|50838859	1:54487286|54529700
11:33384753|33392814	1:52123108|52179177	1:54494181|54502778
12:20118352|20129339	1:52134346|52179177	1:54528562|54529700
14:101141993|101162118	1:52753551|52800752	1:54576238|54576836
8:964857|968127	1:53146858|53157947	1:55666252|55669095
8:82913302|82927163	1:53396207|53413955	1:55995701|56000362
3:101765610|101816282	1:53397627|53413955	1:56960510|56987501
14:33900585|33901817	1:53409338|53413955	1:60882053|60883394
14:110926818|110959111	1:54461976|54469709	1:65894300|65921100
13:100112406|100114169	1:54487286|54502778	1:66321461|66339064
11:21789455|21805764	1:54487286|54529700	1:66420083|66445570
2:129669693|129675119	1:54494181|54502778	1:67576479|67578266
1:137910161|137951139	1:54528562|54529700	1:67576479|67584208
4:34768971|34777538	1:54576238|54576836	1:71002780|71020948
4:79810142|79828416	1:55666252|55669095	1:72733011|72738156
13:120987445|121006776	1:55995701|56000362	1:72737792|72738156
15:109345792|109354179	1:56960510|56987501	1:72775619|72809371
9:36095331|36113740	1:60882053|60883394	1:74043728|74052367
5:68310430|68329034	1:65894300|65921100	1:74737037|74738472
10:57752327|57768401	1:66321461|66339064	1:75062347|75070781
13:32552937|32556000	1:66420083|66445570	1:75718076|75731720
5:88253163|88263425	1:67576479|67578266	1:75718076|75739270
13:2476885|2479744	1:67576479|67584208	1:75753869|75759232
6:149787537|149793831	1:71002780|71020948	1:76310990|76312578
6:53984174|53984741	1:72733011|72738156	1:76598234|76605761
1:94314527|94315177	1:72737792|72738156	1:76649382|76723195
12:60452655|60453315	1:72775619|72809371	1:76649382|76727151
9:12336522|12338953	1:74043728|74052367	1:76723120|76727151
3:69353541|69377657	1:74737037|74738472	1:76723120|76743769
1:16928596|16964137	1:75062347|75070781	1:76723120|76750287
1:269142239|269145362	1:75718076|75731720	1:77215898|77279692
10:46475198|46489651	1:75718076|75739270	1:77234825|77239878
5:65901062|65926726	1:75753869|75759232	1:77268674|77279692
9:114939349|114944875	1:76310990|76312578	1:78109183|78149434
1:230250825|230254225	1:76598234|76605761	1:78133865|78149434
13:202865202|202875571	1:76649382|76723195	1:78136844|78149434
5:16309169|16328852	1:76649382|76727151	1:78164853|78170566
6:103868047|103880556	1:76723120|76727151	1:79879036|79879318
8:38273589|38296131	1:76723120|76743769	1:79885359|79886038
7:56887760|56899229	1:76723120|76750287	1:81523695|81602040
1:100589850|100613174	1:77215898|77279692	1:82875117|82891579
9:48282059|48282998	1:77234825|77239878	1:83061356|83063345
14:20259251|20260985	1:77268674|77279692	1:83098177|83112794
7:121677177|121678628	1:78109183|78149434	1:83174465|83180536
10:31295417|31315701	1:78133865|78149434	1:83295333|83295734
9:72153385|72160471	1:78136844|78149434	1:84036049|84038578
13:32559768|32563493	1:78164853|78170566	1:84036049|84056304
15:106414678|106437731	1:79879036|79879318	1:85926481|85964180
4:34704404|34704564	1:79885359|79886038	1:87134227|87153004
14:87806080|87822845	1:81523695|81602040	1:87210273|87212987
3:107031560|107034523	1:82875117|82891579	1:90013480|90046759
2:133761975|133799873	1:83061356|83063345	1:90220788|90255853
2:141219340|141223721	1:83098177|83112794	1:90220788|90269663
14:50541082|50541547	1:83174465|83180536	1:90238341|90269663
6:147621915|147624761	1:83295333|83295734	1:90803041|90805557
8:133809206|133820070	1:84036049|84038578	1:92197244|92210238
3:41896797|41908064	1:84036049|84056304	1:94314527|94315177
1:98220113|98259964	1:85926481|85964180	1:94557868|94561324
1:179650258|179665826	1:87134227|87153004	1:95500838|95505732
14:114025269|114047475	1:87210273|87212987	1:95571669|95582063
17:11785783|11798831	1:90013480|90046759	1:95743460|95748901
14:56022255|56039599	1:90220788|90255853	1:95846715|95847499
14:42234964|42241850	1:90220788|90269663	1:96447977|96483856
15:94830414|94839646	1:90238341|90269663	1:96453516|96472730
17:38164322|38173595	1:90803041|90805557	1:96493194|96516009
13:77068767|77075075	1:92197244|92210238	1:97428775|97484275
17:17554385|17564444	1:92422667|92424540	1:97447508|97451864
1:43407280|43441648	1:94314527|94315177	1:98860451|98888929
4:111245266|111251135	1:94557868|94561324	1:98929605|98931423
8:78122833|78199258	1:95500838|95505732	1:99876556|99881810
11:25318969|25415356	1:95571669|95582063	1:100589850|100597672
15:72487205|72488421	1:95743460|95748901	1:100589850|100603238
1:74737037|74738472	1:95846715|95847499	1:100589850|100613174
8:10406166|10415724	1:96447977|96483856	1:100589850|100626668
2:603367|606966	1:96453516|96472730	1:100589850|100626714
10:11469821|11472476	1:96493194|96516009	1:103798188|103815098
2:117419182|117427557	1:97428775|97484275	1:104748096|104774676
17:13008092|13031589	1:97447508|97451864	1:104764629|104774676
1:75718076|75739270	1:98860451|98888929	1:105987822|106000228
18:7290687|7342768	1:98929605|98931423	1:106148090|106150609
17:36469358|36470700	1:99045293|99046690	1:106150521|106171073
5:73380414|73387814	1:99876556|99881810	1:106260487|106339367
7:103654106|103664878	1:100589850|100597672	1:106664464|106665739
5:101541822|101587848	1:100589850|100603238	1:106664464|106732919
3:106380539|106443851	1:100589850|100613174	1:106711590|106732919
1:22670357|22711300	1:100589850|100626668	1:106721012|106732919
9:102780169|102781896	1:100589850|100626714	1:106917577|106921879
9:45784065|45786789	1:103798188|103815098	1:106923369|106924847
5:48589081|48638243	1:104748096|104774676	1:107028044|107030681
1:131294846|131313622	1:104764629|104774676	1:107535162|107553238
14:29592663|29611038	1:105987822|106000228	1:107552365|107553238
15:128408883|128420709	1:106148090|106150609	1:107763496|107763896
1:121211636|121239905	1:106150521|106171073	1:107957118|107967555
9:115944|121030	1:106260487|106339367	1:108257595|108268239
1:115553445|115585772	1:106664464|106665739	1:108269291|108287575
2:48999102|49002684	1:106664464|106732919	1:108385212|108386218
9:118018835|118068638	1:106711590|106732919	1:108459471|108486823
1:53409338|53413955	1:106721012|106732919	1:108482616|108486823
X:114465842|114492023	1:106917577|106921879	1:109384395|109402997
6:73137692|73172671	1:106923369|106924847	1:109947356|109963162
1:33651342|33655055	1:107028044|107030681	1:109970586|109980151
3:98064204|98077795	1:107535162|107553238	1:112996635|113013582
1:144967552|144969914	1:107552365|107553238	1:113012687|113013582
4:94313136|94324938	1:107763496|107763896	1:113097686|113102025
13:121576383|121596427	1:107957118|107967555	1:113097707|113102025
1:266567618|266575250	1:108257595|108268239	1:113097707|113113585
2:114706886|114785638	1:108269291|108287575	1:113115996|113131324
1:129597881|129602162	1:108385212|108386218	1:113128000|113128579
2:114706886|114756095	1:108459471|108486823	1:114510778|114525646
12:50074727|50080389	1:108482616|108486823	1:114737786|114740195
5:9493241|9494173	1:109384395|109402997	1:115244389|115250113
13:38531389|38545830	1:109947356|109963162	1:115244389|115263755
13:38538687|38545830	1:109970586|109980151	1:115553445|115579538
4:36943799|36957899	1:112996635|113013582	1:115553445|115585772
8:19213832|19222151	1:113012687|113013582	1:115553445|115595480
6:155709580|155724087	1:113097686|113102025	1:115575635|115595480
13:13947112|13948652	1:113097707|113102025	1:115791744|115820705
3:42886966|42934440	1:113097707|113113585	1:116401169|116427156
12:34998808|35008491	1:113115996|113131324	1:117720154|117723393
13:167824035|167842322	1:113128000|113128579	1:119147938|119152992
14:55583796|55599982	1:114510778|114525646	1:119481810|119487008
6:48422885|48424658	1:114737786|114740195	1:119487614|119500634
9:62207589|62208307	1:115244389|115250113	1:119727110|119740313
1:97428775|97484275	1:115244389|115263755	1:119735151|119740313
7:23238048|23243497	1:115553445|115579538	1:119738115|119740313
6:34512383|34518902	1:115553445|115585772	1:119871910|119905302
X:61688015|61691522	1:115553445|115595480	1:119905146|119909321
7:4574943|4584896	1:115575635|115595480	1:120176022|120185745
1:261061492|261067829	1:115791744|115820705	1:121160753|121168527
2:769790|821547	1:116401169|116427156	1:121160753|121179866
13:70400983|70406571	1:117720154|117723393	1:121192913|121197117
8:128794888|128802554	1:119147938|119152992	1:121201527|121220450
12:42579474|42579758	1:119481810|119487008	1:121213867|121216490
14:55341575|55343743	1:119487614|119500634	1:121217326|121228255
1:223585502|223596456	1:119727110|119740313	1:121217326|121230821
1:121217326|121238262	1:119735151|119740313	1:121217326|121235683
1:33867866|33901143	1:119738115|119740313	1:121217326|121238262
6:37650776|37650955	1:119871910|119905302	1:121220383|121230821
14:38475200|38479435	1:119905146|119909321	1:121330342|121335034
7:86024175|86087677	1:120176022|120185745	1:121888700|121896972
8:32109946|32110761	1:121160753|121168527	1:122494128|122514658
7:111745472|111747077	1:121160753|121179866	1:122651161|122652467
13:50461899|50471621	1:121192913|121197117	1:123607338|123626697
6:31894668|31903047	1:121201527|121220450	1:126674492|126678967
15:88591136|88593310	1:121213867|121216490	1:126678808|126689119
15:137824300|137825447	1:121217326|121228255	1:127175568|127207695
1:12361987|12373696	1:121217326|121230821	1:127195769|127196307
10:42468077|42490463	1:121217326|121235683	1:127195769|127207695
16:51178126|51183322	1:121217326|121238262	1:127746552|127748761
AEMK02000602.1:103990|104729	1:121220383|121230821	1:127998645|128008819
13:52503349|52524507	1:121330342|121335034	1:128101724|128109814
10:16499157|16510634	1:121888700|121896972	1:128372164|128373685
18:40696219|40710541	1:122494128|122514658	1:128374261|128387930
2:37193874|37201955	1:122651161|122652467	1:128401431|128418449
6:108918233|108920890	1:123607338|123626697	1:128517403|128521610
1:236521940|236522230	1:126674492|126678967	1:128629154|128630427
15:72462370|72495976	1:126678808|126689119	1:128941013|128945366
10:48820847|48824559	1:127175568|127207695	1:129062737|129078630
15:77176707|77178397	1:127195769|127196307	1:129102981|129114618
12:7709937|7720561	1:127195769|127207695	1:129597881|129602162
7:68160992|68169856	1:127746552|127748761	1:129651197|129662208
3:87251850|87262951	1:127998645|128008819	1:129659979|129662208
3:98033105|98064327	1:128101724|128109814	1:129687076|129688206
12:35952997|36034176	1:128372164|128373685	1:130233523|130242062
7:34083499|34089247	1:128374261|128387930	1:130247720|130256849
5:88253163|88273584	1:128401431|128418449	1:130247720|130278467
4:48711428|48730191	1:128517403|128521610	1:130255152|130256849
X:11431694|11448715	1:128629154|128630427	1:130264624|130278467
4:124886994|124943084	1:128941013|128945366	1:130268080|130277126
16:44259999|44265302	1:129062737|129078630	1:130275526|130277126
3:113091745|113131647	1:129102981|129114618	1:131262572|131273283
3:16486968|16487913	1:129597881|129602162	1:131294846|131313622
13:173686827|173726285	1:129651197|129662208	1:131311129|131319812
6:43879422|43894306	1:129659979|129662208	1:131326820|131340853
17:11844341|11850285	1:129687076|129688206	1:132924804|132963031
15:113311176|113327836	1:130233523|130242062	1:136157112|136164328
1:251444061|251449764	1:130247720|130256849	1:137638041|137638586
9:6361824|6374618	1:130247720|130278467	1:138468428|138472413
1:234411176|234434224	1:130255152|130256849	1:138468428|138486301
5:60297399|60309182	1:130264624|130278467	1:138471133|138472413
9:118014576|118028344	1:130268080|130277126	1:141920484|141927044
12:11098684|11119957	1:130275526|130277126	1:141920484|141983609
4:82779059|82785563	1:131262572|131273283	1:143868582|143897475
6:75647810|75648439	1:131294846|131313622	1:143953852|143960599
2:136907206|136937721	1:131311129|131319812	1:144935196|144939137
6:12085353|12085956	1:131326820|131340853	1:144947357|144956314
X:101525185|101536227	1:132924804|132963031	1:145555759|145572777
8:84588856|84590905	1:136157112|136164328	1:145568782|145572777
13:132915062|132975398	1:137638041|137638586	1:145606820|145638870
6:147509420|147536010	1:138468428|138472413	1:145634728|145638870
5:28832466|28858296	1:138468428|138486301	1:146142261|146194348
5:69698164|69699221	1:138471133|138472413	1:146154356|146194348
9:15551445|15555149	1:141920484|141927044	1:146174106|146194348
18:5720244|5721672	1:141920484|141983609	1:152700474|152737450
X:57391462|57425431	1:143868582|143897475	1:152723999|152737450
18:54393586|54404485	1:143953852|143960599	1:152738680|152751454
7:92124465|92164900	1:144935196|144939137	1:152743539|152746926
6:150578734|150591949	1:144947357|144956314	1:156324349|156377356
8:84272455|84273731	1:145555759|145572777	1:158249937|158258256
12:27298750|27312593	1:145568782|145572777	1:158261841|158264523
X:61720719|61735982	1:145606820|145638870	1:159277862|159279434
1:127991143|128008819	1:145634728|145638870	1:159341717|159350894
13:10914515|10943848	1:146142261|146194348	1:159371732|159373184
13:121798856|121802974	1:146154356|146194348	1:159390070|159390684
6:2564305|2567229	1:146174106|146194348	1:161909790|161920459
3:18293275|18295409	1:149357462|149488620	1:161909790|161924707
7:68160992|68204994	1:152700474|152737450	1:161914174|161924707
12:36458277|36461144	1:152723999|152737450	1:163013886|163020678
7:55863609|55864157	1:152738680|152751454	1:163026219|163042228
9:102513205|102526962	1:152743539|152746926	1:163184041|163189984
1:128101724|128109814	1:156324349|156377356	1:163189295|163189984
2:72662774|72662948	1:158249937|158258256	1:163189295|163197984
3:19536870|19544544	1:158261841|158264523	1:163211217|163212239
15:46247088|46248130	1:159277862|159279434	1:163408423|163424700
5:6010064|6011187	1:159341717|159350894	1:163477441|163481032
3:80721987|80729963	1:159371732|159373184	1:163477441|163485045
1:129687076|129688206	1:159390070|159390684	1:163673701|163674120
14:121395348|121396290	1:161909790|161920459	1:163743155|163758473
9:82118876|82147800	1:161909790|161924707	1:163865640|163866262
9:121105770|121107697	1:161914174|161924707	1:164354260|164368175
4:19217524|19227087	1:162388369|162423028	1:164420445|164433489
9:36625370|36700975	1:163013886|163020678	1:166033284|166037819
15:79018338|79036513	1:163026219|163042228	1:166033284|166044981
18:54366106|54404485	1:163184041|163189984	1:166036953|166037819
7:58850363|58868520	1:163189295|163189984	1:166036953|166044981
10:5777659|5797656	1:163189295|163197984	1:166036953|166058413
13:16847999|16850593	1:163211217|163212239	1:168879757|168884181
2:49722822|49759956	1:163408423|163424700	1:169420292|169424282
X:7951846|7953075	1:163477441|163481032	1:169439042|169482865
3:44109596|44122061	1:163477441|163485045	1:169462444|169482865
4:130722830|130728385	1:163673701|163674120	1:169468880|169482865
5:6565453|6566862	1:163743155|163758473	1:169491976|169559446
3:31358570|31359294	1:163865640|163866262	1:169526367|169559446
6:69393864|69395233	1:164354260|164368175	1:169540497|169559446
4:94034036|94036050	1:164420445|164433489	1:169713656|169718710
17:39736490|39740406	1:165549895|165582736	1:169821469|169829760
5:16628232|16669538	1:165562758|165582736	1:175149204|175153083
4:79987800|79990116	1:166033284|166037819	1:175221564|175230407
14:41636873|41643575	1:166033284|166044981	1:175221564|175246746
1:240031986|240040048	1:166036953|166037819	1:175223270|175230407
2:14905402|14915344	1:166036953|166044981	1:175244214|175245842
5:57753699|57759286	1:166036953|166058413	1:175244214|175246746
16:47608813|47636273	1:168879757|168884181	1:175244214|175262366
1:90036440|90040011	1:169420292|169424282	1:175300727|175309846
12:21970495|21971992	1:169439042|169482865	1:175409308|175443338
3:92045274|92046871	1:169462444|169482865	1:175422949|175443338
6:150318008|150327395	1:169468880|169482865	1:179614385|179618306
10:68645780|68671405	1:169491976|169559446	1:179615904|179619207
16:34525577|34540328	1:169526367|169559446	1:179631516|179636388
7:31748995|31772994	1:169540497|169559446	1:179650258|179656225
14:56675693|56688014	1:169713656|169718710	1:179928002|179936440
16:47423320|47425696	1:169821469|169829760	1:179928002|179949230
2:144473587|144485328	1:175149204|175153083	1:180191312|180195770
6:158049148|158049305	1:175221564|175230407	1:180354440|180375104
4:77614097|77618720	1:175221564|175246746	1:180407635|180431593
8:83276933|83277400	1:175223270|175230407	1:180529105|180552016
13:108816286|108854260	1:175244214|175245842	1:180939110|180943732
7:86044906|86061957	1:175244214|175246746	1:181739654|181743674
14:71844195|71861362	1:175244214|175262366	1:182335259|182341782
1:235970787|235977603	1:175300727|175309846	1:182338671|182341116
2:15967840|16021491	1:175409308|175443338	1:182340847|182341116
3:58339735|58341614	1:175422949|175443338	1:182340847|182341782
Y:9399938|9432236	1:179614385|179618306	1:182341721|182348499
13:108810158|108829633	1:179615904|179619207	1:182344156|182348499
9:12097454|12104252	1:179631516|179636388	1:182373763|182388778
3:53682936|53687311	1:179650258|179656225	1:182678727|182720865
13:114525792|114530350	1:179928002|179936440	1:182688834|182720865
9:56717326|56722470	1:179928002|179949230	1:182709191|182720865
1:136149009|136175743	1:180191312|180195770	1:184048957|184049475
1:190648253|190654424	1:180354440|180375104	1:184914188|184923633
3:18069859|18074367	1:180407635|180431593	1:184920695|184940806
3:107129977|107151869	1:180529105|180552016	1:184960028|184975608
2:47488488|47489786	1:180939110|180943732	1:187315688|187323793
6:93897569|93901963	1:181739654|181743674	1:187361012|187368335
1:248463645|248483274	1:182335259|182341782	1:187388814|187391730
1:122641984|122652467	1:182338671|182341116	1:187401201|187411824
5:56640129|56664010	1:182340847|182341116	1:188585728|188586393
Y:39798808|39801237	1:182340847|182341782	1:189136729|189138606
8:102220724|102226105	1:182341721|182348499	1:189746194|189748073
9:8426020|8434174	1:182344156|182348499	1:189746194|189769062
13:206986084|206987084	1:182373763|182388778	1:189757487|189769062
18:24985702|25003037	1:182385861|182388778	1:189763515|189809078
13:145888937|145903705	1:182678727|182720865	1:194001520|194011399
4:124905253|124943084	1:182688834|182720865	1:194178416|194179870
13:158599501|158604772	1:182709191|182720865	1:196101699|196127738
1:54461976|54529700	1:184048957|184049475	1:200899063|200919078
7:98906872|98907729	1:184715052|184717478	1:200899063|200922046
13:153818741|153839132	1:184914188|184923633	1:201246168|201253312
1:169530570|169559446	1:184920695|184940806	1:201951298|201986391
4:77612564|77618720	1:184960028|184975608	1:202107433|202156800
3:11456640|11457640	1:187315688|187323793	1:202188216|202225299
1:7594612|7599773	1:187361012|187368335	1:202207302|202228210
1:203531906|203561227	1:187388814|187391730	1:202536297|202536998
10:12698273|12701699	1:187401201|187411824	1:203445015|203446187
1:64472655|64507845	1:188585728|188586393	1:203474706|203476159
5:100357377|100373794	1:189136729|189138606	1:203504834|203561227
7:115810162|115810406	1:189746194|189748073	1:203515105|203537078
5:24770425|24813354	1:189746194|189769062	1:203531906|203537078
9:74804078|74824099	1:189757487|189769062	1:203531906|203547745
7:4897828|4911870	1:189763515|189809078	1:203531906|203561227
9:104934227|104984915	1:194001520|194011399	1:203538848|203547745
15:76226667|76228805	1:194178416|194179870	1:203560906|203561227
8:29513969|29561547	1:196101699|196127738	1:203730146|203739415
14:76486443|76487631	1:200899063|200919078	1:205454952|205527866
9:100220615|100220895	1:200899063|200922046	1:205495591|205527866
9:116218093|116219108	1:201246168|201253312	1:205515399|205527866
11:69097872|69112121	1:201951298|201986391	1:205515399|205557988
7:50861195|50934805	1:202107433|202156800	1:207190793|207194651
2:26494123|26510836	1:202188216|202225299	1:207223705|207243608
5:73586132|73620071	1:202207302|202228210	1:207695988|207720366
11:21786478|21793730	1:202536297|202536998	1:215371012|215389275
13:148517273|148534946	1:203445015|203446187	1:215749638|215750211
1:215739009|215771774	1:203474706|203476159	1:215754530|215771774
4:34835874|34850285	1:203502034|203504966	1:216148995|216177064
4:122275847|122285360	1:203502034|203516233	1:216148995|216199042
6:115711237|115760551	1:203504834|203561227	1:216175647|216199042
1:121454891|121464032	1:203515105|203537078	1:216209672|216210109
13:201067069|201068601	1:203531906|203537078	1:216332768|216343472
13:107080757|107085025	1:203531906|203547745	1:216332768|216355572
1:273972338|273979720	1:203531906|203561227	1:216914275|216951002
6:135651327|135659362	1:203538848|203547745	1:217643588|217644074
18:52625249|52628187	1:203560906|203561227	1:217786693|217794582
6:13568695|13572961	1:203730146|203739415	1:217793463|217794582
4:78124832|78139488	1:205454952|205527866	1:218048427|218069031
2:108613708|108617312	1:205495591|205527866	1:219000459|219012918
1:27429055|27450660	1:205515399|205527866	1:219008811|219016372
11:25838073|25863874	1:205515399|205557988	1:219010541|219028462
2:59261730|59262716	1:207190793|207194651	1:219193192|219198006
6:89528253|89549334	1:207223705|207243608	1:222582659|222587312
14:64902328|64908351	1:207695988|207720366	1:223722952|223723842
9:38263652|38283820	1:215371012|215389275	1:223974592|224043756
12:36418549|36419324	1:215749638|215750211	1:224019855|224043756
1:267600878|267620502	1:215754530|215771774	1:225797245|225797927
11:21791604|21805764	1:216148995|216177064	1:227998338|228034973
18:40616158|40616672	1:216148995|216199042	1:227998338|228037829
1:225018521|225019819	1:216175647|216199042	1:227999397|228034973
10:24774960|24779098	1:216209672|216210109	1:227999397|228037829
6:103857535|103873885	1:216332768|216343472	1:228032343|228037829
13:23039894|23057163	1:216332768|216355572	1:228034714|228037829
4:15746247|15750846	1:216914275|216951002	1:228980934|228986161
1:182709191|182720865	1:217643588|217644074	1:229788474|229795138
15:25158737|25161087	1:217786693|217794582	1:230091380|230101283
3:7073431|7088481	1:217793463|217794582	1:230179268|230182141
8:132071248|132074946	1:218048427|218069031	1:230250825|230254225
1:272122492|272138444	1:219000459|219012918	1:230266504|230279065
16:49097121|49103950	1:219008811|219016372	1:234301929|234311705
15:64783591|64813495	1:219010541|219028462	1:234411176|234447348
6:20282522|20296786	1:219193192|219198006	1:235970787|235977603
13:53085574|53106944	1:219612903|219802079	1:235970787|235983215
7:64257405|64287500	1:222582659|222587312	1:237126956|237127531
3:73037453|73069869	1:223722952|223723842	1:238015229|238018002
6:18553565|18555525	1:223974592|224043756	1:238520086|238526913
8:105029305|105034433	1:224019855|224043756	1:239349226|239352576
15:104799802|104815122	1:225797245|225797927	1:239800374|239832709
8:16716774|16743600	1:227998338|228034973	1:240889406|240905368
1:44921012|44933494	1:227998338|228037829	1:241979932|241998014
9:19905675|19913189	1:227999397|228034973	1:241979932|242004276
3:26689980|26705896	1:227999397|228037829	1:241979932|242018942
15:104880117|104889512	1:228032343|228037829	1:242111791|242113126
2:141219340|141222143	1:228034714|228037829	1:242111791|242116331
11:1341589|1364698	1:228980934|228986161	1:242242621|242259806
5:73473989|73481454	1:229788474|229795138	1:246238089|246243861
7:86055233|86070457	1:230091380|230101283	1:248463645|248474020
17:52996471|53014574	1:230179268|230182141	1:248463645|248483274
11:49265804|49302654	1:230250825|230254225	1:248463645|248486255
13:196264682|196266209	1:230266504|230279065	1:249952511|249967237
1:109384395|109402997	1:234301929|234311705	1:249967177|249971713
12:37353245|37355669	1:234411176|234447348	1:250042850|250058264
13:141284326|141287865	1:235969399|235983215	1:250119554|250119951
15:66291710|66299872	1:235969399|235999042	1:250119554|250133995
8:68132843|68134965	1:235970787|235977603	1:250119554|250171078
12:36372395|36372591	1:235970787|235983215	1:250949831|250956707
7:52121146|52122358	1:237126956|237127531	1:252271582|252280307
3:28903672|28904794	1:238015229|238018002	1:252431131|252435454
8:76195576|76237387	1:238520086|238526913	1:252995231|253000302
5:82416126|82436342	1:239349226|239352576	1:253012174|253014268
13:173530573|173566283	1:239800374|239832709	1:253012174|253056412
X:64310696|64319564	1:240889406|240905368	1:253024490|253038696
9:72005482|72019818	1:241979932|241998014	1:253024490|253056412
1:246238089|246243861	1:241979932|242004276	1:253034155|253056412
7:13540392|13541706	1:241979932|242018942	1:253131828|253161395
15:77251049|77283482	1:242111791|242113126	1:253133582|253147131
2:80975762|80992288	1:242111791|242116331	1:253514454|253532500
15:76166995|76207508	1:242242621|242259806	1:253842995|253853400
1:22664708|22671408	1:246238089|246243861	1:260540753|260549927
3:59210066|59210610	1:248463645|248474020	1:260586642|260607330
7:86036358|86087677	1:248463645|248483274	1:261002547|261006200
1:54487286|54502778	1:248463645|248486255	1:261237316|261244602
4:93738637|93747422	1:249952511|249967237	1:261237316|261246048
5:59915033|59935574	1:249967177|249971713	1:261388210|261394508
1:12369903|12382167	1:249967177|249980004	1:263811314|263814895
6:63879633|63893464	1:250042850|250058264	1:263873074|263916275
9:52741868|52743861	1:250119554|250119951	1:263873074|263932949
4:30780172|30818482	1:250119554|250133995	1:263873074|263940366
5:6010064|6014815	1:250119554|250171078	1:263932775|263940366
13:147814768|147839301	1:250949831|250956707	1:264019073|264020783
6:13105853|13123467	1:252271582|252280307	1:264094123|264097152
15:72462370|72492446	1:252390136|252391007	1:265729318|265751600
9:45676380|45678603	1:252431131|252435454	1:266014574|266018477
10:32800584|32819154	1:252995231|253000302	1:266282112|266312704
4:18795587|18796063	1:253012174|253014268	1:266296454|266312704
7:117693554|117738424	1:253012174|253056412	1:266296454|266321713
4:3108315|3201155	1:253024490|253038696	1:266309590|266312704
11:60471675|60494244	1:253024490|253056412	1:266309590|266321713
13:123437550|123452720	1:253034155|253056412	1:266554302|266575250
6:12234387|12252148	1:253131828|253161395	1:266567618|266575250
15:77565524|77575251	1:253133582|253147131	1:266981815|266999838
14:129647376|129655287	1:253514454|253532500	1:266981815|267028781
13:132945576|132975398	1:253842995|253853400	1:266986661|266999838
9:84694823|84703395	1:254693748|254695049	1:266986661|267028781
13:30516967|30522449	1:260540753|260549927	1:267525106|267545008
X:61735211|61746482	1:260586642|260607330	1:267600878|267620502
6:52352277|52356296	1:261002547|261006200	1:269180444|269182615
15:15931074|15935249	1:261237316|261244602	1:270112842|270131332
3:71510771|71511109	1:261237316|261246048	1:270205474|270211454
14:91324564|91327669	1:261388210|261394508	1:270874729|270876043
17:17591384|17596265	1:263811314|263814895	1:271368900|271377311
5:101790862|101870547	1:263873074|263916275	1:271368900|271384260
16:71254368|71254824	1:263873074|263932949	1:271373683|271384260
6:106936502|106978180	1:263873074|263940366	1:271397310|271402609
10:59845866|59853584	1:263932775|263940366	1:271551340|271561877
7:97212386|97219132	1:264019073|264020783	1:272122492|272138444
4:66501313|66567101	1:264094123|264097152	1:272180596|272187627
1:130662012|130670294	1:265729318|265751600	1:272191162|272200220
1:184914188|184923633	1:266014574|266018477	1:273342081|273347767
4:36919461|36943934	1:266282112|266312704	1:273771031|273777030
8:132254826|132267537	1:266296454|266312704	1:273972338|273979720
10:43443984|43446589	1:266296454|266321713	10:5777659|5797656
18:17523807|17565509	1:266309590|266312704	10:7667574|7689038
5:73372351|73387814	1:266309590|266321713	10:8265577|8271193
14:50462714|50466908	1:266554302|266575250	10:8382470|8384507
9:12723325|12723625	1:266567618|266575250	10:8382470|8386109
13:82982327|82987202	1:266981815|266999838	10:11344911|11346876
13:117240823|117241978	1:266981815|267028781	10:11446256|11451376
1:110843853|110898034	1:266986661|266999838	10:11446256|11459646
11:63740098|63751684	1:266986661|267028781	10:11469821|11472476
1:249967177|249971713	1:267525106|267545008	10:11603222|11654794
9:106977196|106988900	1:267600878|267620502	10:11693303|11694808
13:46116043|46134234	1:269180444|269182615	10:12407369|12417836
9:28120503|28122017	1:270112842|270131332	10:12471548|12477393
14:112836925|112844150	1:270205474|270211454	10:12564139|12564881
15:86556414|86561911	1:270874729|270876043	10:12643795|12647330
3:113146625|113148454	1:271368900|271377311	10:12721730|12738171
1:1639166|1663793	1:271368900|271384260	10:13491755|13527498
15:77920339|77953016	1:271373683|271384260	10:13516188|13527498
1:266986661|266999838	1:271397310|271402609	10:14826467|14850824
3:83494202|83534429	1:271551340|271561877	10:15051106|15063364
11:19250142|19281642	1:272122492|272138444	10:15083385|15095653
4:37181706|37188961	1:272180596|272187627	10:16216508|16227144
5:70958573|70964317	1:272191162|272200220	10:16541738|16607933
4:36796977|36840800	1:273342081|273347767	10:16560321|16607933
4:90556386|90557015	1:273771031|273777030	10:17467676|17468635
13:95696483|95709483	1:273972338|273979720	10:17478592|17481300
3:69377498|69390965	10:5777659|5797656	10:20423359|20492105
4:118211129|118230068	10:7667574|7689038	10:20438111|20481282
2:66252542|66252936	10:8265577|8271193	10:20438111|20492105
14:60813334|60813820	10:8382470|8384507	10:20455784|20487072
8:23653644|23682434	10:8382470|8386109	10:20469603|20492105
8:116275910|116294261	10:11344911|11346876	10:20469603|20492148
4:34250050|34251517	10:11446256|11451376	10:22806071|22812591
17:25124204|25132019	10:11446256|11459646	10:23313239|23321391
16:25751226|25764907	10:11469821|11472476	10:24770316|24779098
5:32998512|33000625	10:11603222|11654794	10:24770316|24781769
8:81082507|81083424	10:11693303|11694808	10:24774960|24779098
9:130326633|130384896	10:12407369|12417836	10:24776756|24781769
4:31972148|31996226	10:12471548|12477393	10:24788311|24799565
2:15090472|15148052	10:12564139|12564881	10:24795546|24799565
6:99495382|99505669	10:12643795|12647330	10:25205440|25206443
1:7593401|7598966	10:12721730|12738171	10:25750796|25760758
6:106551428|106575060	10:13491755|13527498	10:25750796|25779015
12:59319172|59323398	10:13516188|13527498	10:25754105|25760758
7:60204435|60224883	10:14826467|14850824	10:25760691|25779015
3:101765610|101802131	10:15051106|15063364	10:26146317|26218089
3:117900027|117952143	10:15083385|15095653	10:26180874|26195694
14:72434419|72437835	10:16216508|16227144	10:26180874|26212860
13:140731010|140750477	10:16541738|16607933	10:26180874|26218089
5:35635564|35638764	10:16541738|16730354	10:27735051|27738999
6:85922219|85945503	10:16560321|16607933	10:29004981|29015131
9:126334775|126345417	10:16560321|16730354	10:29028959|29035802
1:7594612|7598381	10:16569755|16730354	10:29037750|29038934
1:126625526|126626224	10:16585540|16730354	10:29207142|29210164
14:111253510|111282469	10:17467676|17468635	10:29228248|29230143
6:31962635|31980100	10:17478592|17481300	10:29300932|29304243
4:50433434|50447885	10:20423359|20492105	10:31153774|31175932
13:30524874|30547685	10:20438111|20481282	10:31157411|31175932
9:75200292|75201342	10:20438111|20492105	10:31295417|31297552
8:167697|171693	10:20455784|20487072	10:32569928|32576571
8:38497068|38523166	10:20469603|20492105	10:32800584|32819154
12:45856452|45870929	10:20469603|20492148	10:32800584|32827084
7:98330042|98330456	10:22806071|22812591	10:32817449|32824801
13:82953747|82961056	10:23313239|23321391	10:32817449|32827084
1:169462444|169482865	10:24770316|24779098	10:32817449|32843863
6:109061486|109150901	10:24770316|24781769	10:32817449|32870103
14:71765050|71767362	10:24774960|24779098	10:32840622|32843863
4:99642156|99649461	10:24776756|24781769	10:32840622|32850936
13:74791083|74825563	10:24788311|24799565	10:32850884|32859397
1:31980772|31982095	10:24795546|24799565	10:32855276|32862936
6:62642810|62647361	10:25205440|25206443	10:32859214|32870103
1:204073832|204104759	10:25750796|25760758	10:33167907|33173745
1:593018|598149	10:25750796|25779015	10:33229551|33237248
3:107313383|107324947	10:25754105|25760758	10:33610154|33613235
18:44864663|44864848	10:25760691|25779015	10:39441867|39450421
1:77203141|77241817	10:26146317|26218089	10:39984146|39991160
12:16209070|16211961	10:26180874|26195694	10:40771583|40772503
16:22431330|22439962	10:26180874|26212860	10:40771583|40779764
2:47486153|47489786	10:26180874|26218089	10:41229017|41257277
15:106867717|106882819	10:27735051|27738999	10:41724285|41730537
15:88210866|88211674	10:29004981|29015131	10:42061873|42079536
5:3717600|3739361	10:29028959|29035802	10:42063516|42079536
3:113299580|113324246	10:29037750|29038934	10:42063516|42147610
15:77126133|77127562	10:29207142|29210164	10:42063616|42079536
13:123437550|123447842	10:29228248|29230143	10:42147410|42185876
4:55789994|55790235	10:29300932|29304243	10:42147410|42194913
11:21765631|21786602	10:31153774|31175932	10:42192452|42194913
1:117474231|117479236	10:31157411|31175932	10:42468077|42479927
15:60396962|60403463	10:31295417|31297552	10:42468077|42490463
1:74043728|74052367	10:32569928|32576571	10:42490402|42510787
15:106582380|106592006	10:32800584|32819154	10:42497973|42510787
1:216882043|216901186	10:32800584|32827084	10:42552538|42555555
3:55605250|55642405	10:32817449|32824801	10:42646861|42647382
4:93738637|93749340	10:32817449|32827084	10:42852936|42855553
4:29324181|29326839	10:32817449|32843863	10:43443984|43446589
14:125584863|125602478	10:32817449|32870103	10:43448481|43453197
15:76248140|76252077	10:32840622|32843863	10:43903313|43918659
6:152441786|152448963	10:32840622|32850936	10:43967033|43996556
X:13266919|13270698	10:32850884|32859397	10:44830780|44849953
7:57171597|57173633	10:32855276|32862936	10:44928914|44935556
13:120919103|120935351	10:32859214|32870103	10:44928914|44947188
13:121713255|121722838	10:33145911|33173745	10:45992309|46006364
1:268710186|268711481	10:33167907|33173745	10:45992309|46022353
13:137185110|137240863	10:33229551|33237248	10:45992309|46027671
17:37831734|37881223	10:33610154|33613235	10:45992309|46047270
14:111118446|111120455	10:39096686|39099505	10:46002429|46022353
5:79651174|79682972	10:39336826|39457413	10:46180686|46196391
12:50206420|50213931	10:39441867|39450421	10:46475198|46489651
9:55976991|55999883	10:39984146|39991160	10:46475198|46548424
7:90698518|90751496	10:40771583|40772503	10:46538292|46548424
1:241979932|242018942	10:40771583|40779764	10:48409498|48410391
4:106850368|106874620	10:41229017|41257277	10:48532138|48562529
5:41684337|41686129	10:41724285|41730537	10:48538970|48550130
14:58236763|58238484	10:42061873|42079536	10:48538970|48562529
15:111405526|111418998	10:42063516|42079536	10:48540912|48551873
13:32661825|32662162	10:42063516|42147610	10:48814823|48820979
7:74995762|74996138	10:42063516|42185876	10:48819835|48824559
5:69789457|69794263	10:42063516|42194913	10:48820847|48824559
4:1060588|1067334	10:42063616|42079536	10:48911448|48916899
2:4412502|4422440	10:42147410|42185876	10:50624808|50631082
9:26197373|26203753	10:42147410|42194913	10:50648677|50649078
13:121699729|121700467	10:42192452|42194913	10:50716562|50757421
6:164233616|164242240	10:42468077|42479927	10:52929650|52963179
1:266981815|267028781	10:42468077|42490463	10:53089612|53104147
5:27210130|27216262	10:42490402|42510787	10:53136273|53202893
6:131862317|131882210	10:42497973|42510787	10:53144969|53202893
13:28186007|28202393	10:42552538|42555555	10:53169687|53202893
16:38089159|38125845	10:42646861|42647382	10:53197803|53202893
15:130853867|130856845	10:42852936|42855553	10:53898367|53909429
10:43442082|43450631	10:43443984|43446589	10:56466524|56478719
2:66053559|66053790	10:43448481|43453197	10:57126906|57137646
14:66658382|66664149	10:43903313|43918659	10:57167881|57236044
6:98742427|98774966	10:43967033|43996556	10:57184079|57236044
2:8564751|8568631	10:44830780|44849953	10:57201061|57212680
1:185860342|185865052	10:44928914|44935556	10:57250368|57252743
4:95526448|95526760	10:44928914|44947188	10:57250368|57297790
5:101790862|101795355	10:45992309|46006364	10:57719627|57723968
7:56881715|56940674	10:45992309|46022353	10:57752327|57768401
1:54576238|54576836	10:45992309|46027671	10:59745682|59752288
4:33688204|33694957	10:45992309|46047270	10:59804790|59814815
5:16534128|16540801	10:46002429|46022353	10:59834812|59836887
1:168879757|168884181	10:46180686|46196391	10:59845866|59853584
5:54680382|54710779	10:46475198|46489651	10:59851943|59853584
17:12061716|12084564	10:46475198|46548424	10:59913525|59919743
3:106416134|106423016	10:46538292|46548424	10:59913525|59926809
9:86021853|86025117	10:48409498|48410391	10:62797371|62807098
14:54828767|54830408	10:48532138|48562529	10:63899363|63912175
X:15742549|15779809	10:48538970|48550130	10:65179075|65191886
15:77937140|77942749	10:48538970|48562529	10:65187800|65191886
14:76278036|76289229	10:48540912|48551873	10:65244719|65247076
14:125533200|125602478	10:48736549|48747553	10:65246553|65247076
1:20792929|20818186	10:48814823|48820979	10:68491183|68512874
8:135444524|135453410	10:48819835|48824559	10:68491183|68518239
12:14533441|14538259	10:48820847|48824559	10:68645780|68671405
9:121610724|121612384	10:48911448|48916899	10:68671265|68688441
10:27748105|27790483	10:50624808|50631082	10:68684614|68688441
X:32086594|32106547	10:50648677|50649078	10:68959424|68970531
1:136179483|136233586	10:50716562|50757421	10:69084072|69085896
1:264046193|264118531	10:52929650|52963179	10:69175006|69235186
7:69814386|69828037	10:53089612|53104147	10:69176668|69182605
X:12914744|12927263	10:53136273|53202893	10:69201376|69235186
2:151068704|151069641	10:53144969|53202893	10:69212794|69235186
11:4338231|4345913	10:53158220|53202893	11:376042|380465
9:8471324|8481227	10:53169687|53202893	11:376042|384347
3:4264224|4279580	10:53197803|53202893	11:381226|420681
X:125603758|125621723	10:53898367|53909429	11:458635|468238
14:121316588|121325750	10:56466524|56478719	11:534135|562934
11:71125629|71135931	10:57126906|57137646	11:543480|555980
13:123507119|123510745	10:57167881|57236044	11:543480|562934
5:22005744|22009750	10:57184079|57236044	11:552302|562934
9:55930190|55941036	10:57201061|57212680	11:562633|562934
1:136164225|136175743	10:57250368|57252743	11:583672|604571
8:69374301|69381214	10:57250368|57297790	11:603753|604571
9:113006249|113011426	10:57719627|57723968	11:675689|676545
13:197156572|197158826	10:57752327|57768401	11:675689|683082
4:21934956|21936689	10:59745682|59752288	11:675689|686516
1:108459471|108486823	10:59804790|59814815	11:675689|694132
13:120987445|121003162	10:59834812|59836887	11:713800|714610
14:107993201|108013871	10:59845866|59853584	11:713800|716256
6:14749213|14783640	10:59851943|59853584	11:1004167|1009902
12:36144955|36154292	10:59913525|59919743	11:1141224|1141776
4:77612564|77614563	10:59913525|59926809	11:1141224|1157049
4:37426857|37503331	10:62797371|62807098	11:1141224|1175446
3:113558244|113565062	10:62874178|62950602	11:1231273|1238890
X:87082734|87091944	10:63609227|63619944	11:1355228|1376231
8:18861488|18879156	10:63899363|63912175	11:1455412|1463356
13:30522328|30524999	10:65179075|65191886	11:2737291|2741033
13:46978757|46991892	10:65187800|65191886	11:3193839|3208876
1:207724227|207742743	10:65244719|65247076	11:3208399|3208876
3:113142605|113158626	10:65246553|65247076	11:4104218|4118265
18:50511296|50511671	10:68491183|68512874	11:4299483|4345913
6:147605100|147624761	10:68491183|68518239	11:4337374|4345913
2:85507179|85518807	10:68645780|68671405	11:4338231|4345913
8:78122833|78175633	10:68671265|68688441	11:4639811|4652306
7:96520887|96552384	10:68684614|68688441	11:5503065|5507316
5:2675422|2692132	10:68959424|68970531	11:5503065|5524214
14:113680007|113694769	10:69084072|69085896	11:5503065|5546751
9:66405629|66413572	10:69175006|69235186	11:5524053|5581004
2:85605899|85626028	10:69176668|69182605	11:5524053|5593953
16:44051153|44071175	10:69201376|69235186	11:5524053|5602241
8:71874944|71877123	10:69212794|69235186	11:5577247|5581004
5:47098977|47114654	10:69266925|69267115	11:5577247|5588249
16:39980738|39984588	11:376042|380465	11:5577247|5602241
5:79458763|79460620	11:376042|384347	11:5587551|5602241
9:126369361|126371543	11:381226|420681	11:5587551|5608636
1:115575635|115595480	11:458635|468238	11:5587554|5602241
9:95398689|95406551	11:534135|562934	11:5766388|5767129
18:11417337|11447863	11:543480|555980	11:8561600|8561799
1:129102981|129114618	11:543480|562934	11:8561600|8588349
X:111382631|111414313	11:552302|562934	11:8939631|8941243
3:22660735|22666364	11:562633|562934	11:8974451|8982801
3:117213640|117245320	11:583672|604571	11:9132180|9149581
5:104306762|104314137	11:603753|604571	11:9132180|9170916
2:140517595|140524448	11:675689|676545	11:9132180|9187549
15:111418869|111424106	11:675689|683082	11:9145564|9149581
12:59273100|59308104	11:675689|686516	11:9145564|9170916
11:1141224|1175446	11:675689|694132	11:10984951|11001848
11:33391961|33392814	11:713800|714610	11:11156485|11181394
2:142404338|142406328	11:713800|716256	11:11156485|11209651
12:50117192|50135369	11:1004167|1009902	11:12828703|12838685
3:31255432|31258924	11:1141224|1141776	11:12843297|12858931
4:117700973|117742339	11:1141224|1157049	11:13233930|13249671
15:123362918|123389330	11:1141224|1175446	11:13246347|13262673
6:95299604|95304833	11:1231273|1238890	11:13330903|13349742
10:24795546|24799565	11:1355228|1376231	11:14318580|14320863
13:71896438|71897752	11:1455412|1463356	11:14579873|14590548
13:124438468|124438781	11:2737291|2741033	11:15532785|15538760
13:13942549|13979086	11:3193839|3208876	11:15777201|15783242
X:123971870|123977816	11:3208399|3208876	11:15779641|15783242
15:104702215|104716420	11:4104218|4118265	11:18160068|18170190
8:48111300|48159079	11:4299483|4345913	11:18313796|18361632
7:91387595|91392307	11:4337374|4345913	11:18350469|18361632
8:78459588|78480241	11:4338231|4345913	11:18607625|18613216
4:101830570|101830827	11:4639811|4652306	11:19129663|19134837
13:153594924|153611708	11:5503065|5507316	11:19129679|19134837
8:68095702|68107642	11:5503065|5524214	11:19200035|19204789
14:105794106|105797612	11:5503065|5546751	11:19250142|19270035
7:112641975|112645192	11:5524053|5581004	11:19250142|19281642
14:71093567|71097952	11:5524053|5593953	11:19250142|19286320
8:16728875|16755944	11:5524053|5602241	11:19253377|19274010
3:17822988|17830317	11:5577247|5581004	11:19256521|19274010
16:55686376|55690342	11:5577247|5588249	11:19349681|19356078
13:23282794|23293830	11:5577247|5602241	11:19623259|19630304
4:127654215|127660453	11:5587551|5602241	11:20710449|20719541
9:10120704|10139416	11:5587551|5608636	11:21020402|21022536
2:89359613|89370588	11:5587554|5602241	11:21256152|21275708
15:47026575|47030228	11:5766388|5767129	11:21304886|21328053
16:21431681|21434801	11:8561600|8561799	11:21778941|21786602
9:130496404|130497071	11:8561600|8588349	11:21786478|21793730
2:73829182|73858570	11:8660882|8679624	11:21789455|21805764
6:69622529|69622891	11:8939631|8941243	11:21791604|21805764
11:49141097|49145731	11:8974451|8982801	11:21797314|21805764
13:47352182|47352528	11:9132180|9149581	11:21802284|21808388
15:77219097|77231348	11:9132180|9170916	11:21804834|21808388
1:266554302|266575250	11:9132180|9187549	11:21855168|21856686
9:92397525|92397915	11:9145564|9149581	11:22249417|22255527
7:13579269|13588465	11:9145564|9170916	11:22270782|22288235
13:73754189|73792104	11:10984951|11001848	11:24729025|24739289
10:41430334|41436115	11:11156485|11181394	11:24732398|24739289
3:85570718|85584516	11:11156485|11209651	11:24857303|24858237
X:57305746|57307466	11:11160922|11266949	11:25130960|25137323
1:266309590|266312704	11:12828703|12838685	11:25318969|25343890
1:250119554|250171078	11:12843297|12858931	11:25563087|25589582
11:5730927|5744988	11:13233930|13249671	11:25758593|25768931
3:5347407|5364145	11:13246347|13262673	11:25838073|25838397
7:100593872|100597320	11:13330903|13349742	11:25838073|25863874
1:78136844|78149434	11:14318580|14320863	11:30548837|30549202
5:47102850|47185514	11:14579873|14590548	11:33313986|33336182
1:184048957|184049475	11:15532785|15538760	11:46069180|46155680
7:46700944|46701207	11:15709103|15712263	11:47567123|47571287
13:134838956|134846673	11:15777201|15783242	11:47845080|47851849
6:80793070|80812938	11:15779641|15783242	11:49141097|49145731
5:101839378|101842266	11:18160068|18170190	11:49184577|49188426
9:131464801|131475251	11:18313796|18361632	11:49203468|49210487
1:112938660|112953346	11:18350469|18361632	11:49203468|49216889
3:80290983|80295248	11:18607625|18613216	11:49307682|49309007
12:11253178|11266696	11:19129663|19134837	11:49312368|49353419
1:169397267|169410448	11:19129679|19134837	11:50762620|50770811
6:13145271|13149888	11:19200035|19204789	11:50762620|50773425
1:9893445|9923857	11:19250142|19270035	11:51531489|51534900
4:29014534|29068902	11:19250142|19281642	11:51531489|51547197
1:272186365|272200220	11:19250142|19286320	11:51531489|51551593
13:100108435|100116310	11:19253377|19274010	11:51531489|51554792
4:50356925|50382298	11:19256521|19274010	11:51534767|51551593
9:105408960|105415644	11:19349681|19356078	11:51540591|51551593
10:14826467|14850824	11:19623259|19630304	11:64261142|64267916
10:42063516|42079536	11:20710449|20719541	11:65281607|65286894
2:113442089|113466481	11:21020402|21022536	11:66535744|66536519
1:268317896|268318444	11:21256152|21275708	11:67409533|67411878
13:108973992|108978979	11:21304886|21328053	11:67767430|67782441
Y:9407816|9432236	11:21778941|21786602	11:67876073|67898460
1:121201527|121220450	11:21786478|21793730	11:68173040|68181097
6:52584896|52585202	11:21789455|21805764	11:68431679|68444034
14:61389331|61400625	11:21791604|21805764	11:68450305|68454998
6:157642376|157643996	11:21797314|21805764	11:71125629|71135931
10:42490402|42510787	11:21802284|21808388	11:74256035|74258629
6:109003924|109004541	11:21804834|21808388	11:75989454|76038044
6:14754391|14769224	11:21855168|21856686	11:76862197|76864415
9:66906038|66907066	11:22249417|22255527	11:77498616|77503607
1:152723999|152737450	11:22270782|22288235	11:78343010|78352808
12:20440837|20443556	11:24729025|24739289	11:78349882|78356609
18:10794878|10806244	11:24732398|24739289	11:78351385|78356609
8:1861464|1862708	11:24857303|24858237	11:78382356|78383968
6:95925563|95938136	11:25130960|25137323	11:78460307|78476070
14:14989270|15001827	11:25318969|25343890	11:78543049|78543369
1:76649382|76727151	11:25563087|25589582	11:78715314|78717933
6:7029994|7037336	11:25758593|25768931	11:78762107|78773224
14:49403144|49424492	11:25838073|25838397	12:413917|422053
16:71254368|71255339	11:25838073|25863874	12:573171|585916
5:100294418|100393190	11:30548837|30549202	12:580548|585916
8:101750483|101751380	11:33313986|33336182	12:833107|834948
1:152700474|152737450	11:46069180|46155680	12:1492107|1494267
1:242082919|242084290	11:47567123|47571287	12:1746369|1752772
8:68088833|68118948	11:47845080|47851849	12:1804301|1853441
18:52900863|52902165	11:49141097|49145731	12:1838275|1853441
1:108257595|108268239	11:49184577|49188426	12:2288303|2292225
5:21267344|21267784	11:49203468|49210487	12:4778463|4784906
7:117693554|117695673	11:49203468|49216889	12:4792015|4796795
10:26879612|26890213	11:49307682|49309007	12:5469594|5470566
12:13578227|13590760	11:49312368|49353419	12:5678153|5678879
16:44513270|44517349	11:50762620|50770811	12:7592600|7595678
7:37701803|37713084	11:50762620|50773425	12:11098684|11105179
6:81724740|81724892	11:51531489|51534900	12:11098684|11106997
15:105192557|105215674	11:51531489|51547197	12:11098684|11110769
15:32100862|32104117	11:51531489|51551593	12:11098684|11115276
1:14017929|14038852	11:51531489|51554792	12:11098684|11118110
11:5503065|5524214	11:51534767|51551593	12:11098684|11119957
2:114706886|114772430	11:51540591|51551593	12:11098684|11125448
9:83337108|83367161	11:64261142|64267916	12:11098684|11125464
14:71161312|71179948	11:64930970|64963732	12:11098684|11142803
6:159448247|159455163	11:65281607|65286894	12:11098684|11145774
13:137970212|137975836	11:66535744|66536519	12:11103609|11115276
7:85679572|85719573	11:67409533|67411878	12:11112619|11114129
2:78892190|78893995	11:67767430|67782441	12:11112619|11115276
5:2637894|2692132	11:67876073|67898460	12:11115157|11125448
2:114823795|114838908	11:68173040|68181097	12:11186888|11197568
7:64302845|64327181	11:68431679|68444034	12:11202344|11212882
9:12903427|12918332	11:68450305|68454998	12:11253178|11266696
2:151831534|151835178	11:71125629|71135931	12:11253178|11268222
10:20438111|20481282	11:74256035|74258629	12:11350266|11439932
9:64539709|64551059	11:75989454|76038044	12:11369889|11380966
1:130255152|130256849	11:76862197|76864415	12:11669306|11671052
10:13449564|13471890	11:77498616|77503607	12:11669306|11672541
9:56641051|56641890	11:78343010|78352808	12:11800135|11808818
2:91768020|91773257	11:78349882|78356609	12:12704689|12715789
10:36913615|36987675	11:78351385|78356609	12:12736751|12757927
4:85915400|85922913	11:78382356|78383968	12:12736751|12807169
1:227998338|228037829	11:78460307|78476070	12:12757544|12771332
13:30503366|30524999	11:78543049|78543369	12:12801758|12807169
7:32559434|32568599	11:78715314|78717933	12:13214453|13221925
17:17623991|17630911	11:78762107|78773224	12:14155982|14163865
2:80183438|80186189	12:413917|422053	12:14178158|14185034
8:55735438|55743017	12:573171|585916	12:14438843|14454660
6:106978073|107018532	12:580548|585916	12:14461252|14488093
7:77775885|77776878	12:833107|834948	12:14465466|14471485
9:33729669|33735453	12:1492107|1494267	12:14478611|14488093
1:128198|132692	12:1746369|1752772	12:14479742|14488093
14:46985143|46993251	12:1804301|1853441	12:14533441|14538259
14:121316588|121318744	12:1838275|1853441	12:14676938|14681495
1:121213867|121216490	12:2288303|2292225	12:14697840|14708065
11:67376986|67384484	12:4778463|4784906	12:15287153|15288986
13:121576383|121577363	12:4792015|4796795	12:16145896|16174077
13:38536703|38545830	12:5469594|5470566	12:16156838|16181569
15:64252261|64257135	12:5678153|5678879	12:16158876|16174077
15:118367910|118399202	12:7592600|7595678	12:16164207|16181569
7:27252633|27253263	12:11098684|11105179	12:16172826|16181569
1:113199904|113223520	12:11098684|11106997	12:16195632|16211961
2:78887694|78889324	12:11098684|11110769	12:16209070|16211961
4:68935650|68958236	12:11098684|11115276	12:16822210|16829262
3:8682190|8682860	12:11098684|11118110	12:16838068|16844840
8:73884248|73896565	12:11098684|11119957	12:16952831|16954694
14:76768345|76786931	12:11098684|11125448	12:16953323|16954694
18:54260019|54270584	12:11098684|11125464	12:17033862|17060678
15:59325224|59328343	12:11098684|11142803	12:17044270|17060678
AEMK02000452.1:2189903|2193727	12:11098684|11145774	12:18207151|18209860
9:116186722|116188948	12:11103609|11115276	12:18487310|18501537
10:46911904|46921751	12:11112619|11114129	12:18552929|18555766
14:39536030|39536233	12:11112619|11115276	12:20126112|20129339
11:713800|724858	12:11115157|11125448	12:20126112|20136260
7:96455157|96456934	12:11186888|11197568	12:20233514|20238667
6:951406|951686	12:11202344|11212882	12:20440837|20443556
9:124755328|124755991	12:11253178|11266696	12:21118219|21141475
18:9686308|9692329	12:11253178|11268222	12:22606823|22607386
1:269180444|269182615	12:11281386|11443373	12:22940646|22948639
8:84214807|84220051	12:11350266|11439932	12:23857979|23872399
2:44447664|44474027	12:11369889|11380966	12:24327241|24328063
5:7326333|7331876	12:11669306|11671052	12:25065050|25069215
18:17883391|17912006	12:11669306|11672541	12:25066506|25069215
7:58850345|58868520	12:11800135|11808818	12:25235501|25236446
9:107064877|107126306	12:12704689|12715789	12:25811078|25814867
15:55813407|55814723	12:12736751|12757927	12:27249779|27250993
12:35297852|35325792	12:12736751|12807169	12:27268443|27275982
7:62714874|62719144	12:12757544|12771332	12:27298750|27312593
17:53012907|53043217	12:12801758|12807169	12:27474893|27499620
11:21797314|21805764	12:13214453|13221925	12:27528864|27538247
14:14927923|14934467	12:14155982|14163865	12:27531355|27538247
8:74553738|74557475	12:14178158|14185034	12:31219376|31223236
AEMK02000452.1:2035285|2045203	12:14430775|14448031	12:31252450|31264174
12:16025930|16031802	12:14438843|14454660	12:31337521|31362356
16:22564679|22572494	12:14461252|14488093	12:31358562|31388511
8:29548901|29555037	12:14465466|14471485	12:31358562|31398979
18:1475203|1481335	12:14478611|14488093	12:34980903|35008491
13:133304786|133312344	12:14479742|14488093	12:34998808|35008491
13:71476640|71492001	12:14533441|14538259	12:35297852|35325792
7:114378276|114402432	12:14676938|14681495	12:35903291|35910192
3:55636605|55636888	12:14697840|14708065	12:35904682|35905611
10:19846605|19848818	12:15287153|15288986	12:35952253|35960199
6:18555386|18558354	12:16145896|16174077	12:35952253|35999542
9:97141576|97142970	12:16156838|16181569	12:35952997|35960199
9:32902790|32920023	12:16158876|16174077	12:35952997|35999542
6:951403|951686	12:16164207|16181569	12:35952997|36034176
3:17688479|17699155	12:16172826|16181569	12:36103170|36105578
8:19335075|19337215	12:16195632|16211961	12:36123743|36126760
X:64316847|64346816	12:16209070|16211961	12:36123743|36150375
7:46550514|46567205	12:16822210|16829262	12:36123743|36154292
6:109139462|109171834	12:16838068|16844840	12:36144955|36154292
3:125943043|125943717	12:16952831|16954694	12:36150268|36154292
9:36537603|36540781	12:16953323|16954694	12:36167409|36170928
15:29932361|29939777	12:17033862|17060678	12:36362691|36367060
8:87799383|87820356	12:17044270|17060678	12:36362691|36372744
13:39916442|39916820	12:18207151|18209860	12:36372064|36372744
18:36071194|36071372	12:18487310|18501537	12:36418549|36419324
5:83829027|83836287	12:18552929|18555766	12:37490006|37517080
8:31035243|31041185	12:20118352|20123255	12:37509450|37517080
11:562633|562934	12:20126112|20129339	12:37636936|37649220
3:113127816|113148454	12:20126112|20136260	12:37921571|37928284
3:44174961|44183383	12:20233514|20238667	12:38083733|38093378
16:34633974|34666354	12:20440837|20443556	12:38103106|38109151
4:38966939|38967502	12:20557579|20558813	12:38796303|38800438
6:77683512|77683699	12:21118219|21141475	12:39026678|39039068
11:49318747|49353419	12:22606823|22607386	12:39036725|39037930
8:119689795|119720021	12:22940646|22948639	12:39143012|39144118
11:21256152|21275708	12:23857979|23872399	12:39310277|39311632
15:81017941|81037449	12:24327241|24328063	12:39366927|39391822
6:88644098|88646110	12:25065050|25069215	12:39714543|39716761
13:200707866|200731785	12:25066506|25069215	12:39904915|39918403
12:54477951|54492240	12:25235501|25236446	12:42587230|42590132
13:30472205|30473996	12:25811078|25814867	12:42587230|42596350
1:107843607|107847007	12:27249779|27250993	12:42589975|42596350
18:10285998|10297756	12:27268443|27275982	12:42750233|42758003
1:145790735|145803586	12:27298750|27312593	12:42750233|42762928
6:88430047|88431362	12:27474893|27499620	12:42757754|42762928
5:65782035|65782627	12:27528864|27538247	12:42888795|42891072
10:32800584|32827084	12:27531355|27538247	12:43006733|43029509
1:77263699|77270404	12:31219376|31223236	12:43096806|43097800
7:68362207|68387926	12:31252450|31264174	12:43344730|43344939
2:142190605|142196740	12:31337521|31362356	12:43506706|43538197
2:15322375|15323114	12:31358562|31388511	12:43508452|43509462
9:36492935|36497094	12:31358562|31398979	12:43516178|43526438
13:45341496|45342013	12:34980903|35008491	12:43595390|43611935
13:19011270|19032504	12:34998808|35008491	12:43595390|43625069
3:117899269|117903927	12:35297852|35325792	12:43650050|43677207
9:72032604|72044514	12:35903291|35910192	12:43650050|43691261
16:18379579|18387297	12:35904682|35905611	12:43673069|43677207
14:54538637|54541433	12:35952253|35960199	12:43673069|43691261
3:114743498|114751378	12:35952253|35999542	12:45688138|45690878
13:29894359|29898615	12:35952997|35960199	12:45870808|45887992
3:38413987|38450234	12:35952997|35999542	12:46277587|46299080
5:16654325|16669538	12:35952997|36034176	12:46286402|46299080
13:82256891|82285635	12:36103170|36105578	12:46469237|46498494
4:82799779|82802274	12:36123743|36126760	12:47237445|47270994
6:159190380|159191055	12:36123743|36150375	12:48377167|48381478
10:41724285|41730537	12:36123743|36154292	12:48377612|48381478
12:46274215|46309347	12:36144955|36154292	12:48687199|48712536
13:2460558|2466993	12:36150268|36154292	12:49912798|49916345
9:36698685|36715744	12:36167409|36170928	12:50206420|50209164
13:68607144|68611602	12:36362691|36367060	12:50206420|50213931
2:26502035|26518029	12:36362691|36372744	12:50206420|50226240
13:73882476|73890683	12:36372064|36372744	12:50226122|50233618
15:76226667|76292128	12:36418549|36419324	12:50266696|50282622
8:99218275|99228789	12:37490006|37517080	12:50746985|50751777
2:40680514|40688349	12:37509450|37517080	12:51619119|51636844
16:47504607|47513954	12:37636936|37649220	12:51625930|51636844
15:72311995|72317661	12:37921571|37928284	12:51636713|51642686
8:55659331|55661187	12:38083733|38093378	12:51651445|51680596
14:71850580|71853159	12:38103106|38109151	12:53612425|53633146
3:31258831|31266844	12:38796303|38800438	12:53615200|53633146
5:67681766|67688990	12:39026678|39039068	12:53703648|53708100
13:132302321|132314552	12:39036725|39037930	12:54477951|54492240
6:91974319|91991765	12:39143012|39144118	12:55430702|55432293
9:39494895|39503008	12:39310277|39311632	12:55430883|55432293
10:26689057|26692810	12:39366927|39391822	12:56366905|56376926
X:20889969|20912062	12:39714543|39716761	12:56438413|56473522
13:177453132|177474540	12:39904915|39918403	12:56438413|56490424
10:68959424|68970531	12:42587230|42590132	12:56464310|56490424
6:103884144|103891857	12:42587230|42596350	12:56473403|56490424
6:87628833|87630082	12:42589975|42596350	12:56761036|56762977
3:59423230|59425872	12:42750233|42758003	12:56971607|56986734
13:77255763|77289518	12:42750233|42762928	12:58238923|58285689
8:68088833|68107642	12:42757754|42762928	12:59273100|59283672
2:151505054|151506466	12:42888795|42891072	12:59273100|59291841
1:106664464|106665739	12:43006733|43029509	12:59273100|59296987
2:118773810|118774228	12:43096806|43097800	12:59273100|59308104
13:192380631|192398963	12:43344730|43344939	12:59273100|59342844
2:17224103|17227421	12:43506706|43538197	12:59319172|59331703
11:69097872|69131726	12:43508452|43509462	12:59320434|59323398
7:96552298|96555754	12:43516178|43526438	12:59320434|59331703
14:131216134|131221493	12:43595390|43611935	12:59541641|59546736
7:229160|252991	12:43595390|43625069	12:59740751|59748725
2:151046469|151057468	12:43650050|43677207	12:59821853|59822490
8:87799383|87876502	12:43650050|43691261	12:59821853|59839936
1:152738680|152751454	12:43673069|43677207	12:59827745|59839936
17:37831734|37862678	12:43673069|43691261	12:59827745|59846613
14:77415234|77419754	12:45688138|45690878	12:60182783|60184718
13:133998817|133998979	12:45870808|45887992	12:60316958|60376920
12:60353452|60376920	12:46277587|46299080	12:60348042|60361193
6:98504293|98506141	12:46286402|46299080	12:60348042|60376568
2:17754004|17755241	12:46469237|46498494	12:60348042|60376920
14:24172126|24224102	12:47237445|47270994	12:60353452|60376920
14:99777610|99777965	12:48035045|48036467	12:60361138|60376568
18:40512251|40517359	12:48377167|48381478	12:60366858|60376568
8:60674068|60766689	12:48377612|48381478	12:60366858|60376920
4:3108315|3137676	12:48687199|48712536	12:60370050|60376920
3:121963544|121988417	12:49912798|49916345	12:60373334|60376920
5:98808700|98831312	12:50206420|50209164	12:60375325|60376920
1:35005532|35034972	12:50206420|50213931	12:60723827|60726142
6:92165813|92170345	12:50206420|50226240	13:1313881|1327423
13:26160701|26161417	12:50226122|50233618	13:1464115|1467192
4:76628598|76634942	12:50266696|50282622	13:1529653|1540269
15:489658|492890	12:50746985|50751777	13:2455229|2466993
1:119735151|119740313	12:51619119|51636844	13:2455229|2479744
13:122727540|122799645	12:51625930|51636844	13:2464744|2472398
14:112705127|112714985	12:51636713|51642686	13:2799779|2816507
X:91664787|91683235	12:51651445|51680596	13:2806687|2816507
9:105054994|105101002	12:53612425|53633146	13:2810084|2832193
7:74365938|74379655	12:53615200|53633146	13:2940058|2964480
5:42538537|42543247	12:53703648|53708100	13:4115487|4120836
6:18004570|18015481	12:54477951|54492240	13:4407150|4414280
5:71365584|71404151	12:55430702|55432293	13:6930900|6933794
12:19563932|19564948	12:55430883|55432293	13:10289379|10332426
1:54576238|54581212	12:56366905|56376926	13:10765898|10778469
1:119542574|119587599	12:56438413|56473522	13:10914515|10943848
11:23169655|23197868	12:56438413|56490424	13:11164591|11209734
17:44164326|44166273	12:56464310|56490424	13:12542442|12548099
13:157429171|157446764	12:56473403|56490424	13:12556296|12562830
3:80371236|80390801	12:56761036|56762977	13:12626206|12633500
9:75936930|75949857	12:56971607|56986734	13:12666411|12670563
13:134457403|134471156	12:58238923|58285689	13:13947112|13948652
17:19388709|19414123	12:59273100|59283672	13:13987176|14004211
10:65246553|65247076	12:59273100|59291841	13:16822443|16826413
1:202156624|202180804	12:59273100|59296987	13:17582876|17587193
3:72262638|72270592	12:59273100|59308104	13:17582876|17593554
3:114424561|114430869	12:59273100|59342844	13:17582876|17602712
16:44484459|44506007	12:59319172|59331703	13:17612080|17615052
1:116035926|116038761	12:59320434|59323398	13:18341600|18350103
13:195370476|195375057	12:59320434|59331703	13:18526605|18529971
15:16786136|16788456	12:59541641|59546736	13:19227601|19251022
7:117996395|118020728	12:59740751|59748725	13:19397373|19399920
17:1179581|1182709	12:59821853|59822490	13:19401276|19415099
14:136258011|136271400	12:59821853|59839936	13:19605022|19620366
1:241979932|242004276	12:59821853|59846613	13:21762720|21781212
3:79929006|79929849	12:59827745|59839936	13:22169320|22184693
1:71002780|71020948	12:59827745|59846613	13:22209224|22219312
X:109649122|109745549	12:59958537|59960150	13:22216776|22226182
3:120141626|120146118	12:60182783|60184718	13:22216776|22239729
12:11098684|11106997	12:60316958|60376920	13:22219041|22239729
1:40116745|40119904	12:60348042|60361193	13:22226107|22239729
15:106622745|106676185	12:60348042|60376568	13:22318659|22335113
7:259291|284670	12:60348042|60376920	13:22382313|22397150
15:31320424|31336505	12:60353452|60376920	13:23072609|23085757
6:170137545|170163173	12:60361138|60376568	13:23282794|23293830
9:118014576|118041744	12:60366858|60376568	13:23319029|23322097
2:87915972|87925512	12:60366858|60376920	13:23319029|23330244
12:47237445|47270994	12:60370050|60376920	13:23747155|23754836
6:67120263|67122925	12:60373334|60376920	13:24074311|24075912
6:34743079|34751712	12:60375325|60376920	13:25391334|25398939
7:19308335|19311624	12:60723827|60726142	13:25565162|25580092
15:130848034|130856845	13:1313881|1327423	13:25705006|25715600
8:38273589|38287382	13:1464115|1467192	13:25708751|25715600
3:2593284|2603722	13:1507557|1512212	13:26106926|26109530
7:41666139|41679924	13:1529653|1540269	13:26160701|26161417
6:98742427|98766305	13:2304276|2331011	13:26160701|26169083
12:20174706|20217081	13:2455229|2466993	13:26160705|26169083
7:28639544|28643064	13:2455229|2479744	13:26364791|26365617
4:50395149|50398218	13:2464744|2472398	13:26470717|26473420
6:81230087|81236084	13:2799779|2816507	13:26682837|26686462
6:42337646|42361236	13:2806687|2816507	13:27588535|27604890
13:147837956|147839301	13:2810084|2832193	13:27664549|27688847
11:12838255|12862293	13:2940058|2964480	13:28871682|28873176
1:130233523|130278467	13:4115487|4120836	13:28871682|28886173
6:73137415|73166221	13:4407150|4414280	13:29117004|29121316
7:90002386|90029902	13:6930900|6933794	13:29894359|29925370
9:20133607|20141949	13:10289379|10332426	13:29898476|29960782
15:109436411|109441836	13:10765898|10778469	13:29901475|29916530
15:110727073|110742697	13:10914515|10943848	13:29915862|29925370
18:13750787|13765569	13:11164591|11209734	13:29944690|29960782
1:84036049|84038578	13:12542442|12548099	13:29945767|29960782
3:5094441|5097362	13:12556296|12562830	13:29953610|29960782
10:17485373|17485676	13:12626206|12633500	13:30110846|30113591
16:29763897|29797079	13:12666411|12670563	13:30263943|30266907
14:61002771|61016166	13:13947112|13948652	13:30431233|30445612
2:116750435|116793088	13:13987176|14004211	13:30431233|30458124
1:131284456|131288341	13:16822443|16826413	13:30431233|30473996
8:55614208|55620179	13:17582876|17587193	13:30445478|30473996
9:6401452|6410673	13:17582876|17593554	13:30455037|30473996
X:28270770|28315863	13:17582876|17602712	13:30472205|30473996
15:106591703|106612801	13:17612080|17615052	13:30472205|30512528
13:203325937|203330171	13:18341600|18350103	13:30487786|30524999
16:22487536|22497499	13:18526605|18529971	13:30495982|30512528
7:53401333|53402288	13:19227601|19251022	13:30495982|30524999
15:45769517|45792844	13:19397373|19399920	13:30500711|30524999
9:135060744|135060941	13:19401276|19415099	13:30500711|30547685
1:122426084|122514658	13:19605022|19620366	13:30503366|30524999
13:108816286|108829633	13:21762720|21781212	13:30512469|30547685
13:54675580|54678797	13:22169320|22184693	13:30516967|30524999
15:798470|825763	13:22209224|22219312	13:30516967|30547685
11:39032191|39096095	13:22216776|22226182	13:30516967|30555481
1:16565896|16566086	13:22216776|22239729	13:30516967|30564659
1:86085546|86107255	13:22219041|22234431	13:30522328|30524999
1:146142261|146194348	13:22219041|22239729	13:30524874|30547685
5:68579273|68580637	13:22226107|22239729	13:30524874|30564659
10:53089612|53104147	13:22318659|22335113	13:30533735|30564659
1:166033284|166044981	13:22382313|22397150	13:30544508|30564659
13:144016399|144085837	13:23072609|23085757	13:31573092|31575948
15:130875217|130894869	13:23282794|23293830	13:31673546|31676127
2:142871249|142909244	13:23319029|23322097	13:31673546|31683772
4:50433434|50462793	13:23319029|23330244	13:31682729|31683772
3:52209212|52221378	13:23747155|23754836	13:31876171|31894444
9:47577773|47584409	13:24074311|24075912	13:31891050|31894444
16:25759485|25764907	13:25391334|25398939	13:32466924|32475162
15:124587035|124594858	13:25565162|25580092	13:32466924|32506478
7:20251809|20318548	13:25705006|25715600	13:32466924|32541480
1:95847010|95847294	13:25708751|25715600	13:32471562|32478114
14:109537602|109559679	13:26106926|26109530	13:32471840|32478114
3:102011754|102012242	13:26160701|26161417	13:32471840|32506478
13:79450537|79476438	13:26160701|26169083	13:32548617|32551325
6:44113709|44125379	13:26160705|26169083	13:32554728|32563493
3:102950654|102957560	13:26364791|26365617	13:32559768|32563493
10:12564139|12564881	13:26470717|26473420	13:32559768|32569679
8:37543351|37569544	13:26682837|26686462	13:32607714|32609157
12:23106467|23107649	13:27588535|27604890	13:32728371|32730874
14:39914895|39915739	13:27664549|27688847	13:34769748|34780761
15:47017102|47024464	13:28871682|28873176	13:34777898|34791379
4:110411073|110431246	13:28871682|28886173	13:34799994|34814973
1:8822877|8825081	13:29117004|29121316	13:34824030|34825924
5:43936500|43956763	13:29894359|29925370	13:34876368|34882541
15:72952825|72968061	13:29898476|29960782	13:35084780|35101407
5:76265055|76291213	13:29901475|29916530	13:35748789|35769709
2:7917525|7918215	13:29915862|29925370	13:38450278|38474769
3:6981006|6988833	13:29944690|29960782	13:38516027|38518464
14:105608428|105608744	13:29945767|29960782	13:38526031|38545830
4:18819735|18827315	13:29953610|29960782	13:38531389|38545830
3:5347407|5368914	13:30110846|30113591	13:38532801|38539423
5:103614374|103614780	13:30263943|30266907	13:38536703|38545830
4:18798633|18815854	13:30431233|30445612	13:38538687|38545830
3:28638834|28692651	13:30431233|30458124	13:38540108|38545830
8:87658984|87663752	13:30431233|30473996	13:39468507|39471302
16:34798441|34800600	13:30445478|30473996	13:39498591|39503860
1:169821469|169829760	13:30445478|30564659	13:39656592|39666279
11:24857303|24858237	13:30455037|30473996	13:39853047|39866578
13:30445478|30473996	13:30472205|30473996	13:40104687|40112945
1:163408423|163424700	13:30472205|30512528	13:43166523|43167805
6:135651327|135660627	13:30487786|30524999	13:43548996|43563837
1:52134346|52179177	13:30495982|30512528	13:45341496|45342013
5:53828916|53838066	13:30495982|30524999	13:45391196|45447139
9:92135892|92143170	13:30500711|30524999	13:46152753|46164484
18:42339883|42342492	13:30500711|30547685	13:46907904|46909314
4:97566524|97595259	13:30503366|30524999	13:46978757|46991892
2:69840324|69841770	13:30512469|30547685	13:46978757|47002023
7:94553559|94558109	13:30516967|30524999	13:46987049|47002023
14:48456454|48458261	13:30516967|30547685	13:47760569|47764526
AEMK02000452.1:764826|773915	13:30516967|30555481	13:47760569|47794947
9:131427580|131475251	13:30516967|30564659	13:50461899|50471621
6:17352018|17356850	13:30522328|30524999	13:50461899|50474243
11:76177559|76251026	13:30524874|30547685	13:50613884|50614695
11:11156485|11181394	13:30524874|30564659	13:50643756|50651009
14:12238418|12256957	13:30533735|30564659	13:50714324|50742186
14:124773571|124797001	13:30544508|30564659	13:52503349|52524507
3:4288138|4290175	13:31573092|31575948	13:53085574|53106944
6:19208372|19210655	13:31673546|31676127	13:53085574|53126405
11:68173040|68181097	13:31673546|31683772	13:53090589|53106944
1:103802719|103815098	13:31682729|31683772	13:61681808|61687986
2:26109805|26111727	13:31876171|31894444	13:64023546|64024481
13:83151533|83156879	13:31891050|31894444	13:65289860|65330679
1:215732368|215754716	13:32466924|32475162	13:65312475|65330679
12:11115157|11125448	13:32466924|32506478	13:65374802|65376965
10:39441867|39450421	13:32466924|32541480	13:65401048|65408076
17:37838591|37881223	13:32471562|32478114	13:65957292|65967418
12:45870808|45887992	13:32471840|32478114	13:66114472|66116302
2:127051486|127065981	13:32471840|32506478	13:66228491|66231124
13:150533573|150539589	13:32548617|32551325	13:66493801|66495580
12:36080372|36105578	13:32554728|32563493	13:67437822|67517641
6:52971038|52992912	13:32559768|32563493	13:67934546|67936021
2:95657661|95677798	13:32559768|32569679	13:68595006|68611602
1:207851730|207861882	13:32607714|32609157	13:68599627|68611602
1:72733011|72738156	13:32728371|32730874	13:68611370|68611602
9:133986782|133996762	13:34769748|34780761	13:68820770|68821056
14:108396931|108404957	13:34777898|34791379	13:69223492|69228869
3:37528197|37540796	13:34799994|34814973	13:69651255|69668224
1:202207302|202228210	13:34824030|34825924	13:70406477|70408175
4:65209101|65215043	13:34876368|34882541	13:71794794|71797638
1:250014513|250014805	13:35084780|35101407	13:72116572|72118925
2:136907206|136920524	13:35748789|35769709	13:73237139|73239444
3:94934784|94946499	13:38450278|38474769	13:73294632|73295032
17:5554278|5557127	13:38516027|38518464	13:73619280|73631399
7:8112728|8124823	13:38526031|38545830	13:73844884|73847800
15:79305515|79321256	13:38531389|38533670	13:73868106|73880623
8:43969450|43971598	13:38531389|38545830	13:73879907|73892682
2:58545155|58545782	13:38532801|38539423	13:73882476|73890683
1:18987938|19005183	13:38536703|38545830	13:73892522|73895711
15:105899129|105902896	13:38538687|38545830	13:74791083|74825563
12:14556718|14569779	13:38540108|38545830	13:74943688|74944461
13:47760569|47764526	13:39468507|39471302	13:75615215|75645292
8:135428264|135432189	13:39498591|39503860	13:75615215|75652667
12:42993597|43004506	13:39656592|39666279	13:77068767|77075075
11:68450305|68454998	13:39853047|39866578	13:77255763|77289518
3:78579401|78585532	13:40104687|40112945	13:77255800|77289518
15:46425015|46444465	13:43166523|43167805	13:77368876|77445610
7:31817956|31840495	13:43548996|43563837	13:77614171|77656080
7:15534176|15557917	13:45341496|45342013	13:79476250|79496843
8:69647889|69657094	13:45391196|45447139	13:79490411|79496843
4:38957345|38967502	13:46152753|46164484	13:79513343|79528439
12:53612425|53633146	13:46907904|46909314	13:79565620|79571122
2:47485144|47491725	13:46978757|46991892	13:81783159|81784515
16:18590468|18611479	13:46978757|47002023	13:82256891|82261474
X:28437952|28486118	13:46987049|47002023	13:82256891|82274534
1:108987039|108987802	13:47760569|47764526	13:82256891|82285635
18:11436848|11443952	13:47760569|47794947	13:82318869|82322181
3:114813776|114839309	13:50461899|50471621	13:82953747|82961056
9:295808|300977	13:50461899|50474243	13:82982327|82987202
2:91391185|91465447	13:50613884|50614695	13:83151533|83156879
3:13854403|13854615	13:50643756|50651009	13:83159181|83160799
12:43344730|43344939	13:50714324|50742186	13:83257014|83269283
AEMK02000258.1:276847|277808	13:52503349|52524507	13:83270062|83271995
2:8947587|8949544	13:53085574|53106944	13:83468032|83474843
5:13506832|13523181	13:53085574|53126405	13:86452535|86474319
8:96934264|96953154	13:53090589|53106944	13:89276695|89310673
4:97661383|97670174	13:61681808|61687986	13:89304739|89321227
15:82977073|82977955	13:64023546|64024481	13:89313610|89321227
5:35632406|35633470	13:65289860|65330679	13:90108498|90137838
8:132610461|132678767	13:65312475|65330679	13:90798827|90802075
4:90235723|90238988	13:65374802|65376965	13:91368437|91378095
2:78894699|78896781	13:65401048|65408076	13:92652259|92662887
1:126930347|126942068	13:65957292|65967418	13:94162898|94254704
6:92185833|92197354	13:66114472|66116302	13:94234471|94254704
1:4775755|4843415	13:66228491|66231124	13:94238611|94254704
7:22889305|22956239	13:66493801|66495580	13:94238611|94275035
14:139089180|139090191	13:67437822|67517641	13:94310914|94312044
8:47827948|47835130	13:67934546|67936021	13:94319174|94320360
11:4337374|4345913	13:68595006|68611602	13:94333253|94342554
7:80343073|80346071	13:68599627|68611602	13:94336123|94338366
17:40253732|40256075	13:68611370|68611602	13:95696483|95703536
13:79494911|79496843	13:68820770|68821056	13:95696483|95709483
1:45173524|45177436	13:69223492|69228869	13:95702963|95703536
1:169840581|169860179	13:69651255|69668224	13:95702963|95709483
1:175300727|175309846	13:70406477|70408175	13:95760812|95775714
4:88723352|88732517	13:70778196|70779817	13:95766107|95803142
8:111823361|111839842	13:71794794|71797638	13:95786312|95803142
12:31358562|31388511	13:72116572|72118925	13:97912254|97913066
2:136895593|136896075	13:73237139|73239444	13:97912254|97995384
15:106233837|106246706	13:73294632|73295032	13:99987011|100035111
5:85203059|85239628	13:73619280|73631399	13:100053038|100066548
6:170449954|170456107	13:73844884|73847800	13:100214973|100216874
17:49266025|49281294	13:73868106|73880623	13:107080757|107085025
15:78065298|78070200	13:73879907|73892682	13:108671003|108677607
1:216398782|216420611	13:73882476|73890683	13:108800991|108829633
6:70102566|70103372	13:73892522|73895711	13:108810158|108829633
6:106730357|106771048	13:74791083|74825563	13:108816286|108820326
14:35484129|35487748	13:74943688|74944461	13:108816286|108829633
15:93199516|93243693	13:75615215|75645292	13:108816286|108854260
9:109411982|109431724	13:75615215|75652667	13:108842609|108851599
13:66833170|66918332	13:77068767|77075075	13:108851501|108854260
9:74894560|74896681	13:77255763|77289518	13:108851501|108880840
12:11669306|11672541	13:77255800|77289518	13:108874660|108880840
4:76581881|76634942	13:77368876|77445610	13:108951348|108963151
3:23862265|23865258	13:77614171|77656080	13:108958194|108963151
1:54462732|54529700	13:79476250|79496843	13:110198154|110230743
15:120712306|120712571	13:79490411|79496843	13:110230615|110250357
7:60731692|60757895	13:79513343|79528439	13:110267871|110272226
15:37807312|37823387	13:79565620|79571122	13:110770451|110789120
10:59913525|59919743	13:81783159|81784515	13:110827456|110840910
12:42592878|42596350	13:82256891|82261474	13:117240823|117241978
AEMK02000602.1:99346|104496	13:82256891|82274534	13:120756800|120765156
5:82311174|82311941	13:82256891|82285635	13:120756800|120779879
10:12407369|12422198	13:82318869|82322181	13:120919103|120935351
14:71993896|72011017	13:82953747|82961056	13:120931036|120935351
6:35193518|35195663	13:82982327|82987202	13:120987445|121006776
9:33731308|33732436	13:83151533|83156879	13:121003053|121006776
3:4256520|4279580	13:83159181|83160799	13:121052113|121059064
1:82875117|82891579	13:83257014|83269283	13:121570082|121577363
12:39860278|39865948	13:83267113|83270254	13:121570082|121596427
10:32855276|32862936	13:83270062|83271995	13:121571994|121577363
6:115000130|115000687	13:83468032|83474843	13:121571994|121596427
3:56988016|56989051	13:86452535|86474319	13:121576383|121577363
2:131814219|131829296	13:89276695|89310673	13:121576383|121589673
9:104937948|104965029	13:89304739|89321227	13:121576383|121596427
7:45579462|45664025	13:89313610|89321227	13:121657053|121670622
7:58112449|58123585	13:90108498|90137838	13:121798856|121802974
18:31399094|31402518	13:90798827|90802075	13:121801041|121802974
14:72000256|72011017	13:91368437|91378095	13:121802237|121802974
8:136568711|136582462	13:92652259|92662887	13:122727540|122750151
6:43867657|43870512	13:94162898|94254704	13:122727540|122799645
3:113091745|113162662	13:94234471|94254704	13:122727540|122815400
4:90161231|90163552	13:94238611|94254704	13:123437550|123438399
15:118320252|118327364	13:94238611|94275035	13:123437550|123452720
1:53396207|53413955	13:94310914|94312044	13:123437550|123460730
6:91593753|91596635	13:94319174|94320360	13:123445565|123447842
X:40595987|40634199	13:94333253|94342554	13:123507119|123510745
14:76818727|76822013	13:94336123|94338366	13:123517976|123520235
2:136907206|136916014	13:95696483|95703536	13:123519963|123522805
1:250042850|250058264	13:95696483|95709483	13:123716429|123716667
3:122089927|122094251	13:95702963|95703536	13:123716429|123737809
3:107587063|107613737	13:95702963|95709483	13:124508949|124511537
14:55301204|55308756	13:95760812|95775714	13:124510741|124511537
13:83143347|83144616	13:95766107|95803142	13:124521558|124534067
2:136907206|136907907	13:95786312|95803142	13:124524484|124534067
13:153600606|153611708	13:96676183|96819704	13:124532390|124534067
8:130319353|130324566	13:97912254|97913066	13:124532390|124546019
4:19360870|19379944	13:97912254|97995384	13:124545847|124552428
6:58174845|58175346	13:99987011|100035111	13:124784931|124807586
6:37077213|37166517	13:100053038|100066548	13:125959242|126013836
12:60348042|60361193	13:100214973|100216874	13:126204996|126205688
2:66211250|66211470	13:107080757|107085025	13:127442412|127456347
15:63700727|63721763	13:108671003|108677607	13:128673790|128690839
15:46643936|46659195	13:108800991|108829633	13:130504723|130520301
13:40124693|40126216	13:108810158|108829633	13:130630427|130631670
6:85443615|85455350	13:108816286|108820326	13:131421012|131452941
2:108740005|108760749	13:108816286|108829633	13:131431707|131452941
7:86055233|86087677	13:108816286|108854260	13:131590495|131596912
8:135780981|135786172	13:108842609|108851599	13:132302321|132314552
5:7549899|7550897	13:108851501|108854260	13:132314440|132337788
2:136907206|136933834	13:108851501|108880840	13:132321056|132329285
7:64896440|64900770	13:108874660|108880840	13:132321056|132337788
2:139667045|139736914	13:108951348|108963151	13:132325910|132337788
13:157446519|157449706	13:108958194|108963151	13:132366435|132377669
17:14795747|14796267	13:110198154|110230743	13:132831927|132837247
2:132325084|132382906	13:110230615|110250357	13:132945576|132975398
15:124587035|124602627	13:110257427|110283321	13:132960754|132975398
4:112021197|112028684	13:110267871|110272226	13:132986164|132995932
3:114541805|114573941	13:110770451|110789120	13:133296684|133305955
14:113258016|113261275	13:110827456|110840910	13:133296684|133312344
6:109061486|109082598	13:117240823|117241978	13:133302378|133312344
14:106978414|106988787	13:120756800|120765156	13:133308842|133312344
2:6756415|6756573	13:120756800|120779879	13:133710723|133727006
1:108459471|108468465	13:120919103|120935351	13:133715518|133727006
7:86024175|86032780	13:120931036|120935351	13:133976765|133981842
3:126871893|126883162	13:120987445|121006776	13:133984022|133987630
4:106159830|106162890	13:121003053|121006776	13:134233747|134234461
9:45687564|45691000	13:121027424|121059064	13:134379236|134396257
1:193989473|194001690	13:121052113|121059064	13:134387068|134389734
4:79718560|79719089	13:121570082|121577363	13:134481486|134491192
4:81156524|81172586	13:121570082|121596427	13:134515277|134527329
2:4250643|4252020	13:121571994|121577363	13:134624946|134633963
13:45391196|45447139	13:121571994|121596427	13:134838956|134857989
12:39310277|39311632	13:121576383|121577363	13:134838956|134868441
3:26215906|26224521	13:121576383|121589673	13:134998506|135020313
3:101478346|101480235	13:121576383|121596427	13:135007591|135020313
6:17352018|17379293	13:121657053|121670622	13:135019965|135020313
6:74829110|74840664	13:121798856|121802974	13:135019965|135062178
1:202188216|202225299	13:121801041|121802974	13:135736998|135739109
13:123716429|123737809	13:121802237|121802974	13:137185110|137240863
9:10247446|10258500	13:122727540|122750151	13:137336049|137342929
8:114171610|114247194	13:122727540|122799645	13:137373443|137376721
17:39167686|39169959	13:122727540|122815400	13:138067177|138073936
13:200704929|200731785	13:122788149|122802413	13:138771379|138790284
4:97552286|97576948	13:123437550|123438399	13:140332549|140347934
5:16309169|16320268	13:123437550|123452720	13:140502583|140520271
10:29300932|29304243	13:123437550|123460730	13:140731010|140750477
17:35461000|35469692	13:123445565|123447842	13:140805618|140811588
15:95536052|95562038	13:123507119|123510745	13:140805618|140817139
8:101863239|101864592	13:123517976|123520235	13:141259956|141265452
15:54405977|54411041	13:123519963|123522805	13:141284326|141287865
3:77916176|77928476	13:123716429|123716667	13:144016399|144085837
13:43718623|43733504	13:123716429|123737809	13:145481362|145482246
1:253012174|253014268	13:124508949|124511537	13:146005476|146078858
10:20469603|20492105	13:124510741|124511537	13:146058078|146066269
5:82217689|82274529	13:124521558|124534067	13:146058078|146078858
5:67674585|67681947	13:124524484|124534067	13:146367423|146368697
4:105822618|105823970	13:124532390|124534067	13:146421223|146428798
3:96116880|96124120	13:124532390|124546019	13:146421223|146435567
12:11125279|11132890	13:124545847|124552428	13:146421223|146438569
14:55770332|55799718	13:124784931|124807586	13:147535545|147565603
2:80660878|80689019	13:125857905|126013836	13:147539591|147574197
11:21766755|21793730	13:125959242|126013836	13:147814768|147839301
14:104137182|104152190	13:126204996|126205688	13:147819550|147839301
6:60695388|60695898	13:127442412|127456347	13:147837956|147839301
7:69805626|69828037	13:128673790|128690839	13:147878447|147879794
3:18227611|18234813	13:130504723|130520301	13:148496646|148534946
6:150318008|150327391	13:130630427|130631670	13:148517273|148534946
6:42922694|42927542	13:131421012|131452941	13:148517273|148535551
4:44625779|44711128	13:131431707|131452941	13:148522545|148534946
13:201121683|201139242	13:131590495|131596912	13:148522545|148535551
10:57201061|57236044	13:132302321|132314552	13:150800036|150847269
13:29956791|29960782	13:132314440|132337788	13:150847225|150854089
1:144967552|144968613	13:132321056|132329285	13:150872813|150890353
7:59825467|59829263	13:132321056|132337788	13:151797392|151818699
7:23204849|23205935	13:132325910|132337788	13:151811869|151818699
AEMK02000697.1:144164|144932	13:132366435|132377669	13:153594924|153611708
18:5252444|5254144	13:132831927|132837247	13:153818741|153839132
11:713800|716256	13:132945576|132975398	13:157589373|157600510
1:141920484|141983609	13:132960754|132975398	13:157589373|157628266
3:106129889|106144179	13:132986164|132995932	13:157615688|157628266
18:44996263|45015134	13:133296684|133305955	13:157683719|157702233
15:137060700|137063159	13:133296684|133312344	13:157715016|157731436
1:83018121|83025603	13:133302378|133312344	13:158599501|158613577
1:238594023|238609475	13:133308842|133312344	13:158683519|158686017
1:253131828|253148863	13:133710723|133727006	13:158683519|158688234
3:53305760|53308710	13:133715518|133727006	13:158683519|158693886
5:94431192|94442595	13:133976765|133981842	13:158685847|158688234
X:64330107|64388192	13:133984022|133987630	13:160181594|160204381
X:94406655|94416998	13:134233747|134234461	13:160189396|160204381
6:31873092|31874009	13:134379236|134396257	13:163069023|163075891
9:116495349|116532307	13:134387068|134389734	13:165850549|165891486
16:20535673|20538180	13:134481486|134491192	13:166713788|166714962
9:46311023|46311307	13:134515277|134527329	13:166836891|166837551
5:18172596|18173110	13:134624946|134633963	13:167824035|167842322
6:34743079|34747797	13:134838956|134857989	13:173686827|173770537
7:4619976|4622860	13:134838956|134868441	13:173763340|173770537
17:31812189|31817495	13:134998506|135020313	13:173821241|173834075
9:88762439|88764377	13:135007591|135020313	13:177438129|177474540
14:120983127|120994307	13:135019965|135020313	13:177453132|177474540
6:95104930|95114096	13:135019965|135062178	13:180606799|180638334
3:114685738|114693539	13:135736998|135739109	13:192312420|192314069
15:15928996|15941387	13:137185110|137240863	13:192380631|192398963
13:157683719|157702233	13:137336049|137342929	13:195361319|195364404
9:127846015|127858072	13:137373443|137376721	13:197054745|197067577
1:215754530|215771774	13:138067177|138073936	13:197138888|197142966
12:51619119|51636844	13:138771379|138790284	13:199922484|199926019
13:39864067|39866578	13:140332549|140347934	13:199943264|199946821
9:34493529|34496360	13:140502583|140520271	13:200012496|200018021
11:8712697|8730803	13:140731010|140750477	13:200012507|200018021
1:129659979|129662208	13:140805618|140811588	13:200017893|200020785
15:104633569|104650579	13:140805618|140817139	13:200578707|200588242
AEMK02000328.1:334734|342617	13:140805618|140827196	13:200704929|200731785
12:11098684|11135635	13:141259956|141265452	13:200707866|200718953
2:84421005|84432962	13:141284326|141287865	13:200707866|200721908
3:126893619|126899503	13:144016399|144085837	13:200707866|200731785
14:106961380|106988787	13:145481362|145482246	13:200708916|200718953
12:59319172|59331703	13:145888937|145924776	13:200731731|200749144
4:79710433|79715805	13:146005476|146078858	13:200731731|200752458
6:15860537|15863316	13:146058078|146066269	13:200731731|200759988
2:141219340|141227168	13:146058078|146078858	13:200731731|200766047
7:38438110|38439128	13:146367423|146368697	13:200773854|200779336
X:57394775|57396709	13:146421223|146428798	13:201043326|201068601
14:125166873|125181216	13:146421223|146435567	13:201067069|201068601
9:56044142|56068731	13:146421223|146438569	13:201067069|201121879
9:10163947|10258500	13:147535545|147565603	13:202796617|202807630
7:42252170|42277101	13:147539591|147574197	13:202799807|202808210
8:77525036|77527073	13:147814768|147839301	13:202806712|202807630
17:52974200|52987592	13:147819550|147839301	13:202827128|202827455
4:94436827|94438667	13:147837956|147839301	13:202847711|202875571
1:190672034|190672800	13:147878447|147879794	13:202865202|202875571
4:9102988|9104901	13:148496646|148534946	13:202874107|202875571
7:121661478|121661871	13:148517273|148534946	13:203325937|203330171
15:100571652|100582525	13:148517273|148535551	13:204638612|204671119
3:43522634|43536562	13:148522545|148534946	13:206640466|206641098
9:36495729|36499710	13:148522545|148535551	13:206959483|206970402
16:21449905|21451895	13:150800036|150847269	13:206986084|206987084
5:3405618|3411214	13:150847225|150854089	13:206986084|206990757
3:80418060|80440141	13:150872813|150890353	14:919880|920515
14:58280692|58291727	13:151771179|151782014	14:944149|945397
4:110411073|110422382	13:151797392|151818699	14:2843131|2861536
7:68353570|68373049	13:151811869|151818699	14:3166315|3185555
4:30808728|30818482	13:153594924|153611708	14:3916866|3919973
1:18978280|18995804	13:153818741|153839132	14:3916866|3931311
3:18229955|18230266	13:157589373|157600510	14:3916866|3998958
3:16964040|16971275	13:157589373|157628266	14:4302626|4304316
3:47004817|47007039	13:157615688|157628266	14:6671194|6673572
6:95200421|95206205	13:157683719|157702233	14:6677140|6680524
13:120824711|120850194	13:157715016|157731436	14:6745390|6746054
15:16258946|16277686	13:158175831|158184952	14:6745390|6754347
2:26516504|26518029	13:158599501|158613577	14:6745390|6783462
2:3117388|3122194	13:158683519|158686017	14:6754236|6771753
15:19942032|19966297	13:158683519|158688234	14:6766438|6771753
1:271368904|271384260	13:158683519|158693886	14:7274779|7366519
5:104314075|104367080	13:158685847|158688234	14:7274779|7366524
11:3193839|3208876	13:160181594|160204381	14:7352555|7366524
5:85179173|85194903	13:160189396|160204381	14:8428911|8436506
6:44621910|44623111	13:163069023|163075891	14:8428911|8437573
4:67679793|67689219	13:165850549|165891486	14:8430690|8434622
17:63037555|63038892	13:166713788|166714962	14:9306169|9309952
6:31867238|31867964	13:166836891|166837551	14:9378192|9382024
13:35084780|35101407	13:167824035|167842322	14:9478895|9480356
12:36362691|36367060	13:173686827|173770537	14:9478895|9498411
8:133788930|133797336	13:173763340|173770537	14:9478895|9505715
15:76166995|76170355	13:173821241|173834075	14:9497312|9498411
8:43732762|43739096	13:177438129|177474540	14:9497312|9505715
3:40446251|40490735	13:177453132|177474540	14:10274719|10282767
5:7341106|7370985	13:180606799|180638334	14:11381767|11390466
14:105866977|105893750	13:192312420|192314069	14:11850183|11883637
17:11770294|11770489	13:192313856|192351974	14:11850183|11892147
4:67940259|67955626	13:192380631|192398963	14:11891954|11908167
6:169039355|169047805	13:195361319|195364404	14:11902656|11908167
13:121801041|121802974	13:196257846|196261845	14:11905048|11908167
14:42253835|42256518	13:197054745|197067577	14:12777090|12794559
1:149258310|149272247	13:197138888|197142966	14:12777090|12837511
3:42881922|42887048	13:199922484|199926019	14:12826402|12837511
2:85462737|85518807	13:199943264|199946821	14:13015550|13083802
4:48729887|48776275	13:200012496|200018021	14:14486402|14492611
4:73962947|73981634	13:200012507|200018021	14:14989270|14992789
6:166273186|166299863	13:200017893|200020785	14:20214951|20238937
15:106414678|106431085	13:200578707|200588242	14:20270674|20282065
13:130504723|130520301	13:200704929|200731785	14:20521354|20522546
15:101878521|101883548	13:200707866|200718953	14:22572451|22577570
2:46435587|46455592	13:200707866|200721908	14:23351791|23359125
3:96260810|96267713	13:200707866|200731785	14:29144281|29147546
8:112278893|112313657	13:200708916|200718953	14:29264443|29286077
18:49136964|49138334	13:200731731|200749144	14:29273521|29290551
1:268861426|268885969	13:200731731|200752458	14:29281864|29290551
8:119675947|119720021	13:200731731|200759988	14:29372628|29374960
9:44217773|44218170	13:200731731|200766047	14:29444013|29445557
5:53633123|53669181	13:200773854|200779336	14:29673474|29684479
8:116014634|116022036	13:201043326|201068601	14:29673474|29710591
3:107127683|107151869	13:201067069|201068601	14:29674052|29689007
5:77670321|77675877	13:201067069|201121879	14:29676249|29684479
13:2799779|2816507	13:202796617|202807630	14:29689597|29696108
1:203461861|203474881	13:202799807|202808210	14:29689597|29707757
9:41367955|41374298	13:202806712|202807630	14:29689597|29716650
3:73046115|73062667	13:202827128|202827455	14:29695893|29718818
17:19499593|19505138	13:202847711|202875571	14:30269633|30281504
9:109452442|109453286	13:202865202|202875571	14:30369234|30371552
1:20792929|20798556	13:202874107|202875571	14:31436767|31444026
1:94557868|94561324	13:203325937|203330171	14:31548156|31581475
14:49893788|49901871	13:204638612|204671119	14:31570651|31614417
12:21118219|21141475	13:206640466|206641098	14:31715996|31720137
8:27943377|27944426	13:206959483|206970402	14:32576253|32577961
5:43168056|43171193	13:206986084|206987084	14:32697874|32701663
13:147878447|147879794	13:206986084|206990757	14:32709878|32734205
5:101579751|101600460	14:919880|920515	14:32734055|32737056
11:14579873|14590548	14:944149|945397	14:35484129|35487748
14:111073462|111074594	14:2843131|2861536	14:36312060|36332576
15:118367910|118411610	14:3166315|3185555	14:39253307|39261600
15:128371748|128373809	14:3916866|3919973	14:39651467|39668306
13:22318659|22320201	14:3916866|3931311	14:40492252|40502723
2:114338109|114371287	14:3916866|3998958	14:40712179|40715025
16:21519866|21540786	14:4302626|4304316	14:40965365|40973265
3:24198694|24210767	14:6671194|6673572	14:41428540|41438049
15:46394953|46405687	14:6677140|6680524	14:41430507|41438049
X:111378034|111414313	14:6745390|6746054	14:41636873|41643575
6:158413637|158426478	14:6745390|6754347	14:41775937|41778345
7:2915755|2916421	14:6745390|6783462	14:42134025|42135445
2:85895664|85901430	14:6754236|6771753	14:45490289|45490796
10:32840622|32843863	14:6766438|6771753	14:45602199|45612963
3:69529758|69534570	14:7274779|7366519	14:45949202|45960223
18:54336795|54404485	14:7274779|7366524	14:46982871|46996102
3:117306684|117307388	14:7352555|7366524	14:48029199|48031837
15:54941029|54945702	14:8428911|8436506	14:48134655|48143955
2:82132067|82137277	14:8428911|8437573	14:48137096|48143955
13:160165781|160204381	14:8430690|8434622	14:48427779|48446618
Y:9399938|9412747	14:9306169|9309952	14:49359963|49380521
X:64344586|64346816	14:9378192|9382024	14:49403144|49424492
14:135367778|135374679	14:9478895|9480356	14:50139933|50141823
6:85509890|85513240	14:9478895|9498411	14:50721468|50724385
6:136635008|136636840	14:9478895|9505715	14:52088003|52130472
18:16349012|16351591	14:9497312|9498411	14:53930629|53931884
5:83645870|83662851	14:9497312|9505715	14:54538637|54540350
1:87210273|87212987	14:10274719|10282767	14:54538637|54541433
11:21351565|21360350	14:11381767|11390466	14:54538644|54541433
2:42861755|42864865	14:11850183|11883637	14:55105293|55105756
13:31860096|31871832	14:11850183|11892147	14:55136734|55155601
8:29136919|29155524	14:11891954|11908167	14:55301204|55308756
13:73619280|73631399	14:11902656|11908167	14:55341575|55343743
15:94016853|94019208	14:11905048|11908167	14:55547865|55557763
15:91666223|91684121	14:12777090|12794559	14:55549471|55553080
2:50831116|50831660	14:12777090|12837511	14:55583796|55599982
3:54832393|54850266	14:12826402|12837511	14:55770332|55789427
12:20126112|20129339	14:13015550|13083802	14:55770332|55799718
X:94542281|94559701	14:14486402|14492611	14:55770332|55802841
12:36103170|36105578	14:14989270|14992789	14:55880862|55886147
13:30495982|30524999	14:20214951|20238937	14:55985016|56002445
8:110390839|110404477	14:20270674|20282065	14:56018601|56032249
5:32950689|32956888	14:20281913|20309806	14:56073932|56077868
8:47793837|47801426	14:20521354|20522546	14:56675693|56691085
3:4177764|4264363	14:22572451|22577570	14:56675693|56702514
4:36969987|37026970	14:23351791|23359125	14:58236763|58238484
10:48347997|48348443	14:29144281|29147546	14:58308854|58310780
14:105160374|105167488	14:29264443|29286077	14:58836339|58840822
14:76336012|76349548	14:29273521|29290551	14:59432075|59439450
13:132926867|133023430	14:29281864|29290551	14:60813334|60813820
18:13761465|13765569	14:29372628|29374960	14:60900305|60901112
14:77706066|77706658	14:29444013|29445557	14:60962605|60966247
14:71765050|71773116	14:29673474|29684479	14:61002771|61016166
2:90663520|90664918	14:29673474|29710591	14:61389331|61400625
13:97912254|97995384	14:29674052|29689007	14:62078495|62104376
13:10765898|10778469	14:29676249|29684479	14:62602234|62608494
17:13915646|13946282	14:29689597|29696108	14:63449090|63450254
X:101536063|101553659	14:29689597|29707757	14:63660697|63681591
16:20018930|20020259	14:29689597|29716650	14:64367918|64368587
13:139983149|139993643	14:29695893|29718818	14:64902328|64908351
2:71609783|71610202	14:30269633|30281504	14:65553620|65561620
14:73745435|73759656	14:30369234|30371552	14:66658382|66664149
10:63899363|63912175	14:31436767|31444026	14:71093567|71097952
15:105113267|105131629	14:31548156|31581475	14:71219663|71239477
6:111535914|111538630	14:31570651|31614417	14:71228077|71239477
7:58137959|58146958	14:31715996|31720137	14:71491530|71493586
8:37832561|37866261	14:32576253|32577961	14:71491530|71494146
1:267525106|267603690	14:32697874|32701663	14:71491530|71495730
7:103691093|103713558	14:32709878|32734205	14:71521813|71524495
2:140745891|140757554	14:32734055|32737056	14:71526190|71535450
9:109411982|109412809	14:35484129|35487748	14:71615773|71625769
3:26749846|26751512	14:36061799|36243162	14:71765050|71767362
1:129651197|129662208	14:36101382|36243162	14:71765050|71773116
13:34727492|34741849	14:36312060|36332576	14:71844195|71853159
8:87130575|87132120	14:38744329|38749049	14:71844195|71857332
10:42509363|42510787	14:39253307|39261600	14:71844195|71861362
8:74603308|74604427	14:39651467|39668306	14:71844195|71867347
14:133890727|133900924	14:40492252|40502723	14:71850580|71857332
2:149681914|149706426	14:40712179|40715025	14:71852747|71853159
1:203536417|203546467	14:40965365|40973265	14:71881656|71882377
4:108685997|108691164	14:41428540|41438049	14:71999543|72011017
6:74838311|74840664	14:41430507|41438049	14:72000256|72004798
1:241979948|241998014	14:41636873|41643575	14:72044646|72048880
6:80958369|80960170	14:41775937|41778345	14:72355046|72369234
1:271368900|271392558	14:41775937|41791435	14:72355046|72405160
3:113127816|113169452	14:42134025|42135445	14:72426644|72427752
12:53651144|53692579	14:45227613|45245328	14:73501554|73538241
9:66405629|66409132	14:45490289|45490796	14:73745435|73759656
3:131272241|131272989	14:45602199|45612963	14:73752038|73759656
15:66664434|66683291	14:45949202|45960223	14:75001609|75025043
13:124524484|124534067	14:46982871|46996102	14:75247422|75295452
5:100294418|100311221	14:48029199|48031837	14:75855449|75897301
5:53800102|53833224	14:48134655|48143955	14:75890549|75897301
10:22806071|22812591	14:48137096|48143955	14:75895155|75897301
2:114706886|114710012	14:48427779|48446618	14:76369984|76377709
3:80518276|80524955	14:49359963|49380521	14:76486443|76487631
17:40237039|40253898	14:49403144|49424492	14:77415234|77419754
11:50762620|50773425	14:50139933|50141823	14:77530742|77560359
8:130257256|130264004	14:50721468|50724385	14:79362504|79364310
13:1464115|1467192	14:52088003|52130472	14:80294676|80294935
14:77530742|77560359	14:53930629|53931884	14:80431028|80432888
6:135134112|135160039	14:54538637|54540350	14:83494042|83496465
12:59821853|59822490	14:54538637|54541433	14:85576061|85579362
12:14478611|14488093	14:54538644|54541433	14:87501721|87508558
7:68401378|68402796	14:55105293|55105756	14:87559680|87560723
9:104977276|104978823	14:55136734|55155601	14:87984301|87991635
2:4456428|4459058	14:55301204|55308756	14:87989316|87991635
12:18606802|18607152	14:55341575|55343743	14:89065561|89075561
3:78952890|78958596	14:55547865|55557763	14:90007855|90013460
1:266229840|266296602	14:55549471|55553080	14:90472132|90474888
15:103552715|103554701	14:55583796|55599982	14:90510793|90511831
1:253034155|253056412	14:55770332|55789427	14:90510793|90512701
3:46501334|46506202	14:55770332|55799718	14:90616436|90618550
1:242242621|242259806	14:55770332|55802841	14:91999238|92097348
17:37900616|37901251	14:55880862|55886147	14:92396506|92409653
5:99299351|99335687	14:55985016|56002445	14:99777610|99777965
12:43513795|43538347	14:56018601|56032249	14:99835049|99845071
7:115586975|115604565	14:56073932|56077868	14:99992348|99994629
14:29674052|29689007	14:56675693|56691085	14:103438795|103446610
12:36362691|36372744	14:56675693|56702514	14:103551372|103564282
8:16728875|16732088	14:58236763|58238484	14:103553553|103564282
1:166036953|166044981	14:58308854|58310780	14:103553553|103570513
12:11202344|11212882	14:58836339|58840822	14:103573397|103593505
8:112677571|112678436	14:59432075|59439450	14:103704916|103796836
14:103551372|103579176	14:60813334|60813820	14:104064308|104070594
14:110846107|110865706	14:60900305|60901112	14:105160374|105167488
X:47784503|47826089	14:60962605|60966247	14:105458770|105460324
14:14590352|14595341	14:61002771|61016166	14:105787886|105788384
3:107135278|107141679	14:61389331|61400625	14:105794106|105797612
X:96997114|96998433	14:62078495|62104376	14:105866977|105873711
12:7592600|7595678	14:62602234|62608494	14:105866977|105878686
17:14449679|14470236	14:63449090|63450254	14:105866977|105898517
17:11946296|11950659	14:63660697|63681591	14:105866977|105902806
2:144609015|144612731	14:64367918|64368587	14:105893635|105902806
5:85285642|85286475	14:64902328|64908351	14:105901068|105911675
14:9306169|9309952	14:65553620|65561620	14:106192641|106285529
X:101429695|101429862	14:66658382|66664149	14:106294756|106306036
6:80068941|80087801	14:71093567|71097952	14:106919329|106927209
13:95698444|95703536	14:71219663|71239477	14:106961380|106978586
17:49278762|49281294	14:71228077|71239477	14:106961380|106988787
6:138964559|138981411	14:71491530|71493586	14:107211572|107217670
1:266014574|266018477	14:71491530|71494146	14:107993201|108013871
10:42147410|42194913	14:71491530|71495730	14:108009637|108013871
9:121607065|121617143	14:71521813|71524495	14:109537602|109559679
13:202806712|202807630	14:71526190|71535450	14:110981135|110982816
2:79002338|79010277	14:71615773|71625769	14:111061753|111068707
3:38718327|38751074	14:71765050|71767362	14:111118446|111120455
3:93119516|93150924	14:71765050|71773116	14:111253510|111282469
6:54200798|54201346	14:71844195|71853159	14:111282328|111290117
11:675689|676545	14:71844195|71857332	14:111288486|111290117
12:11098684|11142803	14:71844195|71861362	14:111326577|111340111
8:82919677|82957656	14:71844195|71867347	14:112008240|112010254
5:22008784|22009750	14:71850580|71857332	14:112705127|112714985
12:48532439|48543642	14:71852747|71853159	14:112711277|112712035
5:68072367|68075752	14:71881656|71882377	14:112836925|112844150
1:227999397|228037829	14:71999543|72011017	14:113680007|113699582
7:91622714|91636049	14:72000256|72004798	14:114541451|114575408
8:87653808|87659118	14:72044646|72048880	14:121310320|121320413
9:72395044|72395639	14:72355046|72369234	14:121316588|121318744
1:77268674|77279692	14:72355046|72405160	14:121316588|121320413
4:122588007|122594631	14:72426644|72427752	14:121395348|121396290
9:104960017|104965029	14:73501554|73538241	14:121395348|121410754
6:19168552|19184536	14:73745435|73759656	14:121480127|121551093
4:125780952|125783720	14:73752038|73759656	14:125166873|125175655
6:62633610|62642964	14:75001609|75025043	14:125166873|125181216
12:22606823|22607386	14:75247422|75295452	14:125533200|125602478
6:135610702|135660642	14:75855449|75897301	14:125707566|125716203
15:133185673|133218757	14:75890549|75897301	14:127083428|127103878
3:58562793|58566706	14:75895155|75897301	14:128729497|128730587
4:88723352|88740487	14:76369984|76377709	14:128997093|129000284
6:67634953|67640257	14:76486443|76487631	14:129447569|129449114
11:18280391|18284134	14:77415234|77419754	14:129647376|129655287
3:26205620|26205774	14:77530742|77560359	14:129676706|129679211
4:2678086|2678726	14:79362504|79364310	14:129687511|129696020
1:112985922|113013582	14:80294676|80294935	14:129793503|129801497
1:36964151|36994867	14:80431028|80432888	14:130340730|130348234
15:45014628|45018907	14:83494042|83496465	14:131238819|131262177
X:111813679|111824862	14:85576061|85579362	14:131454717|131523424
18:10004185|10005271	14:87501721|87508558	14:131495285|131576631
3:23692700|23704670	14:87559680|87560723	14:131523392|131576631
2:69560544|69565336	14:87984301|87991635	14:131556704|131576631
1:217643588|217644074	14:87989316|87991635	14:131560094|131576631
1:219193192|219198006	14:89065561|89075561	14:131989399|132000084
16:64257835|64266685	14:90007855|90013460	14:132214062|132214715
4:107843864|107848522	14:90472132|90474888	14:132485606|132488764
6:85664602|85677583	14:90510793|90511831	14:133254329|133257256
10:39610261|39625476	14:90510793|90512701	14:133488931|133497213
6:110753545|110758296	14:90616436|90618550	14:133488931|133528266
10:65179075|65193640	14:91999238|92097348	14:133810299|133813901
13:39104468|39111421	14:92396506|92409653	14:134281823|134282673
11:19253377|19274010	14:99777610|99777965	14:134376834|134438668
4:129368386|129385680	14:99835049|99845071	14:135053658|135056973
2:89359613|89384364	14:99992348|99994629	14:136258011|136271400
7:68176044|68180716	14:102568157|102579850	14:136274382|136285139
6:14736586|14783640	14:103438795|103446610	14:136307328|136335070
11:19250142|19270035	14:103551372|103564282	14:136410332|136412160
13:34870280|34884046	14:103553553|103564282	14:136678729|136684752
9:109381271|109381451	14:103553553|103570513	15:798470|812599
13:74892143|74948215	14:103573397|103593505	15:798470|825763
18:31065678|31065950	14:103704916|103796836	15:798470|828650
5:73631382|73653060	14:104064308|104070594	15:820187|827288
12:60316958|60376920	14:105137081|105147398	15:3663027|3700621
3:98056723|98074295	14:105143817|105147398	15:3913056|3943647
16:72086154|72090231	14:105160374|105167488	15:4136904|4150279
1:203730146|203739415	14:105458770|105460324	15:4139778|4150279
5:22655523|22673637	14:105787886|105788384	15:4207163|4211249
1:20908952|20913116	14:105794106|105797612	15:7586373|7591848
9:130372679|130384896	14:105866977|105873711	15:7736973|7785694
5:3310248|3313241	14:105866977|105878686	15:7751278|7785694
3:98047438|98064327	14:105866977|105898517	15:7782677|7785694
1:184303800|184317973	14:105866977|105902806	15:15866989|15878306
1:200899063|200922046	14:105893635|105902806	15:15866989|15880950
3:78952890|78971884	14:105901068|105911675	15:15928996|15941387
16:44513270|44521925	14:106192641|106285529	15:15931074|15935249
6:146614850|146616734	14:106294756|106306036	15:16184227|16197963
18:19157642|19165427	14:106919329|106927209	15:16192020|16193752
16:38313290|38313489	14:106961380|106978586	15:16192020|16197963
X:18027429|18038865	14:106961380|106988787	15:16340141|16342055
18:38309526|38320787	14:107211572|107217670	15:16443887|16447152
8:82957079|82957656	14:107592614|107615772	15:16786136|16788456
6:12234387|12237082	14:107993201|108013871	15:16804269|16814482
4:67679793|67689204	14:108009637|108013871	15:16847248|16852201
7:92869221|92899127	14:109537602|109559679	15:17028498|17037765
X:15042050|15056584	14:110981135|110982816	15:24851150|24868712
X:11330636|11352622	14:111061753|111068707	15:24857690|24868712
1:230259235|230277505	14:111118446|111120455	15:25128581|25143159
4:80977923|81047314	14:111253510|111282469	15:25140315|25143159
2:142190605|142213033	14:111282328|111290117	15:29932361|29939777
3:71545433|71546149	14:111288486|111290117	15:31163502|31203096
14:45490289|45490796	14:111326577|111340111	15:31176701|31203096
11:49203468|49210487	14:112008240|112010254	15:31176701|31223430
1:12041132|12043885	14:112705127|112714985	15:31182230|31203096
9:46038901|46044924	14:112711277|112712035	15:31199269|31223430
5:84007999|84034579	14:112836925|112844150	15:31342936|31387416
10:45992309|46006364	14:113680007|113699582	15:31417943|31435861
5:27152069|27163194	14:114541451|114575408	15:31417943|31473618
13:38526031|38545830	14:120993720|121001784	15:33441214|33441613
X:26646459|26669106	14:121310320|121320413	15:44768145|44769374
11:78382356|78383968	14:121316588|121318744	15:45014628|45018907
18:19602979|19606144	14:121316588|121320413	15:46247088|46248130
1:13972476|13974349	14:121395348|121396290	15:46294098|46315302
14:103594106|103610402	14:121395348|121410754	15:46643936|46659195
2:89079718|89081961	14:121480127|121551093	15:47026575|47030228
2:48881149|48917915	14:125166873|125175655	15:47450777|47510422
12:11098684|11125464	14:125166873|125181216	15:47548067|47558269
6:170449954|170467296	14:125533200|125602478	15:48094739|48096210
12:573171|585916	14:125707566|125716203	15:48175645|48195196
12:22608930|22610967	14:127083428|127103878	15:48192255|48192770
9:12162493|12166226	14:128729497|128730587	15:48271060|48277942
1:128288806|128295890	14:128997093|129000284	15:48273692|48283342
13:30516967|30524999	14:129447569|129449114	15:54027500|54037592
8:38273589|38282641	14:129647376|129655287	15:54031268|54037592
X:59846103|59900555	14:129676706|129679211	15:54054919|54063425
6:165729761|165731887	14:129687511|129696020	15:54310541|54312703
6:1446263|1472876	14:129793503|129801497	15:54398190|54416820
4:72636561|72643259	14:130340730|130348234	15:54402949|54416820
1:241979932|241998014	14:131238819|131262177	15:54405977|54411041
7:112405462|112411522	14:131454717|131523424	15:54405977|54416820
1:196101699|196127738	14:131454717|131576631	15:54488295|54497470
15:105906727|105912926	14:131495285|131576631	15:54941029|54945702
10:12407369|12417836	14:131523392|131576631	15:55536036|55538678
6:2564305|2574166	14:131556704|131576631	15:56502940|56520557
5:83981205|83982237	14:131560094|131576631	15:59169716|59185795
15:137748317|137749183	14:131989399|132000084	15:59171238|59180636
11:11696688|11704554	14:132187540|132203276	15:59180557|59185795
2:15860882|15870484	14:132214062|132214715	15:59218157|59230432
5:68118874|68119304	14:132485606|132488764	15:59562524|59570339
3:101765610|101780247	14:133254329|133257256	15:59564532|59570339
3:41896797|41908053	14:133488931|133497213	15:59570242|59618359
9:120903169|120904253	14:133488931|133528266	15:60396962|60403463
4:93738637|93750841	14:133810299|133813901	15:60397513|60403463
15:88202356|88213250	14:134281823|134282673	15:60404225|60414442
14:28137986|28142370	14:134376834|134438668	15:60405553|60414442
17:29169602|29172437	14:135053658|135056973	15:60407130|60414442
1:19643979|19654272	14:136258011|136271400	15:64771605|64777189
15:31417943|31473618	14:136274382|136285139	15:64771605|64795113
14:103573397|103593505	14:136307328|136335070	15:64788863|64795113
3:53073338|53077591	14:136410332|136412160	15:66000520|66027687
14:7274779|7366524	14:136635494|136648841	15:66069856|66081091
5:59999638|60069981	14:136678729|136684752	15:66203239|66211225
6:75399100|75399698	15:798470|812599	15:66208610|66211225
X:50845576|50845788	15:798470|825763	15:66267154|66299872
11:13233930|13249671	15:798470|828650	15:66291710|66299872
10:65179075|65191886	15:820187|827288	15:66292955|66299872
17:17591384|17604991	15:3663027|3700621	15:66353137|66357727
14:103553553|103564282	15:3913056|3943647	15:66664434|66676992
18:28746204|28755657	15:4136904|4150279	15:66664434|66680072
1:175409308|175443338	15:4139778|4150279	15:66664434|66683291
15:48094739|48096210	15:4207163|4211249	15:66905240|66937468
9:91770641|91777166	15:7586373|7591848	15:69042226|69046083
3:121944017|121988417	15:7736973|7785694	15:71262496|71263414
13:12626206|12633500	15:7751278|7785694	15:72431133|72450009
13:67476396|67477401	15:7782677|7785694	15:72462370|72492446
16:26690558|26698399	15:15866989|15878306	15:72462370|72495976
15:104019933|104021617	15:15866989|15880950	15:72607272|72611205
11:66535744|66536519	15:15928996|15941387	15:72952825|72968061
13:22000256|22004785	15:15931074|15935249	15:74668450|74673181
13:135019965|135062178	15:16184227|16193752	15:75334315|75335592
10:48911448|48916899	15:16184227|16197963	15:75944605|75945524
2:83875260|83904383	15:16192020|16193752	15:75944605|75949450
9:92384248|92397915	15:16192020|16197963	15:75944605|75953955
16:24175667|24179590	15:16340141|16342055	15:75944605|75956838
17:18298300|18304567	15:16443887|16447152	15:76166995|76170355
2:18980330|18982921	15:16786136|16788456	15:76166995|76177857
5:29660599|29663091	15:16804269|16814482	15:76177104|76192330
18:44996263|45020744	15:16847248|16852201	15:76192264|76216187
7:67554148|67580251	15:17028498|17037765	15:76248140|76266620
10:31295417|31297552	15:24851150|24868712	15:77126133|77127562
3:22603929|22604675	15:24857690|24868712	15:77203628|77283482
1:230250825|230280276	15:25128581|25143159	15:77219097|77231348
2:142195747|142213033	15:25140315|25143159	15:77219097|77283482
18:38307155|38320787	15:29932361|29939777	15:77221202|77283482
8:39008497|39040610	15:31163502|31203096	15:77226317|77234721
1:121217326|121228255	15:31176701|31203096	15:77226317|77283482
7:100586453|100590493	15:31176701|31223430	15:77227959|77231348
1:187388814|187391730	15:31182230|31203096	15:77234646|77283482
5:51657471|51668553	15:31199269|31223430	15:77249916|77283482
13:157615688|157628266	15:31249522|31260633	15:77251049|77283482
1:25523036|25528664	15:31342936|31387416	15:77504151|77551163
13:83468032|83474843	15:31417943|31435861	15:77920339|77942749
16:22546397|22576391	15:31417943|31473618	15:77937140|77942749
7:229160|292892	15:33441214|33441613	15:78065298|78070200
16:47882641|47883657	15:44768145|44769374	15:78613464|78620652
6:168796052|168858417	15:45014628|45018907	15:79975237|79976596
2:16597388|16601275	15:46247088|46248130	15:81017941|81037449
10:13395616|13399198	15:46294098|46315302	15:81780551|81799621
7:68514625|68521235	15:46643936|46659195	15:82974214|82976209
X:61688015|61702090	15:47026575|47030228	15:83190526|83194012
4:98864909|98866933	15:47450777|47510422	15:84220498|84225453
15:34317206|34326182	15:47548067|47558269	15:84220501|84225453
1:49894310|49919338	15:47755745|47780980	15:84830996|84849136
1:138468428|138472413	15:47775145|47780980	15:84830996|84870609
18:11092397|11133851	15:48094739|48096210	15:86556414|86561911
1:52123108|52179177	15:48175645|48195196	15:87408913|87409377
3:5208685|5219219	15:48192255|48192770	15:88202356|88213250
12:37636936|37649220	15:48271060|48277942	15:88210866|88211674
10:12471548|12479287	15:48273692|48283342	15:88482354|88486742
5:100325826|100373794	15:54027500|54037592	15:91510898|91514202
8:115437588|115463477	15:54031268|54037592	15:91512801|91514202
18:22910355|22913514	15:54054919|54063425	15:91660148|91666425
1:266981815|266999838	15:54310541|54312703	15:91678147|91684121
1:20821002|20826456	15:54398190|54416820	15:93199516|93223292
6:43867657|43879544	15:54402949|54416820	15:93199516|93243693
18:17859078|17912006	15:54405977|54411041	15:93205480|93243693
1:41083415|41101166	15:54405977|54416820	15:93222405|93243693
8:134931461|134941606	15:54488295|54497470	15:93992834|94001331
13:46513906|46521227	15:54941029|54945702	15:94016853|94019208
8:121046385|121047478	15:55536036|55538678	15:94340048|94344535
9:34461542|34496360	15:56502940|56520557	15:94340048|94357985
15:71124319|71142128	15:59169716|59185795	15:94387078|94413980
18:28702175|28746386	15:59171238|59180636	15:94432750|94446961
6:82196149|82196400	15:59180557|59185795	15:94830414|94839646
1:14791352|14792427	15:59218157|59230432	15:94830414|94848113
1:242111791|242113126	15:59562524|59570339	15:95042537|95044148
11:25318969|25343890	15:59564532|59570339	15:95259699|95275846
14:9478895|9498411	15:59570242|59618359	15:95536052|95562038
8:112685624|112686605	15:60396962|60403463	15:96002500|96013455
13:34824030|34825924	15:60397513|60403463	15:100164717|100170857
15:118313114|118327364	15:60404225|60414442	15:100164717|100202655
3:18512814|18513266	15:60405553|60414442	15:100571652|100572459
14:8392095|8401299	15:60407130|60414442	15:100781403|100790156
6:105568059|105588590	15:64771605|64777189	15:101024492|101083385
6:119795969|119803245	15:64771605|64795113	15:101878521|101883548
13:38503153|38512688	15:64788863|64795113	15:104019933|104021617
13:100193243|100202172	15:66000520|66027687	15:104633569|104650579
5:16534128|16568402	15:66069856|66081091	15:104639356|104650579
7:61121465|61137643	15:66203239|66211225	15:104799802|104815122
13:7071777|7073598	15:66208610|66211225	15:104799802|104830407
10:29227447|29230143	15:66267154|66299872	15:104862142|104883341
2:91768020|91784772	15:66291710|66299872	15:104880117|104889512
13:34777898|34791379	15:66292955|66299872	15:105107570|105123855
13:157589373|157600510	15:66353137|66357727	15:105113267|105123855
13:32059508|32059882	15:66664434|66676992	15:105192557|105215674
1:163026219|163042228	15:66664434|66680072	15:105263579|105266463
1:237126956|237127531	15:66664434|66683291	15:105351964|105363158
9:92497947|92501670	15:66905240|66937468	15:106074746|106076503
16:50437615|50446698	15:67994643|68014201	15:106128744|106130023
9:56044142|56114530	15:69042226|69046083	15:106414678|106420964
9:45877120|45880176	15:71262496|71263414	15:106414678|106431085
11:49322689|49353419	15:72431133|72450009	15:106414678|106437731
6:73151682|73166221	15:72462370|72492446	15:106414678|106465899
10:65592761|65639948	15:72462370|72495976	15:106420109|106431085
2:142280493|142282960	15:72607272|72611205	15:106420737|106431085
13:30516967|30547685	15:72952825|72968061	15:106437542|106465899
5:77117783|77118425	15:74459701|74574354	15:106444273|106460173
8:121143167|121144080	15:74668450|74673181	15:106444273|106465899
15:132080599|132099120	15:75334315|75335592	15:106582380|106592006
12:25974288|25984096	15:75921787|75925426	15:106622745|106646498
15:60397513|60403463	15:75944605|75945524	15:106701863|106721128
15:103560435|103575053	15:75944605|75948184	15:106867717|106882819
1:253024490|253056412	15:75944605|75949450	15:106955729|106961095
8:82633708|82634760	15:75944605|75953955	15:109314716|109316040
4:34708377|34742072	15:75944605|75956838	15:109323773|109326647
13:140805618|140817139	15:76166995|76170355	15:109323773|109337071
5:48581521|48642759	15:76166995|76177857	15:109415763|109441836
6:20414002|20417106	15:76177104|76192330	15:109428070|109436890
4:107828268|107853387	15:76192264|76216187	15:109428070|109441836
2:38993497|39012138	15:76248140|76266620	15:109436411|109441836
13:26682837|26686462	15:77126133|77127562	15:110727073|110742697
3:87281287|87307407	15:77182972|77283482	15:110885008|110899835
11:603753|604571	15:77203628|77283482	15:111159112|111160037
3:2814416|2831893	15:77219097|77231348	15:111348107|111349307
3:107147355|107150298	15:77219097|77283482	15:111409861|111418998
6:57193773|57195187	15:77221202|77283482	15:111419693|111432362
17:38308599|38313296	15:77226317|77234721	15:111419693|111436140
4:19360870|19367922	15:77226317|77283482	15:112808098|112870004
13:1313881|1327423	15:77227959|77231348	15:112808098|112896614
13:204638612|204671119	15:77234646|77283482	15:112840121|112870004
13:73897758|73898674	15:77249916|77283482	15:112840121|112896614
3:103072700|103087649	15:77251049|77283482	15:112844152|112896614
14:124490594|124491817	15:77504151|77551163	15:112895498|112896614
7:34623378|34623978	15:77920339|77942749	15:112952801|112965950
5:16654325|16657139	15:77937140|77942749	15:112958594|112965950
3:107609926|107636043	15:78065298|78070200	15:113311176|113327836
9:130372679|130409903	15:78613464|78620652	15:117071799|117095608
2:41964790|41991832	15:79975237|79976596	15:117621174|117627792
13:199943264|199946821	15:81017941|81037449	15:117658803|117665522
10:42192452|42194913	15:81767223|81799621	15:117662473|117665522
9:75875661|75905750	15:81780551|81799621	15:118313114|118327364
9:19875266|19880518	15:82974214|82976209	15:118320252|118327364
10:23313239|23321391	15:83190526|83194012	15:118367910|118399202
8:67877252|67899217	15:84220498|84225453	15:118367910|118411610
2:136501203|136508938	15:84220501|84225453	15:120032208|120049357
2:11842769|11848750	15:84830996|84849136	15:120032208|120057011
12:12925005|12927778	15:84830996|84870609	15:120311931|120316950
7:65198472|65198799	15:86556414|86561911	15:120549038|120556942
11:17870879|17924109	15:87408913|87409377	15:120549038|120558909
3:54879341|54894632	15:88202356|88213250	15:120575328|120581076
13:75336799|75350029	15:88210866|88211674	15:124587035|124594858
9:66406846|66409132	15:88482354|88486742	15:126216519|126225081
1:203474706|203476159	15:91510898|91514202	15:128371748|128373809
16:22868833|22875446	15:91512801|91514202	15:130848034|130856845
1:143953852|143960599	15:91660148|91666425	15:130875217|130894869
10:40721055|40721258	15:91678147|91684121	15:131791193|131794795
6:135149943|135179646	15:93199516|93223292	15:131998300|132021440
1:163211217|163212239	15:93199516|93243693	15:132001973|132068151
3:83349428|83358984	15:93205480|93243693	15:132434354|132438263
9:66406846|66413572	15:93222405|93243693	15:133185673|133218757
13:32554728|32563493	15:93992834|94001331	15:133217294|133237622
5:82403730|82422198	15:94016853|94019208	15:133258867|133268029
14:30209090|30217153	15:94340048|94344535	15:133280528|133283709
1:100589850|100624993	15:94340048|94357985	15:133424468|133428580
13:72116572|72118925	15:94387078|94413980	15:133672399|133678247
1:253819153|253822106	15:94432750|94446961	15:133882802|133909848
1:131326820|131331148	15:94830414|94839646	15:133924880|133929332
8:38419255|38425519	15:94830414|94848113	15:135623969|135631135
5:51080501|51114899	15:95042537|95044148	15:135707739|135716699
8:68022433|68095973	15:95259699|95275846	15:135924097|135931508
1:110043814|110045873	15:95536052|95562038	15:137758108|137759351
1:253514454|253532500	15:96002500|96013455	15:137824300|137825447
12:53721218|53759463	15:100164717|100170857	15:137883502|137892318
1:130233523|130242062	15:100164717|100202655	15:137944669|137945054
8:82840984|82851898	15:100571652|100572459	15:139967130|139986145
13:111267694|111281930	15:100781403|100790156	15:139982578|139986145
13:132335769|132337788	15:101024492|101083385	16:18379579|18387297
9:6395535|6396485	15:101416838|101420373	16:18853042|18873158
13:134838956|134868441	15:101878521|101883548	16:19906267|19906628
[truncated: 236,925+ more rows]

## Sheet: Table S3
Table S3.The novel circRNAs compared with circAtlas database			Table S3.The novel circRNAs compared with circAtlas database
Both detected	Cleaned			find_cir	CIRI	Both_detected	Cleaned
1:188585728|188586393	12:20004495|20017961		In CircAtlas	134119	101579	78710	24703
12:21118219|21141475	5:6519442|6566862		New Found	104804	10040	3818	42
14:111253510|111282469	MT:9423|14557		Total Detected	238923	111619	82528	24745
14:111282328|111290117	14:22958352|22959645
16:24137283|24147171	10:53915823|53918587
16:52104314|52104868	8:69647221|69648017
2:82036248|82045476	15:615792|632268
4:15746247|15768069	1:121871577|121896972
6:62482952|62500604	16:79388838|79391379
7:11358130|11410675	9:92055394|92066929
7:115854140|115943277	9:92056167|92056478
9:135060744|135060941	1:84536323|84558464
X:111360339|111361088	6:33709723|33720646
12:52462657|52480210	9:53347881|53437896
13:124480637|124486210	1:14408861|14457143
14:107066305|107070302	9:126322500|126331708
14:111254200|111282469	8:130629561|130648577
15:113221721|113221867	12:61231989|61232637
2:760427|810393	8:65464351|65477030
3:2593284|2603722	4:78253828|78264328
4:63521811|63544581	8:9472425|9489105
7:103562502|103654257	X:42126085|42126502
8:101838541|101850511	12:7715649|7728046
Y:8944294|8954073	Y:8944294|8954073
1:242995184|243038113	Y:8955220|8958930
10:57250368|57271312	14:129071660|129077230
12:20004495|20017961	15:113038128|113038366
15:55523679|55571533	8:32554763|32573367
7:31734935|31772994	7:14126030|14206695
7:84554639|84561964	5:76899173|76942859
7:115586975|115604565	6:28783691|28787907
8:69679826|69688746	Y:9399938|9427746
1:112968880|113013582	8:18861488|18866145
12:38017448|38018464	18:5796222|5802893
13:134272162|134272823	15:8726124|8784351
14:132184346|132191598	1:92121747|92129229
16:63623807|63624575	14:27412920|27417310
2:113969511|114054246	9:108692997|108719815
6:98529602|98534032	1:128236882|128239847
7:13502798|13518496	7:15557725|15557917
13:203325937|203326442	10:68686079|68688441
17:33131570|33203826	10:19980836|19982712
2:785019|836701
2:10218849|10219467
6:18645803|18661608
9:84474344|84524677
1:55835924|55839973
12:20004951|20017961
14:9389175|9391224
17:51445102|51446339
3:96606498|96607665
4:41977910|41995496
7:37692015|37759202
6:164631579|164683280
7:45684443|45732635
8:37441277|37459145
12:6234709|6235577
5:7335646|7345954
1:184507071|184524334
1:269030324|269108256
10:65594619|65639948
13:29972945|29973947
13:182167978|182184581
2:11638957|11642329
7:783940|789468
7:77740362|77765018
1:84536323|84558464
10:10194716|10207599
2:108747794|108760749
6:13342045|13379605
8:80872584|80887562
11:67776846|67802680
12:11272285|11281526
18:48538009|48538181
3:10250154|10250520
6:91702695|91711327
7:31755195|31772994
1:254939773|254941676
15:113265788|113281378
18:6850050|6850331
2:6755695|6755860
2:16190634|16193802
2:64573714|64587381
4:344713|345121
8:69710370|69725345
8:74581125|74581394
9:124761971|124772710
1:149228411|149272247
10:43373891|43383914
11:25846115|25863874
13:83390668|83411814
13:89413561|89452176
13:110230615|110272226
15:20022186|20084083
16:41877941|41930144
17:28559370|28575782
3:117300558|117301647
6:167669421|167675557
7:11351222|11360342
7:84554639|84570821
1:224974089|224989657
12:40040143|40042078
15:66908058|66918365
18:11436848|11438257
1:217643588|217685361
13:136807762|136808379
13:138067177|138081475
14:135341782|135398930
15:59615747|59619478
3:107112758|107134461
8:264263|271359
8:30240050|30270166
2:61206103|61206332
3:17151139|17190209
8:1864168|1882271
8:74604236|74604427
12:59319172|59351696
14:22958352|22959645
14:54282008|54282303
2:6109357|6109704
2:15255512|15255785
3:99853589|99854025
5:6519442|6565568
5:6519442|6566862
9:9979597|10003175
9:9997870|10003175
9:17308774|17318263
MT:9423|14557
MT:13025|14694
MT:14367|14539
11:47743204|47746284
14:53697003|53697283
14:106916756|106964334
15:76284842|76286440
15:84431965|84432279
18:26057653|26062625
2:51346346|51446097
3:506147|506331
3:26357384|26366143
7:22889870|22938970
AEMK02000328.1:461740|462953
MT:8355|12701
MT:10201|14631
MT:10732|14557
MT:14355|14806
MT:14377|14631
MT:14465|14631
10:53915823|53918587
13:34592090|34592486
14:6366213|6369704
14:128687443|128688105
15:46604302|46659195
15:84374212|84408480
15:121434764|121434961
3:34940030|34940197
3:99933216|99933365
5:8989650|8990787
5:54178646|54179572
6:45181658|45182166
6:59367743|59369022
7:75658091|75685540
9:28298189|28300921
Y:39618858|39630855
1:33877828|33878016
12:14533441|14536797
13:145205866|145209332
14:54281758|54281917
15:25576582|25576770
15:84325966|84381825
15:84351996|84408517
15:84385382|84415993
15:84389156|84405406
2:6756368|6756533
2:65328447|65328779
3:49439814|49467335
6:59608247|59608635
8:1492738|1493734
8:13368009|13369922
MT:10122|10314
MT:11608|13903
1:180425329|180431593
10:11388861|11389055
14:55289051|55331216
14:123956897|123985489
3:16327874|16328040
3:110934987|110935140
MT:10201|14302
MT:11608|13075
X:106472315|106492025
1:25976966|25980795
1:25976966|25990340
1:113593470|113593651
13:25854000|25854194
13:34363461|34364663
14:53947556|54022922
6:20301313|20321216
6:47062616|47111707
7:26599398|26676844
Y:8955220|8958930
1:14408861|14457143
1:273250609|273259386
10:19362387|19375112
12:38083733|38117108
12:38083733|38120026
12:39492347|39494189
13:2933456|2938980
13:34340389|34347403
13:92039178|92084604
13:206225581|206226614
14:87977313|87978336
14:106581109|106666612
15:47091863|47099016
16:79934899|79937396
17:5546307|5557127
18:33833636|33867151
3:67710610|67710765
5:34720476|34720739
5:52140659|52167686
7:91555150|91564528
8:65601924|65658095
8:69647221|69648017
8:69647885|69652746
8:130568109|130577579
8:130617152|130648577
9:93241059|93242741
1:82260055|82260206
1:187537377|187595285
10:68537134|68537343
13:10992611|10995197
13:22570146|22592094
14:11320469|11331372
14:106228511|106306036
14:106294756|106332841
14:106298981|106306036
14:111024410|111028433
15:51458700|51465661
17:17554385|17637136
18:31365101|31385066
18:42590618|42595609
2:151065818|151067437
3:6630995|6660663
3:6645209|6660663
3:6652690|6696518
3:6687318|6744347
5:52164812|52171704
6:33709723|33720646
6:54135503|54136738
8:66204869|66296468
10:12774671|12821213
12:38083733|38114282
12:38083733|38122349
13:23212250|23213762
13:34905871|34906232
13:77614171|77640566
13:110821765|110822771
6:44119814|44129989
7:103347729|103371167
8:357394|357880
8:69647889|69652713
8:130629561|130648577
9:2038535|2092546
9:84775111|84812965
1:7093463|7094806
1:58191656|58217619
1:270050053|270072115
10:27588619|27588868
10:34165609|34169765
13:23175608|23192692
13:92102156|92106840
14:88181925|88182443
14:111200194|111207299
15:113299985|113321752
16:79899229|79912130
17:5117921|5137409
17:5563427|5566555
2:41090495|41093855
2:87831341|87840987
2:123350000|123361925
3:6736365|6746649
3:6742544|6758714
3:111323715|111359571
5:62363083|62365033
6:18661543|18671432
6:155437400|155447548
6:155473739|155513761
6:155496886|155508404
7:116470087|116475078
8:9356478|9361510
8:69647885|69649373
9:3289260|3290942
9:68090122|68105444
X:12031522|12035779
1:12382021|12392114
1:99098767|99102181
10:13751872|13760376
10:22738771|22748221
10:65570798|65639948
11:8630432|8640553
11:55520530|55604803
11:69070568|69105996
11:69099360|69160671
11:75862629|75862892
11:75862629|75926895
13:22525860|22573693
13:74939803|74941851
13:89414789|89417671
13:90092395|90104945
14:46230236|46233525
14:46622434|46623645
14:98950247|98958336
14:141701126|141701947
15:113265788|113277827
15:113299985|113327836
17:5052491|5128043
18:33317832|33329926
18:54226312|54266233
2:68387779|68403687
2:72464216|72466168
3:96626433|96641863
3:127910226|127912621
4:39793960|39810682
5:2657121|2692132
5:51888881|51900375
5:51905460|51912923
5:52153158|52174508
5:52159372|52166816
5:62361047|62377298
5:103882404|103890676
6:14984352|14984582
6:87615275|87651331
6:155496886|155513780
6:159224330|159263775
7:48821286|48821479
8:66655148|66658608
8:69644296|69658707
8:69645196|69660099
8:69658558|69658781
8:74581131|74581377
8:112444228|112446285
8:121096528|121096679
9:9447508|9448063
9:45836147|45837580
9:72966804|72968384
9:90991406|91008192
9:106690817|106700817
9:131384186|131385900
AEMK02000452.1:873373|874077
1:27712831|27713073
1:126865565|126865701
1:222575849|222582812
1:238712574|238775027
1:254692824|254695049
12:56761036|56826852
13:74952663|74952821
14:14590352|14595341
14:75754462|75763862
15:17106406|17139189
15:104193685|104206651
15:113281260|113311370
15:113299985|113324731
16:27538297|27538919
2:8695636|8741542
2:89326717|89370588
3:111324825|111354380
3:117311890|117313240
3:117311918|117312623
4:14942291|14942448
5:36287335|36309707
5:63469669|63508332
5:103092664|103096794
6:1097310|1126430
8:74557346|74557516
8:74581062|74581344
8:74581062|74581419
8:113366665|113375017
AEMK02000698.1:2545850|2546905
AEMK02000698.1:2546729|2562421
1:128368475|128416787
1:215669671|215694470
12:11753225|11753670
12:60427731|60433289
13:74945343|74948281
13:89447158|89452176
13:124438361|124438781
15:8726124|8784351
15:75429046|75456733
16:20577130|20596048
17:4966019|4969524
18:11416066|11416284
18:14287178|14302238
2:41084412|41097518
3:25301424|25306122
3:79091804|79186068
4:70968462|70973589
5:11216943|11221685
5:52159372|52169107
5:52167588|52169113
5:70406906|70436466
6:7028491|7037336
8:69658714|69660099
8:69733591|69754982
8:112450545|112465328
9:119813914|119814860
9:126463332|126472399
9:131384186|131427844
X:33977562|33981602
X:120105013|120106437
11:75797931|75897755
12:11789365|11808818
12:34885722|34885926
13:22318659|22387494
13:22318659|22397150
13:74939793|74948215
13:89420194|89441031
14:82126248|82126592
14:98965033|98972689
14:132605107|132605289
14:141697878|141701947
15:17122880|17139189
16:26030007|26040034
17:41406304|41416369
18:24563136|24635281
2:2576321|2604402
2:6751365|6754719
3:108043802|108047974
3:117314856|117315019
6:31792827|31835410
6:103720095|103720285
7:20515191|20517950
8:65885279|65892659
8:69656972|69660099
8:69735415|69735626
9:44216755|44217039
9:116189925|116190101
AEMK02000698.1:2592536|2598360
X:48297181|48319457
X:114249149|114249286
1:169789089|169789268
12:60430980|60433289
13:140054079|140072558
14:45214708|45217124
14:90356077|90416243
14:133881949|133954223
15:17034427|17036912
16:27320585|27336020
2:41084412|41090678
6:18660944|18671432
6:115893387|115897094
6:159270026|159284342
7:20607474|20608278
7:117616181|117619851
8:69649353|69658781
8:74578830|74580481
8:102410796|102416806
8:112450626|112451888
8:121102479|121103345
1:180030768|180051164
12:22005830|22011676
13:74941675|74945519
14:14590352|14591838
15:39665805|39684519
15:106532033|106574763
2:15817291|15818571
3:125411852|125438155
5:5705970|5708367
6:18656583|18666693
7:58697823|58698877
9:2092332|2107740
9:93178628|93192670
9:109472911|109483801
X:123910706|123922073
1:96743488|96763821
1:126363610|126371291
10:22742781|22815177
13:74886515|74906930
13:74939793|74965903
14:26051460|26089018
14:32659994|32660797
3:97093420|97096690
3:117277593|117286149
5:51905460|51911489
5:52138324|52165048
5:103846172|103878323
7:19301919|19308521
9:72064149|72068688
AEMK02000452.1:1186708|1195230
AEMK02000698.1:2549880|2550053
AEMK02000698.1:2597115|2598360
1:92121747|92129229
1:113795833|113796035
1:230604880|230605225
10:63892037|63912175
12:20012447|20020828
12:59283539|59323398
15:104212459|104219425
2:55807111|55832617
3:28584760|28602832
4:7834695|7835519
4:110431136|110475658
6:18084414|18089061
6:108263752|108307655
8:68346496|68349550
8:74598755|74604427
1:126660389|126678967
10:19351414|19375112
11:55420079|55471598
12:39590305|39594569
13:10766016|10778469
14:28122866|28138133
15:78226180|78233484
15:110022205|110030213
18:11417026|11436970
18:25809784|25884224
2:26510645|26510836
2:102535641|102547197
3:127901265|127913582
5:52097775|52108960
6:155507129|155508404
8:69647139|69648017
9:53344831|53437896
9:53347881|53437896
9:53347881|53439194
9:131464819|131475251
AEMK02000698.1:2518765|2526208
12:42616876|42621258
13:22525860|22623668
13:122190540|122192650
14:38117983|38123563
15:71166565|71193668
15:113221721|113262811
15:113221721|113281378
15:113315356|113327836
17:46800006|46811013
3:39819490|39821448
3:71670488|71685290
3:117281242|117281383
4:128086419|128087933
5:79431946|79437245
6:48721111|48723221
8:69651282|69660099
1:20832279|20846046
1:226163357|226163523
1:260997292|261003865
13:22480796|22515394
14:117137236|117170299
15:113265788|113268880
15:113311176|113315433
16:24537843|24544211
16:45104792|45156458
17:5052491|5131540
2:43490568|43491252
3:6696392|6729467
5:5999140|6033767
7:37692015|37772857
9:75875661|75918442
9:126322500|126331708
AEMK02000465.1:514051|593957
X:61588766|61597944
1:7081951|7085711
1:15758857|15766153
10:13757493|13771761
10:46656989|46694813
10:46680801|46694817
10:64688172|64722670
11:4142909|4156893
13:61334154|61338326
13:74888000|74944461
15:75287432|75288450
2:13324320|13324578
2:25707089|25709460
2:44756779|44773133
3:108003578|108021900
5:62358771|62368217
8:72522868|72532335
9:93203433|93204167
X:34373492|34382105
1:7075218|7085711
12:11350266|11438880
12:11400342|11425864
13:34939503|34939861
13:73870202|73876602
13:148517273|148517424
14:14585822|14591838
14:48451133|48473741
14:96623779|96683344
15:113255626|113303994
17:17026012|17061407
3:111650447|111665485
5:11260149|11268764
5:51878018|51889554
5:57831030|57854757
5:62449521|62464630
5:81257802|81279632
5:88160309|88162013
6:37627553|37629531
8:31211202|31263380
8:44720727|44721438
9:3289260|3290955
AEMK02000698.1:2518765|2518941
X:107067593|107070101
12:48743305|48743592
12:52804916|52805419
14:110981135|111000233
17:34812808|34815987
2:13324308|13336948
3:47792043|47809645
5:15082435|15082803
9:108692997|108719815
1:22670357|22719727
1:215644030|215692894
1:270096257|270133275
11:75748804|75752200
13:22361181|22362859
14:123928888|123929026
15:16262628|16292039
15:16277563|16292039
18:16550067|16605796
2:44450379|44451386
2:64298637|64298811
2:72437176|72437493
3:57852375|57854208
4:127294587|127332630
6:18079656|18085167
8:69643474|69658657
8:74599867|74600231
9:63894690|63894890
Y:8953984|8964391
13:109598119|109605199
15:133424468|133436095
16:21439156|21441861
3:6630995|6633855
4:81457118|81462370
4:124213747|124230278
5:21126101|21126288
7:4891679|4899784
8:69643500|69647347
X:47762801|47775285
Y:9399938|9410299
1:7067126|7094806
1:100611949|100613043
1:127207641|127237911
1:147590865|147617534
10:22975020|22977089
10:63640370|63644368
10:63654801|63656253
11:4734112|4734367
11:55501848|55599667
11:63697084|63699175
13:89440879|89449015
13:124515967|124516168
13:197153999|197158793
13:207986847|207994690
14:11347200|11348932
14:46630052|46633858
14:47381490|47381648
14:71445842|71448827
14:88004801|88004984
14:101248035|101248188
14:106192641|106196622
14:106305958|106320393
15:47083564|47099016
15:47085649|47086201
15:117725710|117727065
15:121260598|121260927
16:22622620|22653504
16:24544094|24550402
16:27539174|27539318
16:51285026|51285180
17:41406304|41412575
17:41417749|41420007
18:50019751|50020933
2:5097797|5097947
2:64723711|64723865
2:72432481|72433292
2:72436248|72436521
2:72456719|72456853
2:72465932|72467951
2:87799990|87828625
2:151432541|151433203
3:52193591|52193748
3:117307724|117307866
4:32828708|32830070
4:110378659|110378822
5:6541997|6542280
6:14985056|14985228
6:51374491|51374638
6:51374705|51375022
6:62937678|62937843
6:84248256|84248432
6:115878632|115906700
6:155473776|155475433
6:159346935|159347080
7:22939690|22957191
7:53469147|53469396
8:44715788|44717136
8:44715802|44717200
8:68338086|68340844
8:69647295|69658737
8:69651388|69652663
8:69658576|69658718
8:74561188|74561375
8:101522657|101525598
8:112470612|112470767
8:121238179|121243093
9:44179220|44179406
9:44202415|44202665
9:64036646|64036789
AEMK02000452.1:1174519|1208385
AEMK02000682.1:915821|916060
AEMK02000698.1:2563361|2563523
MT:9182|9332
1:7093549|7094750
1:106644553|106732919
1:261002547|261023140
1:270517683|270519605
10:12479241|12486455
12:51625930|51654962
13:22365782|22370627
13:74889288|74906930
13:89439811|89440988
13:150191346|150191646
13:207970398|207970806
14:40656418|40656556
14:105039359|105043404
14:105039393|105043404
14:106272916|106306036
14:106447193|106447664
14:115188310|115206539
14:117069261|117077746
14:117069261|117167359
14:141697989|141699103
15:117670525|117705027
16:20581429|20585414
16:24544094|24550396
16:26030007|26046607
16:47656892|47663324
17:37231572|37239047
17:39159248|39159497
2:12380936|12381100
2:72438209|72438365
2:85567547|85604438
3:25296624|25297955
3:117308603|117308741
3:126808896|126827567
5:6541997|6542316
5:62375530|62377298
5:103053250|103092852
6:14982332|14984342
6:14984828|14984980
6:49390913|49391136
6:51374519|51374671
6:51375011|51375166
6:77777868|77778010
6:155473776|155475421
6:168824025|168840726
8:69647274|69647977
8:69652532|69657110
8:69660044|69660801
8:74559569|74559733
8:96813252|96827948
8:120836081|120844514
8:121092465|121093448
9:44216755|44216994
9:44216863|44217006
MT:3095|7983
MT:9172|9319
X:46894168|46894497
X:108497462|108521969
1:58036976|58072084
1:121239836|121243250
1:243128625|243131102
10:46685908|46690694
11:67343496|67431103
12:12742934|12820743
12:12820586|12833323
12:24314179|24314328
12:39618370|39620812
13:32559854|32560016
13:34932282|34933345
13:123079978|123080951
14:108040828|108041013
14:111189596|111207299
14:114123694|114129024
14:129071660|129077230
15:133981615|133981768
17:38962699|38991291
18:14289864|14290022
18:30226990|30244646
2:72438207|72438368
2:76576010|76576148
2:84264252|84320617
3:6709392|6774278
3:86765934|86772513
3:110383702|110384647
3:111782449|111784483
5:23001406|23001561
5:51905460|51915115
5:62363083|62369015
6:27141450|27141615
6:155473776|155475481
7:42252170|42298559
8:68173213|68173370
8:69645196|69657110
8:69654097|69657099
8:74601547|74601774
8:120843172|120862458
9:106382358|106399679
AEMK02000698.1:2530389|2530568
MT:7153|14457
1:7351125|7351339
1:77268674|77275322
1:169779685|169783034
1:209296299|209302810
10:63639523|63640444
12:11272285|11279784
12:11350266|11439936
13:22655510|22655669
13:74963690|74965785
13:124434162|124435360
13:171992346|172006639
13:197147865|197148858
13:204859137|204861976
14:15018639|15018782
14:39303686|39305744
14:47407109|47407250
14:106611650|106611818
14:110951063|110975712
14:141697986|141699170
15:117670525|117676733
15:117674696|117676733
15:120851031|120851381
16:4387622|4392984
16:26046032|26050116
16:27543735|27544913
17:46793941|46811013
18:11447696|11447863
18:18536295|18567143
2:768864|819667
2:16132150|16132289
2:64847059|64847931
2:80367195|80368012
2:142412710|142413749
2:150381613|150392964
4:32827575|32833310
4:69617220|69617380
4:70965915|70966925
4:120395805|120395969
5:407514|407712
6:14983080|14984342
6:155473776|155475429
7:22918747|22957191
7:31859537|31859695
8:69654101|69660801
8:69657030|69658586
8:69733591|69752671
8:74598782|74599714
8:74604361|74607358
8:78446624|78480241
9:9627085|9627674
9:64036143|64036285
AEMK02000682.1:1276162|1279213
MT:3003|8046
MT:3115|3333
X:124294874|124295043
1:7073512|7102903
10:52590574|52591121
12:39493328|39522099
12:39618420|39620761
13:34345023|34345853
13:34892419|34893052
13:74941685|74941839
13:74944432|74945405
13:124435288|124436635
13:182222934|182223075
14:13378816|13384817
14:74738260|74739864
14:82112727|82113847
15:45867065|45867215
15:106641061|106643404
15:117690811|117690958
2:6752293|6752675
2:15817298|15818565
2:72438228|72438365
3:86630606|86632200
3:110308363|110359779
4:35774294|35774857
4:100350245|100367453
4:100371440|100371603
4:110869195|110874439
5:62373362|62383339
5:63670471|63670645
6:14983080|14984351
6:51373930|51374075
6:77374092|77374282
6:142481944|142482663
6:155473776|155475451
7:24070520|24071149
7:38334518|38334660
8:66814115|66825583
8:69647139|69651411
8:69647254|69647914
8:69735415|69740336
8:74580451|74581169
8:113366665|113373526
8:135456265|135466333
9:44212134|44213429
MT:3132|3333
1:261875937|261882117
12:55197346|55197788
12:55197346|55202821
13:84486126|84488573
15:113038128|113038366
16:48847946|48877768
16:66812203|66844232
3:24946181|24946559
3:58544737|58550364
6:28783691|28787907
15:84235755|84236609
4:18304751|18304971
6:7552153|7581835
8:32554763|32573367
X:20582593|20601957
X:58449568|58450493
1:90180046|90180272
12:7725966|7728046
13:92719413|92722773
15:655880|666466
15:84402853|84403667
6:148786681|148834382
9:109251785|109252662
13:28009011|28012599
15:615792|632268
15:73731602|73740810
15:83242560|83254480
15:84252891|84253468
15:84260136|84261512
15:84260485|84261324
15:84277749|84278254
15:84458285|84465644
15:84470304|84471569
3:111324825|111333983
7:29125812|29135799
7:96565360|96565521
12:55191570|55198285
14:2405058|2438229
14:10065645|10067836
15:46197748|46197931
15:84268293|84273093
15:84273270|84277981
6:51704423|51712356
7:23028258|23033367
8:18156568|18157985
X:12031522|12033626
1:247002971|247031070
1:247003003|247030669
12:55137855|55227878
15:132434354|132441329
2:9205070|9205342
3:6052784|6056587
5:76899173|76942859
5:77122920|77123093
X:28318372|28318527
10:13449299|13466400
6:149294329|149344379
AEMK02000452.1:1424458|1425462
1:16083692|16084575
1:236380020|236380197
10:51554679|51567174
15:601039|602772
15:84468042|84468284
15:93034383|93074570
5:29851336|29860533
1:39277116|39295080
1:44439245|44448530
12:36115214|36117528
15:84296944|84298815
15:84426397|84427172
15:84447741|84448005
15:92822066|92911116
18:19765574|19769058
8:39176740|39186924
9:125812503|125843531
1:163243595|163244763
10:12442075|12458895
11:17761434|17821584
12:18606802|18607152
12:55235179|55235379
15:686186|694573
15:84236897|84237610
15:84244729|84246879
15:84287641|84289980
15:84351566|84376963
2:51503264|51509628
3:15122667|15131159
4:6986164|6987881
4:118160423|118255391
4:118226316|118230068
7:29278217|29282254
12:39997371|40001550
13:46321082|46324213
13:46321082|46326969
14:35332235|35339556
14:50499887|50507073
4:94324418|94365083
6:44056584|44057257
7:14126030|14206695
7:29125812|29165288
7:88493349|88498007
AEMK02000561.1:5763|51042
MT:7298|7557
1:180034432|180051164
13:18173800|18174014
13:83737358|83740773
15:579678|582674
15:736701|765488
15:84250158|84252890
15:84372369|84374254
6:38032997|38033447
6:103528358|103562219
6:107004358|107004611
9:46478906|46504238
AEMK02000682.1:1299827|1300543
X:13281031|13287082
X:28669948|28670167
1:19996881|20011483
12:50181996|50209164
15:56869248|56885814
15:84257783|84258244
15:84266046|84275320
15:84272448|84275320
3:56985988|56995376
3:87257958|87258694
4:10408636|10447255
6:87850019|87863841
6:94787147|94787429
12:55143614|55195977
13:130646125|130662615
15:96006778|96029737
18:19453056|19453831
2:91778211|91784772
4:89320392|89322239
7:121773012|121782820
13:46309205|46309653
14:43489101|43520787
3:15120818|15131159
4:115079570|115123459
11:79095461|79101608
14:28257958|28258167
15:73739698|73739923
15:84274372|84276522
15:84413078|84416362
17:54605156|54608154
18:9084140|9084787
2:15363621|15365605
6:167360681|167361337
8:112691536|112695126
X:8358161|8377022
3:18548987|18555003
7:53654416|53657033
7:92709637|92759618
7:92713158|92717520
8:119583916|119589111
X:41327066|41329332
15:73729938|73730099
15:84231958|84234502
15:84233066|84233392
15:84272497|84273093
15:84487350|84487487
16:46917349|46965733
2:1383988|1384183
2:88450473|88452833
3:28827442|28828167
3:57868282|57868599
7:26664530|26676844
Y:8944294|8945069
1:12071470|12073120
10:23631562|23637783
13:23868505|23868682
13:26211040|26211199
13:72322377|72322574
14:75189538|75190159
14:87699008|87714147
15:633526|654800
15:763650|766047
15:84371786|84375415
5:82627007|82628489
13:23873253|23873480
14:28745594|28762987
15:73740103|73740909
2:9112007|9112242
4:71955591|71955788
4:71955591|71955858
6:51704102|51714795
7:30582062|30582279
8:130346965|130347521
X:28437952|28447817
15:84489248|84493797
5:18826700|18827021
1:31733457|31735999
1:121731741|121799598
1:121871577|121896972
1:273771031|273771296
10:15137816|15143716
10:68690561|68701379
11:49188143|49194800
12:1771007|1853441
12:3608485|3609006
12:15487195|15521324
12:19880164|19881950
12:35870501|35882905
12:57699980|57714831
13:204816136|204853275
14:76532465|76533805
15:77662492|77662700
15:131159702|131160963
15:138442182|138520327
16:71968197|71976479
16:79388838|79391379
18:55620344|55640504
2:24768838|24775982
3:4755564|4765113
3:43720976|43722600
3:44434020|44434525
3:102182613|102185358
4:1012073|1038370
5:82301835|82302417
6:167886908|167889990
7:52430652|52487978
8:961184|992003
9:92047369|92047521
9:92052138|92065564
9:92055394|92058003
9:92055394|92066929
9:92056167|92065564
X:43779018|43796694
1:515026|529594
1:121731741|121754883
12:5021970|5026833
12:52793953|52796810
13:18922994|18929894
13:74838251|74841072
13:173821241|173875306
14:8395980|8431172
15:101713326|101715410
15:102488482|102490510
15:109018912|109021363
17:51261398|51267246
18:30186084|30234110
18:30232755|30294197
2:603367|605169
3:8061642|8100519
3:9529512|9585872
3:40272621|40296136
3:112969064|112970166
4:83028286|83047293
5:33614944|33615102
5:61988359|61992129
5:80067286|80068882
5:82440168|82442167
6:58647278|58714646
6:105959779|105983850
7:114182358|114200106
8:71533513|71554645
8:88616473|88628609
9:82135552|82135701
9:92056167|92056478
9:92057905|92061421
1:120241787|120269138
1:121806162|121823356
1:126599954|126620115
1:184487697|184494332
1:216872056|216889538
1:267967550|267974212
10:43517654|43518085
10:44122846|44146987
10:44193279|44194580
12:59141997|59144508
12:59303043|59304131
12:60347249|60361193
13:71329294|71330540
14:72071711|72098615
15:25141919|25161087
15:109015540|109038243
17:28012054|28031062
17:49645658|49649580
17:50681674|50682492
17:51250881|51254497
18:9628076|9628238
18:30173542|30260224
18:30186092|30192349
2:6752322|6753783
2:15289073|15289402
2:61821160|61822412
2:131772367|131818449
2:151762592|151763140
3:42986001|42986481
3:45170960|45198293
4:2552198|2557535
4:41807157|41816719
4:130844410|130849428
4:130844410|130857206
5:56693180|56693565
6:4067723|4067979
6:55985327|55986679
6:57984453|57996878
6:87566198|87603238
7:56163980|56165302
7:68215406|68249957
8:346872|348501
8:1468715|1491356
8:55233638|55239626
8:130568109|130578871
9:82118876|82162636
9:92055394|92084569
9:105487033|105487292
9:114054425|114056816
X:124641549|124641717
1:18978280|18986861
1:42787706|42803137
11:77221192|77228077
11:78391140|78394519
12:18205404|18209860
13:86744490|86837271
13:110086433|110096881
14:141735213|141741298
15:54398190|54408354
16:3656544|3657378
16:79483173|79485757
18:30244544|30260224
2:25824845|25829365
2:40925543|40936710
2:151100223|151101408
3:40247310|40251856
3:44395076|44414790
3:131417619|131420474
4:976567|982034
4:74300436|74305319
6:109061486|109117460
7:22889305|22938383
7:41529071|41529992
7:76202623|76211100
7:78428348|78428827
8:71546123|71554645
8:71855180|71855349
8:83283671|83284574
9:33006343|33009728
9:109520475|109521117
1:76839944|76857724
1:121664106|121751517
1:121731741|121784285
11:5724984|5725166
13:27673147|27682538
13:78901462|78902045
13:200020688|200025693
14:73597884|73631979
14:101201041|101214889
14:101223173|101237620
18:9770500|9807047
2:621540|626784
2:72226217|72240303
2:150900183|150909252
3:23676610|23682346
4:98418966|98429133
4:98423253|98423402
5:9671357|9676745
6:49284269|49315037
6:80605570|80605760
6:95146049|95162921
6:167285889|167288143
7:33028219|33029459
8:130611008|130648577
9:46286668|46291947
9:67129160|67137996
9:123506610|123511256
X:124903028|124903180
1:7375884|7384261
1:25282323|25313736
1:77616793|77625944
1:121731741|121820841
1:235976294|235977603
1:268022702|268031046
10:17370180|17375830
13:131403112|131418045
13:133763875|133767946
13:198442497|198448140
15:138439023|138470035
16:3804693|3817636
17:32008551|32012859
17:62644398|62645120
18:30173542|30261094
18:30187149|30236246
18:30187149|30244646
2:72178473|72186220
2:72663758|72664116
2:88847729|88879456
2:134358352|134359155
3:1580507|1581842
3:3935802|3946031
3:4059362|4062165
3:5954657|5984284
3:19407560|19408226
3:43720976|43725805
3:44395076|44434193
4:109306023|109307413
4:119978085|119979926
5:2859075|2865965
5:5964134|5968539
5:12647829|12648623
5:82826267|82830814
5:93304524|93304961
6:50492131|50492986
6:63854887|63856786
6:83926127|83935102
6:85022559|85023628
6:145349399|145388523
7:23954590|23955160
7:100893828|100900171
8:590129|591720
8:964857|965479
8:986798|1002018
8:136577110|136590474
9:350075|354999
9:7844624|7849938
9:134975117|135010392
1:129172162|129172513
1:273776347|273787532
10:21548144|21598578
10:44210761|44210910
10:44264322|44290399
12:2169793|2204127
12:5041399|5047544
13:133763875|133764076
13:192682092|192685546
13:198415894|198448140
13:202476695|202478034
13:206884519|206895331
14:49476796|49477346
15:83209996|83250208
17:61955924|61957787
18:14109428|14112206
18:37163251|37166694
2:6750353|6752260
2:88876100|88900788
3:23676610|23676966
3:43722378|43727752
4:39934333|40005584
4:74366655|74367211
4:93122299|93126797
5:61992015|62018885
6:63863996|63893464
6:85013874|85023628
6:92556032|92556469
7:34397795|34400510
7:59447722|59448188
8:136570836|136590474
9:92052138|92055552
9:92055394|92099624
9:92055399|92056478
9:124107117|124133117
1:126624878|126626224
1:273776347|273785206
10:43517505|43521779
10:56079519|56089766
10:68671265|68684692
11:78200389|78208839
11:78730111|78736526
12:14272028|14279972
12:22053234|22057415
12:39436249|39452045
12:51783796|51789773
13:3455610|3467323
13:198415894|198416085
14:4306687|4314589
14:15014616|15014810
15:67994661|68000519
17:32003482|32007293
17:57013888|57014301
2:14561881|14567942
2:25805206|25829365
2:150902870|150909252
3:10360430|10360579
3:44582711|44595053
3:117911198|117925615
4:2552198|2564729
4:109309838|109319377
4:129506496|129568529
5:16534128|16594300
5:69548237|69550358
6:14739385|14740749
6:74664106|74665541
6:165849590|165852023
7:32357031|32357551
8:1500618|1508991
8:133862549|133877218
8:136560603|136571455
9:92147586|92159958
1:121799440|121844292
1:184490034|184494332
1:265977406|265991978
1:272180596|272191389
11:18904859|18919116
12:59824456|59839936
13:67738558|67743145
13:160137828|160148763
13:198415894|198448143
13:198461677|198468393
14:129027054|129041125
15:120436041|120440963
17:13946021|13946282
18:1550615|1551419
2:6793378|6794816
2:76661577|76663336
2:78685574|78696491
2:151057065|151063356
4:39967485|40011376
4:65613993|65658842
4:98427566|98428143
5:63303265|63330262
6:1442180|1466640
6:49643050|49644555
6:54231279|54231473
6:69979843|69984429
6:92102426|92111856
7:8740050|8740333
7:23604022|23605936
7:100472802|100479484
7:116370218|116371091
8:906615|908893
9:19689744|19785700
9:92043520|92061421
9:92047369|92058003
AEMK02000452.1:1208071|1210915
AEMK02000452.1:1665678|1668935
AEMK02000452.1:2184377|2193486
X:11438899|11461817
1:121731741|121831457
11:21186473|21190440
11:24794020|24830904
12:2121405|2127580
12:59862232|59875466
13:108874677|108880840
13:158611573|158616404
14:8436444|8437573
14:65501216|65589103
15:59205923|59206087
16:54174318|54204080
18:30219590|30236246
2:2134407|2154333
2:70764211|70764514
6:36387420|36388348
6:53149214|53155211
6:56406193|56420432
6:62482952|62497190
6:85022559|85026541
7:47896406|47913073
7:53101263|53108756
7:96347125|96360480
8:37465361|37517922
8:80787216|80817182
8:130650407|130660149
9:19677180|19770658
9:66651507|66653375
9:123457064|123511256
9:127501576|127522334
1:121831269|121872550
10:58029056|58051113
11:78377800|78379063
12:4444481|4451158
12:15478771|15487317
12:54236017|54239941
13:199899447|199912050
14:12913616|12914361
14:28791069|28792732
14:72195674|72198607
14:81863734|81865161
14:113151179|113151744
16:22267752|22268378
16:76205323|76218974
18:30222139|30294197
18:30244359|30294197
2:610291|618581
2:149697898|149706426
3:3610346|3611894
3:41449002|41469989
3:131318118|131322660
4:14294525|14294817
4:14518852|14531460
4:74365007|74367232
5:59874646|59935574
5:103092664|103107135
7:11579482|11580541
7:48085048|48096088
7:89749924|89752765
8:964857|986942
8:40171849|40198354
8:75417648|75420425
8:114101495|114109263
8:136565999|136571455
8:136568711|136588906
9:92045296|92047521
9:92052138|92056478
9:125048123|125048547
AEMK02000361.1:1966691|1970642
X:43804239|43807529
X:62202446|62209487
11:75595745|75600257
12:60819986|60835705
13:29901475|29959089
14:60362765|60373291
15:83803417|83808328
15:89290296|89299528
15:128746364|128750790
15:130977367|131014310
16:34386896|34446174
2:13547159|13566553
2:29874371|29898689
4:3070732|3131676
5:48540|49091
6:74891485|74894101
6:91778898|91781293
7:116404072|116412740
8:131290193|131316594
8:132046367|132074946
9:66579011|66580648
9:105010621|105011272
X:22052570|22114884
X:46354004|46358201
1:188585728|188591825
1:188586330|188591825
1:261357741|261366953
11:3227846|3228602
14:107177743|107181562
15:31626114|31636097
15:44762890|44764724
15:66676840|66690117
4:19655871|19670583
5:46756669|46773437
5:103754497|103851227
6:159876386|159879353
8:83664669|83678058
8:109457631|109458237
9:39208937|39211792
AEMK02000452.1:844660|852340
X:22113705|22172197
10:17937646|17959984
10:50353195|50353921
11:455011|460720
12:53002925|53006047
13:39870679|39873500
13:94162898|94238676
13:136492330|136496465
13:153498228|153511156
14:6727411|6754347
15:111389091|111391436
3:86621825|86623011
3:94182963|94205435
4:126769220|126769655
7:75155772|75157044
9:12322534|12360331
1:175430281|175433010
1:248125081|248157537
11:76859242|76859479
13:75504567|75504952
13:122101198|122102143
14:42499105|42526562
2:100448278|100456609
2:135200457|135200752
2:141497688|141498682
4:16070768|16076223
8:1718550|1729238
8:81211430|81212729
9:12729476|12729786
9:77936986|77989443
1:215776693|215789381
10:50722137|50739958
13:12544327|12549067
13:92551818|92555210
15:128543149|128562671
17:22023556|22033025
3:39290968|39291344
3:39742953|39748237
4:98134405|98157209
5:44420380|44460979
6:85898|90162
6:30076192|30083925
6:70864639|70871624
6:81574171|81574368
6:95035385|95114096
9:107721946|107745778
1:272746531|272757901
11:79018719|79019336
12:45868842|45887992
13:138983208|138992381
14:30159730|30191347
14:76327201|76337122
14:133488931|133496288
17:38138428|38139584
2:9747440|9747715
6:120510986|120586224
6:164718594|164737485
8:73807437|73853347
9:103218800|103228139
X:51968552|51968815
1:121774839|121872550
1:121806162|121807705
1:169420292|169439257
1:261054394|261089291
10:41251907|41343404
11:21187073|21190440
12:1503549|1509208
12:3594331|3599602
13:18922739|18923106
13:128019114|128020130
14:15021584|15023489
14:108064956|108074283
14:110865382|110865706
15:138602767|138614428
17:31552616|31557716
17:35726811|35740590
17:58639040|58641188
3:28430372|28433549
4:89385277|89387728
5:39585247|39592889
5:47813130|47818141
5:78216895|78217264
7:49625094|49626036
7:78427416|78431487
7:98450407|98450658
8:70055141|70146316
9:19689744|19752254
9:19689744|19763439
9:39689378|39690397
9:39693016|39702225
X:33670628|33673345
X:33738734|33739583
Y:9430607|9432236
1:270050053|270052172
1:273771031|273787532
10:68498454|68499828
11:21187073|21194845
13:77228188|77235024
13:133763875|133767516
13:146139766|146141615
14:74648665|74658303
17:39143283|39234981
17:51280113|51288140
18:6090770|6108599
2:6801381|6802590
3:536056|542897
3:17197540|17199762
5:2854853|2860069
7:49725449|49745738
7:78427330|78431487
9:108287202|108297209
X:88172643|88174067
X:120378429|120397985
1:74586282|74589786
1:121844177|121872550
10:64783828|64786623
11:67467093|67471096
12:49005456|49009479
13:198442497|198448143
15:79337076|79364247
15:104862142|104877252
18:30260042|30261094
18:33772325|33783592
18:50429194|50429750
2:4088822|4094059
2:103338898|103347906
2:103403019|103408776
3:3944074|3948698
3:43727631|43730614
3:52513101|52517793
3:108003578|108008242
5:59503421|59504763
5:76238515|76242213
5:85179173|85179727
6:34157057|34158872
6:69949133|69949312
6:74556158|74556394
7:91375955|91382847
9:33037357|33045820
10:44122846|44123247
11:21216247|21217594
11:78383841|78385988
12:51783796|51784837
14:20052060|20055428
14:73057795|73077606
15:110695501|110697581
2:151096438|151101408
3:8049944|8091253
3:39524463|39532322
3:85931741|85966262
4:39967781|40018424
5:27441846|27442190
7:84749280|84787705
9:12671435|12674927
9:19689744|19770658
X:33657576|33667153
X:59570402|59571888
1:121799440|121806250
12:417973|422053
12:5643798|5644560
12:46583815|46589383
12:46892707|46893198
13:51386726|51398624
13:115470096|115471266
14:76281703|76285566
15:126445750|126460287
2:71507837|71509926
2:151012135|151022109
4:7082206|7152497
4:39796157|39810682
4:130849171|130855008
5:61838094|61840239
5:63326673|63331236
6:77580741|77581463
7:48821286|48887363
7:55292176|55296696
7:65030900|65049166
7:68176044|68182942
8:80960742|80961088
9:55976991|56007700
9:107698470|107708369
9:135033375|135051995
X:97170437|97180141
X:125578484|125579799
1:54469425|54511387
1:268173120|268178058
10:15143492|15159549
11:77478443|77484890
12:3611657|3618789
12:15120627|15120903
12:59124573|59126171
13:32728371|32728843
13:73615406|73631399
14:28747327|28748290
14:72195569|72210618
14:108064956|108099200
14:137238850|137258655
18:46066213|46067058
2:77342608|77342797
2:78964871|78967471
3:17834336|17845042
3:37950916|37957314
3:43717501|43722600
3:44378918|44414790
3:70367273|70370830
3:80283166|80288540
3:86038263|86044744
4:15656443|15656846
4:37471924|37491792
5:19683684|19686760
5:63323017|63325007
5:103169192|103177165
6:103757972|103758513
8:77270414|77271140
Y:9157226|9157973
1:223608485|223647693
12:1508510|1508812
13:26503768|26593210
13:34076870|34077871
13:34840730|34841345
14:8461259|8461678
14:32661989|32662166
14:91520779|91555823
14:111475933|111476449
15:59396221|59396588
15:131331404|131331613
16:71981104|71981267
18:5290963|5291153
2:12507080|12508067
2:27177237|27177440
2:84607838|84649220
3:91726741|91726962
4:41230504|41230672
5:12505758|12506022
5:45758153|45758317
5:64089857|64090029
6:43884314|43884581
6:49312475|49312709
8:96949748|96949944
9:13089460|13094247
9:49691223|49692106
9:98193359|98218669
X:100827855|100828121
13:135335541|135337929
7:113222000|113238101
AEMK02000452.1:2080812|2087500
1:184524174|184528234
11:18141808|18142200
13:90760564|90760921
15:71166565|71166721
16:18611286|18614155
18:31421566|31421729
5:52080519|52113590
6:49605319|49605944
8:131746446|131747710
10:22643502|22649477
10:25568295|25568454
13:195579179|195651585
14:50392539|50400367
18:13330404|13330752
4:68069625|68070578
6:27684919|27690258
7:91544914|91564528
7:100692761|100707822
X:42106028|42106231
X:97345445|97345640
X:124485558|124486066
1:115283259|115325807
10:20011517|20017425
11:1315410|1317882
15:99912851|99932771
15:99915258|99940577
16:28198966|28199784
17:5644675|5644896
17:25130554|25189185
18:11639267|11640611
2:47090866|47107175
2:101324376|101336867
X:15742549|15815716
1:129875151|129876457
1:236423047|236432123
10:22581349|22649477
14:30396305|30426341
2:87084000|87084289
4:38937611|38938185
5:87999991|88046593
9:40083609|40109060
1:55876382|55882902
1:256716095|256729656
15:23685664|23697677
4:18363417|18444305
6:14654940|14666490
8:16583556|16607983
8:80582727|80638316
9:129001834|129002963
MT:3038|11212
X:20552281|20588229
1:119864293|119864567
1:206290204|206309172
14:12223839|12245818
3:17628487|17628914
4:126688468|126700132
9:93107414|93132984
MT:3033|3408
1:130251837|130255918
1:161325305|161325823
10:56088330|56089766
12:23613098|23625967
13:131395004|131421084
13:147466889|147478520
15:110727073|110728200
2:38889324|38952768
3:125112398|125147921
3:125459542|125465846
4:94167060|94188897
9:72172032|72179849
12:15478771|15521324
13:16822443|16853401
4:79710433|79764862
5:71560493|71584762
1:168987633|169006710
1:251457253|251469185
11:62686315|62721766
13:30775486|30775661
14:111659123|111659396
3:4061947|4074330
5:83252820|83271793
8:131697086|131703997
1:90873272|90874855
1:120541684|120602877
12:31634176|31639615
15:52747053|52774112
17:26093111|26097940
2:14903800|14905737
3:24341965|24366176
5:73373101|73380665
6:38435812|38463624
1:9492460|9495723
1:159378964|159390684
1:265691681|265692127
11:67183546|67184655
12:25134817|25135063
12:32060088|32154317
12:61111481|61185774
13:60315509|60324597
13:94319174|94330221
13:140134094|140135016
13:200745761|200759988
14:61883226|61889315
16:63120769|63127883
18:14178768|14242543
2:101580274|101587534
3:96726670|96746005
3:125139219|125141259
5:27184128|27195997
5:62189291|62190482
5:70176808|70177547
5:83252820|83291741
6:44190434|44265683
7:60069826|60070540
7:72548334|72569787
9:135330140|135345636
X:41095340|41116966
13:110798748|110810318
15:83209996|83242672
2:6751137|6751385
2:6752810|6754392
2:46576744|46669513
5:9889814|9895145
7:12218206|12266794
1:99775187|99775353
1:216382596|216388558
10:33902730|33920155
11:6978875|6979107
11:65315580|65337188
13:35584342|35584826
14:1967524|1968799
2:125591169|125640137
3:76691423|76693036
4:111230122|111251135
6:20305399|20324431
X:64281982|64308066
X:110622500|110694417
1:25589995|25591079
10:46922893|46924786
11:65359974|65391324
17:37916391|37916908
3:67374470|67374871
7:41593695|41599386
7:53238130|53253969
1:55553478|55554875
10:19133892|19135338
10:63459935|63461757
12:15065661|15066462
12:15065661|15066492
12:61231989|61232637
13:200764595|200774105
13:203325937|203332967
14:42313019|42314121
15:16704718|16726670
15:72040752|72082577
15:92057731|92058021
16:73967887|73974822
17:14759374|14759710
17:40629247|40629445
5:30302495|30303086
5:50614365|50618105
7:49304645|49312211
7:83194985|83219491
7:121747710|121773698
7:121782613|121791036
8:65464351|65477030
9:75215578|75290025
AEMK02000682.1:107975|113040
X:87037426|87053614
1:66351203|66372342
1:161791680|161832653
1:161791709|161832653
1:161832551|161839209
11:69962637|70001752
11:70328288|70378964
12:14003503|14010166
12:27322933|27323676
12:35144662|35144842
12:36153066|36153861
13:6242781|6284690
18:8474860|8485245
6:100902050|100958594
7:4677199|4683199
7:38924759|38925811
9:96246259|96308959
9:124171128|124173652
1:219182752|219186921
11:75298957|75299109
12:15065288|15066087
12:19329745|19330028
13:44077514|44104397
14:65171300|65171668
15:121332275|121334365
2:111217997|111249385
3:41455953|41458863
3:86391854|86411051
4:64194316|64277903
4:78253828|78264328
5:28770734|28791412
6:154850033|154850248
6:161206543|161208857
7:121777786|121791036
8:65464351|65471260
X:34014202|34028694
X:57408492|57408749
1:161791680|161803081
1:161791680|161839209
1:161791709|161803081
1:161792656|161822347
[truncated: 1,820 more rows]

## Sheet: Table S4
Table S4.Tissue-specific and housekeeping circRNAs
CircRNA_ID	Type	Tissue	location	Parent Gene
8:68022433|68118948	Tissue-Specific	Gallbladder	exon	SLC4A4
12:20004495|20017961	Tissue-Specific	Gallbladder	exon	SLC4A4
8:68088833|68107642	Tissue-Specific	Gallbladder	exon	GPC3
8:68088833|68118948	Tissue-Specific	Gallbladder	exon	SLC5A1
13:134233747|134234461	Tissue-Specific	Gallbladder	exon	SLC4A4
X:109674560|109745549	Tissue-Specific	Gallbladder	intergenic_region	nan
X:109649122|109745549	Tissue-Specific	Gallbladder	exon	nan
14:48676292|48678419	Tissue-Specific	Gallbladder	exon	GPC3
15:84366974|84408517	Tissue-Specific	Heart	exon	nan
15:84354981|84408517	Tissue-Specific	Heart	exon	KIF26B
15:84374212|84408517	Tissue-Specific	Heart	exon	GLI3
15:84381742|84408517	Tissue-Specific	Heart	exon	UBR4
15:84370873|84408517	Tissue-Specific	Heart	exon	KIAA1217
15:84365150|84408517	Tissue-Specific	Heart	exon	ARHGEF28
15:84370578|84408517	Tissue-Specific	Heart	exon	DCAF6
7:26620967|26676922	Tissue-Specific	Heart	exon	NUP214
15:84388627|84408517	Tissue-Specific	Heart	exon	PPFIBP2
15:84385382|84408517	Tissue-Specific	Heart	exon	FILIP1
15:84387944|84408517	Tissue-Specific	Heart	exon	GLI3
15:84411871|84413356	Tissue-Specific	Heart	exon	COG3
15:84354981|84413356	Tissue-Specific	Heart	intron	MACF1
2:83021038|83043044	Tissue-Specific	Heart	exon	CTNNA3
X:111382631|111414313	Tissue-Specific	Heart	exon	ADAMTS6
15:84374212|84413356	Tissue-Specific	Heart	intron	nan
10:53900955|53905978	Tissue-Specific	Heart	exon	MAP3K5
15:84388183|84408517	Tissue-Specific	Heart	intergenic_region	nan
15:84325966|84342397	Tissue-Specific	Heart	exon	POPDC3
9:99112689|99114665	Tissue-Specific	Heart	exon	ALPK2
15:84411871|84420120	Tissue-Specific	Heart	exon	ENAH
15:84354981|84410082	Tissue-Specific	Heart	exon	NEBL
15:84371198|84408517	Tissue-Specific	Heart	exon	NEBL
15:84380062|84408517	Tissue-Specific	Heart	exon	NEBL
15:84374212|84410082	Tissue-Specific	Heart	exon	NEBL
15:84365150|84420120	Tissue-Specific	Heart	exon	NEBL
15:84381742|84413356	Tissue-Specific	Heart	exon	ZMYM2
15:84387271|84408517	Tissue-Specific	Heart	exon	nan
15:84376540|84408517	Tissue-Specific	Heart	exon	MYOCD
15:84378055|84408517	Tissue-Specific	Heart	exon	GOLGA4
14:53825928|53838038	Tissue-Specific	Heart	exon	APP
4:125831440|125834477	Tissue-Specific	Heart	exon	SYNJ1
10:53915823|53918587	Tissue-Specific	Heart	exon	MYL2
10:53921259|53926881	Tissue-Specific	Heart	exon	RYR2
15:84374212|84420120	Tissue-Specific	Heart	exon	RYR2
6:95185711|95196855	Tissue-Specific	Heart	exon	RYR2
15:84354981|84420120	Tissue-Specific	Heart	exon	RYR2
15:84381742|84420120	Tissue-Specific	Heart	exon	RYR2
15:84370873|84375798	Tissue-Specific	Heart	exon	RYR2
14:53947556|53969659	Tissue-Specific	Heart	intron	RYR2
15:84365150|84413356	Tissue-Specific	Heart	exon	SORBS1
15:84354981|84410512	Tissue-Specific	Heart	exon	SORBS1
15:84370578|84375798	Tissue-Specific	Heart	exon	ABLIM1
7:26644983|26676922	Tissue-Specific	Heart	exon	ABLIM1
15:84366974|84413356	Tissue-Specific	Heart	exon	EIF3A
8:125092162|125104825	Tissue-Specific	Heart	intron	nan
15:84354981|84413903	Tissue-Specific	Heart	intron	SORBS2
6:120436551|120482663	Tissue-Specific	Heart	intergenic_region	nan
2:103350235|103362696	Tissue-Specific	Heart	intergenic_region	nan
15:84381742|84410082	Tissue-Specific	Heart	intergenic_region	nan
18:52599764|52609441	Tissue-Specific	Heart	intergenic_region	nan
15:84354981|84381825	Tissue-Specific	Heart	intergenic_region	nan
8:125067992|125104825	Tissue-Specific	Heart	intergenic_region	nan
2:39293801|39302396	Tissue-Specific	Heart	intergenic_region	nan
2:6756415|6756573	Tissue-Specific	Heart	intergenic_region	nan
6:37882754|37897095	Tissue-Specific	Heart	intergenic_region	nan
10:53922350|53926881	Tissue-Specific	Heart	intergenic_region	nan
15:84354981|84375798	Tissue-Specific	Heart	intergenic_region	nan
9:1993446|2023163	Tissue-Specific	Heart	intergenic_region	nan
14:106974118|106988787	Tissue-Specific	Heart	intergenic_region	nan
15:84374212|84410512	Tissue-Specific	Heart	intergenic_region	nan
2:82924571|83019778	Tissue-Specific	Heart	intergenic_region	nan
1:71382432|71384471	Tissue-Specific	Heart	intergenic_region	nan
15:84386955|84408517	Tissue-Specific	Heart	intergenic_region	nan
15:84375200|84408517	Tissue-Specific	Heart	intergenic_region	nan
10:53885793|53888015	Tissue-Specific	Heart	intergenic_region	nan
15:84385382|84420120	Tissue-Specific	Heart	intergenic_region	nan
7:26599398|26676922	Tissue-Specific	Heart	intergenic_region	nan
6:37882754|37887783	Tissue-Specific	Heart	intergenic_region	nan
18:26048133|26094774	Tissue-Specific	Heart	intergenic_region	nan
8:125057227|125092346	Tissue-Specific	Heart	intergenic_region	nan
6:138813925|138829038	Tissue-Specific	Heart	intergenic_region	nan
15:84381742|84410512	Tissue-Specific	Heart	intergenic_region	nan
12:56971607|57009314	Tissue-Specific	Heart	intergenic_region	nan
15:84370873|84413356	Tissue-Specific	Heart	intergenic_region	nan
15:84365150|84410082	Tissue-Specific	Heart	intergenic_region	nan
MT:14377|14557	Tissue-Specific	Heart	intergenic_region	nan
15:84325168|84342397	Tissue-Specific	Heart	intergenic_region	nan
7:26599398|26633973	Tissue-Specific	Heart	intergenic_region	nan
11:682797|699559	Tissue-Specific	Heart	intergenic_region	nan
14:124776188|124781307	Tissue-Specific	Heart	intergenic_region	nan
15:84350908|84408517	Tissue-Specific	Heart	intergenic_region	nan
14:54348256|54348608	Tissue-Specific	Heart	intergenic_region	nan
14:32205961|32206297	Tissue-Specific	Heart	intergenic_region	nan
X:111378034|111414313	Tissue-Specific	Heart	intergenic_region	nan
7:121152511|121152673	Tissue-Specific	Heart	intergenic_region	nan
3:86596187|86597389	Tissue-Specific	Heart	intergenic_region	nan
13:162401440|162409814	Tissue-Specific	Heart	intergenic_region	nan
10:17903453|17903989	Tissue-Specific	Heart	intergenic_region	nan
12:56998732|57009314	Tissue-Specific	Heart	intergenic_region	nan
15:84329522|84342397	Tissue-Specific	Heart	intergenic_region	nan
7:26664530|26676922	Tissue-Specific	Heart	intergenic_region	nan
10:53898367|53905978	Tissue-Specific	Heart	intergenic_region	nan
1:90611779|90619054	Tissue-Specific	Heart	intergenic_region	nan
6:120440185|120482663	Tissue-Specific	Heart	intergenic_region	nan
13:22163023|22202789	Tissue-Specific	Heart	intergenic_region	nan
15:84370873|84410082	Tissue-Specific	Heart	intergenic_region	nan
13:189523366|189541330	Tissue-Specific	Heart	intergenic_region	nan
1:162223123|162224854	Tissue-Specific	Heart	intergenic_region	nan
5:41492479|41493703	Tissue-Specific	Heart	intergenic_region	nan
15:46604302|46646578	Tissue-Specific	Heart	intergenic_region	nan
3:35008565|35070439	Tissue-Specific	Heart	intergenic_region	nan
10:53868980|53909429	Tissue-Specific	Heart	intergenic_region	nan
13:22204425|22219312	Tissue-Specific	Heart	intergenic_region	nan
15:84370873|84381825	Tissue-Specific	Heart	exon	nan
15:84350342|84408517	Tissue-Specific	Heart	intergenic_region	nan
15:84430725|84479562	Tissue-Specific	Heart	exon	TRIP12
6:112408292|112462754	Tissue-Specific	Heart	intron	TENM2
6:28711467|28783794	Tissue-Specific	Heart	intergenic_region	nan
15:84370578|84413356	Tissue-Specific	Heart	exon	TSPAN12
15:84370578|84410082	Tissue-Specific	Heart	exon	nan
8:37564479|37600519	Tissue-Specific	Heart	exon	NAV2
15:84374212|84413903	Tissue-Specific	Heart	exon	IRAG1
MT:9423|14557	Tissue-Specific	Heart	exon	OBSCN
7:110390666|110392110	Tissue-Specific	Heart	exon	ARHGEF28
15:84339691|84408517	Tissue-Specific	Heart	exon	ARHGEF28
14:54018521|54021717	Tissue-Specific	Heart	exon	ARHGEF28
10:50709414|50757421	Tissue-Specific	Heart	exon	RBFOX1
15:84385382|84413356	Tissue-Specific	Heart	exon	SPTBN1
14:124792593|124798082	Tissue-Specific	Heart	exon	BCL9
15:84354981|84411308	Tissue-Specific	Heart	exon	ZNF644
11:21855168|21864250	Tissue-Specific	Heart	exon	PKP2
5:52470858|52473275	Tissue-Specific	Heart	exon	PDE3A
15:84381742|84413903	Tissue-Specific	Heart	exon	NFATC3
4:82951030|82976560	Tissue-Specific	Heart	exon	MYLK3
15:84389156|84408517	Tissue-Specific	Heart	exon	MYLK3
13:196247631|196273952	Tissue-Specific	Heart	intron	MACF1
2:51346346|51363384	Tissue-Specific	Heart	exon	EPB41L3
16:43766357|43775335	Tissue-Specific	Heart	exon	CDH2
6:101656034|101666446	Tissue-Specific	Heart	exon	FHOD3
8:37584755|37605348	Tissue-Specific	Heart	exon	FHOD3
8:37584755|37600519	Tissue-Specific	Heart	exon	FHOD3
14:128973895|128981137	Tissue-Specific	Heart	exon	nan
15:84267054|84267212	Tissue-Specific	Heart	exon	SCMH1
1:8814015|8825081	Tissue-Specific	Heart	exon	MLIP
16:56534460|56538844	Tissue-Specific	Heart	exon	MLIP
14:54018521|54029981	Tissue-Specific	Heart	exon	MLIP
4:118382613|118385897	Tissue-Specific	Heart	exon	MLIP
16:28181483|28207944	Tissue-Specific	Heart	exon	MLIP
AEMK02000452.1:2251156|2295643	Tissue-Specific	Heart	exon	nan
14:53684820|53730132	Tissue-Specific	Heart	exon	PTPN21
15:84387944|84420120	Tissue-Specific	Heart	intergenic_region	nan
5:68117339|68119047	Tissue-Specific	Heart	exon	CORIN
13:108834946|108854260	Tissue-Specific	Heart	exon	CORIN
6:170161273|170173172	Tissue-Specific	Heart	exon	CORIN
5:52464458|52544004	Tissue-Specific	Heart	exon	CORIN
14:106916756|106946198	Tissue-Specific	Heart	exon	PDLIM5
14:53947556|53974338	Tissue-Specific	Heart	exon	PDLIM5
2:82898399|82901526	Tissue-Specific	Heart	exon	PDLIM5
2:83042866|83071023	Tissue-Specific	Heart	intergenic_region	nan
15:84387944|84410082	Tissue-Specific	Heart	exon	PPP1R13B
18:2595054|2602700	Tissue-Specific	Heart	intergenic_region	nan
14:53850721|53862906	Tissue-Specific	Heart	intergenic_region	nan
6:58145992|58174937	Tissue-Specific	Heart	intergenic_region	nan
15:84385382|84410512	Tissue-Specific	Heart	exon	nan
10:13471568|13527498	Tissue-Specific	Heart	exon	GCNT3
15:84365150|84410512	Tissue-Specific	Heart	exon	TXNDC16
14:53847434|53862906	Tissue-Specific	Heart	exon	NEBL
16:43766357|43832197	Tissue-Specific	Heart	exon	COG3
14:70838006|70861176	Tissue-Specific	Heart	exon	VWA8
8:37599357|37600519	Tissue-Specific	Heart	exon	MYOCD
12:56896838|56902547	Tissue-Specific	Heart	exon	GOLGA4
15:84366974|84410512	Tissue-Specific	Heart	exon	ITGA9
15:84408236|84408517	Tissue-Specific	Heart	exon	PHC3
7:26675369|26693154	Tissue-Specific	Heart	exon	GRAMD1C
7:85996423|86056387	Tissue-Specific	Heart	exon	CRYBG3
15:84366294|84408517	Tissue-Specific	Heart	intergenic_region	nan
5:52437073|52464582	Tissue-Specific	Heart	exon	FBRSL1
2:48891637|48917915	Tissue-Specific	Heart	exon	RYR2
11:21855168|21865590	Tissue-Specific	Heart	intergenic_region	nan
13:22180260|22202789	Tissue-Specific	Heart	intergenic_region	nan
7:26689737|26719989	Tissue-Specific	Heart	intergenic_region	nan
15:84381742|84410929	Tissue-Specific	Heart	intergenic_region	nan
15:84373631|84408517	Tissue-Specific	Heart	intergenic_region	nan
5:52423250|52452918	Tissue-Specific	Heart	intergenic_region	nan
6:77683512|77683699	Tissue-Specific	Heart	intergenic_region	nan
13:146010165|146031755	Tissue-Specific	Heart	intergenic_region	nan
14:22958352|22959645	Tissue-Specific	Heart	intergenic_region	nan
11:25273271|25281252	Tissue-Specific	Heart	intergenic_region	nan
15:130875217|130876977	Tissue-Specific	Heart	intergenic_region	nan
15:84387944|84413356	Tissue-Specific	Heart	exon	OXCT1
10:53898367|53901065	Tissue-Specific	Heart	exon	NNT
14:53930629|53977601	Tissue-Specific	Heart	exon	ADAMTS6
4:2880193|2891317	Tissue-Specific	Heart	intergenic_region	nan
15:33545050|33545579	Tissue-Specific	Heart	exon	TSPAN12
15:84365150|84413903	Tissue-Specific	Heart	exon	CAST
7:26644983|26676844	Tissue-Specific	Heart	exon	PTK2
18:14918285|14926942	Tissue-Specific	Heart	exon	CHD7
1:271177714|271182296	Tissue-Specific	Heart	exon	PALMD
5:41438437|41447707	Tissue-Specific	Heart	exon	PKP2
3:101468107|101490684	Tissue-Specific	Heart	exon	PDE3A
6:120440185|120528034	Tissue-Specific	Heart	exon	PDE3A
1:182118905|182140469	Tissue-Specific	Heart	exon	WNK1
8:66097847|66099202	Tissue-Specific	Heart	exon	MLIP
6:95185711|95192032	Tissue-Specific	Heart	exon	YY1
4:72657070|72694320	Tissue-Specific	Heart	exon	YTHDC1
8:109319941|109378747	Tissue-Specific	Heart	exon	nan
AEMK02000698.1:768735|785911	Tissue-Specific	Heart	exon	ND5
15:84370873|84420120	Tissue-Specific	Heart	exon	NEBL
1:37250879|37265976	Tissue-Specific	Heart	exon	NEBL
18:26086210|26094774	Tissue-Specific	Heart	exon	RYR2
5:52437073|52452918	Tissue-Specific	Heart	exon	nan
13:117749440|117785797	Tissue-Specific	Heart	exon	DHX57
8:13368009|13369375	Tissue-Specific	Heart	exon	PDE3A
15:84411871|84413903	Tissue-Specific	Heart	intergenic_region	nan
AEMK02000698.1:740950|785911	Tissue-Specific	Heart	intron	MLIP
4:99983644|99986560	Tissue-Specific	Heart	exon	USP13
14:12913616|12943614	Tissue-Specific	Heart	exon	RYR2
14:53710940|53730132	Tissue-Specific	Heart	exon	RYR2
18:52569239|52609441	Tissue-Specific	Heart	intergenic_region	nan
15:84366974|84411308	Tissue-Specific	Heart	exon	nan
1:27574604|27589982	Tissue-Specific	Heart	intergenic_region	nan
1:112536005|112536729	Tissue-Specific	Heart	exon	PDE3A
16:26522986|26589063	Tissue-Specific	Heart	exon	MLIP
AEMK02000698.1:2508121|2564951	Tissue-Specific	Liver	intergenic_region	nan
14:106581109|106594352	Tissue-Specific	Liver	exon	PCSK6
8:69658558|69660801	Tissue-Specific	Liver	exon	CPB2
3:6641324|6645357	Tissue-Specific	Liver	exon	ARSG
1:261002547|261006200	Tissue-Specific	Liver	exon	KNG1
14:106294756|106306036	Tissue-Specific	Liver	exon	KNG1
4:32828631|32833310	Tissue-Specific	Liver	intron	NECTIN3
6:155496886|155513761	Tissue-Specific	Liver	exon	P4HA1
3:6763925|6770048	Tissue-Specific	Liver	exon	FN1
8:69649353|69657110	Tissue-Specific	Liver	exon	NADK2
1:261061492|261067829	Tissue-Specific	Liver	exon	OCLN
7:20602716|20643868	Tissue-Specific	Liver	exon	FGL1
8:69649353|69654201	Tissue-Specific	Liver	exon	CAT
13:124521558|124534067	Tissue-Specific	Liver	exon	BHMT
5:52153158|52169113	Tissue-Specific	Liver	exon	HSD17B4
5:87553022|87555197	Tissue-Specific	Liver	intron	MYLPF
8:69649353|69655936	Tissue-Specific	Liver	exon	DPYS
2:87821310|87859394	Tissue-Specific	Liver	exon	F5
8:69647221|69648017	Tissue-Specific	Liver	exon	PIK3C2G
7:20515191|20521646	Tissue-Specific	Liver	exon	PIK3C2G
3:6636851|6645357	Tissue-Specific	Liver	exon	CDH1
7:20607474|20614931	Tissue-Specific	Liver	exon	AGMAT
11:21263906|21281234	Tissue-Specific	Liver	exon	RNF125
2:87915972|87925512	Tissue-Specific	Liver	exon	NPNT
2:26496798|26519328	Tissue-Specific	Liver	exon	SEC16B
8:69715909|69727203	Tissue-Specific	Liver	exon	F13B
9:99608497|99625342	Tissue-Specific	Liver	intergenic_region	nan
8:69651282|69654201	Tissue-Specific	Liver	exon	nan
6:142455346|142470638	Tissue-Specific	Liver	exon	nan
13:124544438|124552428	Tissue-Specific	Liver	exon	ABCA6
13:135713629|135739109	Tissue-Specific	Liver	exon	VMP1
7:49053046|49063033	Tissue-Specific	Liver	exon	ACSL1
7:20656117|20657619	Tissue-Specific	Liver	exon	CPS1
17:5554278|5557127	Tissue-Specific	Liver	exon	CPS1
3:18002015|18005066	Tissue-Specific	Liver	exon	ACSL3
13:124524484|124552428	Tissue-Specific	Liver	exon	SHANK2
13:29475924|29497860	Tissue-Specific	Liver	exon	ABLIM3
5:62355007|62383339	Tissue-Specific	Liver	exon	C8A
11:21256152|21275708	Tissue-Specific	Liver	exon	PDE8A
5:52164812|52169113	Tissue-Specific	Liver	exon	GBA3
4:32807112|32833310	Tissue-Specific	Liver	exon	ALB
13:124524484|124532562	Tissue-Specific	Liver	exon	TEX12
18:11424698|11447863	Tissue-Specific	Liver	exon	nan
1:7073512|7077253	Tissue-Specific	Liver	exon	C5
13:74945343|74948215	Tissue-Specific	Liver	exon	NMT2
13:124532390|124546019	Tissue-Specific	Liver	exon	NMT2
11:21256152|21281234	Tissue-Specific	Liver	exon	HRG
2:26514558|26519328	Tissue-Specific	Liver	exon	GBE1
X:39036989|39047521	Tissue-Specific	Liver	exon	ATIC
13:89448761|89457044	Tissue-Specific	Liver	exon	HNF4A
13:89439645|89447329	Tissue-Specific	Liver	exon	AKR1D1
5:62383831|62389711	Tissue-Specific	Liver	exon	TAT
13:89451964|89457044	Tissue-Specific	Liver	exon	nan
4:32813934|32833310	Tissue-Specific	Liver	exon	PCSK9
11:55598249|55599667	Tissue-Specific	Liver	exon	GPLD1
13:89423754|89449015	Tissue-Specific	Liver	exon	SLC17A4
11:21258739|21281234	Tissue-Specific	Liver	exon	IREB2
AEMK02000698.1:2516662|2518941	Tissue-Specific	Liver	exon	AFM
9:129673704|129677373	Tissue-Specific	Liver	exon	MAOB
6:14931077|14937268	Tissue-Specific	Liver	exon	MBNL3
13:124510741|124511537	Tissue-Specific	Liver	exon	UBR1
AEMK02000698.1:2516662|2546905	Tissue-Specific	Liver	exon	KNG1
13:74948061|74963720	Tissue-Specific	Liver	exon	CYP2C42
8:88608460|88635705	Tissue-Specific	Liver	intergenic_region	nan
2:2571405|2576539	Tissue-Specific	Liver	exon	ACSL3
5:21868121|21875111	Tissue-Specific	Liver	exon	DPYS
2:87821310|87832068	Tissue-Specific	Liver	exon	PPARA
17:5554278|5554727	Tissue-Specific	Liver	exon	AMDHD1
2:26496798|26505121	Tissue-Specific	Liver	exon	CTH
12:11800135|11808818	Tissue-Specific	Liver	exon	ALB
3:6651530|6660663	Tissue-Specific	Liver	exon	AFM
1:261027093|261036453	Tissue-Specific	Liver	exon	AFM
16:24536528|24550492	Tissue-Specific	Liver	exon	nan
13:124508949|124511537	Tissue-Specific	Liver	exon	C5
5:51884381|51889554	Tissue-Specific	Liver	exon	KNG1
11:21266539|21281234	Tissue-Specific	Liver	exon	GLUD1
10:46680801|46706608	Tissue-Specific	Liver	exon	CYP2C42
13:147878447|147912012	Tissue-Specific	Liver	exon	C3
16:21524717|21531355	Tissue-Specific	Liver	exon	GYS2
5:54805981|54811183	Tissue-Specific	Liver	exon	nan
1:261027093|261040678	Tissue-Specific	Liver	exon	PIK3C2G
15:113273695|113275454	Tissue-Specific	Liver	exon	SLC17A2
3:102283996|102298741	Tissue-Specific	Liver	exon	ALB
13:22318659|22352250	Tissue-Specific	Liver	exon	nan
2:68891723|68892509	Tissue-Specific	Liver	exon	MYO1B
1:239179645|239185499	Tissue-Specific	Liver	exon	DAB2
2:27910180|27911796	Tissue-Specific	Liver	exon	SHANK2
AEMK02000698.1:2516662|2530568	Tissue-Specific	Liver	exon	nan
17:5554278|5556429	Tissue-Specific	Liver	exon	PTPRF
2:123373665|123380557	Tissue-Specific	Liver	exon	FAH
8:16946033|16947639	Tissue-Specific	Liver	exon	TUT7
12:35952253|35999542	Tissue-Specific	Liver	exon	P4HA1
2:150332941|150359791	Tissue-Specific	Liver	exon	HSD17B4
8:69651282|69657110	Tissue-Specific	Liver	intron	GGH
10:10163985|10170555	Tissue-Specific	Liver	exon	FGG
1:106721012|106732919	Tissue-Specific	Liver	exon	ITIH2
8:44713066|44721438	Tissue-Specific	Liver	exon	NECTIN3
11:69070568|69080842	Tissue-Specific	Liver	intron	nan
9:39899291|39902452	Tissue-Specific	Liver	exon	P4HA1
AEMK02000698.1:2588772|2592712	Tissue-Specific	Liver	exon	SERPING1
15:113321582|113324731	Tissue-Specific	Liver	intergenic_region	nan
13:148522545|148535551	Tissue-Specific	Liver	exon	nan
2:72451895|72452340	Tissue-Specific	Liver	exon	nan
4:81469946|81482238	Tissue-Specific	Liver	exon	VWA8
13:74945343|74949990	Tissue-Specific	Liver	exon	TF
AEMK02000698.1:2496689|2504171	Tissue-Specific	Liver	exon	KNG1
6:157392302|157394379	Tissue-Specific	Liver	exon	KNG1
13:89442866|89457044	Tissue-Specific	Liver	exon	SLC39A14
13:89423754|89424993	Tissue-Specific	Liver	exon	ATE1
16:24526713|24550492	Tissue-Specific	Liver	intron	FGL1
13:148516449|148534946	Tissue-Specific	Liver	exon	F11
2:87915972|87924493	Tissue-Specific	Liver	intron	HNF4A
9:93232159|93235401	Tissue-Specific	Liver	exon	AKR1D1
15:47083692|47099016	Tissue-Specific	Liver	exon	CAT
18:11436848|11443952	Tissue-Specific	Liver	exon	ALDH7A1
2:123373665|123385996	Tissue-Specific	Liver	exon	nan
14:106294756|106295227	Tissue-Specific	Liver	exon	HAO2
13:92028035|92032062	Tissue-Specific	Liver	exon	nan
2:26509447|26519328	Tissue-Specific	Liver	exon	CDH1
1:30989809|30991395	Tissue-Specific	Liver	intergenic_region	nan
X:40595987|40634199	Tissue-Specific	Liver	exon	nan
5:3310248|3313241	Tissue-Specific	Liver	exon	ALB
8:69723174|69727203	Tissue-Specific	Liver	exon	AFM
14:75855449|75878312	Tissue-Specific	Liver	exon	nan
8:69735415|69745286	Tissue-Specific	Liver	exon	TARS3
13:135695804|135739109	Tissue-Specific	Liver	exon	C5
7:19311488|19317168	Tissue-Specific	Liver	exon	MTARC2
6:115874233|115882816	Tissue-Specific	Liver	exon	CPB2
7:73526950|73540264	Tissue-Specific	Liver	exon	CPN1
8:69733591|69762212	Tissue-Specific	Liver	exon	CPS1
15:39674327|39684519	Tissue-Specific	Liver	exon	PSD3
1:145740540|145741595	Tissue-Specific	Liver	exon	CAT
4:32807112|32814123	Tissue-Specific	Liver	exon	FBXO31
12:39494078|39522620	Tissue-Specific	Liver	exon	CDH1
5:21868121|21920610	Tissue-Specific	Liver	exon	SLC17A3
6:74775468|74778410	Tissue-Specific	Liver	exon	FOXN3
6:14575880|14576870	Tissue-Specific	Liver	exon	ALB
X:26205892|26210007	Tissue-Specific	Liver	exon	nan
12:11787863|11789561	Tissue-Specific	Liver	exon	KNG1
18:43322169|43352834	Tissue-Specific	Liver	exon	AKR1D1
11:25209180|25240454	Tissue-Specific	Liver	exon	CAT
15:71259536|71317594	Tissue-Specific	Liver	exon	IQGAP2
2:139706337|139736914	Tissue-Specific	Liver	exon	nan
5:5083613|5085091	Tissue-Specific	Liver	exon	CDK19
5:52159372|52165048	Tissue-Specific	Liver	exon	nan
9:84694823|84723134	Tissue-Specific	Liver	intron	NECTIN3
10:63645756|63647595	Tissue-Specific	Liver	exon	CDH1
5:54763919|54800274	Tissue-Specific	Liver	exon	RORC
5:21906486|21915147	Tissue-Specific	Liver	exon	ALB
4:32811655|32833310	Tissue-Specific	Liver	exon	PROX1
1:145318344|145335637	Tissue-Specific	Liver	exon	nan
AEMK02000698.1:2546729|2546905	Tissue-Specific	Liver	exon	PCSK6
13:124545847|124552428	Tissue-Specific	Liver	exon	ABCA6
2:58622550|58622958	Tissue-Specific	Liver	exon	VWA8
8:69715909|69719485	Tissue-Specific	Liver	exon	CORIN
7:53749578|53750794	Tissue-Specific	Liver	exon	VWA8
15:71259536|71267083	Tissue-Specific	Liver	exon	KLF12
7:46862449|46882706	Tissue-Specific	Liver	exon	ACSS3
8:69715909|69725345	Tissue-Specific	Liver	exon	PRDM10
6:159254438|159263775	Tissue-Specific	Liver	exon	PARD3
9:63868064|63882753	Tissue-Specific	Liver	intergenic_region	nan
13:89439645|89449015	Tissue-Specific	Liver	exon	CYP3A29
5:49859025|49941728	Tissue-Specific	Liver	exon	DPF3
9:129533552|129563873	Tissue-Specific	Liver	exon	CORIN
8:74600886|74601774	Tissue-Specific	Liver	exon	nan
9:119813914|119818762	Tissue-Specific	Liver	exon	C5
5:83645870|83662851	Tissue-Specific	Liver	exon	NMT2
15:113311176|113324731	Tissue-Specific	Liver	exon	AKR1C2
5:52153158|52165048	Tissue-Specific	Liver	exon	CPB2
11:21258739|21275708	Tissue-Specific	Liver	exon	CPB2
14:106294756|106299141	Tissue-Specific	Liver	exon	CPB2
4:81428829|81434805	Tissue-Specific	Liver	exon	PCCA
6:142455346|142468767	Tissue-Specific	Liver	exon	nan
8:121096296|121099210	Tissue-Specific	Liver	exon	ABCA6
14:111195336|111200349	Tissue-Specific	Liver	exon	ARSG
8:69647139|69654201	Tissue-Specific	Liver	intron	SARM1
8:69647885|69651411	Tissue-Specific	Liver	intergenic_region	nan
1:145555759|145572777	Tissue-Specific	Liver	exon	ACAD11
13:148496646|148499206	Tissue-Specific	Liver	exon	TF
5:79647688|79654388	Tissue-Specific	Liver	exon	TF
8:43730710|43732888	Tissue-Specific	Liver	exon	CP
2:87799990|87832068	Tissue-Specific	Liver	exon	CP
13:22311956|22335113	Tissue-Specific	Liver	exon	CP
9:116186722|116188948	Tissue-Specific	Liver	exon	CP
12:1632051|1653791	Tissue-Specific	Liver	exon	CP
14:75855449|75897301	Tissue-Specific	Liver	exon	CP
16:47636128|47645029	Tissue-Specific	Liver	exon	CP
5:52167588|52174508	Tissue-Specific	Liver	exon	KNG1
6:14577592|14579289	Tissue-Specific	Liver	exon	nan
5:52164812|52174508	Tissue-Specific	Liver	exon	NECTIN3
10:46680801|46686052	Tissue-Specific	Liver	intergenic_region	nan
8:69715909|69721874	Tissue-Specific	Liver	exon	FGL1
15:65105505|65117807	Tissue-Specific	Liver	exon	nan
13:123303638|123315717	Tissue-Specific	Liver	exon	nan
13:73778764|73792104	Tissue-Specific	Liver	exon	CAT
13:151173285|151200940	Tissue-Specific	Liver	exon	CAT
4:97392346|97394319	Tissue-Specific	Liver	exon	CAT
8:44719535|44721438	Tissue-Specific	Liver	exon	DEPDC7
9:129605321|129677373	Tissue-Specific	Liver	exon	nan
16:26030007|26033155	Tissue-Specific	Liver	exon	DMGDH
2:87821310|87859390	Tissue-Specific	Liver	exon	DMGDH
14:106294756|106302379	Tissue-Specific	Liver	exon	BHMT
2:26504983|26519328	Tissue-Specific	Liver	exon	KLHL3
14:115172309|115199940	Tissue-Specific	Liver	exon	CYP3A29
11:76020269|76038044	Tissue-Specific	Liver	exon	CYP3A29
2:87831341|87859394	Tissue-Specific	Liver	exon	CYP3A29
14:87984301|87991635	Tissue-Specific	Liver	exon	CYP3A29
17:46800006|46808946	Tissue-Specific	Liver	exon	DPYS
2:114762651|114785638	Tissue-Specific	Liver	exon	DPYS
15:45869058|45879911	Tissue-Specific	Liver	exon	DPYS
11:75862629|75897755	Tissue-Specific	Liver	exon	F5
6:1974253|1979270	Tissue-Specific	Liver	intron	HAO2
2:2728621|2747132	Tissue-Specific	Liver	exon	nan
4:87719846|87733052	Tissue-Specific	Liver	exon	SOX5
15:96002500|96007318	Tissue-Specific	Liver	exon	GYS2
8:74555712|74559843	Tissue-Specific	Liver	exon	nan
13:124521558|124546019	Tissue-Specific	Liver	exon	nan
9:129587409|129677373	Tissue-Specific	Liver	exon	nan
10:57167881|57194267	Tissue-Specific	Liver	intron	nan
14:134275520|134282673	Tissue-Specific	Liver	exon	nan
6:109031384|109082598	Tissue-Specific	Liver	exon	PAH
11:46069180|46155680	Tissue-Specific	Liver	exon	NR1H4
15:124587035|124602627	Tissue-Specific	Liver	exon	TAT
4:70964765|70968615	Tissue-Specific	Liver	exon	MOCOS
15:117631742|117639443	Tissue-Specific	Liver	exon	CTH
7:111222954|111275414	Tissue-Specific	Liver	exon	SLC17A3
10:10201831|10207599	Tissue-Specific	Liver	exon	MMUT
X:108502830|108521969	Tissue-Specific	Liver	exon	ELOVL5
AEMK02000698.1:2511224|2546905	Tissue-Specific	Liver	exon	ALB
5:62365941|62369015	Tissue-Specific	Liver	exon	ALB
6:159201656|159224483	Tissue-Specific	Liver	exon	ALB
13:89423754|89457044	Tissue-Specific	Liver	exon	nan
1:30989809|30990182	Tissue-Specific	Liver	exon	FGB
5:62373362|62377298	Tissue-Specific	Liver	exon	nan
5:62358771|62369015	Tissue-Specific	Liver	exon	BCO2
2:26516504|26519328	Tissue-Specific	Liver	exon	FMO1
AEMK02000452.1:398066|402760	Tissue-Specific	Liver	exon	C4BPA
14:6674629|6680524	Tissue-Specific	Liver	intron	nan
5:54680382|54710779	Tissue-Specific	Liver	exon	nan
5:62355007|62377298	Tissue-Specific	Liver	exon	nan
15:124587040|124594858	Tissue-Specific	Liver	intron	nan
8:65301742|65310079	Tissue-Specific	Liver	exon	nan
9:129563772|129572640	Tissue-Specific	Liver	exon	PLG
8:69649353|69652746	Tissue-Specific	Liver	exon	TF
4:85039073|85042510	Tissue-Specific	Liver	exon	PHLDB2
18:11443836|11447863	Tissue-Specific	Liver	exon	HHLA2
15:96012648|96013455	Tissue-Specific	Liver	exon	CYP2C42
10:48904200|48911562	Tissue-Specific	Liver	exon	CYP2C42
2:13331922|13334236	Tissue-Specific	Liver	intron	ZRANB1
AEMK02000698.1:2493984|2496859	Tissue-Specific	Liver	exon	ACSL1
1:226187468|226194657	Tissue-Specific	Liver	exon	KLKB1
2:87840789|87859394	Tissue-Specific	Liver	exon	C6
15:39671057|39684519	Tissue-Specific	Liver	exon	CRLS1
17:41416193|41417808	Tissue-Specific	Liver	exon	CAT
12:11258622|11261616	Tissue-Specific	Liver	exon	HAPLN4
7:62362948|62377463	Tissue-Specific	Liver	exon	CYP3A29
7:115590767|115591380	Tissue-Specific	Liver	exon	PNPLA3
13:124524484|124546019	Tissue-Specific	Liver	exon	GYS2
13:173821241|173834075	Tissue-Specific	Liver	exon	nan
14:131495285|131560323	Tissue-Specific	Liver	exon	nan
6:119963438|119981373	Tissue-Specific	Liver	exon	nan
12:11250189|11268222	Tissue-Specific	Liver	intron	nan
15:117662473|117665522	Tissue-Specific	Liver	exon	SLC41A2
5:54700907|54710779	Tissue-Specific	Liver	exon	ACSS3
13:89427501|89441031	Tissue-Specific	Liver	intergenic_region	nan
9:129621012|129677373	Tissue-Specific	Liver	exon	SCP2
5:81391425|81405366	Tissue-Specific	Liver	exon	ALDH1L1
17:46834737|46835848	Tissue-Specific	Liver	exon	nan
6:115422371|115426309	Tissue-Specific	Liver	exon	MSMO1
5:100325826|100373794	Tissue-Specific	Liver	exon	TDO2
X:27122083|27142550	Tissue-Specific	Liver	exon	ALB
AEMK02000698.1:2493984|2516844	Tissue-Specific	Liver	exon	nan
9:56663773|56668549	Tissue-Specific	Liver	intergenic_region	nan
5:62351623|62355175	Tissue-Specific	Liver	exon	CD36
14:14983402|14984684	Tissue-Specific	Liver	intergenic_region	nan
4:101595240|101600824	Tissue-Specific	Liver	exon	nan
16:26039846|26041048	Tissue-Specific	Liver	exon	nan
18:11438180|11447863	Tissue-Specific	Liver	exon	nan
AEMK02000698.1:2493984|2530568	Tissue-Specific	Liver	intron	nan
4:101595240|101600829	Tissue-Specific	Liver	exon	nan
18:27220913|27230119	Tissue-Specific	Liver	intergenic_region	nan
1:215644030|215669813	Tissue-Specific	Liver	exon	ITGA9
6:167720421|167720858	Tissue-Specific	Liver	exon	HRG
5:51895386|51905586	Tissue-Specific	Liver	exon	ETS2
13:74948061|74952821	Tissue-Specific	Liver	exon	CPN1
13:151173285|151177584	Tissue-Specific	Liver	exon	UPP2
2:129675013|129698845	Tissue-Specific	Liver	exon	AKR1D1
14:122546750|122558010	Tissue-Specific	Liver	intron	nan
13:148499068|148534946	Tissue-Specific	Liver	exon	AFM
9:39891300|39893244	Tissue-Specific	Liver	exon	FGG
12:44672079|44672715	Tissue-Specific	Liver	exon	SLC7A11
AEMK02000698.1:2491644|2530568	Tissue-Specific	Liver	intron	PROX1
15:64771605|64834650	Tissue-Specific	Liver	exon	PROX1
1:128427695|128431926	Tissue-Specific	Liver	exon	FERMT2
5:81405183|81418619	Tissue-Specific	Liver	exon	ALDH1A1
12:11253178|11278510	Tissue-Specific	Liver	exon	ACBD5
8:112444103|112454221	Tissue-Specific	Liver	exon	CPB2
2:87915972|87923053	Tissue-Specific	Liver	exon	VWA8
8:118781366|118783540	Tissue-Specific	Liver	exon	PCCA
17:9050554|9063287	Tissue-Specific	Liver	intron	nan
14:75855449|75875050	Tissue-Specific	Liver	exon	nan
6:7020462|7037336	Tissue-Specific	Liver	exon	BAIAP2
16:20585265|20596048	Tissue-Specific	Liver	intron	CCL4
9:63868064|63891931	Tissue-Specific	Liver	intron	ITGA9
8:37599357|37605348	Tissue-Specific	Liver	exon	CP
2:26509447|26510836	Tissue-Specific	Liver	exon	AADAC
17:14885760|14889597	Tissue-Specific	Liver	exon	MAP3K13
13:124521558|124534065	Tissue-Specific	Liver	exon	KNG1
3:6633803|6645357	Tissue-Specific	Liver	exon	nan
3:6633803|6636950	Tissue-Specific	Liver	exon	HHLA2
8:74555000|74561357	Tissue-Specific	Liver	exon	GPAM
11:75797931|75862892	Tissue-Specific	Liver	exon	nan
15:95965139|95990609	Tissue-Specific	Liver	exon	ACVR1
7:20651083|20657619	Tissue-Specific	Liver	exon	AGXT2
12:18794363|18846956	Tissue-Specific	Liver	exon	DAB2
5:79620408|79682972	Tissue-Specific	Liver	exon	PSD3
7:43616015|43620359	Tissue-Specific	Liver	exon	POU6F2
7:47482893|47492853	Tissue-Specific	Liver	exon	DMGDH
6:18084414|18095608	Tissue-Specific	Liver	exon	DMGDH
2:85494521|85518807	Tissue-Specific	Liver	exon	DMGDH
5:100366765|100393190	Tissue-Specific	Liver	exon	DMGDH
7:52430652|52463339	Tissue-Specific	Liver	exon	BHMT
6:18088916|18096335	Tissue-Specific	Liver	exon	KLHL3
10:65615743|65620737	Tissue-Specific	Liver	exon	PIK3C2G
1:169782984|169789871	Tissue-Specific	Liver	exon	SLC41A2
10:46706438|46717523	Tissue-Specific	Liver	intergenic_region	nan
5:100433025|100457404	Tissue-Specific	Liver	exon	OSBPL1A
5:49813301|49861427	Tissue-Specific	Liver	exon	SCP2
2:139698624|139718947	Tissue-Specific	Liver	exon	GPLD1
6:18092053|18095608	Tissue-Specific	Liver	exon	TTC6
X:34370906|34382105	Tissue-Specific	Liver	exon	TDO2
5:103186722|103268860	Tissue-Specific	Liver	exon	FGB
9:67740703|67756375	Tissue-Specific	Liver	exon	FMO1
12:11773849|11789561	Tissue-Specific	Liver	exon	SERPINC1
11:69121334|69204455	Tissue-Specific	Liver	intergenic_region	nan
7:19297758|19303423	Tissue-Specific	Liver	exon	nan
7:46862439|46870204	Tissue-Specific	Liver	exon	nan
11:25130960|25224424	Tissue-Specific	Liver	intergenic_region	nan
17:13231115|13243821	Tissue-Specific	Liver	exon	ARSG
8:37600374|37605348	Tissue-Specific	Liver	exon	ITGA2B
1:145613198|145638870	Tissue-Specific	Liver	exon	CP
2:87840789|87851608	Tissue-Specific	Liver	exon	FDFT1
7:96083238|96100782	Tissue-Specific	Liver	exon	GPAM
2:8590721|8592509	Tissue-Specific	Liver	intron	nan
11:25130960|25152133	Tissue-Specific	Liver	exon	MYO1B
13:123336694|123346342	Tissue-Specific	Liver	exon	C6
8:74599676|74604427	Tissue-Specific	Liver	exon	LBP
X:6436001|6437792	Tissue-Specific	Liver	intron	MAN2A1
1:76606061|76651641	Tissue-Specific	Liver	intron	nan
6:18079656|18081698	Tissue-Specific	Liver	intron	SOX5
10:29004273|29015131	Tissue-Specific	Liver	exon	PAH
15:47090684|47099016	Tissue-Specific	Liver	exon	NAV3
5:51884381|51888998	Tissue-Specific	Liver	exon	RSC1A1
2:26502035|26519328	Tissue-Specific	Liver	exon	SLC17A2
2:26502035|26509599	Tissue-Specific	Liver	exon	nan
8:115813182|115827826	Tissue-Specific	Liver	exon	FMO1
14:111195336|111217196	Tissue-Specific	Liver	exon	DMD
18:55024311|55027679	Tissue-Specific	Liver	exon	GLDC
17:12935433|12939377	Tissue-Specific	Liver	exon	ITGA9
15:75442014|75448290	Tissue-Specific	Liver	exon	ABCB11
14:122553097|122561535	Tissue-Specific	Liver	exon	CAT
7:115609068|115609726	Tissue-Specific	Liver	exon	DMGDH
2:26504983|26510836	Tissue-Specific	Liver	exon	AGMO
15:45877613|45884945	Tissue-Specific	Liver	exon	BCO1
9:129557375|129575313	Tissue-Specific	Liver	exon	OTC
6:14918281|14937268	Tissue-Specific	Liver	exon	CYP2C42
13:22334990|22397150	Tissue-Specific	Liver	intergenic_region	nan
9:63868064|63885945	Tissue-Specific	Liver	exon	CAT
1:182535317|182565652	Tissue-Specific	Liver	exon	CENPC
11:25273271|25306471	Tissue-Specific	Liver	exon	ALB
6:74824455|74840664	Tissue-Specific	Liver	exon	MYO1B
13:202473309|202475494	Tissue-Specific	Liver	exon	ELOVL5
8:69647139|69657110	Tissue-Specific	Liver	exon	MAP3K13
1:169807036|169825867	Tissue-Specific	Liver	exon	KLKB1
AEMK02000361.1:637883|657686	Tissue-Specific	Longissimus	intron	SAMD12
4:20430576|20433129	Tissue-Specific	Longissimus	exon	FSD2
3:71177121|71179376	Tissue-Specific	Longissimus	intron	LARGE1
15:615792|632268	Tissue-Specific	Longissimus	intron	DYSF
10:23546471|23549237	Tissue-Specific	Longissimus	exon	CACNA1S
12:61231989|61233325	Tissue-Specific	Longissimus	intergenic_region	nan
7:52173078|52185634	Tissue-Specific	Longissimus	intergenic_region	nan
15:84428248|84431003	Tissue-Specific	Longissimus	exon	NEB
8:69876251|69880317	Tissue-Specific	Lung	exon	nan
5:776735|778112	Tissue-Specific	Lung	exon	MLLT10
2:2134407|2139037	Tissue-Specific	Lung	exon	FLVCR2
12:60348042|60353600	Tissue-Specific	Lung	exon	BRD1
9:92047369|92049234	Tissue-Specific	Lung	exon	DUOX2
18:30174152|30192349	Tissue-Specific	Lung	exon	DUOX2
1:126625526|126626224	Tissue-Specific	Lung	exon	PPP6R2
18:30186084|30260224	Tissue-Specific	Lung	exon	ATP8B4
3:3610346|3614777	Tissue-Specific	Lung	exon	SLC12A7
12:3589853|3599529	Tissue-Specific	Lung	exon	NLRP3
16:79370562|79371161	Tissue-Specific	Lung	exon	EMILIN2
16:79370562|79380261	Tissue-Specific	Lung	exon	HMGXB3
16:79381506|79385238	Tissue-Specific	Lung	exon	DOP1B
9:92047369|92061421	Tissue-Specific	Lung	exon	ZBTB34
5:776735|799578	Tissue-Specific	Lung	exon	COLEC12
15:120438376|120440963	Tissue-Specific	Lung	exon	MCTP2
12:3589853|3599602	Tissue-Specific	Lung	exon	CBL
2:151057065|151065003	Tissue-Specific	Lung	exon	EXD3
1:26485543|26485852	Tissue-Specific	Lung	exon	RXRA
1:121731741|121774911	Tissue-Specific	Lung	exon	PGS1
12:3608485|3618789	Tissue-Specific	Lung	exon	THAP4
1:126624333|126626224	Tissue-Specific	Lung	exon	THAP4
5:792546|795087	Tissue-Specific	Lung	exon	ADAM17
AEMK02000452.1:3325019|3335057	Tissue-Specific	Lung	exon	GLB1
5:788738|795087	Tissue-Specific	Lung	exon	SKI
1:121831269|121850568	Tissue-Specific	Lung	exon	LATS2
1:121844177|121850568	Tissue-Specific	Lung	exon	CLEC16A
1:121806162|121820841	Tissue-Specific	Lung	exon	MAML1
7:47896406|47902656	Tissue-Specific	Lung	exon	HERC5
8:136568711|136582462	Tissue-Specific	Lung	exon	RXRA
1:273776347|273777030	Tissue-Specific	Lung	exon	ATAD2B
2:11703762|11712043	Tissue-Specific	Lung	exon	NPC1
15:140199412|140221229	Tissue-Specific	Lung	exon	SYTL5
2:151489572|151490410	Tissue-Specific	Lung	exon	OSBPL2
2:56892733|56897960	Tissue-Specific	Lung	exon	ZDHHC7
5:80209663|80213889	Tissue-Specific	Lung	exon	WDFY2
16:76213014|76218974	Tissue-Specific	Lung	exon	MYO1D
12:235698|236083	Tissue-Specific	Lung	exon	RASGEF1B
6:103751849|103758513	Tissue-Specific	Lung	exon	GPNMB
15:83180116|83212752	Tissue-Specific	Lung	exon	SLC38A10
9:92052138|92061421	Tissue-Specific	Lung	exon	MMP14
5:103201167|103202193	Tissue-Specific	Lung	exon	ARHGEF10L
12:2200404|2204127	Tissue-Specific	Lung	exon	ARHGEF7
7:34433693|34445917	Tissue-Specific	Lung	exon	SLC5A10
18:30230633|30294197	Tissue-Specific	Lung	exon	SLC38A10
2:151040092|151052939	Tissue-Specific	Lung	exon	nan
18:30229816|30260224	Tissue-Specific	Lung	exon	CTSS
13:2369671|2370297	Tissue-Specific	Lung	exon	YTHDF1
9:127830743|127863515	Tissue-Specific	Lung	exon	nan
2:25835943|25838898	Tissue-Specific	Lung	exon	NAV3
9:92055394|92066929	Tissue-Specific	Lung	exon	DOCK8
8:130582353|130584174	Tissue-Specific	Lung	exon	FOXK2
12:1492111|1494267	Tissue-Specific	Lung	exon	ABCA3
9:135004414|135010392	Tissue-Specific	Lung	exon	ANKRD11
12:2110591|2113463	Tissue-Specific	Lung	exon	BANP
7:76202079|76203168	Tissue-Specific	Lung	intergenic_region	nan
9:124107117|124120873	Tissue-Specific	Lung	exon	EPN2
6:76188097|76219804	Tissue-Specific	Lung	exon	LIMK1
2:78831921|78834612	Tissue-Specific	Lung	exon	AP2A2
9:92056167|92058003	Tissue-Specific	Lung	exon	PGS1
5:788738|799578	Tissue-Specific	Lung	exon	HELZ
15:140220065|140221229	Tissue-Specific	Lung	exon	CHD6
6:108408209|108409783	Tissue-Specific	Lung	exon	OSBPL11
6:76188097|76197519	Tissue-Specific	Lung	exon	BRD1
18:48423063|48426394	Tissue-Specific	Lung	exon	nan
8:964857|979554	Tissue-Specific	Lung	exon	HDAC4
5:80180368|80187058	Tissue-Specific	Lung	exon	TNRC18
2:617038|618581	Tissue-Specific	Lung	exon	ARHGEF10L
13:134737386|134756612	Tissue-Specific	Lung	exon	BRF1
1:120203811|120205909	Tissue-Specific	Lung	exon	DZIP1L
2:151059995|151065003	Tissue-Specific	Lung	exon	IGF2R
3:3935802|3941028	Tissue-Specific	Lung	exon	TNFAIP3
12:573171|574942	Tissue-Specific	Lung	exon	ENPP1
13:134737386|134769304	Tissue-Specific	Lung	exon	ATP8B4
5:59569752|59570680	Tissue-Specific	Lung	exon	ATP8B4
9:92055394|92061421	Tissue-Specific	Lung	exon	ATP8B4
12:1484194|1494267	Tissue-Specific	Lung	exon	ATP8B4
1:273771031|273785206	Tissue-Specific	Lung	exon	ATP8B4
1:121871577|121896972	Tissue-Specific	Lung	exon	LPAR1
1:267459068|267460596	Tissue-Specific	Lung	exon	CTSL
15:83180116|83224284	Tissue-Specific	Lung	exon	METRNL
9:135001722|135004587	Tissue-Specific	Lung	exon	CSNK1D
8:136568711|136593973	Tissue-Specific	Lung	exon	nan
12:785955|787695	Tissue-Specific	Lung	exon	nan
18:30293632|30294197	Tissue-Specific	Lung	exon	PGS1
6:519828|589023	Tissue-Specific	Lung	exon	nan
13:96499557|96500512	Tissue-Specific	Lung	exon	TIPARP
3:114835392|114836075	Tissue-Specific	Lung	exon	OSBPL11
14:15017355|15019133	Tissue-Specific	Lung	exon	RUNX1
AEMK02000682.1:582138|586862	Tissue-Specific	Lung	exon	nan
11:78343010|78356609	Tissue-Specific	Lung	exon	SLC11A1
1:121844177|121896972	Tissue-Specific	Lung	exon	DUSP1
3:39697332|39703005	Tissue-Specific	Lung	exon	nan
2:11705837|11707064	Tissue-Specific	Lung	exon	SLC12A7
18:30219590|30294197	Tissue-Specific	Lung	exon	SLC12A7
11:16093399|16116109	Tissue-Specific	Lung	intergenic_region	nan
12:60175882|60179349	Tissue-Specific	Lung	intergenic_region	nan
7:76180016|76181197	Tissue-Specific	Lung	intergenic_region	nan
AEMK02000682.1:304068|315913	Tissue-Specific	Lung	intergenic_region	nan
8:136577110|136582462	Tissue-Specific	Lung	intergenic_region	nan
9:349997|354999	Tissue-Specific	Lung	intergenic_region	nan
2:151057065|151060377	Tissue-Specific	Lung	exon	CARS1
7:47896406|47924280	Tissue-Specific	Lung	exon	CD44
6:1051422|1056649	Tissue-Specific	Lung	exon	NLRP3
16:51458905|51459611	Tissue-Specific	Lung	exon	HMGXB3
3:126835030|126846553	Tissue-Specific	Lung	exon	HMGXB3
12:42242539|42275790	Tissue-Specific	Lung	exon	FOXK1
2:56949912|56957368	Tissue-Specific	Lung	exon	GGA2
3:22723621|22730547	Tissue-Specific	Lung	exon	CCDC88A
10:27672664|27672888	Tissue-Specific	Lung	exon	BRD1
17:61657594|61664001	Tissue-Specific	Lung	exon	BRD1
6:63879633|63880675	Tissue-Specific	Lung	exon	BRD1
AEMK02000682.1:298731|315913	Tissue-Specific	Lung	exon	BRD1
11:77489152|77503607	Tissue-Specific	Lung	exon	EMILIN2
1:251874674|251875421	Tissue-Specific	Lung	exon	CDYL
15:120443513|120444386	Tissue-Specific	Lung	intergenic_region	nan
6:103751849|103753774	Tissue-Specific	Lung	exon	TBC1D2B
1:7386167|7396042	Tissue-Specific	Lung	exon	TBC1D2B
13:198442497|198468393	Tissue-Specific	Lung	exon	SLC7A7
11:462432|463642	Tissue-Specific	Lung	exon	MCTP2
7:84803739|84856641	Tissue-Specific	Lung	intron	ARAP2
9:92056167|92056478	Tissue-Specific	Lung	exon	RASGEF1B
5:88940597|88967122	Tissue-Specific	Lung	exon	GPNMB
3:11270017|11271721	Tissue-Specific	Lung	exon	GPNMB
14:49352290|49380521	Tissue-Specific	Lung	exon	GPNMB
14:49372437|49380521	Tissue-Specific	Lung	intron	GPNMB
15:138452796|138483055	Tissue-Specific	Lung	exon	GPNMB
10:64783828|64794953	Tissue-Specific	Lung	exon	NPL
3:85889607|85928604	Tissue-Specific	Lung	exon	EHMT1
12:3615382|3618789	Tissue-Specific	Lung	exon	EHMT1
16:79388838|79391379	Tissue-Specific	Lung	exon	EXD3
12:13501057|13501309	Tissue-Specific	Lung	exon	QSOX2
6:34131163|34132908	Tissue-Specific	Lung	exon	PFKFB3
9:331887|335138	Tissue-Specific	Lung	exon	MPHOSPH8
7:34421442|34425138	Tissue-Specific	Lung	exon	ATP11A
18:30244544|30294197	Tissue-Specific	Lung	exon	CTSB
7:2951986|2963888	Tissue-Specific	Lung	exon	AGPS
16:79382230|79385238	Tissue-Specific	Lung	exon	AGPS
6:1442180|1451841	Tissue-Specific	Lung	exon	SLC12A7
AEMK02000328.1:340734|342617	Tissue-Specific	Lung	exon	SLC12A7
7:25153600|25154923	Tissue-Specific	Lung	exon	GALNTL5
1:221337571|221339131	Tissue-Specific	Lung	intergenic_region	nan
18:5367279|5373688	Tissue-Specific	Lung	exon	UPP1
6:3801194|3804974	Tissue-Specific	Lung	exon	STX3
4:98422323|98425826	Tissue-Specific	Lung	exon	STX3
AEMK02000682.1:1457351|1464741	Tissue-Specific	Lung	exon	HMGXB3
17:62574150|62583289	Tissue-Specific	Lung	exon	nan
5:792546|799578	Tissue-Specific	Lung	exon	TXNRD1
12:2169793|2182153	Tissue-Specific	Lung	exon	PLXNC1
AEMK02000682.1:582138|586171	Tissue-Specific	Lung	exon	NOD2
17:62333968|62335485	Tissue-Specific	Lung	intergenic_region	nan
13:68956864|68959073	Tissue-Specific	Lung	exon	MCTP2
12:3594453|3599602	Tissue-Specific	Lung	exon	NSD2
7:84826112|84844747	Tissue-Specific	Lung	intergenic_region	nan
11:1231273|1238890	Tissue-Specific	Lung	exon	RASGEF1B
6:64236415|64238882	Tissue-Specific	Lung	exon	DENND5A
7:84912878|84913413	Tissue-Specific	Lung	exon	GPNMB
17:39143283|39169959	Tissue-Specific	Lung	exon	DMXL2
X:34009848|34035247	Tissue-Specific	Lung	exon	PGS1
3:38500631|38502398	Tissue-Specific	Lung	exon	SLC11A1
6:105968218|105970363	Tissue-Specific	Lung	exon	GMEB2
5:313664|319318	Tissue-Specific	Lung	exon	NDST1
X:64316847|64388192	Tissue-Specific	Lung	exon	CREBBP
1:31731076|31733586	Tissue-Specific	Lung	exon	TXNRD1
AEMK02000452.1:2189903|2198176	Tissue-Specific	Lung	exon	ZC3H18
2:144449817|144485328	Tissue-Specific	Lung	exon	GNB1
17:44179830|44180350	Tissue-Specific	Lung	exon	BRD2
10:53144969|53149101	Tissue-Specific	Lung	exon	ANKS1A
13:199953987|199958845	Tissue-Specific	Lung	exon	DENND5A
9:46486910|46487508	Tissue-Specific	Lung	intergenic_region	nan
13:18898335|18923106	Tissue-Specific	Lung	exon	nan
4:88953659|88953913	Tissue-Specific	Lung	exon	nan
7:30898715|30902633	Tissue-Specific	Lung	exon	nan
8:27943362|27944426	Tissue-Specific	Lung	exon	PGS1
3:32081242|32098436	Tissue-Specific	Lung	exon	GPRC5A
13:206585370|206595340	Tissue-Specific	Lung	exon	PLXND1
7:98745664|98759496	Tissue-Specific	Lung	exon	BRWD3
13:78890056|78894685	Tissue-Specific	Lung	exon	ARHGAP26
5:83252820|83291130	Tissue-Specific	Ovary	exon	UTRN
5:83252820|83257730	Tissue-Specific	Ovary	exon	HUS1
9:32266027|32287538	Tissue-Specific	Ovary	exon	GFPT1
7:56111793|56122384	Tissue-Specific	Ovary	exon	RGS22
5:83270762|83291130	Tissue-Specific	Ovary	exon	RGS22
9:40083609|40088267	Tissue-Specific	Ovary	exon	TC2N
5:83073859|83081749	Tissue-Specific	Ovary	intergenic_region	nan
15:48381596|48382047	Tissue-Specific	Ovary	exon	BNC2
4:122275847|122298199	Tissue-Specific	Ovary	exon	ADAM12
18:25678787|25679887	Tissue-Specific	Ovary	exon	SLC30A5
9:40085035|40088267	Tissue-Specific	Ovary	exon	TC2N
5:83201512|83270866	Tissue-Specific	Ovary	intergenic_region	nan
14:28350741|28373135	Tissue-Specific	Ovary	exon	BICC1
5:83201512|83291130	Tissue-Specific	Ovary	exon	PHLPP2
10:65563759|65568498	Tissue-Specific	Ovary	exon	CPED1
14:28350741|28366844	Tissue-Specific	Ovary	exon	COL14A1
1:14416335|14476051	Tissue-Specific	Ovary	intron	ESR1
5:83215501|83291130	Tissue-Specific	Ovary	exon	SMAD2
13:151200864|151265264	Tissue-Specific	Ovary	exon	SYNE2
8:41441331|41459287	Tissue-Specific	Ovary	exon	CALD1
3:125140292|125141259	Tissue-Specific	Ovary	exon	GREB1L
6:106566592|106593940	Tissue-Specific	Ovary	exon	SVEP1
10:22742781|22812591	Tissue-Specific	Ovary	exon	RHOT1
5:83201512|83257730	Tissue-Specific	Ovary	exon	ULK2
1:113972968|113989630	Tissue-Specific	Ovary	exon	MITF
15:54610048|54650416	Tissue-Specific	Ovary	intergenic_region	nan
11:47594177|47628837	Tissue-Specific	Ovary	exon	FAM20B
3:106471681|106499262	Tissue-Specific	Ovary	exon	UTRN
1:113987110|113989630	Tissue-Specific	Ovary	exon	ASAP2
1:206068176|206114157	Tissue-Specific	Ovary	exon	PRKD1
6:106551428|106575060	Tissue-Specific	Ovary	exon	COL12A1
7:40205928|40222732	Tissue-Specific	Ovary	exon	VPS13B
10:17467676|17468635	Tissue-Specific	Ovary	exon	GREB1L
2:101598666|101611857	Tissue-Specific	Ovary	exon	UTRN
6:106566592|106575060	Tissue-Specific	Ovary	exon	GREB1L
18:14273254|14294865	Tissue-Specific	Ovary	exon	MYOF
5:83252820|83270863	Tissue-Specific	Ovary	exon	RBPMS
14:135417360|135449718	Tissue-Specific	Ovary	exon	RGS22
17:1547525|1561416	Tissue-Specific	Ovary	exon	TMEM245
13:46456278|46478907	Tissue-Specific	Ovary	exon	NR5A2
9:40083609|40088107	Tissue-Specific	Ovary	intron	PARD3B
17:46489470|46524599	Tissue-Specific	Ovary	exon	PLEKHH2
4:36919461|36943960	Tissue-Specific	Ovary	exon	RGS22
1:251470004|251482425	Tissue-Specific	Ovary	intron	nan
15:125773918|125777791	Tissue-Specific	Ovary	exon	OCRL
9:10212402|10301245	Tissue-Specific	Ovary	intron	ESR1
1:97447508|97484275	Tissue-Specific	Ovary	exon	NSUN6
1:13859888|13884314	Tissue-Specific	Ovary	exon	DCBLD2
12:42741473|42758003	Tissue-Specific	Ovary	exon	KIF16B
7:113349922|113371752	Tissue-Specific	Ovary	exon	ZC3H6
4:36919461|36972557	Tissue-Specific	Ovary	intron	ZFPM2
1:20869922|20876823	Tissue-Specific	Ovary	intergenic_region	nan
13:51386726|51401694	Tissue-Specific	Ovary	exon	SNX14
4:36919461|36957899	Tissue-Specific	Ovary	exon	ITPR1
16:47311759|47318175	Tissue-Specific	Ovary	exon	TLCD4
3:126983403|126992124	Tissue-Specific	Ovary	exon	MACF1
X:61701949|61728597	Tissue-Specific	Ovary	exon	SLC36A4
15:108019406|108023512	Tissue-Specific	Ovary	exon	ZDHHC20
8:104385993|104402278	Tissue-Specific	Ovary	exon	PAPSS2
5:83215501|83270866	Tissue-Specific	Ovary	exon	LIMA1
1:14456953|14476051	Tissue-Specific	Ovary	exon	LMBR1
1:251444061|251449764	Tissue-Specific	Ovary	exon	GREB1L
6:106683606|106685941	Tissue-Specific	Ovary	exon	KIT
17:43753913|43777920	Tissue-Specific	Ovary	exon	TLCD4
4:36969987|36972557	Tissue-Specific	Ovary	exon	KIF1B
9:32266027|32306859	Tissue-Specific	Ovary	exon	FBXO22
9:25668011|25674400	Tissue-Specific	Ovary	exon	ATRX
13:160079720|160117681	Tissue-Specific	Ovary	exon	SCARB1
14:109897301|109900759	Tissue-Specific	Ovary	exon	FNDC3B
14:62087320|62104376	Tissue-Specific	Ovary	exon	SCN9A
4:36903221|36919682	Tissue-Specific	Ovary	exon	DLC1
10:39159520|39160458	Tissue-Specific	Ovary	exon	SVEP1
5:83215501|83257730	Tissue-Specific	Ovary	exon	TOP1
4:122253260|122298199	Tissue-Specific	Ovary	intergenic_region	nan
7:71368885|71405143	Tissue-Specific	Ovary	exon	SEMA5A
14:104811485|104813682	Tissue-Specific	Ovary	exon	DLC1
4:85892566|85906932	Tissue-Specific	Ovary	exon	PDE5A
9:78406075|78487349	Tissue-Specific	Ovary	exon	SMARCA1
6:17315379|17356850	Tissue-Specific	Ovary	exon	INTS6L
4:31972148|32071027	Tissue-Specific	Ovary	exon	BMPR1B
1:20776417|20784622	Tissue-Specific	Ovary	exon	SMARCA2
5:83106685|83123332	Tissue-Specific	Ovary	exon	COMMD6
8:124560982|124594106	Tissue-Specific	Ovary	exon	UTRN
3:73046115|73062667	Tissue-Specific	Ovary	exon	FAM13B
4:37000119|37026970	Tissue-Specific	Ovary	exon	HIF1A
3:125151893|125155386	Tissue-Specific	Ovary	exon	ANO4
1:14373232|14457143	Tissue-Specific	Ovary	exon	ANO4
13:110835616|110853978	Tissue-Specific	Ovary	exon	ANO4
10:10799234|10818538	Tissue-Specific	Ovary	intergenic_region	nan
3:106386726|106443851	Tissue-Specific	Ovary	exon	SVEP1
15:72760024|72762094	Tissue-Specific	Ovary	exon	ADAM7
1:250150186|250171078	Tissue-Specific	Ovary	exon	HPSE2
X:106171069|106172488	Tissue-Specific	Ovary	exon	RGS22
4:37366367|37383210	Tissue-Specific	Ovary	exon	NFAT5
4:18795587|18815854	Tissue-Specific	Ovary	exon	ALDH1A2
14:8462790|8464542	Tissue-Specific	Ovary	exon	MKX
13:61221735|61228411	Tissue-Specific	Ovary	intron	HHLA2
18:54024929|54040690	Tissue-Specific	Ovary	exon	SCARB1
6:100556007|100604214	Tissue-Specific	Ovary	exon	CCNJ
1:219625602|219661659	Tissue-Specific	Ovary	exon	STAR
6:92505335|92507400	Tissue-Specific	Ovary	exon	SERPINE2
17:1547525|1548672	Tissue-Specific	Ovary	exon	TOX2
4:33478521|33494115	Tissue-Specific	Ovary	intron	SUGCT
4:37013328|37026970	Tissue-Specific	Ovary	exon	MCTP1
18:23914587|24011139	Tissue-Specific	Ovary	exon	GREB1
1:14387851|14457143	Tissue-Specific	Ovary	intron	RIMS2
10:20508015|20536074	Tissue-Specific	Ovary	exon	RGS22
1:20873894|20886741	Tissue-Specific	Ovary	exon	ANO4
6:14670096|14678710	Tissue-Specific	Ovary	exon	ANO4
7:113349922|113358807	Tissue-Specific	Ovary	exon	ANO4
12:59821853|59839936	Tissue-Specific	Ovary	exon	ANO4
1:20908952|20917634	Tissue-Specific	Ovary	exon	ANO4
14:107459602|107473522	Tissue-Specific	Ovary	exon	ANO4
3:96717340|96752113	Tissue-Specific	Ovary	exon	ANO4
9:120823073|120834752	Tissue-Specific	Ovary	exon	ANO4
1:90822121|90832324	Tissue-Specific	Ovary	exon	GREB1L
18:1850543|1881411	Tissue-Specific	Ovary	intergenic_region	nan
17:25109949|25124335	Tissue-Specific	Ovary	intergenic_region	nan
1:194173863|194179870	Tissue-Specific	Ovary	exon	nan
1:190665201|190666540	Tissue-Specific	Ovary	intron	ESR1
6:70578482|70586855	Tissue-Specific	Ovary	intron	ESR1
18:48525973|48538181	Tissue-Specific	Ovary	exon	ALDH1A2
10:44916928|44947188	Tissue-Specific	Ovary	exon	DENND1B
6:95091551|95114096	Tissue-Specific	Ovary	exon	TRDMT1
X:111039680|111065631	Tissue-Specific	Ovary	intergenic_region	nan
11:1364578|1376231	Tissue-Specific	Ovary	exon	SPHKAP
16:72985021|73039920	Tissue-Specific	Ovary	exon	SLC13A1
5:16100020|16116324	Tissue-Specific	Ovary	exon	LTBP1
X:106092152|106103383	Tissue-Specific	Ovary	exon	LTBP1
7:69805626|69828037	Tissue-Specific	Ovary	exon	GREB1
3:44095481|44122061	Tissue-Specific	Ovary	exon	RGS22
14:99771461|99786874	Tissue-Specific	Ovary	exon	RGS22
1:54474921|54494313	Tissue-Specific	Ovary	exon	PBX1
9:131742920|131766259	Tissue-Specific	Ovary	exon	FAM102B
1:251436262|251460641	Tissue-Specific	Ovary	exon	ANO4
15:129337332|129341112	Tissue-Specific	Ovary	exon	OSCP1
4:111415063|111433006	Tissue-Specific	Ovary	exon	ARHGAP28
2:139982435|140023167	Tissue-Specific	Ovary	exon	RUNX2
5:101839378|101842266	Tissue-Specific	Ovary	intergenic_region	nan
6:106551428|106593940	Tissue-Specific	Ovary	exon	UVRAG
4:36955117|36957899	Tissue-Specific	Ovary	intergenic_region	nan
10:43443984|43493757	Tissue-Specific	Ovary	exon	ICA1
X:115221683|115223307	Tissue-Specific	Pituitary	exon	WDR27
1:45983810|45987127	Tissue-Specific	Pituitary	exon	WDR27
3:89905487|89909971	Tissue-Specific	Pituitary	exon	MAP3K4
X:115221683|115281414	Tissue-Specific	Pituitary	exon	DOP1A
4:33087513|33133416	Tissue-Specific	Pituitary	exon	MYO6
4:33087513|33173673	Tissue-Specific	Pituitary	exon	EIF2AK4
4:19360870|19409091	Tissue-Specific	Pituitary	exon	ERMP1
3:86297988|86298417	Tissue-Specific	Pituitary	exon	TRPM3
9:97358654|97395894	Tissue-Specific	Pituitary	exon	FH
1:252346468|252349640	Tissue-Specific	Pituitary	exon	NF1
10:6282308|6284532	Tissue-Specific	Pituitary	exon	CPD
11:69103631|69131726	Tissue-Specific	Pituitary	exon	MAGI1
4:15288794|15303961	Tissue-Specific	Pituitary	exon	KLHL24
X:91166764|91194084	Tissue-Specific	Pituitary	exon	LSAMP
4:33087513|33173670	Tissue-Specific	Pituitary	exon	USP16
1:224085228|224120896	Tissue-Specific	Pituitary	exon	MPHOSPH9
15:80851797|80878499	Tissue-Specific	Pituitary	exon	ATXN2
17:3352393|3399856	Tissue-Specific	Pituitary	exon	ERCC6
AEMK02000698.1:2296472|2329880	Tissue-Specific	Pituitary	exon	ERBIN
1:49303510|49331483	Tissue-Specific	Pituitary	exon	PLCB1
15:52770700|52791642	Tissue-Specific	Pituitary	exon	PLCB1
4:33263081|33292751	Tissue-Specific	Pituitary	exon	DGKI
11:69962650|70001752	Tissue-Specific	Pituitary	exon	SLC13A1
6:117942103|117975017	Tissue-Specific	Pituitary	exon	FAM169A
1:223974592|224043756	Tissue-Specific	Pituitary	exon	SLC27A6
3:84470036|84482961	Tissue-Specific	Pituitary	exon	EML6
9:2587898|2600243	Tissue-Specific	Pituitary	exon	PREPL
15:74668450|74690511	Tissue-Specific	Pituitary	intergenic_region	nan
12:12440497|12495369	Tissue-Specific	Pituitary	exon	NBAS
17:3352393|3424855	Tissue-Specific	Pituitary	exon	ZBTB10
1:18712395|18764492	Tissue-Specific	Pituitary	exon	CCT3
15:52773269|52791642	Tissue-Specific	Pituitary	exon	PPHLN1
4:78644035|78661386	Tissue-Specific	Pituitary	exon	TMTC2
1:224019855|224043756	Tissue-Specific	Pituitary	exon	METTL25
1:180354440|180375104	Tissue-Specific	Pituitary	exon	ESCO1
9:91925246|91935497	Tissue-Specific	Pituitary	exon	nan
11:69776125|69794145	Tissue-Specific	Pituitary	exon	TBC1D19
13:37836200|37904450	Tissue-Specific	Pituitary	exon	ADGRL3
15:115825432|115867040	Tissue-Specific	Pituitary	exon	SPATA5
1:53397627|53440883	Tissue-Specific	Pituitary	exon	PRRC2C
11:70372321|70378964	Tissue-Specific	Pituitary	intergenic_region	nan
15:52781881|52791642	Tissue-Specific	Pituitary	exon	PDE10A
6:147861878|147923231	Tissue-Specific	Pituitary	exon	FIG4
4:81568296|81577916	Tissue-Specific	Pituitary	exon	REV3L
12:47400191|47409801	Tissue-Specific	Pituitary	exon	PIAS2
9:84105161|84119222	Tissue-Specific	Pituitary	exon	PIAS2
13:44019972|44069587	Tissue-Specific	Pituitary	exon	PIGN
8:105307679|105357304	Tissue-Specific	Pituitary	exon	TRPM3
14:21927692|21996843	Tissue-Specific	Pituitary	exon	ZNF483
7:114806313|114833365	Tissue-Specific	Pituitary	exon	KIAA1958
4:119180412|119229594	Tissue-Specific	Pituitary	exon	UPF2
2:137892610|137907959	Tissue-Specific	Pituitary	exon	TANC2
9:106868358|106873921	Tissue-Specific	Pituitary	exon	NAALADL2
13:193034630|193049824	Tissue-Specific	Pituitary	exon	DYRK1A
9:92602466|92625609	Tissue-Specific	Pituitary	exon	NEK1
2:67883951|67886169	Tissue-Specific	Pituitary	exon	MPHOSPH9
2:83881770|83904383	Tissue-Specific	Pituitary	exon	UGGT1
3:48893039|48899041	Tissue-Specific	Pituitary	exon	WDR75
4:64223154|64277903	Tissue-Specific	Pituitary	exon	RNF145
X:67336836|67379977	Tissue-Specific	Pituitary	exon	nan
13:107080757|107100512	Tissue-Specific	Pituitary	exon	LMBR1
3:84476843|84482961	Tissue-Specific	Pituitary	exon	DOCK4
2:111217997|111231963	Tissue-Specific	Pituitary	exon	PRMT3
4:81571951|81577916	Tissue-Specific	Pituitary	exon	NSD1
1:116400801|116427156	Tissue-Specific	Pituitary	exon	MSH3
12:31337521|31362356	Tissue-Specific	Pituitary	exon	EPB41L4A
10:33610154|33692048	Tissue-Specific	Pituitary	exon	USP34
5:41938993|41949095	Tissue-Specific	Pituitary	exon	NOL10
16:12145286|12148085	Tissue-Specific	Pituitary	exon	PTK2
1:213867511|213896869	Tissue-Specific	Pituitary	exon	ZFHX4
1:163711711|163758473	Tissue-Specific	Pituitary	exon	CCDC181
AEMK02000698.1:2296472|2300603	Tissue-Specific	Pituitary	exon	CDC14A
16:73967882|73970434	Tissue-Specific	Pituitary	exon	GBP2
8:65464351|65477030	Tissue-Specific	Pituitary	exon	FAM227A
13:59464649|59500622	Tissue-Specific	Pituitary	exon	nan
5:38584761|38597159	Tissue-Specific	Pituitary	exon	KCNC2
15:43954590|43979481	Tissue-Specific	Pituitary	exon	ERC1
9:32655059|32684041	Tissue-Specific	Pituitary	exon	ERC1
4:6355929|6392035	Tissue-Specific	Pituitary	intergenic_region	nan
8:43586874|43588226	Tissue-Specific	Pituitary	exon	CCSER1
5:76443416|76473741	Tissue-Specific	Pituitary	exon	PPP1R9A
7:87580681|87583713	Tissue-Specific	Pituitary	exon	RSBN1L
2:38950389|39012138	Tissue-Specific	Pituitary	exon	BRWD3
11:69982436|70001752	Tissue-Specific	Pituitary	exon	PIAS1
1:202188216|202228210	Tissue-Specific	Pituitary	exon	ELAVL2
4:106856345|106878741	Tissue-Specific	Pituitary	exon	NBEA
18:18334031|18342433	Tissue-Specific	Pituitary	exon	NPEPPS
4:81568296|81572904	Tissue-Specific	Pituitary	exon	MED13
AEMK02000682.1:1036980|1040665	Tissue-Specific	Pituitary	exon	BICC1
16:73967882|73974822	Tissue-Specific	Pituitary	exon	LRP1B
8:109492834|109518213	Tissue-Specific	Pituitary	exon	EPB41L5
9:92602466|92654454	Tissue-Specific	Pituitary	exon	BAZ2B
3:113309399|113363181	Tissue-Specific	Pituitary	exon	BAZ2B
5:38335558|38338690	Tissue-Specific	Pituitary	exon	ATF2
5:17084538|17090924	Tissue-Specific	Pituitary	exon	ABI2
16:45570683|45604874	Tissue-Specific	Pituitary	exon	RNF216
5:86152812|86211231	Tissue-Specific	Pituitary	exon	ALMS1
10:6497063|6525863	Tissue-Specific	Pituitary	exon	PPP1R21
14:30765780|30772037	Tissue-Specific	Pituitary	intergenic_region	nan
2:83861214|83876025	Tissue-Specific	Pituitary	exon	MON2
1:218480058|218542703	Tissue-Specific	Pituitary	exon	KDM1A
5:70934542|70958688	Tissue-Specific	Pituitary	exon	SPIRE1
13:44052898|44085462	Tissue-Specific	Pituitary	exon	ASXL3
13:208153446|208156323	Tissue-Specific	Pituitary	exon	SLIT2
15:74631515|74673181	Tissue-Specific	Pituitary	intron	MTHFD2L
14:34839248|34839761	Tissue-Specific	Pituitary	intron	DNAAF4
3:86307976|86331936	Tissue-Specific	Pituitary	exon	FOCAD
2:83875260|83904383	Tissue-Specific	Pituitary	intergenic_region	nan
4:33234422|33271113	Tissue-Specific	Pituitary	exon	ERCC6L2
15:112346508|112382467	Tissue-Specific	Pituitary	exon	nan
13:139309728|139335327	Tissue-Specific	Pituitary	exon	NBEA
4:42331029|42345093	Tissue-Specific	Pituitary	exon	STXBP4
8:106645248|106698980	Tissue-Specific	Pituitary	exon	KCNH8
4:30117542|30174417	Tissue-Specific	Pituitary	exon	TRPC1
10:20423359|20455885	Tissue-Specific	Pituitary	exon	NCAM2
10:6525770|6531624	Tissue-Specific	Pituitary	exon	JMJD1C
6:100939574|100955160	Tissue-Specific	Pituitary	exon	CNTNAP5
9:92065471|92090084	Tissue-Specific	Pituitary	exon	TENM3
5:13687857|13732003	Tissue-Specific	Pituitary	exon	PIGU
1:82587980|82624100	Tissue-Specific	Pituitary	exon	RNF32
2:83870336|83904383	Tissue-Specific	Pituitary	intergenic_region	nan
6:129756751|129782346	Tissue-Specific	Pituitary	exon	NSD1
6:117367134|117405373	Tissue-Specific	Pituitary	exon	EPB41L4A
9:97468566|97506201	Tissue-Specific	Pituitary	exon	GCFC2
12:44486691|44535333	Tissue-Specific	Pituitary	exon	STRN
9:36437190|36456435	Tissue-Specific	Pituitary	exon	MBOAT2
5:17069692|17090924	Tissue-Specific	Pituitary	exon	WASHC5
2:87254645|87286479	Tissue-Specific	Pituitary	exon	RUNX1T1
8:60674068|60681207	Tissue-Specific	Pituitary	exon	GDAP2
6:165355054|165380419	Tissue-Specific	Pituitary	exon	KCNC2
13:204174276|204190561	Tissue-Specific	Pituitary	exon	KCNC2
14:88896778|88909499	Tissue-Specific	Pituitary	exon	CAPS2
2:97775483|97790641	Tissue-Specific	Pituitary	intergenic_region	nan
9:132959193|132966235	Tissue-Specific	Pituitary	exon	ATG4C
15:47017102|47024464	Tissue-Specific	Pituitary	exon	ZSWIM5
2:131761608|131772491	Tissue-Specific	Pituitary	exon	nan
5:30859944|30880496	Tissue-Specific	Pituitary	exon	EML5
10:30329693|30362299	Tissue-Specific	Pituitary	exon	DICER1
7:98955045|98979240	Tissue-Specific	Pituitary	exon	PHF14
12:47400191|47440426	Tissue-Specific	Pituitary	exon	MBD2
X:47014333|47068948	Tissue-Specific	Pituitary	exon	FOCAD
1:131562777|131585593	Tissue-Specific	Pituitary	exon	RPH3AL
3:48610615|48643634	Tissue-Specific	Pituitary	exon	SLK
1:5181124|5207101	Tissue-Specific	Pituitary	exon	nan
3:110128254|110175065	Tissue-Specific	Pituitary	exon	CCDC181
AEMK02000682.1:192445|196005	Tissue-Specific	Pituitary	exon	PTBP2
13:39095610|39108410	Tissue-Specific	Pituitary	exon	nan
2:111217997|111247363	Tissue-Specific	Pituitary	exon	CMTM4
8:111743807|111829302	Tissue-Specific	Pituitary	intron	ASXL3
7:95022820|95024620	Tissue-Specific	Pituitary	exon	SIPA1L1
X:36792047|36818934	Tissue-Specific	Pituitary	exon	ANKRD42
8:31853223|31900809	Tissue-Specific	Pituitary	intron	DLG2
2:83861214|83870486	Tissue-Specific	Pituitary	exon	PEX1
7:114805379|114833365	Tissue-Specific	Pituitary	exon	CCDC170
11:69998310|70001752	Tissue-Specific	Pituitary	exon	nan
7:121751648|121786686	Tissue-Specific	Pituitary	exon	BCAS3
6:117942103|117985168	Tissue-Specific	Pituitary	exon	UBN2
13:201043326|201121879	Tissue-Specific	Pituitary	exon	AOAH
3:86391854|86408973	Tissue-Specific	Pituitary	exon	RASA1
9:114937099|114969497	Tissue-Specific	Pituitary	exon	ALMS1
1:82552806|82594233	Tissue-Specific	Pituitary	exon	DHX57
1:17372568|17416764	Tissue-Specific	Pituitary	exon	BTBD8
15:112586097|112600022	Tissue-Specific	Pituitary	intergenic_region	nan
13:44052898|44066072	Tissue-Specific	Pituitary	exon	N4BP2
9:135968662|135969383	Tissue-Specific	Pituitary	exon	PPP3CA
1:194996953|195031622	Tissue-Specific	Pituitary	exon	PAK3
4:110912190|110914372	Tissue-Specific	Pituitary	exon	FREM1
5:38337763|38338690	Tissue-Specific	Pituitary	exon	FREM1
3:113272703|113363181	Tissue-Specific	Pituitary	exon	ZNF462
4:28981119|29047618	Tissue-Specific	Pituitary	exon	NBEA
3:92045274|92078198	Tissue-Specific	Pituitary	exon	TANC2
4:33234422|33292751	Tissue-Specific	Pituitary	exon	ERC2
1:165996063|166037819	Tissue-Specific	Pituitary	exon	CHL1
14:57531792|57533544	Tissue-Specific	Pituitary	exon	CHL1
13:44019972|44085462	Tissue-Specific	Pituitary	exon	SIRT1
5:42740180|42797088	Tissue-Specific	Pituitary	exon	PRLR
5:34040835|34047071	Tissue-Specific	Pituitary	exon	BBS9
7:110647733|110674884	Tissue-Specific	Pituitary	exon	EPB41L4A
10:49890048|49958985	Tissue-Specific	Pituitary	exon	PDCL3
6:117367134|117444584	Tissue-Specific	Pituitary	exon	N4BP2
18:40140465|40175473	Tissue-Specific	Pituitary	exon	DGKB
8:27898443|27944426	Tissue-Specific	Pituitary	exon	nan
2:97787994|97789778	Tissue-Specific	Pituitary	exon	SNX14
6:159908971|159953975	Tissue-Specific	Pituitary	exon	RTTN
15:71964051|71984239	Tissue-Specific	Pituitary	exon	ATL1
15:71759569|71783061	Tissue-Specific	Pituitary	intergenic_region	nan
1:136848050|136864552	Tissue-Specific	Pituitary	exon	ARHGAP21
4:78633236|78661386	Tissue-Specific	Pituitary	exon	SHQ1
1:180354440|180364159	Tissue-Specific	Pituitary	exon	ZNF395
16:61501656|61513746	Tissue-Specific	Pituitary	intergenic_region	nan
11:11248377|11266949	Tissue-Specific	Pituitary	exon	OGA
7:98242045|98245392	Tissue-Specific	Pituitary	exon	LRP1B
10:18449413|18463778	Tissue-Specific	Pituitary	exon	CDH10
6:61477367|61480962	Tissue-Specific	Pituitary	exon	DZANK1
1:86675333|86679894	Tissue-Specific	Pituitary	intergenic_region	nan
10:50350337|50386113	Tissue-Specific	Pituitary	exon	SLF1
5:93012763|93037172	Tissue-Specific	Pituitary	exon	TTC37
8:70193530|70233887	Tissue-Specific	Pituitary	exon	UNC79
8:105286131|105314745	Tissue-Specific	Pituitary	exon	NDST3
X:87082734|87091944	Tissue-Specific	Pituitary	exon	USP9X
2:29400018|29460724	Tissue-Specific	Pituitary	exon	UNC13B
13:192897020|192938006	Tissue-Specific	Pituitary	exon	USP25
1:82587980|82617676	Tissue-Specific	Pituitary	exon	MRTFB
1:218480058|218573173	Tissue-Specific	Pituitary	exon	ARFGEF1
15:65167296|65169612	Tissue-Specific	Pituitary	exon	nan
1:123644822|123656507	Tissue-Specific	Pituitary	exon	LCORL
13:56992010|57007489	Tissue-Specific	Pituitary	exon	CPE
12:12704689|12748564	Tissue-Specific	Pituitary	exon	CEP126
1:41135588|41180922	Tissue-Specific	Pituitary	exon	ARCN1
4:106953072|106963143	Tissue-Specific	Pituitary	exon	CACNA1B
14:25351389|25352280	Tissue-Specific	Pituitary	exon	SENP6
4:106845342|106875262	Tissue-Specific	Pituitary	exon	ARHGAP21
8:132670606|132709741	Tissue-Specific	Pituitary	exon	FNDC3A
13:139127460|139129715	Tissue-Specific	Pituitary	exon	CEP112
14:35525541|35550644	Tissue-Specific	Pituitary	exon	NF1
15:114194690|114226716	Tissue-Specific	Pituitary	exon	TCAIM
1:54462732|54494313	Tissue-Specific	Pituitary	exon	SNX25
6:145693885|145725523	Tissue-Specific	Pituitary	exon	MEST
14:6754236|6771753	Tissue-Specific	Pituitary	exon	LMTK2
4:33087513|33133297	Tissue-Specific	Pituitary	exon	EPCAM
13:185464378|185477500	Tissue-Specific	Pituitary	exon	nan
5:53620694|53669181	Tissue-Specific	Pituitary	exon	TMEM62
5:38328843|38338690	Tissue-Specific	Pituitary	exon	MYO9A
17:146932|184314	Tissue-Specific	Pituitary	exon	GPR107
4:59548289|59552301	Tissue-Specific	Pituitary	intron	VPS8
3:80721987|80729963	Tissue-Specific	Pituitary	exon	SLC39A14
15:115825432|115856304	Tissue-Specific	Pituitary	exon	SNAP47
1:166036953|166073595	Tissue-Specific	Pituitary	exon	ALMS1
10:19174308|19181256	Tissue-Specific	Pituitary	exon	GLMN
7:90751454|90848269	Tissue-Specific	Pituitary	exon	ERC1
5:99299351|99335687	Tissue-Specific	Pituitary	exon	nan
6:129756751|129787724	Tissue-Specific	Pituitary	exon	SPIRE1
6:97085793|97095194	Tissue-Specific	Pituitary	intron	ASXL3
1:86633336|86679894	Tissue-Specific	Pituitary	intron	TTLL5
6:100902050|100955160	Tissue-Specific	Pituitary	exon	EML5
8:128718651|128802554	Tissue-Specific	Pituitary	exon	RAP1GDS1
11:8608726|8619754	Tissue-Specific	Pituitary	intron	SWT1
4:78615423|78633366	Tissue-Specific	Pituitary	exon	FMN1
3:90315002|90381579	Tissue-Specific	Pituitary	exon	FOCAD
5:84255136|84282662	Tissue-Specific	Pituitary	intergenic_region	nan
11:79119888|79135466	Tissue-Specific	Pituitary	intron	KCNMA1
13:56945601|56955906	Tissue-Specific	Pituitary	exon	CCSER2
X:115168541|115184660	Tissue-Specific	Pituitary	intron	ARMC9
4:78625040|78638825	Tissue-Specific	Pituitary	exon	MTREX
1:131523686|131539474	Tissue-Specific	Pituitary	exon	TUSC3
2:148884280|148889499	Tissue-Specific	Pituitary	exon	nan
8:33594377|33603766	Tissue-Specific	Pituitary	exon	LARS1
15:78822692|78844260	Tissue-Specific	Pituitary	exon	ADCY9
10:14807079|14850824	Tissue-Specific	Pituitary	intron	ASH1L
2:38489637|38526752	Tissue-Specific	Pituitary	exon	LARP4
6:142567860|142602446	Tissue-Specific	Pituitary	exon	DENND5B
9:84006950|84053693	Tissue-Specific	Pituitary	exon	TAF4B
13:177427169|177474540	Tissue-Specific	Pituitary	exon	NFIA
4:77414568|77414920	Tissue-Specific	Pituitary	exon	ZFYVE9
1:253957057|253959670	Tissue-Specific	Pituitary	exon	TTLL5
13:44019972|44066072	Tissue-Specific	Pituitary	exon	MAML3
4:2771954|2793098	Tissue-Specific	Pituitary	exon	NAA15
8:52798820|52810529	Tissue-Specific	Pituitary	intergenic_region	nan
10:14841617|14859342	Tissue-Specific	Pituitary	exon	PTPN13
11:69105921|69131726	Tissue-Specific	Pituitary	exon	WDFY3
6:168856047|168858413	Tissue-Specific	Pituitary	exon	ATM
8:132709617|132735346	Tissue-Specific	Pituitary	exon	SRPK2
8:43600697|43602937	Tissue-Specific	Pituitary	exon	RADX
12:15516933|15533172	Tissue-Specific	Pituitary	exon	CNST
1:43044715|43052940	Tissue-Specific	Pituitary	exon	PAN3
13:44052898|44078921	Tissue-Specific	Pituitary	exon	nan
8:97147577|97167532	Tissue-Specific	Pituitary	exon	BRIP1
2:127051486|127061723	Tissue-Specific	Pituitary	exon	SLC6A20
5:70912623|70915410	Tissue-Specific	Pituitary	exon	nan
3:101017984|101028254	Tissue-Specific	Pituitary	exon	KIAA0825
14:42306563|42314121	Tissue-Specific	Pituitary	exon	MAN2A1
13:56972791|56994144	Tissue-Specific	Pituitary	exon	PSME4
14:103704916|103786075	Tissue-Specific	Pituitary	exon	KIAA0319L
11:3661281|3749738	Tissue-Specific	Pituitary	exon	PATJ
5:48889600|48911418	Tissue-Specific	Pituitary	exon	SPATA6
16:45565816|45654291	Tissue-Specific	Pituitary	exon	nan
1:224099715|224120896	Tissue-Specific	Pituitary	exon	nan
1:26190240|26213310	Tissue-Specific	Pituitary	exon	PCLO
13:56972791|56978103	Tissue-Specific	Pituitary	exon	PHIP
3:29095384|29159086	Tissue-Specific	Pituitary	exon	DPP8
18:2071157|2075283	Tissue-Specific	Pituitary	exon	PTPRD
17:130250|184314	Tissue-Specific	Pituitary	exon	MTPAP
9:22420149|22421016	Tissue-Specific	Pituitary	exon	APPL1
8:15073623|15125114	Tissue-Specific	Pituitary	exon	STK39
16:29763897|29768001	Tissue-Specific	Pituitary	exon	STK39
15:71728433|71747256	Tissue-Specific	Pituitary	exon	BICD1
1:202015755|202048390	Tissue-Specific	Pituitary	exon	ITPR2
6:117367134|117422285	Tissue-Specific	Pituitary	exon	ASXL3
7:110647733|110657530	Tissue-Specific	Pituitary	exon	SEC31A
3:92210007|92217167	Tissue-Specific	Pituitary	exon	PCLO
5:86824132|86871691	Tissue-Specific	Pituitary	exon	KMT2E
9:33913327|33927179	Tissue-Specific	Pituitary	exon	REV3L
1:194996953|195024592	Tissue-Specific	Pituitary	exon	DYM
14:57587192|57597630	Tissue-Specific	Pituitary	intergenic_region	nan
15:10866239|10880893	Tissue-Specific	Pituitary	exon	nan
1:38465240|38563520	Tissue-Specific	Pituitary	exon	SMARCC1
1:77254058|77279692	Tissue-Specific	Pituitary	exon	USP37
13:6431373|6454903	Tissue-Specific	Pituitary	exon	FAM169A
15:38289380|38305409	Tissue-Specific	Pituitary	exon	nan
1:80078290|80136352	Tissue-Specific	Pituitary	intergenic_region	nan
15:106316491|106348475	Tissue-Specific	Pituitary	exon	PTK2
14:103750603|103786075	Tissue-Specific	Pituitary	intron	CPSF6
14:120006180|120016435	Tissue-Specific	Pituitary	exon	C12orf4
15:74640065|74690511	Tissue-Specific	Pituitary	exon	METTL25
4:124925939|124932739	Tissue-Specific	Pituitary	exon	EPB41
17:32064063|32091714	Tissue-Specific	Pituitary	exon	SRP54
9:74879761|74896681	Tissue-Specific	Pituitary	exon	TMEM184C
15:95531539|95562038	Tissue-Specific	Pituitary	exon	PCNX4
9:132886133|132966235	Tissue-Specific	Pituitary	exon	FOCAD
6:58280940|58287583	Tissue-Specific	Pituitary	exon	CDC42BPA
1:28572083|28619858	Tissue-Specific	Pituitary	exon	NDUFB6
2:97775483|97811265	Tissue-Specific	Pituitary	exon	PIBF1
6:27324852|27332600	Tissue-Specific	Pituitary	exon	DYRK1A
2:38950389|39019068	Tissue-Specific	Pituitary	exon	GLS
5:17118708|17124399	Tissue-Specific	Pituitary	intron	nan
7:110550360|110556001	Tissue-Specific	Pituitary	exon	EMC2
13:121240538|121266554	Tissue-Specific	Pituitary	exon	nan
11:69962650|69984549	Tissue-Specific	Pituitary	exon	CHD8
1:96453516|96465249	Tissue-Specific	Pituitary	exon	EML5
1:102571848|102574753	Tissue-Specific	Pituitary	exon	KATNAL2
13:24543515|24549947	Tissue-Specific	Pituitary	exon	KANK1
4:117692410|117775497	Tissue-Specific	Pituitary	exon	USP12
6:100951443|100956355	Tissue-Specific	Pituitary	exon	NBEA
13:117918914|117933962	Tissue-Specific	Pituitary	exon	GRIK1
X:94542281|94559701	Tissue-Specific	Pituitary	exon	CFAP46
13:203339666|203339983	Tissue-Specific	Pituitary	exon	TENM3
2:140023010|140119847	Tissue-Specific	Pituitary	exon	JMY
1:213867511|213878160	Tissue-Specific	Pituitary	exon	CLEC16A
7:94829992|94879720	Tissue-Specific	Pituitary	exon	PREPL
5:13649917|13732003	Tissue-Specific	Pituitary	exon	RXRG
5:85065913|85115204	Tissue-Specific	Pituitary	exon	KIF21A
8:40265853|40276541	Tissue-Specific	Pituitary	exon	NEBL
11:79124046|79125382	Tissue-Specific	Pituitary	exon	FRY
2:97775483|97820015	Tissue-Specific	Pituitary	exon	MAP4
1:202156543|202254632	Tissue-Specific	Pituitary	exon	SLC39A14
9:17645749|17695671	Tissue-Specific	Pituitary	exon	MBD5
9:128489087|128504270	Tissue-Specific	Pituitary	exon	AGAP1
2:83861214|83871440	Tissue-Specific	Pituitary	exon	KHDRBS3
8:119684859|119720021	Tissue-Specific	Pituitary	exon	TMEM65
3:69353541|69390965	Tissue-Specific	Pituitary	exon	ARFGEF1
9:92551617|92590370	Tissue-Specific	Pituitary	intron	AGO1
12:44486691|44543381	Tissue-Specific	Pituitary	intergenic_region	nan
14:57531792|57540169	Tissue-Specific	Pituitary	exon	MLH3
1:207724227|207742743	Tissue-Specific	Pituitary	intergenic_region	nan
9:108169251|108180891	Tissue-Specific	Pituitary	exon	nan
9:97141576|97142970	Tissue-Specific	Pituitary	exon	NEBL
1:235970787|235983215	Tissue-Specific	Pituitary	exon	KLHL24
1:64099220|64136473	Tissue-Specific	Pituitary	exon	ABLIM1
18:51471756|51476842	Tissue-Specific	Pituitary	exon	PHTF1
13:60153143|60161688	Tissue-Specific	Pituitary	exon	FHOD3
1:123607338|123616497	Tissue-Specific	Pituitary	exon	FRMD3
13:139309728|139360522	Tissue-Specific	Pituitary	exon	CACNB2
3:69262709|69317475	Tissue-Specific	Pituitary	exon	RABEP1
2:37201691|37227135	Tissue-Specific	Pituitary	exon	MAST4
1:38492487|38563520	Tissue-Specific	Pituitary	exon	ALMS1
3:101473926|101476500	Tissue-Specific	Pituitary	exon	LMNTD1
13:19401276|19415099	Tissue-Specific	Pituitary	exon	DTNA
16:79924515|79937396	Tissue-Specific	Pituitary	exon	PHF14
13:107484675|107514659	Tissue-Specific	Pituitary	exon	PARD3
8:60173444|60231854	Tissue-Specific	Pituitary	exon	PLCL2
1:161822246|161839209	Tissue-Specific	Pituitary	exon	MIPOL1
1:170070318|170134677	Tissue-Specific	Pituitary	exon	nan
7:64177093|64220950	Tissue-Specific	Pituitary	exon	FCHSD2
4:85335066|85349852	Tissue-Specific	Pituitary	exon	ARFGEF3
AEMK02000598.1:776904|777942	Tissue-Specific	Pituitary	intergenic_region	nan
1:193844214|193856130	Tissue-Specific	Pituitary	exon	SHQ1
1:3314472|3337457	Tissue-Specific	Pituitary	intergenic_region	nan
10:50624808|50631082	Tissue-Specific	Pituitary	exon	R3HDM1
6:120269620|120278201	Tissue-Specific	Pituitary	exon	NADSYN1
18:51454382|51476842	Tissue-Specific	Pituitary	exon	ADGRV1
17:18971972|18974386	Tissue-Specific	Pituitary	intergenic_region	nan
12:12331333|12340337	Tissue-Specific	Pituitary	exon	RALGAPA1
1:26101042|26130322	Tissue-Specific	Pituitary	exon	SLAIN2
14:34756656|34761054	Tissue-Specific	Pituitary	exon	LNX1
1:137118629|137146820	Tissue-Specific	Pituitary	exon	DCLK2
15:112590295|112611219	Tissue-Specific	Pituitary	exon	ATRX
4:124866782|124867484	Tissue-Specific	Pituitary	exon	SENP6
14:114113413|114195297	Tissue-Specific	Pituitary	exon	RELCH
9:131855849|131880686	Tissue-Specific	Pituitary	exon	FOCAD
17:17514572|17564444	Tissue-Specific	Pituitary	exon	FOCAD
8:60674068|60766689	Tissue-Specific	Pituitary	exon	nan
4:62187691|62268457	Tissue-Specific	Pituitary	intergenic_region	nan
15:65324926|65346904	Tissue-Specific	Pituitary	exon	SEC23B
9:48161468|48168468	Tissue-Specific	Pituitary	exon	FAM221A
4:33477112|33478731	Tissue-Specific	Pituitary	exon	CHD7
11:9894098|9895238	Tissue-Specific	Pituitary	exon	SNX7
1:52123108|52146669	Tissue-Specific	Pituitary	exon	nan
1:120268890|120289764	Tissue-Specific	Pituitary	exon	nan
6:69080360|69124265	Tissue-Specific	Pituitary	exon	nan
5:99288056|99335687	Tissue-Specific	Pituitary	exon	nan
10:48725367|48735750	Tissue-Specific	Pituitary	intergenic_region	nan
13:177404907|177474540	Tissue-Specific	Pituitary	intron	FBXW7
6:117384662|117444584	Tissue-Specific	Pituitary	exon	JADE1
12:842623|845071	Tissue-Specific	Pituitary	exon	TECTA
15:38265687|38272705	Tissue-Specific	Pituitary	exon	USP9X
3:101765610|101811673	Tissue-Specific	Pituitary	exon	DYM
5:82167469|82175957	Tissue-Specific	Pituitary	exon	DENND1B
2:65593910|65644625	Tissue-Specific	Pituitary	exon	IL1RAP
14:102894093|102942912	Tissue-Specific	Pituitary	exon	nan
9:92065471|92088691	Tissue-Specific	Pituitary	exon	nan
6:14143771|14168522	Tissue-Specific	Pituitary	exon	nan
1:188982442|188992708	Tissue-Specific	Pituitary	intron	ASH1L
10:16522384|16607933	Tissue-Specific	Pituitary	exon	SNX7
10:30358284|30362299	Tissue-Specific	Pituitary	exon	UHRF1BP1L
4:6343203|6392035	Tissue-Specific	Pituitary	exon	WHAMM
1:153201468|153262986	Tissue-Specific	Pituitary	intron	GPNMB
1:3319774|3337457	Tissue-Specific	Pituitary	intron	GPNMB
1:82587980|82640907	Tissue-Specific	Pituitary	exon	COG5
1:253275155|253276349	Tissue-Specific	Pituitary	exon	REPS2
15:10879939|10880893	Tissue-Specific	Pituitary	intergenic_region	nan
1:136848050|136854824	Tissue-Specific	Pituitary	exon	PIGN
7:86036358|86058691	Tissue-Specific	Pituitary	exon	DCAF10
15:53699740|53700638	Tissue-Specific	Pituitary	exon	MAGI3
6:92128391|92165946	Tissue-Specific	Pituitary	exon	SLC25A13
1:194996953|195055910	Tissue-Specific	Pituitary	exon	SECISBP2L
X:42126085|42128926	Tissue-Specific	Pituitary	exon	WDR31
2:148566861|148568107	Tissue-Specific	Pituitary	exon	CAB39L
14:79483302|79515441	Tissue-Specific	Pituitary	exon	PCCA
1:122641984|122676949	Tissue-Specific	Pituitary	exon	GOSR1
13:121571994|121596427	Tissue-Specific	Pituitary	exon	nan
1:57225039|57287905	Tissue-Specific	Pituitary	exon	RAB4A
5:71160645|71170280	Tissue-Specific	Pituitary	exon	HERC4
X:91142449|91194084	Tissue-Specific	Pituitary	exon	ATRN
11:11313988|11336042	Tissue-Specific	Pituitary	exon	ATRN
14:114097081|114145109	Tissue-Specific	Pituitary	exon	ZNF862
1:109401152|109410390	Tissue-Specific	Pituitary	exon	RASA1
6:117942103|117949417	Tissue-Specific	Pituitary	exon	FNIP1
6:151551012|151577553	Tissue-Specific	Pituitary	exon	nan
14:57665704|57708667	Tissue-Specific	Pituitary	exon	nan
3:114393451|114472373	Tissue-Specific	Pituitary	exon	ZZZ3
13:59310678|59318172	Tissue-Specific	Pituitary	exon	ZFYVE9
10:14765079|14794270	Tissue-Specific	Pituitary	exon	LRBA
6:97031228|97064987	Tissue-Specific	Pituitary	exon	INTU
2:13170048|13183126	Tissue-Specific	Pituitary	exon	CUL5
3:90315002|90352054	Tissue-Specific	Pituitary	exon	TECTA
16:21101749|21108561	Tissue-Specific	Pituitary	intergenic_region	nan
13:56972791|57024996	Tissue-Specific	Pituitary	exon	LPGAT1
6:115534071|115574834	Tissue-Specific	Pituitary	exon	KCNT2
8:87296578|87301025	Tissue-Specific	Pituitary	exon	SASH1
3:132228461|132234013	Tissue-Specific	Pituitary	exon	TLN2
9:121104671|121112133	Tissue-Specific	Pituitary	exon	DOK6
13:194843738|194859114	Tissue-Specific	Pituitary	exon	TTC39B
5:48247563|48254390	Tissue-Specific	Pituitary	exon	PCSK5
13:140502583|140547077	Tissue-Specific	Pituitary	exon	CDC42BPA
13:25634994|25708811	Tissue-Specific	Pituitary	exon	PDS5B
1:131562780|131585593	Tissue-Specific	Pituitary	exon	TDRD3
1:55823929|55828770	Tissue-Specific	Pituitary	exon	CHL1
8:76509953|76609327	Tissue-Specific	Pituitary	exon	DPCD
12:34856470|34874693	Tissue-Specific	Pituitary	intergenic_region	nan
1:3314472|3324464	Tissue-Specific	Pituitary	exon	UROS
1:123644822|123681596	Tissue-Specific	Pituitary	exon	PTPN4
8:42692208|42692667	Tissue-Specific	Pituitary	exon	nan
13:203713496|203716345	Tissue-Specific	Pituitary	exon	NSD3
9:74804078|74806481	Tissue-Specific	Pituitary	exon	STK17A
6:163299858|163324882	Tissue-Specific	Pituitary	intron	ARSB
5:84261055|84282662	Tissue-Specific	Pituitary	exon	USP31
9:25826765|25853126	Tissue-Specific	Pituitary	exon	nan
4:2738960|2793098	Tissue-Specific	Pituitary	exon	ENPP2
3:86297988|86331936	Tissue-Specific	Pituitary	exon	DPYD
1:182678727|182683158	Tissue-Specific	Pituitary	exon	EVI5
17:146932|174293	Tissue-Specific	Pituitary	intergenic_region	nan
12:17131001|17150743	Tissue-Specific	Pituitary	exon	nan
1:122765929|122805490	Tissue-Specific	Pituitary	exon	nan
3:48623130|48643634	Tissue-Specific	Pituitary	exon	TRMT10A
10:19098554|19114042	Tissue-Specific	Pituitary	exon	RUNDC3B
13:44102170|44124775	Tissue-Specific	Pituitary	exon	RUNDC3B
9:33736104|33755849	Tissue-Specific	Pituitary	exon	RCOR3
6:165355054|165368616	Tissue-Specific	Pituitary	exon	DENND4A
2:119991572|120030091	Tissue-Specific	Pituitary	intron	CDC42BPA
5:68351140|68362580	Tissue-Specific	Pituitary	exon	CPEB3
1:90035714|90046759	Tissue-Specific	Pituitary	exon	AGAP1
13:83448989|83474843	Tissue-Specific	Pituitary	exon	BMPER
4:124782532|124789165	Tissue-Specific	Pituitary	exon	EVI5
4:80963599|81041672	Tissue-Specific	Pituitary	exon	LIMCH1
7:98931841|98949784	Tissue-Specific	Pituitary	exon	LRBA
10:1226109|1286096	Tissue-Specific	Pituitary	intergenic_region	nan
18:12032369|12033304	Tissue-Specific	Pituitary	exon	ASCC3
3:32098205|32130236	Tissue-Specific	Pituitary	exon	CCPG1
1:175230307|175269814	Tissue-Specific	Pituitary	exon	SECISBP2L
3:59894074|59912731	Tissue-Specific	Pituitary	exon	ELAVL2
3:132698850|132730127	Tissue-Specific	Pituitary	exon	AKT3
6:117384662|117405373	Tissue-Specific	Pituitary	exon	nan
1:98929605|98957048	Tissue-Specific	Pituitary	exon	ODAD4
14:57538871|57540169	Tissue-Specific	Pituitary	exon	RIMBP2
3:24320705|24411382	Tissue-Specific	Pituitary	intergenic_region	nan
14:20281913|20317215	Tissue-Specific	Pituitary	exon	USP34
14:128687443|128730587	Tissue-Specific	Pituitary	exon	PPP1R21
9:84082300|84119222	Tissue-Specific	Pituitary	exon	ARID2
6:168816842|168858417	Tissue-Specific	Pituitary	exon	nan
6:139172924|139211802	Tissue-Specific	Pituitary	exon	DNAL1
9:7380032|7417219	Tissue-Specific	Pituitary	exon	PHF14
14:71161312|71239477	Tissue-Specific	Pituitary	exon	REPS2
17:38012333|38057746	Tissue-Specific	Pituitary	exon	TXNL1
3:121918073|121951612	Tissue-Specific	Pituitary	exon	TP53BP1
1:6951212|6962994	Tissue-Specific	Pituitary	exon	GKAP1
14:79383723|79441983	Tissue-Specific	Pituitary	exon	ZMYND11
12:57172831|57190571	Tissue-Specific	Pituitary	exon	PCCA
13:119655830|119671386	Tissue-Specific	Pituitary	exon	NSF
13:108669556|108683011	Tissue-Specific	Pituitary	exon	NLK
4:6367951|6392035	Tissue-Specific	Pituitary	intron	EIF4E3
3:102230627|102298741	Tissue-Specific	Pituitary	exon	CHL1
1:71031954|71055262	Tissue-Specific	Pituitary	exon	SENP5
1:593018|611340	Tissue-Specific	Pituitary	exon	ROBO2
11:11156485|11171651	Tissue-Specific	Pituitary	exon	HERC4
1:116579031|116594933	Tissue-Specific	Pituitary	exon	CPEB3
4:33415247|33478731	Tissue-Specific	Pituitary	intron	EPB41L5
18:1875193|1899899	Tissue-Specific	Pituitary	exon	TLK1
11:12275717|12282054	Tissue-Specific	Pituitary	intron	CREBRF
13:120745752|120779879	Tissue-Specific	Pituitary	exon	RANBP17
3:91727286|91809061	Tissue-Specific	Pituitary	intron	KIZ
8:65429954|65435437	Tissue-Specific	Pituitary	exon	MKLN1
9:72153385|72171007	Tissue-Specific	Pituitary	intergenic_region	nan
4:63277183|63277865	Tissue-Specific	Pituitary	exon	PRKAR1B
3:78579401|78628473	Tissue-Specific	Pituitary	exon	PTK2
13:132960754|132991254	Tissue-Specific	Pituitary	exon	MAGI3
17:5668813|5686544	Tissue-Specific	Pituitary	exon	BTBD8
9:136149896|136176358	Tissue-Specific	Pituitary	exon	ANKRD13C
18:14178768|14259662	Tissue-Specific	Pituitary	exon	ARHGAP5
5:16872405|16881021	Tissue-Specific	Pituitary	exon	ATG2B
6:163299858|163333468	Tissue-Specific	Pituitary	exon	KCNT2
1:49253412|49273638	Tissue-Specific	Pituitary	exon	TNFRSF19
9:92583601|92613945	Tissue-Specific	Pituitary	exon	SPAG1
13:144016399|144085837	Tissue-Specific	Pituitary	exon	VPS13B
4:119210217|119229594	Tissue-Specific	Pituitary	exon	SERAC1
1:593018|619011	Tissue-Specific	Pituitary	exon	LRP11
1:26118819|26120866	Tissue-Specific	Pituitary	exon	ROBO2
4:28683297|28707712	Tissue-Specific	Pituitary	exon	ERCC6
X:13482556|13506838	Tissue-Specific	Pituitary	exon	SGTB
9:17337356|17386234	Tissue-Specific	Pituitary	exon	KIAA1841
4:118723940|118727465	Tissue-Specific	Pituitary	exon	EVI5
2:88043811|88088692	Tissue-Specific	Pituitary	exon	SENP6
15:75983368|75997723	Tissue-Specific	Pituitary	exon	DENND1B
12:17563577|17580588	Tissue-Specific	Pituitary	exon	THRB
18:15010449|15019168	Tissue-Specific	Pituitary	exon	nan
2:97863407|97874039	Tissue-Specific	Pituitary	exon	ARL5A
6:161812322|161838395	Tissue-Specific	Pituitary	exon	HIBCH
14:125707566|125789786	Tissue-Specific	Pituitary	exon	DENND2A
2:117427436|117462368	Tissue-Specific	Pituitary	exon	EPB41L4A
1:143295152|143296745	Tissue-Specific	Pituitary	exon	AASDH
3:94958830|94980300	Tissue-Specific	Pituitary	exon	ATM
10:20423359|20481282	Tissue-Specific	Pituitary	exon	AKAP7
5:34019811|34033773	Tissue-Specific	Pituitary	exon	RFX3
6:80936662|80944957	Tissue-Specific	Pituitary	exon	nan
6:48504468|48510516	Tissue-Specific	Pituitary	exon	DPY19L1
8:20273058|20362374	Tissue-Specific	Pituitary	exon	BBS9
13:13882612|13895437	Tissue-Specific	Pituitary	exon	VEZT
X:61645925|61691522	Tissue-Specific	Pituitary	exon	HSPB11
1:105981849|106000228	Tissue-Specific	Pituitary	exon	ZFYVE9
6:110866624|110950014	Tissue-Specific	Pituitary	exon	nan
3:53828715|53831416	Tissue-Specific	Pituitary	exon	WDFY3
14:71973880|71978624	Tissue-Specific	Pituitary	exon	ERCC6L2
15:131998284|132068151	Tissue-Specific	Pituitary	exon	CPEB3
X:47065448|47068948	Tissue-Specific	Pituitary	exon	EHBP1
9:72430269|72438253	Tissue-Specific	Pituitary	intergenic_region	nan
6:69046551|69124265	Tissue-Specific	Pituitary	exon	SEC22B
6:135659072|135660627	Tissue-Specific	Pituitary	exon	MAN1A2
8:67421655|67448490	Tissue-Specific	Pituitary	exon	ITPR2
12:46553280|46560929	Tissue-Specific	Pituitary	exon	ATM
2:148040378|148073755	Tissue-Specific	Pituitary	intergenic_region	nan
6:163299858|163320681	Tissue-Specific	Pituitary	exon	RABGAP1L
16:3238986|3250090	Tissue-Specific	Pituitary	intergenic_region	nan
2:117381599|117427557	Tissue-Specific	Pituitary	exon	MPDZ
6:168786145|168858417	Tissue-Specific	Pituitary	exon	VPS8
4:93736189|93747422	Tissue-Specific	Pituitary	exon	CPEB3
3:59892506|59912731	Tissue-Specific	Pituitary	exon	CPEB3
4:120986690|121020589	Tissue-Specific	Pituitary	intron	NT5C2
7:110555923|110564426	Tissue-Specific	Pituitary	exon	NBAS
1:114881039|114915607	Tissue-Specific	Pituitary	exon	PTK2
9:116495462|116556539	Tissue-Specific	Pituitary	exon	ZFHX4
9:119703479|119712998	Tissue-Specific	Pituitary	exon	ITPR2
13:38326369|38327163	Tissue-Specific	Pituitary	exon	SEC24B
8:9287995|9361510	Tissue-Specific	Pituitary	exon	DCC
4:59472390|59552301	Tissue-Specific	Pituitary	exon	SEC62
9:36665959|36675619	Tissue-Specific	Pituitary	exon	FBXW8
15:44215601|44261237	Tissue-Specific	Pituitary	exon	FGFR2
1:188657930|188682827	Tissue-Specific	Pituitary	intergenic_region	nan
17:26773532|26785407	Tissue-Specific	Pituitary	exon	TRPC1
4:36759462|36779732	Tissue-Specific	Pituitary	exon	ASCC1
4:19419008|19427470	Tissue-Specific	Pituitary	exon	CSNK1G3
3:24383978|24462328	Tissue-Specific	Pituitary	exon	SRBD1
7:84803739|84827720	Tissue-Specific	Pituitary	exon	RPS6KA6
1:54501586|54529700	Tissue-Specific	Pituitary	exon	TBC1D32
18:26141847|26154535	Tissue-Specific	Pituitary	exon	REV3L
2:83861214|83904383	Tissue-Specific	Pituitary	intron	NLK
17:22257920|22347295	Tissue-Specific	Pituitary	exon	CHL1
10:59913525|59974190	Tissue-Specific	Pituitary	exon	SCAMP1
14:85576061|85611075	Tissue-Specific	Pituitary	exon	nan
12:15588780|15633473	Tissue-Specific	Pituitary	exon	SIPA1L1
6:85922219|85976168	Tissue-Specific	Pituitary	exon	ZPBP
3:93174832|93181510	Tissue-Specific	Pituitary	exon	GPHN
6:37091577|37099195	Tissue-Specific	Pituitary	exon	RFX3
9:118171512|118255005	Tissue-Specific	Pituitary	exon	SLC25A12
10:14807079|14859342	Tissue-Specific	Pituitary	exon	KIAA2026
8:42692208|42701822	Tissue-Specific	Pituitary	exon	ERP44
18:12094561|12099905	Tissue-Specific	Pituitary	exon	CCDC186
13:37893209|37904450	Tissue-Specific	Pituitary	exon	NPHP1
1:49201928|49216259	Tissue-Specific	Pituitary	exon	PTK2
15:79018338|79036513	Tissue-Specific	Pituitary	exon	SMAP1
4:72576154|72581516	Tissue-Specific	Pituitary	exon	RIMS1
13:113844578|113852783	Tissue-Specific	Pituitary	exon	FOCAD
4:94367365|94391746	Tissue-Specific	Pituitary	exon	MPHOSPH9
14:87093223|87093507	Tissue-Specific	Pituitary	exon	CCSER2
6:106710155|106737020	Tissue-Specific	Pituitary	intron	RAPGEF4
6:168831728|168858413	Tissue-Specific	Pituitary	exon	MAP4K3
14:71179829|71219793	Tissue-Specific	Pituitary	exon	nan
9:17645749|17656274	Tissue-Specific	Pituitary	exon	WASHC3
1:53102281|53157947	Tissue-Specific	Pituitary	intergenic_region	nan
9:31399805|31408451	Tissue-Specific	Pituitary	exon	CEP162
13:131991469|132002573	Tissue-Specific	Pituitary	exon	DNAAF4
18:40140465|40182605	Tissue-Specific	Pituitary	intron	CEP152
12:15601921|15633473	Tissue-Specific	Pituitary	exon	KDM4C
8:60718398|60719826	Tissue-Specific	Pituitary	exon	CDC42BPA
1:116456654|116471192	Tissue-Specific	Pituitary	exon	DENND1B
8:109371142|109378747	Tissue-Specific	Pituitary	exon	MINDY3
4:6320162|6356068	Tissue-Specific	Pituitary	exon	SPAG16
3:40954688|40955809	Tissue-Specific	Pituitary	exon	ANKH
14:82179647|82193749	Tissue-Specific	Pituitary	intergenic_region	nan
3:78952890|78963032	Tissue-Specific	Pituitary	intergenic_region	nan
3:67551520|67578236	Tissue-Specific	Pituitary	exon	PRMT3
2:117450132|117474244	Tissue-Specific	Pituitary	intergenic_region	nan
1:152818793|152833780	Tissue-Specific	Pituitary	exon	ITSN2
6:149793682|149885073	Tissue-Specific	Pituitary	exon	CSPP1
13:27664549|27688847	Tissue-Specific	Pituitary	exon	KIFAP3
1:56941440|56987501	Tissue-Specific	Pituitary	exon	OSBPL1A
15:109830349|109843497	Tissue-Specific	Pituitary	exon	HSPB11
1:64127621|64178718	Tissue-Specific	Pituitary	exon	DLG1
1:116401169|116425776	Tissue-Specific	Pituitary	intron	CACUL1
8:121948198|121954746	Tissue-Specific	Pituitary	exon	ARMC9
10:53880369|53901065	Tissue-Specific	Pituitary	exon	XRN2
14:57531792|57553314	Tissue-Specific	Pituitary	exon	ZC3H8
14:66666097|66678644	Tissue-Specific	Pituitary	exon	NRXN1
16:21108309|21136327	Tissue-Specific	Pituitary	exon	SNX14
8:74913874|74915277	Tissue-Specific	Pituitary	exon	PIGN
1:87134227|87178553	Tissue-Specific	Pituitary	exon	TRPC1
8:42693053|42701822	Tissue-Specific	Pituitary	exon	KCNH7
15:14350059|14366310	Tissue-Specific	Pituitary	exon	PTK2
5:86144043|86173720	Tissue-Specific	Pituitary	exon	nan
AEMK02000324.1:220310|240627	Tissue-Specific	Pituitary	intron	CACNA2D1
7:86024175|86032866	Tissue-Specific	Pituitary	exon	TCF12
1:106167650|106203227	Tissue-Specific	Pituitary	exon	FRY
6:37201734|37263747	Tissue-Specific	Pituitary	exon	nan
15:74631515|74690511	Tissue-Specific	Pituitary	exon	ARL13B
15:27020015|27020494	Tissue-Specific	Pituitary	intergenic_region	nan
10:16222141|16274729	Tissue-Specific	Pituitary	exon	PHKB
6:166273186|166306653	Tissue-Specific	Pituitary	exon	CACNA2D1
16:29767214|29767637	Tissue-Specific	Pituitary	exon	ATRX
13:83106829|83150083	Tissue-Specific	Pituitary	exon	nan
1:83098177|83112794	Tissue-Specific	Pituitary	intergenic_region	nan
4:28683297|28729647	Tissue-Specific	Pituitary	exon	XRN1
9:107976523|107998689	Tissue-Specific	Pituitary	exon	SH3BGR
9:41077950|41083405	Tissue-Specific	Pituitary	exon	TBC1D32
18:2071157|2073276	Tissue-Specific	Pituitary	intron	REV3L
18:39594413|39630407	Tissue-Specific	Pituitary	exon	NALCN
13:203057197|203088031	Tissue-Specific	Pituitary	exon	CLASP2
4:62187691|62283092	Tissue-Specific	Pituitary	exon	CCDC66
14:57550062|57553314	Tissue-Specific	Pituitary	exon	MCF2L2
11:43876951|43953051	Tissue-Specific	Pituitary	exon	ATRNL1
13:44019972|44078921	Tissue-Specific	Pituitary	exon	RAB3GAP1
1:82589186|82594233	Tissue-Specific	Pituitary	exon	UXS1
15:66340958|66357727	Tissue-Specific	Pituitary	exon	USP34
5:11265443|11268764	Tissue-Specific	Pituitary	exon	SPAG1
17:29041225|29057331	Tissue-Specific	Pituitary	exon	ITFG1
15:87030188|87041127	Tissue-Specific	Pituitary	exon	RALGAPA1
13:64017987|64024481	Tissue-Specific	Pituitary	exon	CDK8
12:15573036|15633473	Tissue-Specific	Pituitary	exon	TANC2
11:11171525|11231227	Tissue-Specific	Pituitary	exon	MYRIP
6:166273186|166283780	Tissue-Specific	Pituitary	exon	UBR3
6:147887915|147923231	Tissue-Specific	Pituitary	intron	ARMC9
13:157683719|157696297	Tissue-Specific	Pituitary	exon	MICU3
15:59200873|59230432	Tissue-Specific	Pituitary	exon	ITSN2
7:97028536|97036826	Tissue-Specific	Pituitary	exon	SPATA6
X:36792047|36808341	Tissue-Specific	Pituitary	exon	ACER3
9:17379333|17406065	Tissue-Specific	Pituitary	exon	CLIP4
8:12862839|12920387	Tissue-Specific	Pituitary	exon	REV3L
16:53111245|53150253	Tissue-Specific	Pituitary	exon	AKT3
8:87630191|87664522	Tissue-Specific	Pituitary	exon	HERC4
9:10247446|10343622	Tissue-Specific	Pituitary	exon	ZFYVE16
4:117692410|117724737	Tissue-Specific	Pituitary	exon	CCDC88A
2:2365031|2365589	Tissue-Specific	Pituitary	exon	STAU2
1:168561111|168580039	Tissue-Specific	Pituitary	exon	PHTF1
14:114080488|114145109	Tissue-Specific	Pituitary	exon	ANKS1B
7:98955045|99054163	Tissue-Specific	Pituitary	exon	TBC1D19
6:118650173|118685055	Tissue-Specific	Pituitary	exon	RUNDC3B
14:85602428|85650019	Tissue-Specific	Pituitary	exon	ICA1L
5:65907655|65941065	Tissue-Specific	Pituitary	exon	CYP20A1
14:29695893|29718818	Tissue-Specific	Pituitary	exon	VWF
6:147045049|147047211	Tissue-Specific	Pituitary	intron	ADGRL3
14:90007855|90013460	Tissue-Specific	Pituitary	exon	KLHL7
1:50838737|50870956	Tissue-Specific	Pituitary	exon	CCDC171
15:131998284|132021440	Tissue-Specific	Pituitary	exon	TRPM3
9:97358654|97364617	Tissue-Specific	Pituitary	exon	nan
9:105035941|105061896	Tissue-Specific	Pituitary	exon	ATP2B1
7:102568147|102607266	Tissue-Specific	Pituitary	exon	EFHC1
X:47028477|47068948	Tissue-Specific	Pituitary	intron	DENND1B
3:69353541|69386742	Tissue-Specific	Pituitary	exon	SLK
13:60426791|60437865	Tissue-Specific	Pituitary	exon	KIAA1841
1:242242621|242310793	Tissue-Specific	Pituitary	exon	VPS35
8:135444527|135453410	Tissue-Specific	Pituitary	exon	KTN1
4:106845342|106859846	Tissue-Specific	Pituitary	exon	CCDC171
14:124868787|124870804	Tissue-Specific	Pituitary	exon	CLASP2
15:106867717|106898719	Tissue-Specific	Pituitary	exon	nan
1:216332768|216355572	Tissue-Specific	Pituitary	exon	TTC3
13:106180773|106209958	Tissue-Specific	Pituitary	exon	MICU3
1:27472676|27530363	Tissue-Specific	Pituitary	intron	nan
X:59282807|59291372	Tissue-Specific	Pituitary	exon	AEBP2
3:96116880|96156923	Tissue-Specific	Pituitary	intergenic_region	nan
7:62685674|62719144	Tissue-Specific	Pituitary	exon	KIAA1328
11:69863627|69911720	Tissue-Specific	Pituitary	exon	ATP8A1
14:119731986|119736882	Tissue-Specific	Pituitary	exon	PHF14
1:199056040|199093207	Tissue-Specific	Pituitary	exon	UBR3
6:159984990|160000902	Tissue-Specific	Pituitary	exon	ZFR
14:48230109|48248845	Tissue-Specific	Pituitary	exon	PHTF1
1:52035721|52041946	Tissue-Specific	Pituitary	intron	nan
2:101314180|101359793	Tissue-Specific	Pituitary	exon	ATM
18:38826704|38870178	Tissue-Specific	Pituitary	exon	CCDC15
14:29674052|29718818	Tissue-Specific	Pituitary	exon	CASD1
15:38614686|38636054	Tissue-Specific	Pituitary	exon	ITGB8
1:75718076|75759232	Tissue-Specific	Pituitary	exon	FAM120C
1:207082558|207131833	Tissue-Specific	Pituitary	intron	LRP11
1:77311241|77334918	Tissue-Specific	Pituitary	exon	NALCN
4:106957338|106980982	Tissue-Specific	Pituitary	exon	ZCWPW2
6:150941876|151023867	Tissue-Specific	Pituitary	exon	IMPG2
4:33133244|33200311	Tissue-Specific	Pituitary	exon	TTC3
9:48161462|48168468	Tissue-Specific	Pituitary	exon	UBR3
3:24390649|24462328	Tissue-Specific	Pituitary	intron	nan
1:54472561|54509899	Tissue-Specific	Pituitary	exon	BCAT1
4:100446495|100449293	Tissue-Specific	Pituitary	exon	TBCK
1:131262572|131273283	Tissue-Specific	Pituitary	exon	ANKRD42
14:103714597|103728545	Tissue-Specific	Pituitary	exon	MTMR2
18:24180956|24211815	Tissue-Specific	Pituitary	intergenic_region	nan
13:79310761|79311205	Tissue-Specific	Pituitary	exon	PHF14
11:76196049|76204196	Tissue-Specific	Pituitary	exon	RXRG
7:77950751|77969059	Tissue-Specific	Pituitary	intron	SNAP91
6:149607728|149666969	Tissue-Specific	Pituitary	exon	SNAP91
13:157429171|157446764	Tissue-Specific	Pituitary	exon	DCLK1
15:75983368|76001686	Tissue-Specific	Pituitary	intergenic_region	nan
9:74325189|74342716	Tissue-Specific	Pituitary	exon	GRID1
3:5347407|5379627	Tissue-Specific	Pituitary	exon	PCGF5
1:14717658|14717914	Tissue-Specific	Pituitary	exon	GPD2
11:25301639|25343890	Tissue-Specific	Pituitary	exon	KIF3A
8:45999321|46001736	Tissue-Specific	Pituitary	exon	EYA1
8:133784502|133797336	Tissue-Specific	Pituitary	exon	ANKS1B
13:55885663|55926478	Tissue-Specific	Pituitary	intron	ASXL3
3:115080540|115090936	Tissue-Specific	Pituitary	exon	ATP8A1
7:64846241|64854244	Tissue-Specific	Pituitary	exon	PRDM5
14:33900585|33953562	Tissue-Specific	Pituitary	exon	nan
11:71115695|71123774	Tissue-Specific	Pituitary	exon	TIAM1
13:37769965|37836335	Tissue-Specific	Pituitary	exon	DMXL2
9:80711086|80762014	Tissue-Specific	Pituitary	exon	TTBK2
8:15085506|15125114	Tissue-Specific	Pituitary	exon	PIAS1
15:114194690|114202452	Tissue-Specific	Pituitary	exon	TAOK3
5:76443416|76538689	Tissue-Specific	Pituitary	exon	FMN1
15:114147755|114226716	Tissue-Specific	Pituitary	exon	TNIK
X:64299188|64313854	Tissue-Specific	Pituitary	exon	DPYSL2
1:168647302|168680957	Tissue-Specific	Pituitary	exon	SYT14
6:163299858|163348482	Tissue-Specific	Pituitary	exon	HK3
10:14826467|14859342	Tissue-Specific	Pituitary	exon	NBAS
2:89266459|89278885	Tissue-Specific	Pituitary	exon	MCTP2
AEMK02000324.1:140081|147097	Tissue-Specific	Pituitary	exon	ELAVL4
2:89323270|89377048	Tissue-Specific	Pituitary	exon	XPR1
6:158344131|158362828	Tissue-Specific	Pituitary	exon	ZBTB11
1:120267236|120283587	Tissue-Specific	Pituitary	exon	ITGB8
11:43799533|43812135	Tissue-Specific	Pituitary	exon	STX3
7:56881715|56927415	Tissue-Specific	Pituitary	exon	AXIN2
13:30678033|30691776	Tissue-Specific	Pituitary	exon	CMTR1
15:95531539|95537276	Tissue-Specific	Pituitary	exon	LRBA
9:83735132|83751724	Tissue-Specific	Pituitary	exon	RTKN2
3:80418060|80440141	Tissue-Specific	Pituitary	exon	CACUL1
15:80810979|80813594	Tissue-Specific	Pituitary	exon	PDE10A
1:18699023|18764492	Tissue-Specific	Pituitary	exon	PACRG
1:28659701|28726452	Tissue-Specific	Pituitary	exon	SENP6
3:127285171|127336955	Tissue-Specific	Pituitary	exon	nan
13:54119777|54173527	Tissue-Specific	Pituitary	intron	nan
9:118243545|118255005	Tissue-Specific	Pituitary	intron	SPAG16
16:44513270|44521925	Tissue-Specific	Pituitary	exon	ANKEF1
1:16172775|16178803	Tissue-Specific	Pituitary	exon	DNAH6
4:117700973|117775497	Tissue-Specific	Pituitary	exon	C8orf34
5:98808700|98859107	Tissue-Specific	Pituitary	exon	CSPP1
1:41135588|41164096	Tissue-Specific	Pituitary	exon	ELAPOR1
9:80711086|80741082	Tissue-Specific	Pituitary	exon	LRRIQ1
3:122118085|122133932	Tissue-Specific	Pituitary	exon	DNAI4
4:14607025|14636255	Tissue-Specific	Pituitary	exon	DCHS2
1:202176836|202228210	Tissue-Specific	Pituitary	exon	RAB27A
2:140103134|140119847	Tissue-Specific	Pituitary	exon	FSIP1
2:101341259|101359793	Tissue-Specific	Pituitary	exon	ULK4
1:202156543|202207406	Tissue-Specific	Pituitary	exon	TRPC1
14:112629412|112637237	Tissue-Specific	Pituitary	exon	SPAG16
16:34508911|34540328	Tissue-Specific	Pituitary	intergenic_region	nan
4:36796977|36810911	Tissue-Specific	Pituitary	exon	ANGPT1
12:36543485|36599831	Tissue-Specific	Pituitary	exon	KIF21A
4:124520361|124539837	Tissue-Specific	Pituitary	exon	nan
18:1965637|1967623	Tissue-Specific	Pituitary	exon	nan
1:71031954|71074187	Tissue-Specific	Pituitary	exon	SGIP1
6:145939430|145956948	Tissue-Specific	Pituitary	exon	ARAP2
1:128284940|128300710	Tissue-Specific	Pituitary	exon	NSUN7
15:14686876|14700753	Tissue-Specific	Pituitary	exon	NDST3
1:43058611|43093609	Tissue-Specific	Pituitary	exon	INTS6L
7:110550360|110573207	Tissue-Specific	Pituitary	intergenic_region	nan
X:51702109|51702872	Tissue-Specific	Pituitary	exon	DPYSL2
9:24674360|24692038	Tissue-Specific	Pituitary	exon	SPAG16
X:112038887|112077442	Tissue-Specific	Pituitary	exon	SRPK2
15:106844508|106867875	Tissue-Specific	Pituitary	exon	PDE10A
1:177165548|177255991	Tissue-Specific	Pituitary	exon	CCDC181
6:11500490|11553573	Tissue-Specific	Pituitary	exon	BICD1
15:112590295|112600022	Tissue-Specific	Pituitary	exon	PDE10A
15:79059825|79066757	Tissue-Specific	Pituitary	exon	MAP9
15:14308571|14366310	Tissue-Specific	Pituitary	intron	SSNA1
11:12137091|12154145	Tissue-Specific	Pituitary	exon	FMN1
15:106326283|106332960	Tissue-Specific	Pituitary	exon	SOAT1
14:79362477|79364310	Tissue-Specific	Pituitary	exon	MAP3K5
7:86072288|86087677	Tissue-Specific	Pituitary	exon	WDFY3
10:40771583|40790913	Tissue-Specific	Pituitary	intergenic_region	nan
14:57701529|57708667	Tissue-Specific	Pituitary	exon	DHX57
8:33399939|33432916	Tissue-Specific	Pituitary	exon	ANKRD42
4:67537059|67565623	Tissue-Specific	Pituitary	exon	VWA8
9:84105161|84135683	Tissue-Specific	Pituitary	exon	WDFY3
10:31579272|31640807	Tissue-Specific	Pituitary	exon	LCA5
3:80728759|80729963	Tissue-Specific	Pituitary	exon	KIAA1841
3:69289917|69317475	Tissue-Specific	Pituitary	exon	HS3ST5
1:238594023|238626475	Tissue-Specific	Pituitary	exon	MYO6
10:14765079|14807172	Tissue-Specific	Pituitary	exon	MYO6
9:53347881|53437896	Tissue-Specific	Pituitary	exon	LRP1B
10:14786194|14850824	Tissue-Specific	Pituitary	exon	NRG1
12:44273593|44277243	Tissue-Specific	Pituitary	intergenic_region	nan
8:38279848|38287382	Tissue-Specific	Pituitary	exon	GEM
1:96631010|96676021	Tissue-Specific	Pituitary	exon	TTLL7
13:50301582|50304035	Tissue-Specific	Pituitary	exon	CACHD1
2:87254645|87259158	Tissue-Specific	Pituitary	exon	SPATA6
1:82332440|82342386	Tissue-Specific	Pituitary	exon	DGKB
16:4141884|4163061	Tissue-Specific	Pituitary	exon	MAGI2
3:357113|367309	Tissue-Specific	Pituitary	exon	ATL1
1:215191228|215266887	Tissue-Specific	Pituitary	exon	GKAP1
13:143814137|143816940	Tissue-Specific	Pituitary	exon	TRPC1
15:135806162|135831517	Tissue-Specific	Pituitary	intron	CCDC173
15:78721345|78722235	Tissue-Specific	Pituitary	exon	GCFC2
1:43044715|43058733	Tissue-Specific	Pituitary	exon	DNAJC6
13:25565162|25610799	Tissue-Specific	Pituitary	exon	MAP9
6:111071719|111096960	Tissue-Specific	Pituitary	intron	UVRAG
13:33599890|33611769	Tissue-Specific	Pituitary	exon	DYNC2H1
14:103704916|103752747	Tissue-Specific	Pituitary	exon	PDE10A
5:14028718|14030705	Tissue-Specific	Pituitary	exon	AHI1
2:67883951|67886976	Tissue-Specific	Pituitary	exon	ADGRB3
7:98906872|98920276	Tissue-Specific	Pituitary	exon	PPIL6
9:98070810|98126619	Tissue-Specific	Pituitary	exon	CDC42BPA
14:114947310|114950737	Tissue-Specific	Pituitary	exon	NTRK2
2:29384221|29420883	Tissue-Specific	Pituitary	exon	DNAH9
14:55547865|55569736	Tissue-Specific	Pituitary	exon	NEK10
15:61776302|61780560	Tissue-Specific	Pituitary	exon	DOCK3
10:45992309|46047270	Tissue-Specific	Pituitary	exon	ERC2
10:12407369|12417836	Tissue-Specific	Pituitary	exon	STXBP5L
3:121918073|121944155	Tissue-Specific	Pituitary	exon	DYRK1A
9:9829688|9836566	Tissue-Specific	Pituitary	exon	CFAP251
14:77706066|77733586	Tissue-Specific	Pituitary	exon	CCDC173
11:9145564|9190868	Tissue-Specific	Pituitary	exon	ITGAV
13:33513039|33520607	Tissue-Specific	Pituitary	exon	DNAH7
5:33533423|33555287	Tissue-Specific	Pituitary	exon	ERBB4
4:67698424|67724881	Tissue-Specific	Pituitary	exon	DNAH5
10:14774820|14794270	Tissue-Specific	Pituitary	exon	DNAH5
4:102889155|102929340	Tissue-Specific	Pituitary	intergenic_region	nan
17:32117204|32127002	Tissue-Specific	Pituitary	exon	PCM1
4:2738960|2774992	Tissue-Specific	Pituitary	exon	IQUB
12:51614278|51680596	Tissue-Specific	Pituitary	exon	FAR1
1:77263699|77279692	Tissue-Specific	Pituitary	exon	FAM169A
7:51408941|51436247	Tissue-Specific	Pituitary	exon	SLF1
7:64279287|64327181	Tissue-Specific	Pituitary	exon	CLIP4
8:103297224|103321590	Tissue-Specific	Pituitary	exon	KHDRBS3
8:31236052|31244845	Tissue-Specific	Pituitary	intron	RIMS2
8:109350766|109359872	Tissue-Specific	Pituitary	exon	nan
1:41083415|41180922	Tissue-Specific	Pituitary	exon	BTBD9
9:101931308|101931946	Tissue-Specific	Pituitary	exon	NSUN7
13:95421955|95458826	Tissue-Specific	Pituitary	exon	PLK4
16:20650102|20655924	Tissue-Specific	Pituitary	exon	SPATA5
2:29384221|29460724	Tissue-Specific	Pituitary	exon	NPAT
1:248145066|248157537	Tissue-Specific	Pituitary	exon	PPP1R9A
8:42693053|42696681	Tissue-Specific	Pituitary	exon	TDRD5
1:202170881|202228210	Tissue-Specific	Pituitary	exon	LRCH2
X:91166764|91185435	Tissue-Specific	Pituitary	exon	DDHD1
2:94936432|94950343	Tissue-Specific	Pituitary	exon	RAPGEF4
1:182669987|182720865	Tissue-Specific	Pituitary	intron	ASXL3
14:131238819|131261017	Tissue-Specific	Pituitary	exon	nan
16:21172236|21212834	Tissue-Specific	Pituitary	exon	RIMS2
11:4104218|4158317	Tissue-Specific	Pituitary	exon	PCLO
13:107075796|107085025	Tissue-Specific	Pituitary	exon	PAK3
15:11035986|11065008	Tissue-Specific	Pituitary	exon	ULK4
14:33900585|33923346	Tissue-Specific	Pituitary	exon	PIGU
10:44833809|44849953	Tissue-Specific	Pituitary	exon	NBAS
1:189132379|189138606	Tissue-Specific	Pituitary	intron	PPP2R3A
3:80707494|80738790	Tissue-Specific	Pituitary	exon	FZD3
8:78149537|78199258	Tissue-Specific	Pituitary	intron	RIMS2
8:38546483|38559757	Tissue-Specific	Pituitary	exon	GRIP1
1:182683009|182720865	Tissue-Specific	Pituitary	exon	TTLL7
11:11294870|11336042	Tissue-Specific	Pituitary	exon	CUL5
6:37957475|37971124	Tissue-Specific	Pituitary	exon	LCA5
1:116466531|116484453	Tissue-Specific	Pituitary	exon	WDR17
6:162706864|162708261	Tissue-Specific	Pituitary	exon	WDR17
11:8561600|8604797	Tissue-Specific	Pituitary	exon	SH3YL1
2:40077851|40078496	Tissue-Specific	Pituitary	exon	RIMS2
5:84247046|84261351	Tissue-Specific	Pituitary	intergenic_region	nan
1:74930300|74948104	Tissue-Specific	Pituitary	exon	CACHD1
2:83858097|83904383	Tissue-Specific	Pituitary	exon	nan
7:33021729|33031540	Tissue-Specific	Pituitary	exon	ATM
14:71198187|71239477	Tissue-Specific	Pituitary	exon	SUCO
13:200707866|200759988	Tissue-Specific	Pituitary	exon	KCTD1
9:80715795|80741082	Tissue-Specific	Pituitary	exon	nan
10:69182550|69235186	Tissue-Specific	Pituitary	exon	LRP11
7:46291603|46301577	Tissue-Specific	Pituitary	exon	RALGPS1
1:159242075|159279434	Tissue-Specific	Pituitary	exon	NBEA
4:85325520|85338393	Tissue-Specific	Pituitary	exon	TANC2
3:67569694|67578236	Tissue-Specific	Pituitary	exon	BRIP1
10:20428975|20481282	Tissue-Specific	Pituitary	exon	MAN2A1
3:46333828|46341322	Tissue-Specific	Pituitary	exon	ZNF484
12:20777847|20784842	Tissue-Specific	Pituitary	exon	VAT1L
1:35756051|35774156	Tissue-Specific	Pituitary	exon	ABI2
11:11313988|11328212	Tissue-Specific	Pituitary	intron	KCND2
2:80975762|81028030	Tissue-Specific	Pituitary	exon	EPB41L4A
5:100191083|100193672	Tissue-Specific	Pituitary	exon	MAP9
18:40140465|40200881	Tissue-Specific	Pituitary	exon	MAP3K5
1:68439845|68462249	Tissue-Specific	Pituitary	exon	HACE1
13:180591411|180619173	Tissue-Specific	Pituitary	exon	ME2
2:98098951|98114339	Tissue-Specific	Pituitary	intron	SLC24A5
5:99261643|99335687	Tissue-Specific	Pituitary	exon	DACH1
9:27885976|27895820	Tissue-Specific	Pituitary	exon	SCAMP1
5:47360644|47385418	Tissue-Specific	Pituitary	exon	WNK3
13:201121683|201145228	Tissue-Specific	Pituitary	exon	MYEF2
8:132106182|132145167	Tissue-Specific	Pituitary	exon	CCDC171
14:31548156|31581475	Tissue-Specific	Pituitary	exon	GLS
15:131998300|132068151	Tissue-Specific	Pituitary	exon	PJA2
14:12330427|12367810	Tissue-Specific	Pituitary	exon	SPAG1
6:14161082|14199845	Tissue-Specific	Pituitary	exon	POLR3B
7:110550360|110564426	Tissue-Specific	Pituitary	exon	ATL1
13:55926344|56000770	Tissue-Specific	Pituitary	exon	LRRC9
16:8315562|8344688	Tissue-Specific	Pituitary	exon	ESR2
1:100186767|100220451	Tissue-Specific	Pituitary	exon	NDUFB6
14:128729497|128736472	Tissue-Specific	Pituitary	exon	UPF3A
9:32655059|32660347	Tissue-Specific	Pituitary	exon	ROBO2
9:36581948|36599564	Tissue-Specific	Pituitary	exon	GALNT13
6:159918293|159953975	Tissue-Specific	Pituitary	intron	DGKI
10:30329693|30358589	Tissue-Specific	Pituitary	exon	GTF2A1L
8:132610461|132709741	Tissue-Specific	Pituitary	exon	nan
14:24708098|24715038	Tissue-Specific	Pituitary	exon	DYNC2H1
15:48183489|48195196	Tissue-Specific	Pituitary	intron	PRKAR2B
X:112022477|112077442	Tissue-Specific	Pituitary	exon	KCNK2
12:36372064|36388515	Tissue-Specific	Pituitary	exon	WNK3
6:168789896|168796206	Tissue-Specific	Pituitary	intron	WNK3
13:46978757|46991892	Tissue-Specific	Pituitary	exon	nan
8:31875367|31900809	Tissue-Specific	Pituitary	exon	AHI1
1:123644822|123671511	Tissue-Specific	Pituitary	intergenic_region	nan
12:50710506|50723977	Tissue-Specific	Pituitary	exon	FAM169A
9:33968173|34033873	Tissue-Specific	Pituitary	intron	PLEKHA5
13:38455857|38474769	Tissue-Specific	Pituitary	intergenic_region	nan
6:129756751|129799777	Tissue-Specific	Pituitary	exon	DEUP1
8:81113188|81133399	Tissue-Specific	Pituitary	exon	AHI1
12:43595390|43625069	Tissue-Specific	Pituitary	exon	CCPG1
9:80715795|80762014	Tissue-Specific	Pituitary	exon	ARMC2
3:98614969|98651370	Tissue-Specific	Pituitary	exon	FSIP1
2:101096183|101194583	Tissue-Specific	Pituitary	exon	GRIK1
8:15073623|15122521	Tissue-Specific	Pituitary	exon	SPEF2
1:180354440|180372232	Tissue-Specific	Pituitary	exon	nan
15:77937140|77974659	Tissue-Specific	Pituitary	exon	DNAH6
4:81717206|81769869	Tissue-Specific	Pituitary	exon	OPRK1
9:108860382|108899562	Tissue-Specific	Pituitary	exon	TTLL5
14:65725545|65768393	Tissue-Specific	Pituitary	intergenic_region	nan
10:1359645|1457127	Tissue-Specific	Pituitary	intron	nan
5:38584761|38592467	Tissue-Specific	Pituitary	intron	nan
6:69046551|69072948	Tissue-Specific	Pituitary	intron	nan
2:102135990|102144619	Tissue-Specific	Pituitary	exon	TBC1D32
3:80716885|80729963	Tissue-Specific	Pituitary	exon	ADGRB3
2:50831116|50886317	Tissue-Specific	Pituitary	exon	RIMS1
1:55823929|55849796	Tissue-Specific	Pituitary	exon	nan
14:135110370|135119739	Tissue-Specific	Pituitary	intron	KLHL32
9:36456127|36497094	Tissue-Specific	Pituitary	exon	KLHL32
15:63626162|63661287	Tissue-Specific	Pituitary	exon	SNAP91
1:224119344|224120896	Tissue-Specific	Pituitary	exon	WDR7
13:139243963|139335327	Tissue-Specific	Pituitary	exon	LRRC49
2:29420678|29460724	Tissue-Specific	Pituitary	exon	CCDC175
6:20807587|20808636	Tissue-Specific	Pituitary	exon	TRPM3
1:163711711|163732246	Tissue-Specific	Pituitary	intergenic_region	nan
9:10229873|10260721	Tissue-Specific	Pituitary	exon	NTRK2
5:52271742|52294175	Tissue-Specific	Pituitary	exon	ATP8A2
14:140957257|140960561	Tissue-Specific	Pituitary	exon	NALCN
1:169443839|169453759	Tissue-Specific	Pituitary	exon	NALCN
7:116399251|116416766	Tissue-Specific	Pituitary	exon	NALCN
14:6745390|6803080	Tissue-Specific	Pituitary	exon	FGF14
6:166273186|166293909	Tissue-Specific	Pituitary	exon	TEX14
4:33415247|33494115	Tissue-Specific	Pituitary	exon	RPH3AL
2:83881770|83917367	Tissue-Specific	Pituitary	exon	ARHGAP44
1:241809453|241850360	Tissue-Specific	Pituitary	intergenic_region	nan
9:104960017|104971638	Tissue-Specific	Pituitary	exon	nan
14:124480325|124504865	Tissue-Specific	Pituitary	exon	nan
5:68251878|68321820	Tissue-Specific	Pituitary	exon	nan
2:42316517|42317210	Tissue-Specific	Pituitary	exon	nan
14:71161312|71219793	Tissue-Specific	Pituitary	exon	nan
9:89389192|89400450	Tissue-Specific	Pituitary	exon	CNTN3
14:32709878|32734205	Tissue-Specific	Pituitary	exon	CNTN3
13:37560877|37576964	Tissue-Specific	Pituitary	intron	CNTN3
10:48818275|48824559	Tissue-Specific	Pituitary	exon	nan
6:10035978|10093860	Tissue-Specific	Pituitary	exon	PEX5L
3:114393451|114422084	Tissue-Specific	Pituitary	exon	STXBP5L
9:45877120|45893775	Tissue-Specific	Pituitary	exon	DSCAM
2:117419182|117474244	Tissue-Specific	Pituitary	exon	DSCAM
12:44486691|44496814	Tissue-Specific	Pituitary	exon	SPOCK3
8:31216942|31263380	Tissue-Specific	Pituitary	exon	KSR2
1:49189827|49273638	Tissue-Specific	Pituitary	exon	KSR2
2:97828990|97863616	Tissue-Specific	Pituitary	exon	KSR2
10:31153774|31220915	Tissue-Specific	Pituitary	intergenic_region	nan
2:117427436|117474244	Tissue-Specific	Pituitary	exon	nan
5:45263440|45316258	Tissue-Specific	Pituitary	exon	nan
1:55835924|55843526	Tissue-Specific	Pituitary	exon	THSD7B
16:45565816|45633238	Tissue-Specific	Pituitary	exon	GPM6A
1:199056040|199059168	Tissue-Specific	Pituitary	exon	NRG1
6:149793682|149868737	Tissue-Specific	Pituitary	exon	CCDC148
7:121738955|121782820	Tissue-Specific	Pituitary	exon	nan
15:114264665|114282204	Tissue-Specific	Pituitary	exon	RAPGEF4
7:46271574|46301577	Tissue-Specific	Pituitary	exon	ADAM23
4:78625040|78661386	Tissue-Specific	Pituitary	exon	MAP2
X:46832331|46853956	Tissue-Specific	Pituitary	exon	UNC80
5:96961432|96971594	Tissue-Specific	Pituitary	exon	UNC80
10:1658498|1675268	Tissue-Specific	Pituitary	exon	nan
5:13649917|13663955	Tissue-Specific	Pituitary	exon	NRF1
1:218569068|218587363	Tissue-Specific	Pituitary	exon	KCND2
8:60513581|60514381	Tissue-Specific	Pituitary	exon	DCDC1
6:109082436|109150901	Tissue-Specific	Pituitary	intergenic_region	nan
13:33415280|33457051	Tissue-Specific	Pituitary	exon	FAM169A
3:125889257|125943717	Tissue-Specific	Pituitary	intergenic_region	nan
4:94324418|94391746	Tissue-Specific	Pituitary	intron	PPP2R2B
11:74623147|74627181	Tissue-Specific	Pituitary	exon	STK32A
6:100951443|100955160	Tissue-Specific	Pituitary	exon	USP34
14:10512257|10520647	Tissue-Specific	Pituitary	intergenic_region	nan
9:102378852|102407759	Tissue-Specific	Pituitary	intergenic_region	nan
14:114918361|114922103	Tissue-Specific	Pituitary	intron	EML6
18:26519875|26526850	Tissue-Specific	Pituitary	exon	EML6
15:10842794|10848533	Tissue-Specific	Pituitary	exon	EML6
15:115821483|115867040	Tissue-Specific	Pituitary	exon	EML6
2:133999110|134034219	Tissue-Specific	Pituitary	exon	ENPP2
1:90254630|90269663	Tissue-Specific	Pituitary	intron	RIMS2
6:29357173|29384324	Tissue-Specific	Pituitary	exon	RIMS2
2:89061670|89089816	Tissue-Specific	Pituitary	intron	RIMS2
15:112422019|112426486	Tissue-Specific	Pituitary	exon	SNTG1
9:97818030|97883761	Tissue-Specific	Pituitary	exon	SNTG1
6:69046551|69107088	Tissue-Specific	Pituitary	exon	SNTG1
5:96898702|96938816	Tissue-Specific	Pituitary	exon	CCDC181
5:96874818|96898821	Tissue-Specific	Pituitary	exon	NME7
1:159375767|159390684	Tissue-Specific	Pituitary	exon	PLPPR4
9:105040720|105060890	Tissue-Specific	Pituitary	exon	POLR3B
17:4765508|4793691	Tissue-Specific	Pituitary	exon	ANKS1B
17:26704808|26713892	Tissue-Specific	Pituitary	exon	nan
9:102007813|102026592	Tissue-Specific	Pituitary	intergenic_region	nan
6:117422164|117444584	Tissue-Specific	Pituitary	intergenic_region	nan
5:41937707|41942985	Tissue-Specific	Pituitary	intergenic_region	nan
9:97350815|97395894	Tissue-Specific	Pituitary	intron	NOL4
3:92171054|92196690	Tissue-Specific	Pituitary	exon	NOL4
16:64257835|64300665	Tissue-Specific	Pituitary	intron	NOL4
11:18313796|18387865	Tissue-Specific	Pituitary	exon	CACHD1
1:90180046|90185143	Tissue-Specific	Pituitary	exon	EML5
1:219288682|219349315	Tissue-Specific	Pituitary	exon	UNC79
13:19376546|19383578	Tissue-Specific	Pituitary	intergenic_region	nan
11:3840386|3850282	Tissue-Specific	Pituitary	exon	CC2D2A
10:26152324|26170914	Tissue-Specific	Pituitary	exon	CPE
X:61667488|61702090	Tissue-Specific	Pituitary	exon	DCHS2
1:159368257|159375875	Tissue-Specific	Pituitary	exon	NDST3
13:54119777|54175789	Tissue-Specific	Pituitary	intergenic_region	nan
1:159368257|159381432	Tissue-Specific	Pituitary	exon	MAPK10
8:112690688|112703724	Tissue-Specific	Pituitary	exon	MAPK10
9:132886133|132891266	Tissue-Specific	Pituitary	exon	GRM5
1:3331636|3337457	Tissue-Specific	Pituitary	intergenic_region	nan
1:205085374|205093024	Tissue-Specific	Pituitary	exon	DRD2
6:159908971|159943735	Tissue-Specific	Pituitary	exon	RUNDC3B
X:47014333|47034690	Tissue-Specific	Pituitary	exon	PCLO
1:32277228|32354628	Tissue-Specific	Pituitary	exon	MAGI2
14:75069485|75086763	Tissue-Specific	Pituitary	exon	NRCAM
3:98708204|98763556	Tissue-Specific	Pituitary	exon	AMPH
14:29674052|29684479	Tissue-Specific	Pituitary	exon	SYT14
13:120762855|120779879	Tissue-Specific	Pituitary	exon	SYT14
1:3351466|3368539	Tissue-Specific	Pituitary	intergenic_region	nan
[truncated: 1,983 more rows]

## Sheet: Table S5
Table S5.Housekeeping circRNAs located in housekeeping genes
CircRNA ID	Parental Gene
1:1654692|1663793	AFDN
1:4775755|4843415	QKI
1:12041132|12043885	SCAF8
1:45173524|45175843	PTP4A1
1:55666252|55669095	ZNF292
1:66353976|66356192	PNISR
1:77086749|77087208	RPF2
1:87134227|87153004	PHIP
1:95846715|95847499	C18orf25
1:100589850|100613174	SMAD4
1:106148090|106150609	WDR7
1:107552365|107553238	ZNF609
1:112996635|113013582	RNF111
1:113128000|113128579	SLTM
1:119735151|119740313	MAPK6
1:119905146|119909321	TMOD3
1:121217326|121230821	TRPM7
1:121330342|121335034	USP8
1:127746552|127748761	MFAP1
1:129651197|129662208	MGA
1:129687076|129688206	MGA
1:131326820|131340853	EIF2AK4
1:137638041|137638586	IGF1R
1:164420445|164422619	MAP2K1
1:166033284|166037819	PIAS1
1:169551755|169559446	MYO9A
1:203531906|203537078	DENND4C
1:203531906|203547745	DENND4C
1:216148995|216177064	KIAA2026
1:219010541|219028462	PUM3
1:241979932|241998014	INVS
1:242111791|242116331	TEX10
1:253012174|253014268	PTBP3
1:253514454|253516759	SNX30
1:263873074|263916275	RABGAP1
1:263873074|263940366	RABGAP1
1:263932775|263940366	RABGAP1
1:266296454|266312704	MAPKAP1
13:4115487|4120836	PLCL2
13:22216776|22239729	GOLGA4
13:26160701|26169083	NKTR
13:30524874|30547685	SMARCC1
13:31682729|31683772	QRICH1
13:32466924|32541480	RBM6
13:32471840|32478114	RBM6
13:34824030|34825924	GNL3
13:38538687|38545830	TASOR
13:66493801|66495580	SEC13
13:68611370|68611602	RAF1
13:75615215|75652667	CEP63
13:94336123|94338366	DHX36
13:97912254|97913066	RSRC1
13:108851501|108854260	PHC3
13:108874660|108880840	PHC3
13:108842609|108854260	PHC3
13:120931036|120935351	MCCC1
13:121576383|121596427	KLHL24
13:122727540|122750151	VPS8
13:133296684|133312344	PAK2
13:134998506|135020313	ZNF148
13:135007591|135020313	ZNF148
13:140731010|140750477	TIMMDC1
13:200707866|200731785	TTC3
13:201067069|201121879	DYRK1A
6:1051422|1057079	ZC3H18
6:3813863|3814709	ZDHHC7
6:12234387|12236356	CFDP1
6:12234387|12252148	CFDP1
6:19130076|19141898	PSME3IP1
6:28311909|28312248	GFOD2
6:28711467|28714979	NFATC3
6:29344146|29357287	NUDT21
6:31978481|31980100	CHD9
6:34107266|34112786	CYLD
6:34743079|34747797	HEATR3
6:37127249|37166517	PHKB
6:43867657|43870512	LSM14A
6:43879422|43894306	LSM14A
6:54244674|54245209	GYS1
6:54801799|54802488	AP2A1
6:70428067|70430862	UBE4B
6:75038901|75043103	SPEN
6:89127456|89131566	S100PBP
6:91566041|91575552	ZMYM4
6:91593753|91605991	ZMYM4
6:92155928|92170345	AGO1
6:98504293|98506141	PPP4R1
6:103898018|103929043	SMCHD1
6:103910117|103911289	SMCHD1
6:106750398|106771048	ESCO1
6:106936502|106978180	MIB1
6:109117107|109171834	OSBPL1A
6:110866624|110892394	TAF4B
6:115954027|115957402	RNF138
6:120911107|120911780	KIAA1328
6:135651327|135659362	ZZZ3
6:135651327|135660627	ZZZ3
6:135651327|135660642	ZZZ3
6:149633393|149666969	ATG4C
6:157293187|157294263	USP24
6:158113662|158125574	MRPL37
6:166989367|167024441	ERI3
6:166989367|167000612	ERI3
6:170449954|170456107	NFYC
2:5782769|5784337	RBM14
2:15967840|15970677	AMBRA1
2:27649122|27650223	HIPK3
2:27989714|28004151	QSER1
2:62307779|62313757	BRD4
2:76582777|76583208	CSNK1G2
2:89359613|89384364	MSH3
2:102535641|102539766	ELL2
2:105133460|105134798	CHD1
2:114358053|114371287	PJA2
2:123076248|123083549	DMXL1
2:129669693|129675119	ALDH7A1
2:136907206|136920524	SEC24A
2:136907206|136933834	SEC24A
2:138308109|138308679	SMAD5
2:138308109|138320744	SMAD5
2:140023010|140031581	FAM13B
2:147170889|147175048	PRELID2
2:147146891|147175048	PRELID2
2:151068704|151069641	HMGXB3
14:9478895|9498411	KCTD9
14:9478895|9505715	KCTD9
14:9497312|9505715	KCTD9
14:9497312|9498411	KCTD9
14:29281864|29290551	ATP6V0A2
14:30929859|30936150	TMEM120B
14:55105293|55105756	ERO1B
14:61389331|61400625	CSGALNACT2
14:71219663|71239477	HERC4
14:71491530|71493586	HNRNPH3
14:71844195|71857332	CCAR1
14:71844195|71853159	CCAR1
14:80294676|80294935	DLG5
14:87557330|87560723	WAPL
14:90510793|90511831	NCOA4
14:103551372|103564282	BTAF1
14:104064308|104070594	IDE
14:105893635|105902806	TBC1D12
14:112705127|112714985	FBXW4
14:112711277|112714985	FBXW4
14:121316588|121320413	PDCD4
14:129676706|129679211	MCMBP
15:4207163|4211249	ACVR2A
15:29932361|29939777	CLASP1
15:48271060|48277942	DDHD2
15:54310541|54312703	PPP2CB
15:59562524|59570339	WDR33
15:60407130|60414442	PRPF40A
15:64771605|64795113	ACVR1
15:77219097|77283482	TLK1
15:77234646|77283482	TLK1
15:77249916|77283482	TLK1
15:77251049|77283482	TLK1
15:91510898|91514202	ZC3H15
15:106074746|106076503	BMPR2
15:106128744|106130023	BMPR2
15:106414678|106431085	CARF
15:106414678|106437731	CARF
15:109323773|109326647	INO80D
15:109428070|109441836	NDUFS1
15:112808098|112896614	KANSL1L
15:112840121|112896614	KANSL1L
15:112895498|112896614	KANSL1L
15:112869863|112896614	KANSL1L
15:128371748|128373809	RHBDD1
15:130875217|130894869	TRIP12
15:133258867|133268029	GIGYF2
9:6361824|6376708	NUP98
9:7476478|7481586	FCHSD2
9:10229873|10258500	UVRAG
9:12155871|12166226	RSF1
9:12162493|12166226	RSF1
9:17351072|17398149	ANKRD42
9:19892116|19913189	PICALM
9:27836847|27837513	CEP57
9:33043520|33045820	BIRC2
9:36698685|36715744	ATM
9:56972613|56973685	ZBTB44
9:66405629|66409132	NUCKS1
9:66405629|66413572	NUCKS1
9:73094595|73102060	VPS50
9:88762439|88764377	POLR1F
9:114937099|114951665	SUCO
9:116218093|116219108	RC3H1
9:124746022|124747461	SMG7
9:127566656|127577646	ODR4
9:131464801|131475251	LPGAT1
8:167697|171693	PCGF3
8:38273589|38287382	SLAIN2
8:69374301|69381214	ANKRD17
8:76607805|76609327	FBXW7
8:80787216|80815987	ARHGAP10
8:82957079|82957656	SMAD1
8:87643220|87644581	NAA15
8:87643220|87664522	NAA15
8:87799383|87820356	ELF2
8:87799386|87820356	ELF2
8:112685624|112686605	SEC24B
8:116014634|116022036	GSTCD
8:116275910|116294261	PPA2
8:120885528|120917407	TRMT10A
8:133838809|133841340	WDFY3
3:4269795|4279580	RNF216
3:4303785|4308978	RNF216
3:7928957|7929871	ZKSCAN1
3:18069859|18071726	MVP
3:18512814|18513266	ATXN2L
3:22810516|22822228	COG7
3:23692700|23704670	METTL9
3:26683193|26685606	SMG1
3:31358570|31359294	ZC3H7A
3:32047943|32085104	CLEC16A
3:38413987|38414699	CREBBP
3:38413987|38450234	CREBBP
3:42001403|42012685	IARS1
3:42881922|42882168	FAM120A
3:42881922|42902838	FAM120A
3:43535845|43536562	ZNF169
3:44102881|44122061	ZC3H6
3:47004817|47007823	STARD7
3:53073338|53077591	CNOT11
3:53231004|53238013	TBC1D8
3:54832393|54850266	REV1
3:69288806|69317475	ALMS1
3:72262638|72270592	TIA1
3:96116880|96124120	PREPL
3:98047438|98064327	EML4
3:101765610|101780247	HNRNPLL
3:102849438|102850385	PRKD3
3:107214187|107229406	BIRC6
3:107198689|107229406	BIRC6
3:107609926|107636043	MEMO1
3:112636837|112653047	SELENOI
3:113127816|113131647	ASXL2
3:113142605|113148454	ASXL2
3:114743498|114755035	ATAD2B
3:125943043|125943717	NOL10
4:2484106|2484734	SLC45A4
4:3108315|3137676	TRAPPC9
4:50433434|50447885	WWP1
4:67679793|67689219	CSPP1
4:67698424|67722071	CSPP1
4:72630918|72643259	CHD7
4:72636561|72643259	CHD7
4:77612564|77618720	RB1CC1
4:77614097|77618720	RB1CC1
4:78124832|78125262	PCMTD1
4:78124832|78139488	PCMTD1
4:79834117|79836538	PRKDC
4:90161231|90163552	COPA
4:90235723|90238988	DCAF8
4:93738637|93747422	CCT3
4:93738637|93749340	CCT3
4:93738637|93750841	CCT3
4:94313136|94324938	ASH1L
4:94405984|94418263	ASH1L
4:94324418|94353369	ASH1L
4:97552286|97576948	SNX27
4:97566524|97576948	SNX27
4:97566524|97595259	SNX27
4:99515003|99537986	RNF115
4:105822618|105823970	CSDE1
4:106122922|106123902	TRIM33
4:117360110|117381169	SLC30A7
4:118211129|118230068	AGL
4:125780952|125783720	ZNF644
4:125783660|125835266	ZNF644
4:125831440|125835266	ZNF644
4:129368386|129385680	SH3GLB1
4:129378277|129385680	SH3GLB1
X:16498488|16513238	RPS6KA3
X:43052047|43052598	GRIPAP1
X:61720719|61735982	ATRX
X:61720719|61746482	ATRX
X:98262075|98263484	NKAP
X:101525185|101536227	STAG2
X:122348586|122354133	MTM1
7:9986990|10000624	RANBP9
7:30619601|30627152	ILRUN
7:43609181|43617387	MMUT
7:52121146|52122358	WHAMM
7:55655839|55658193	IDH2
7:58112449|58117178	PTPN9
7:58112449|58123585	PTPN9
7:58850363|58868520	EDC3
7:64286782|64287500	RALGAPA1
7:65198472|65198799	SNX6
7:67554148|67580251	ARHGAP5
7:67576364|67580251	ARHGAP5
7:68514625|68521235	STRN3
7:68514625|68526660	STRN3
7:68514625|68533985	STRN3
7:77769110|77771399	CHD8
7:92778443|92785790	DCAF5
7:114673750|114675741	BTBD7
7:120464280|120473807	SETD3
5:2637894|2692132	TBC1D22A
5:2675422|2692132	TBC1D22A
5:3717600|3729566	ATXN10
5:6565453|6566862	NDUFA6
5:21267344|21267784	DNAJC14
5:28832466|28858296	TBK1
5:29660599|29663091	LEMD3
5:35635564|35640848	ZFC3H1
5:42538537|42543247	AMN1
5:51444401|51448377	CMAS
5:58079141|58083307	ATF7IP
5:59915033|59916786	DUSP16
5:59915033|59935574	DUSP16
5:60168451|60168844	LRP6
5:60241617|60249461	LRP6
5:67681766|67688990	KDM5A
5:68106936|68113748	WNK1
5:68310430|68329034	ERC1
5:68321653|68362580	ERC1
5:69698164|69699221	CECR2
5:85285642|85286475	SLC25A3
5:88040453|88064420	VEZT
5:88253163|88273584	NR2C1
16:34633974|34639666	PLPP1
16:36278273|36285749	GPBP1
16:40231897|40253338	ZSWIM6
16:40251241|40253338	ZSWIM6
16:44484459|44506007	ERBIN
16:44513270|44525240	ERBIN
16:44513270|44517349	ERBIN
16:50437615|50446698	CPEB4
16:69126081|69133446	FAM114A2
11:458635|468238	MPHOSPH8
11:543480|562934	PSPC1
11:552302|562934	PSPC1
11:534135|562934	PSPC1
11:603753|604571	ZMYM5
11:675689|683082	ZMYM2
11:675689|686516	ZMYM2
11:1141224|1141776	XPO4
11:1141224|1163643	XPO4
11:3208399|3208876	MTMR6
11:4104218|4118265	CDK8
11:5503065|5507316	PAN3
11:50762620|50773425	OBI1
11:51531489|51534900	NDFIP2
11:51531489|51540684	NDFIP2
11:78382356|78383968	ATP11A
11:78349882|78356609	ATP11A
10:8265577|8271193	RRP15
10:20469603|20492105	DENND1B
10:24795546|24799565	KDM5B
10:29037750|29038934	TUT7
10:29228248|29230143	NAA35
10:32569928|32576571	UBAP1
10:32800584|32827084	UBAP2
10:53169687|53202893	MLLT10
10:59913525|59919743	UPF2
10:65179075|65191886	GDI2
10:68491183|68518239	WDR37
10:69201376|69235186	ZMYND11
10:69212794|69235186	ZMYND11
17:37852424|37854328	ITCH
17:38986014|38991291	CPNE1
17:49278762|49281294	ZMYND8
17:50914046|50914419	DDX27
17:58635283|58643708	VAPB
17:63033432|63044659	PCMTD2
12:573171|585916	FOXK2
12:5471981|5473179	ACOX1
12:11669306|11671052	PRKAR1A
12:11669306|11672541	PRKAR1A
12:16209070|16211961	TLK2
12:16953323|16954694	KANSL1
12:20126112|20136260	EZH1
12:27298750|27312593	SPAG9
12:37509450|37517080	PPM1D
12:38103106|38109151	GGNBP2
12:42587230|42596350	ZNF207
12:42589975|42596350	ZNF207
12:43673069|43691261	NF1
12:48687199|48712536	PAFAH1B1
12:51636713|51680596	RABEP1
12:55430702|55432293	ADPRM
12:60348042|60376920	SLC5A10
12:60366858|60376920	SLC5A10
12:60370050|60376920	SLC5A10
18:1475203|1481335	DNAJB6
18:1875193|1881411	LMBR1
18:5103837|5109435	KMT2C
18:9065917|9084316	BRAF
18:33663765|33673693	DOCK4
18:38309526|38320787	HERPUD2
18:44885414|44903054	TAX1BP1
18:44996263|45011080	HIBADH
18:54393586|54404485	CDK13
AEMK02000452.1:1677528|1679425	CDC42BPB
AEMK02000452.1:2035285|2045203	MARK3
AEMK02000452.1:2281177|2295643	PPP1R13B
AEMK02000452.1:3325019|3327814	BRF1
AEMK02000682.1:315438|318832	EHMT1
AEMK02000510.1:631357|631791	TNRC6A
AEMK02000510.1:631357|663972	TNRC6A

## Sheet: Table S6
Table S6.GO enrichment of housekeeping circRNA's parental genes
ID	ONTOLOGY	Description	GeneRatio	BgRatio	pvalue	p.adjust	qvalue	geneID	Count
GO:0006338	BP	chromatin remodeling	24/349	373/18903	1.29334e-07	0.000440383	0.000399166	ARID1B/KDM5B/EZH1/PPM1D/SMARCC1/TASOR/TET1/BTAF1/BAZ2B/BRD4/CHD1/CHD7/ATF7IP/KDM5A/CECR2/CFDP1/CHD9/SMCHD1/BICRAL/CHD8/RSF1/ATRX/MPHOSPH8/INO80D	24
GO:0000956	BP	nuclear-transcribed mRNA catabolic process	13/349	125/18903	5.52487e-07	0.000940609	0.000852575	TUT7/UPF2/PAN3/DHX36/SMG1/CNOT11/CSDE1/AGO1/EDC3/ATM/RC3H1/SMG7/TNRC6A	13
GO:0046329	BP	negative regulation of JNK cascade	7/349	39/18903	6.36988e-06	0.00536655	0.00486428	ZMYND11/PAFAH1B1/PDCD4/ITCH/HIPK3/DUSP16/CYLD	7
GO:0006479	BP	protein methylation	15/349	208/18903	7.88039e-06	0.00536655	0.00486428	SMAD4/KANSL1/EZH1/TET1/PCMTD2/KMT2C/BRD4/METTL9/CREBBP/PCMTD1/ASH1L/NFYC/SETD3/EHMT1/ATRX	15
GO:0008213	BP	protein alkylation	15/349	208/18903	7.88039e-06	0.00536655	0.00486428	SMAD4/KANSL1/EZH1/TET1/PCMTD2/KMT2C/BRD4/METTL9/CREBBP/PCMTD1/ASH1L/NFYC/SETD3/EHMT1/ATRX	15
GO:0018105	BP	peptidyl-serine phosphorylation	18/349	313/18903	2.27493e-05	0.0129102	0.0117019	MAPKAP1/TLK2/GGNBP2/RAF1/PAK2/DYRK1A/TLK1/BRAF/HIPK2/HIPK3/SMG1/PRKDC/TBK1/WNK1/ATM/MARK3/RPS6KA3/CSNK1G2	18
GO:0043414	BP	macromolecule methylation	19/349	348/18903	2.77307e-05	0.013489	0.0122265	SMAD4/KANSL1/EZH1/PPM1D/TET1/PCMTD2/KMT2C/BRD4/METTL9/CREBBP/PCMTD1/ASH1L/ATF7IP/NFYC/SETD3/EHMT1/ATRX/MPHOSPH8/TRMT10A	19
GO:0032873	BP	negative regulation of stress-activated MAPK cascade	7/349	51/18903	3.96526e-05	0.0150019	0.0135978	ZMYND11/PAFAH1B1/PDCD4/ITCH/HIPK3/DUSP16/CYLD	7
GO:0070303	BP	negative regulation of stress-activated protein kinase signaling cascade	7/349	51/18903	3.96526e-05	0.0150019	0.0135978	ZMYND11/PAFAH1B1/PDCD4/ITCH/HIPK3/DUSP16/CYLD	7
GO:0018209	BP	peptidyl-serine modification	18/349	332/18903	4.92738e-05	0.0167777	0.0152075	MAPKAP1/TLK2/GGNBP2/RAF1/PAK2/DYRK1A/TLK1/BRAF/HIPK2/HIPK3/SMG1/PRKDC/TBK1/WNK1/ATM/MARK3/RPS6KA3/CSNK1G2	18
GO:0016197	BP	endosomal transport	15/349	247/18903	5.90299e-05	0.0172392	0.0156258	SNX9/DENND1B/UBAP1/SPAG9/CLEC16A/ALMS1/PREPL/SNX27/EVI5/ERC1/SNX6/PICALM/VPS50/GRIPAP1/SNX30	15
GO:0046328	BP	regulation of JNK cascade	11/349	141/18903	6.29728e-05	0.0172392	0.0156258	IGF1R/ZMYND11/PAFAH1B1/PDCD4/ITCH/HIPK2/HIPK3/RB1CC1/DUSP16/CYLD/PJA2	11
GO:0016571	BP	histone methylation	12/349	167/18903	6.5818e-05	0.0172392	0.0156258	SMAD4/KANSL1/EZH1/TET1/KMT2C/BRD4/CREBBP/ASH1L/NFYC/SETD3/EHMT1/ATRX	12
GO:0140694	BP	non-membrane-bounded organelle assembly	19/349	386/18903	0.000110749	0.026084	0.0236427	SMAD4/TMOD3/PAN3/PRKAR1A/ZNF207/TASOR/CEP63/CLASP1/RBM14/ATXN2L/ALMS1/TIA1/PRKDC/CSDE1/LSM14A/EDC3/RC3H1/STAG2/RPF2	19
GO:0032259	BP	methylation	19/349	390/18903	0.000126609	0.026084	0.0236427	SMAD4/KANSL1/EZH1/PPM1D/TET1/PCMTD2/KMT2C/BRD4/METTL9/CREBBP/PCMTD1/ASH1L/ATF7IP/NFYC/SETD3/EHMT1/ATRX/MPHOSPH8/TRMT10A	19
GO:1902275	BP	regulation of chromatin organization	6/349	43/18903	0.00012996	0.026084	0.0236427	TLK2/TASOR/TET1/TLK1/ATF7IP/MPHOSPH8	6
GO:0043409	BP	negative regulation of MAPK cascade	12/349	181/18903	0.000141908	0.026084	0.0236427	SMAD4/IGF1R/ZMYND11/NF1/PAFAH1B1/PDCD4/ITCH/HIPK3/ASH1L/DUSP16/CYLD/RANBP9	12
GO:0034968	BP	histone lysine methylation	10/349	130/18903	0.000151802	0.026084	0.0236427	SMAD4/KANSL1/EZH1/KMT2C/BRD4/ASH1L/NFYC/SETD3/EHMT1/ATRX	10
GO:0031331	BP	positive regulation of cellular catabolic process	20/349	429/18903	0.000152661	0.026084	0.0236427	SNX9/PIAS1/TUT7/PAN3/DHX36/GIGYF2/ITCH/AMBRA1/CNOT11/RB1CC1/CSDE1/SH3GLB1/TBK1/ZC3H18/FBXW7/UVRAG/ATM/RC3H1/TNRC6A/SNX30	20
GO:2001252	BP	positive regulation of chromosome organization	9/349	106/18903	0.00015321	0.026084	0.0236427	GNL3/TASOR/DHX36/CCT3/ATF7IP/ATM/ATRX/MPHOSPH8/INO80D	9
GO:0050779	BP	RNA destabilization	9/349	107/18903	0.000164609	0.0266901	0.0241921	TUT7/PAN3/DHX36/GIGYF2/CNOT11/CSDE1/ZC3H18/RC3H1/TNRC6A	9
GO:0006402	BP	mRNA catabolic process	14/349	248/18903	0.000222177	0.0334317	0.0303027	TUT7/UPF2/PAN3/DHX36/GIGYF2/SMG1/CNOT11/CSDE1/AGO1/EDC3/ATM/RC3H1/SMG7/TNRC6A	14
GO:0043087	BP	regulation of GTPase activity	18/349	376/18903	0.000235145	0.0334317	0.0303027	AFDN/SNX9/RABGAP1/DENND1B/LRCH1/NF1/PAFAH1B1/TBC1D12/ZC3H15/TBC1D8/EVI5/SYDE2/TBC1D22A/WNK1/MMUT/RALGAPA1/PICALM/MYO9A	18
GO:0000288	BP	nuclear-transcribed mRNA catabolic process, deadenylation-dependent decay	7/349	68/18903	0.000253943	0.0334317	0.0303027	TUT7/PAN3/DHX36/CNOT11/CSDE1/RC3H1/TNRC6A	7
GO:0033044	BP	regulation of chromosome organization	14/349	252/18903	0.000261783	0.0334317	0.0303027	ARID1B/ZNF207/SMARCC1/GNL3/TASOR/DHX36/SMG1/CCT3/ATF7IP/ATM/ATRX/MPHOSPH8/WAPL/INO80D	14
GO:0043547	BP	positive regulation of GTPase activity	15/349	283/18903	0.000264749	0.0334317	0.0303027	AFDN/SNX9/RABGAP1/DENND1B/NF1/TBC1D12/ZC3H15/TBC1D8/EVI5/SYDE2/TBC1D22A/MMUT/RALGAPA1/PICALM/MYO9A	15
GO:1903313	BP	positive regulation of mRNA metabolic process	10/349	140/18903	0.000277967	0.0334317	0.0303027	TUT7/PAN3/DHX36/GIGYF2/CNOT11/CSDE1/NUDT21/NUP98/RC3H1/TNRC6A	10
GO:0032872	BP	regulation of stress-activated MAPK cascade	12/349	195/18903	0.000283468	0.0334317	0.0303027	IGF1R/ZMYND11/PAFAH1B1/PDCD4/ITCH/HIPK2/HIPK3/RB1CC1/DUSP16/CYLD/PJA2/MAP2K1	12
GO:0090308	BP	regulation of DNA methylation-dependent heterochromatin formation	4/349	18/18903	0.000284734	0.0334317	0.0303027	TASOR/TET1/ATF7IP/MPHOSPH8	4
GO:0070302	BP	regulation of stress-activated protein kinase signaling cascade	12/349	198/18903	0.00032588	0.0369874	0.0335256	IGF1R/ZMYND11/PAFAH1B1/PDCD4/ITCH/HIPK2/HIPK3/RB1CC1/DUSP16/CYLD/PJA2/MAP2K1	12
GO:0018022	BP	peptidyl-lysine methylation	10/349	144/18903	0.000348551	0.0382843	0.0347012	SMAD4/KANSL1/EZH1/KMT2C/BRD4/ASH1L/NFYC/SETD3/EHMT1/ATRX	10
GO:0007254	BP	JNK cascade	11/349	172/18903	0.000363812	0.0387119	0.0350888	IGF1R/ZMYND11/PAFAH1B1/PDCD4/ITCH/HIPK2/HIPK3/RB1CC1/DUSP16/CYLD/PJA2	11
GO:0006401	BP	RNA catabolic process	15/349	299/18903	0.00047329	0.0488349	0.0442643	TUT7/UPF2/PAN3/DHX36/GIGYF2/SMG1/CNOT11/CSDE1/ZC3H18/AGO1/EDC3/ATM/RC3H1/SMG7/TNRC6A	15
GO:0036464	CC	cytoplasmic ribonucleoprotein granule	16/355	248/19869	1.08012e-05	0.00337396	0.00297538	UBAP2/UPF2/PAN3/DHX36/GIGYF2/HIPK2/ATXN2L/SMG1/TIA1/STAU2/CSDE1/LSM14A/AGO1/EDC3/RC3H1/TNRC6A	16
GO:0010494	CC	cytoplasmic stress granule	9/355	84/19869	1.89897e-05	0.00337396	0.00297538	DHX36/GIGYF2/HIPK2/ATXN2L/TIA1/STAU2/CSDE1/LSM14A/RC3H1	9
GO:0035770	CC	ribonucleoprotein granule	16/355	265/19869	2.45082e-05	0.00337396	0.00297538	UBAP2/UPF2/PAN3/DHX36/GIGYF2/HIPK2/ATXN2L/SMG1/TIA1/STAU2/CSDE1/LSM14A/AGO1/EDC3/RC3H1/TNRC6A	16
GO:0005819	CC	spindle	20/355	426/19869	9.03035e-05	0.00932384	0.00822237	PTP4A1/INVS/ZNF207/PAFAH1B1/CEP63/TTC28/CLASP1/PPP2CB/ALMS1/EML4/BIRC6/CSPP1/EVI5/CYLD/LSM14A/ZZZ3/ATM/STAG2/PARP4/WAPL	20
GO:1902911	CC	protein kinase complex	10/355	136/19869	0.000169403	0.0139927	0.0123396	IGF1R/PRKAR1A/ACVR2A/ACVR1/CDK13/RB1CC1/PRKDC/TBK1/ERC1/PHKB	10
GO:0098687	CC	chromosomal region	18/355	388/19869	0.000233198	0.0160518	0.0141556	KANSL1/EZH1/ZNF207/PAFAH1B1/SMARCC1/SEC13/DHX36/CLASP1/PPP2CB/PRKDC/CFDP1/SMCHD1/NUP98/UVRAG/ATM/ATRX/STAG2/WAPL	18
GO:1902554	CC	serine/threonine protein kinase complex	9/355	122/19869	0.000347768	0.0179829	0.0158585	PRKAR1A/ACVR2A/ACVR1/CDK13/RB1CC1/PRKDC/TBK1/ERC1/PHKB	9
GO:0000932	CC	P-body	8/355	97/19869	0.000348338	0.0179829	0.0158585	UBAP2/PAN3/CSDE1/LSM14A/AGO1/EDC3/RC3H1/TNRC6A	8
GO:0016607	CC	nuclear speck	18/355	419/19869	0.000581883	0.0223089	0.0196734	AFDN/PIAS1/DENND1B/PSPC1/DHX36/RSRC1/DYRK1A/PRPF40A/TRIP12/ERBIN/CDK13/RBM14/ATXN2L/ZC3H18/S100PBP/CDYL/PNISR/ILRUN	18
GO:0000775	CC	chromosome, centromeric region	13/355	250/19869	0.000594002	0.0223089	0.0196734	KANSL1/ZNF207/PAFAH1B1/SMARCC1/SEC13/CLASP1/PPP2CB/CFDP1/NUP98/UVRAG/ATRX/STAG2/WAPL	13
GO:0016605	CC	PML body	8/355	105/19869	0.000594184	0.0223089	0.0196734	RNF111/PIAS1/ZMYM2/HIPK2/HIPK3/NR2C1/WDFY3/ATRX	8
GO:0035097	CC	histone methyltransferase complex	6/355	62/19869	0.000825705	0.028418	0.0250609	MGA/TEX10/KANSL1/EZH1/KMT2C/CHD8	6
GO:0005776	CC	autophagosome	8/355	115/19869	0.00108102	0.0339179	0.029911	RUBCNL/NCOA4/TBC1D12/AMBRA1/RB1CC1/SH3GLB1/WDFY3/UVRAG	8
GO:0070603	CC	SWI/SNF superfamily-type complex	7/355	90/19869	0.00114976	0.0339179	0.029911	ARID1B/SMARCC1/CECR2/CFDP1/BICRAL/RSF1/INO80D	7
GO:1990124	CC	messenger ribonucleoprotein complex	3/355	13/19869	0.00141592	0.0382701	0.0337491	CPEB4/STAU2/LSM14A	3
GO:1904949	CC	ATPase complex	7/355	94/19869	0.00148262	0.0382701	0.0337491	ARID1B/SMARCC1/CECR2/CFDP1/BICRAL/RSF1/INO80D	7
GO:0000803	CC	sex chromosome	4/355	31/19869	0.00215338	0.0455569	0.0401751	SMARCC1/SMCHD1/BIRC2/PCGF3	4
GO:0071339	CC	MLL1 complex	4/355	31/19869	0.00215338	0.0455569	0.0401751	MGA/TEX10/KANSL1/CHD8	4
GO:0030127	CC	COPII vesicle coat	3/355	15/19869	0.00219366	0.0455569	0.0401751	SEC13/SEC24A/SEC24B	3
GO:0000421	CC	autophagosome membrane	5/355	52/19869	0.00231146	0.0455569	0.0401751	RUBCNL/RB1CC1/SH3GLB1/WDFY3/UVRAG	5
GO:0016234	CC	inclusion body	6/355	76/19869	0.00238414	0.0455569	0.0401751	CPNE1/AGL/WDFY3/NUP98/PICALM/GYS1	6
GO:0044665	CC	MLL1/2 complex	4/355	32/19869	0.00242676	0.0455569	0.0401751	MGA/TEX10/KANSL1/CHD8	4
GO:0061695	CC	transferase complex, transferring phosphorus-containing groups	13/355	295/19869	0.00262926	0.0472124	0.041635	IGF1R/PRKAR1A/ACVR2A/ACVR1/CDK13/RB1CC1/PRKDC/TBK1/ERC1/PHKB/TAF4B/UVRAG/POLR1F	13
GO:0004674	MF	protein serine/threonine kinase activity	29/351	430/18432	4.17989e-09	2.33238e-06	2.07674e-06	MAPK6/TRPM7/EIF2AK4/CDK8/TLK2/PPM1D/RAF1/PAK2/DYRK1A/ACVR2A/ACVR1/TLK1/BMPR2/BRAF/HIPK2/CDK13/HIPK3/BRD4/SMG1/PRKD3/PRKDC/TBK1/WNK1/ATM/CDC42BPB/MARK3/RPS6KA3/CSNK1G2/MAP2K1	29
GO:0042393	MF	histone binding	20/351	258/18432	1.23387e-07	2.04139e-05	1.81765e-05	PHIP/KDM5B/MLLT10/ZMYND11/EZH1/SMARCC1/PHC3/ZMYND8/KMT2C/BRD4/CHD1/ATAD2B/CHD7/KDM5A/ZZZ3/CDYL/CHD8/RSF1/ATRX/MPHOSPH8	20
GO:0106310	MF	protein serine kinase activity	24/351	363/18432	1.37255e-07	2.04139e-05	1.81765e-05	MAPK6/TRPM7/EIF2AK4/CDK8/TLK2/RAF1/PAK2/DYRK1A/TLK1/BRAF/HIPK2/CDK13/HIPK3/SMG1/PRKD3/PRKDC/TBK1/WNK1/ATM/CDC42BPB/MARK3/RPS6KA3/CSNK1G2/MAP2K1	24
GO:0140658	MF	ATP-dependent chromatin remodeler activity	8/351	33/18432	1.46336e-07	2.04139e-05	1.81765e-05	BTAF1/CHD1/CHD7/CECR2/CHD9/CHD8/RSF1/ATRX	8
GO:0140030	MF	modification-dependent protein binding	14/351	172/18432	5.58163e-06	0.00062291	0.000554638	PHIP/ZMYND11/IDE/ZMYND8/BRD4/CHD1/ATAD2B/AGL/KDM5A/ZZZ3/CDYL/CHD8/ATRX/MPHOSPH8	14
GO:0035064	MF	methylated histone binding	9/351	80/18432	2.09791e-05	0.00167233	0.00148904	ZMYND11/ZMYND8/CHD1/KDM5A/ZZZ3/CDYL/CHD8/ATRX/MPHOSPH8	9
GO:0140034	MF	methylation-dependent protein binding	9/351	80/18432	2.09791e-05	0.00167233	0.00148904	ZMYND11/ZMYND8/CHD1/KDM5A/ZZZ3/CDYL/CHD8/ATRX/MPHOSPH8	9
GO:0070577	MF	lysine-acetylated histone binding	5/351	23/18432	6.17458e-05	0.0037515	0.00334033	PHIP/ZMYND8/BRD4/ATAD2B/ZZZ3	5
GO:0140033	MF	acetylation-dependent protein binding	5/351	23/18432	6.17458e-05	0.0037515	0.00334033	PHIP/ZMYND8/BRD4/ATAD2B/ZZZ3	5
GO:0051020	MF	GTPase binding	17/351	303/18432	7.59977e-05	0.0037515	0.00334033	AFDN/RABGAP1/MAPKAP1/DENND1B/GDI2/GOLGA4/PAK2/DOCK4/AMBRA1/IARS1/EVI5/ERC1/RANBP9/WHAMM/STRN3/PICALM/CDC42BPB	17
GO:0005096	MF	GTPase activator activity	16/351	275/18432	8.05916e-05	0.0037515	0.00334033	RABGAP1/GDI2/NF1/TBC1D12/DOCK4/FAM13B/TBC1D8/EVI5/SYDE2/TBC1D22A/RALGAPA1/ARHGAP5/ARHGAP10/FAM13A/MYO9A/RABEP1	16
GO:0008353	MF	RNA polymerase II CTD heptapeptide repeat kinase activity	4/351	13/18432	8.06775e-05	0.0037515	0.00334033	CDK8/DYRK1A/CDK13/BRD4	4
GO:0003713	MF	transcription coactivator activity	16/351	281/18432	0.000103708	0.00428228	0.00381294	ARID1B/SMARCC1/DYRK1A/CCAR1/NCOA4/PER2/KMT2C/HIPK2/RBM14/BRD4/CREBBP/KDM5A/SETD3/NUP98/BIRC2/NUCKS1	16
GO:0008094	MF	ATP-dependent activity, acting on DNA	10/351	121/18432	0.000107441	0.00428228	0.00381294	DHX36/BTAF1/MSH3/CHD1/CHD7/CECR2/CHD9/CHD8/RSF1/ATRX	10
GO:0031267	MF	small GTPase binding	15/351	272/18432	0.000240046	0.00892972	0.007951	AFDN/RABGAP1/MAPKAP1/DENND1B/GDI2/GOLGA4/PAK2/DOCK4/EVI5/ERC1/RANBP9/WHAMM/STRN3/PICALM/CDC42BPB	15
GO:0008276	MF	protein methyltransferase activity	8/351	92/18432	0.000370105	0.0129074	0.0114927	EZH1/PCMTD2/KMT2C/METTL9/PCMTD1/ASH1L/SETD3/EHMT1	8
GO:0046332	MF	SMAD binding	7/351	78/18432	0.000709137	0.0230598	0.0205324	SMAD4/RNF111/ACVR1/HIPK2/SMAD5/TRIM33/SMAD1	7
GO:0017002	MF	activin receptor activity	3/351	10/18432	0.000743863	0.0230598	0.0205324	ACVR2A/ACVR1/BMPR2	3
GO:0003714	MF	transcription corepressor activity	11/351	191/18432	0.00112047	0.0329066	0.0292999	PIAS1/KDM5B/ZMYND11/EZH1/CCAR1/ZMYND8/HIPK2/CREBBP/ATF7IP/SPEN/CDYL	11
GO:0018024	MF	histone-lysine N-methyltransferase activity	5/351	43/18432	0.00129338	0.0360853	0.0321303	EZH1/KMT2C/ASH1L/SETD3/EHMT1	5
GO:0019787	MF	ubiquitin-like protein transferase activity	19/351	465/18432	0.0015722	0.0417756	0.0371969	C18orf25/RNF111/PIAS1/OBI1/TTC3/HERC4/TRIP12/ITCH/RNF216/BIRC6/WWP1/RNF115/TRIM33/MIB1/RNF138/BIRC2/RC3H1/PJA2/UBE4B	19
GO:0045296	MF	cadherin binding	15/351	333/18432	0.00190038	0.0482005	0.0429176	AFDN/SNX9/TMOD3/USP8/UBAP2/PAK2/ACVR1/ZC3H15/BMPR2/GIGYF2/VAPB/ATXN2L/SH3GLB1/ERC1/PICALM	15
GO:0004842	MF	ubiquitin-protein transferase activity	18/351	441/18432	0.00209463	0.049574	0.0441406	C18orf25/RNF111/OBI1/TTC3/HERC4/TRIP12/ITCH/RNF216/BIRC6/WWP1/RNF115/TRIM33/MIB1/RNF138/BIRC2/RC3H1/PJA2/UBE4B	18
GO:0070411	MF	I-SMAD binding	3/351	14/18432	0.00213222	0.049574	0.0441406	SMAD4/SMAD5/SMAD1	3

## Sheet: Table S7
Table S7.GO enrichment of tissue-specific circRNA's parental genes
ID	ONTOLOGY	Description	GeneRatio	BgRatio	pvalue	p.adjust	qvalue	geneID	Count	Tissue
GO:0010232	BP	vascular transport	2023-02-03	87/18903	6.2632e-05	0.00429731	0.0006674	SLC4A4/SLC5A1	2	Gallbladder
GO:0150104	BP	transport across blood-brain barrier	2023-02-03	87/18903	6.2632e-05	0.00429731	0.0006674	SLC4A4/SLC5A1	2	Gallbladder
GO:1904659	BP	glucose transmembrane transport	2023-02-03	113/18903	0.000105846	0.00429731	0.0006674	GPC3/SLC5A1	2	Gallbladder
GO:0008645	BP	hexose transmembrane transport	2023-02-03	116/18903	0.000111555	0.00429731	0.0006674	GPC3/SLC5A1	2	Gallbladder
GO:0015749	BP	monosaccharide transmembrane transport	2023-02-03	119/18903	0.000117413	0.00429731	0.0006674	GPC3/SLC5A1	2	Gallbladder
GO:0034219	BP	carbohydrate transmembrane transport	2023-02-03	132/18903	0.000144521	0.0044079	0.000684575	GPC3/SLC5A1	2	Gallbladder
GO:0008643	BP	carbohydrate transport	2023-02-03	156/18903	0.000201917	0.0052787	0.000819815	GPC3/SLC5A1	2	Gallbladder
GO:0035725	BP	sodium ion transmembrane transport	2023-02-03	184/18903	0.000280902	0.00642563	0.000997941	SLC4A4/SLC5A1	2	Gallbladder
GO:0006814	BP	sodium ion transport	2023-02-03	255/18903	0.000538969	0.010959	0.00170201	SLC4A4/SLC5A1	2	Gallbladder
GO:0003018	BP	vascular process in circulatory system	2023-02-03	270/18903	0.000604052	0.0110541	0.00171678	SLC4A4/SLC5A1	2	Gallbladder
GO:0042045	BP	epithelial fluid transport	2023-01-03	10/18903	0.00158629	0.024191	0.00375701	SLC5A1	1	Gallbladder
GO:0072203	BP	cell proliferation involved in metanephros development	2023-01-03	10/18903	0.00158629	0.024191	0.00375701	GPC3	1	Gallbladder
GO:0072178	BP	nephric duct morphogenesis	2023-01-03	12/18903	0.00190335	0.0257955	0.00400621	GPC3	1	Gallbladder
GO:0042074	BP	cell migration involved in gastrulation	2023-01-03	15/18903	0.00237881	0.0257955	0.00400621	GPC3	1	Gallbladder
GO:2000052	BP	positive regulation of non-canonical Wnt signaling pathway	2023-01-03	15/18903	0.00237881	0.0257955	0.00400621	GPC3	1	Gallbladder
GO:0036376	BP	sodium ion export across plasma membrane	2023-01-03	16/18903	0.00253726	0.0257955	0.00400621	SLC4A4	1	Gallbladder
GO:0072176	BP	nephric duct development	2023-01-03	16/18903	0.00253726	0.0257955	0.00400621	GPC3	1	Gallbladder
GO:2000095	BP	regulation of Wnt signaling pathway, planar cell polarity pathway	2023-01-03	16/18903	0.00253726	0.0257955	0.00400621	GPC3	1	Gallbladder
GO:0045821	BP	positive regulation of glycolytic process	2023-01-03	21/18903	0.00332928	0.0319118	0.00495611	SLC4A4	1	Gallbladder
GO:0072111	BP	cell proliferation involved in kidney development	2023-01-03	22/18903	0.00348763	0.0319118	0.00495611	GPC3	1	Gallbladder
GO:0006833	BP	water transport	2023-01-03	25/18903	0.00396259	0.0325014	0.00504767	SLC5A1	1	Gallbladder
GO:0098719	BP	sodium ion import across plasma membrane	2023-01-03	25/18903	0.00396259	0.0325014	0.00504767	SLC5A1	1	Gallbladder
GO:2000050	BP	regulation of non-canonical Wnt signaling pathway	2023-01-03	26/18903	0.00412087	0.0325014	0.00504767	GPC3	1	Gallbladder
GO:0035116	BP	embryonic hindlimb morphogenesis	2023-01-03	28/18903	0.00443739	0.0325014	0.00504767	GPC3	1	Gallbladder
GO:0015701	BP	bicarbonate transport	2023-01-03	29/18903	0.00459563	0.0325014	0.00504767	SLC4A4	1	Gallbladder
GO:0070293	BP	renal absorption	2023-01-03	30/18903	0.00475385	0.0325014	0.00504767	SLC5A1	1	Gallbladder
GO:0045879	BP	negative regulation of smoothened signaling pathway	2023-01-03	33/18903	0.0052284	0.0325014	0.00504767	GPC3	1	Gallbladder
GO:0070633	BP	transepithelial transport	2023-01-03	33/18903	0.0052284	0.0325014	0.00504767	SLC5A1	1	Gallbladder
GO:0042044	BP	fluid transport	2023-01-03	34/18903	0.00538655	0.0325014	0.00504767	SLC5A1	1	Gallbladder
GO:0035137	BP	hindlimb morphogenesis	2023-01-03	35/18903	0.00554469	0.0325014	0.00504767	GPC3	1	Gallbladder
GO:1903580	BP	positive regulation of ATP metabolic process	2023-01-03	36/18903	0.00570281	0.0325014	0.00504767	SLC4A4	1	Gallbladder
GO:0045880	BP	positive regulation of smoothened signaling pathway	2023-01-03	37/18903	0.00586091	0.0325014	0.00504767	GPC3	1	Gallbladder
GO:0046326	BP	positive regulation of glucose import	2023-01-03	37/18903	0.00586091	0.0325014	0.00504767	GPC3	1	Gallbladder
GO:0030513	BP	positive regulation of BMP signaling pathway	2023-01-03	41/18903	0.00649314	0.0331095	0.00514212	GPC3	1	Gallbladder
GO:0010463	BP	mesenchymal cell proliferation	2023-01-03	42/18903	0.00665116	0.0331095	0.00514212	GPC3	1	Gallbladder
GO:0050892	BP	intestinal absorption	2023-01-03	42/18903	0.00665116	0.0331095	0.00514212	SLC5A1	1	Gallbladder
GO:0010828	BP	positive regulation of glucose transmembrane transport	2023-01-03	44/18903	0.00696714	0.0331095	0.00514212	GPC3	1	Gallbladder
GO:0006110	BP	regulation of glycolytic process	2023-01-03	47/18903	0.007441	0.0331095	0.00514212	SLC4A4	1	Gallbladder
GO:0010171	BP	body morphogenesis	2023-01-03	48/18903	0.00759891	0.0331095	0.00514212	GPC3	1	Gallbladder
GO:0045981	BP	positive regulation of nucleotide metabolic process	2023-01-03	48/18903	0.00759891	0.0331095	0.00514212	SLC4A4	1	Gallbladder
GO:0060976	BP	coronary vasculature development	2023-01-03	48/18903	0.00759891	0.0331095	0.00514212	GPC3	1	Gallbladder
GO:1900544	BP	positive regulation of purine nucleotide metabolic process	2023-01-03	48/18903	0.00759891	0.0331095	0.00514212	SLC4A4	1	Gallbladder
GO:0060071	BP	Wnt signaling pathway, planar cell polarity pathway	2023-01-03	53/18903	0.00838824	0.0341369	0.00530167	GPC3	1	Gallbladder
GO:0043470	BP	regulation of carbohydrate catabolic process	2023-01-03	56/18903	0.00886164	0.0341369	0.00530167	SLC4A4	1	Gallbladder
GO:0090175	BP	regulation of establishment of planar polarity	2023-01-03	57/18903	0.00901941	0.0341369	0.00530167	GPC3	1	Gallbladder
GO:0009948	BP	anterior/posterior axis specification	2023-01-03	58/18903	0.00917716	0.0341369	0.00530167	GPC3	1	Gallbladder
GO:0046324	BP	regulation of glucose import	2023-01-03	59/18903	0.00933489	0.0341369	0.00530167	GPC3	1	Gallbladder
GO:0001658	BP	branching involved in ureteric bud morphogenesis	2023-01-03	60/18903	0.00949261	0.0341369	0.00530167	GPC3	1	Gallbladder
GO:0060675	BP	ureteric bud morphogenesis	2023-01-03	66/18903	0.0104385	0.0341369	0.00530167	GPC3	1	Gallbladder
GO:0072171	BP	mesonephric tubule morphogenesis	2023-01-03	67/18903	0.0105961	0.0341369	0.00530167	GPC3	1	Gallbladder
GO:0035567	BP	non-canonical Wnt signaling pathway	2023-01-03	72/18903	0.0113839	0.0341369	0.00530167	GPC3	1	Gallbladder
GO:1903578	BP	regulation of ATP metabolic process	2023-01-03	73/18903	0.0115414	0.0341369	0.00530167	SLC4A4	1	Gallbladder
GO:0001736	BP	establishment of planar polarity	2023-01-03	74/18903	0.0116989	0.0341369	0.00530167	GPC3	1	Gallbladder
GO:0007164	BP	establishment of tissue polarity	2023-01-03	74/18903	0.0116989	0.0341369	0.00530167	GPC3	1	Gallbladder
GO:0046323	BP	glucose import	2023-01-03	75/18903	0.0118563	0.0341369	0.00530167	GPC3	1	Gallbladder
GO:0072078	BP	nephron tubule morphogenesis	2023-01-03	75/18903	0.0118563	0.0341369	0.00530167	GPC3	1	Gallbladder
GO:0010827	BP	regulation of glucose transmembrane transport	2023-01-03	77/18903	0.0121712	0.0341369	0.00530167	GPC3	1	Gallbladder
GO:0072088	BP	nephron epithelium morphogenesis	2023-01-03	77/18903	0.0121712	0.0341369	0.00530167	GPC3	1	Gallbladder
GO:0045913	BP	positive regulation of carbohydrate metabolic process	2023-01-03	78/18903	0.0123286	0.0341369	0.00530167	SLC4A4	1	Gallbladder
GO:0140115	BP	export across plasma membrane	2023-01-03	78/18903	0.0123286	0.0341369	0.00530167	SLC4A4	1	Gallbladder
GO:1901264	BP	carbohydrate derivative transport	2023-01-03	78/18903	0.0123286	0.0341369	0.00530167	SLC5A1	1	Gallbladder
GO:0061333	BP	renal tubule morphogenesis	2023-01-03	79/18903	0.012486	0.0341369	0.00530167	GPC3	1	Gallbladder
GO:0072028	BP	nephron morphogenesis	2023-01-03	80/18903	0.0126434	0.0341369	0.00530167	GPC3	1	Gallbladder
GO:0006096	BP	glycolytic process	2023-01-03	83/18903	0.0131154	0.0341369	0.00530167	SLC4A4	1	Gallbladder
GO:0006757	BP	ATP generation from ADP	2023-01-03	84/18903	0.0132728	0.0341369	0.00530167	SLC4A4	1	Gallbladder
GO:0008589	BP	regulation of smoothened signaling pathway	2023-01-03	84/18903	0.0132728	0.0341369	0.00530167	GPC3	1	Gallbladder
GO:0051453	BP	regulation of intracellular pH	2023-01-03	85/18903	0.0134301	0.0341369	0.00530167	SLC4A4	1	Gallbladder
GO:0030641	BP	regulation of cellular pH	2023-01-03	90/18903	0.0142163	0.0341369	0.00530167	SLC4A4	1	Gallbladder
GO:0001656	BP	metanephros development	2023-01-03	92/18903	0.0145307	0.0341369	0.00530167	GPC3	1	Gallbladder
GO:0046031	BP	ADP metabolic process	2023-01-03	92/18903	0.0145307	0.0341369	0.00530167	SLC4A4	1	Gallbladder
GO:1900542	BP	regulation of purine nucleotide metabolic process	2023-01-03	94/18903	0.014845	0.0341369	0.00530167	SLC4A4	1	Gallbladder
GO:0001738	BP	morphogenesis of a polarized epithelium	2023-01-03	96/18903	0.0151592	0.0341369	0.00530167	GPC3	1	Gallbladder
GO:0009798	BP	axis specification	2023-01-03	96/18903	0.0151592	0.0341369	0.00530167	GPC3	1	Gallbladder
GO:0045807	BP	positive regulation of endocytosis	2023-01-03	96/18903	0.0151592	0.0341369	0.00530167	GPC3	1	Gallbladder
GO:0072080	BP	nephron tubule development	2023-01-03	96/18903	0.0151592	0.0341369	0.00530167	GPC3	1	Gallbladder
GO:0001657	BP	ureteric bud development	2023-01-03	97/18903	0.0153163	0.0341369	0.00530167	GPC3	1	Gallbladder
GO:0060993	BP	kidney morphogenesis	2023-01-03	97/18903	0.0153163	0.0341369	0.00530167	GPC3	1	Gallbladder
GO:0072163	BP	mesonephric epithelium development	2023-01-03	98/18903	0.0154734	0.0341369	0.00530167	GPC3	1	Gallbladder
GO:0072164	BP	mesonephric tubule development	2023-01-03	98/18903	0.0154734	0.0341369	0.00530167	GPC3	1	Gallbladder
GO:0006140	BP	regulation of nucleotide metabolic process	2023-01-03	99/18903	0.0156305	0.0341369	0.00530167	SLC4A4	1	Gallbladder
GO:0006885	BP	regulation of pH	2023-01-03	99/18903	0.0156305	0.0341369	0.00530167	SLC4A4	1	Gallbladder
GO:0061326	BP	renal tubule development	2023-01-03	99/18903	0.0156305	0.0341369	0.00530167	GPC3	1	Gallbladder
GO:0006165	BP	nucleoside diphosphate phosphorylation	2023-01-03	100/18903	0.0157875	0.0341369	0.00530167	SLC4A4	1	Gallbladder
GO:0030316	BP	osteoclast differentiation	2023-01-03	100/18903	0.0157875	0.0341369	0.00530167	GPC3	1	Gallbladder
GO:0001823	BP	mesonephros development	2023-01-03	102/18903	0.0161016	0.0341369	0.00530167	GPC3	1	Gallbladder
GO:0046939	BP	nucleotide phosphorylation	2023-01-03	102/18903	0.0161016	0.0341369	0.00530167	SLC4A4	1	Gallbladder
GO:0009135	BP	purine nucleoside diphosphate metabolic process	2023-01-03	104/18903	0.0164155	0.0341369	0.00530167	SLC4A4	1	Gallbladder
GO:0009179	BP	purine ribonucleoside diphosphate metabolic process	2023-01-03	104/18903	0.0164155	0.0341369	0.00530167	SLC4A4	1	Gallbladder
GO:0022600	BP	digestive system process	2023-01-03	106/18903	0.0167294	0.0342739	0.00532295	SLC5A1	1	Gallbladder
GO:0006090	BP	pyruvate metabolic process	2023-01-03	108/18903	0.0170433	0.0342739	0.00532295	SLC4A4	1	Gallbladder
GO:0090263	BP	positive regulation of canonical Wnt signaling pathway	2023-01-03	108/18903	0.0170433	0.0342739	0.00532295	GPC3	1	Gallbladder
GO:0030510	BP	regulation of BMP signaling pathway	2023-01-03	111/18903	0.0175139	0.0348375	0.00541048	GPC3	1	Gallbladder
GO:0009185	BP	ribonucleoside diphosphate metabolic process	2023-01-03	114/18903	0.0179844	0.0350122	0.00543762	SLC4A4	1	Gallbladder
GO:0030004	BP	cellular monovalent inorganic cation homeostasis	2023-01-03	114/18903	0.0179844	0.0350122	0.00543762	SLC4A4	1	Gallbladder
GO:0072009	BP	nephron epithelium development	2023-01-03	116/18903	0.018298	0.0351124	0.00545318	GPC3	1	Gallbladder
GO:0030326	BP	embryonic limb morphogenesis	2023-01-03	118/18903	0.0186115	0.0351124	0.00545318	GPC3	1	Gallbladder
GO:0035113	BP	embryonic appendage morphogenesis	2023-01-03	118/18903	0.0186115	0.0351124	0.00545318	GPC3	1	Gallbladder
GO:0090100	BP	positive regulation of transmembrane receptor protein serine/threonine kinase signaling pathway	2023-01-03	121/18903	0.0190816	0.035632	0.00553388	GPC3	1	Gallbladder
GO:0030282	BP	bone mineralization	2023-01-03	123/18903	0.019395	0.0356399	0.0055351	GPC3	1	Gallbladder
GO:0003014	BP	renal system process	2023-01-03	125/18903	0.0197083	0.0356399	0.0055351	SLC5A1	1	Gallbladder
GO:0098659	BP	inorganic cation import across plasma membrane	2023-01-03	126/18903	0.0198649	0.0356399	0.0055351	SLC5A1	1	Gallbladder
GO:0099587	BP	inorganic ion import across plasma membrane	2023-01-03	126/18903	0.0198649	0.0356399	0.0055351	SLC5A1	1	Gallbladder
GO:2000027	BP	regulation of animal organ morphogenesis	2023-01-03	129/18903	0.0203346	0.0361285	0.00561098	GPC3	1	Gallbladder
GO:0009132	BP	nucleoside diphosphate metabolic process	2023-01-03	132/18903	0.0208042	0.0366074	0.00568536	SLC4A4	1	Gallbladder
GO:0043467	BP	regulation of generation of precursor metabolites and energy	2023-01-03	134/18903	0.0211172	0.0368042	0.00571593	SLC4A4	1	Gallbladder
GO:0007586	BP	digestion	2023-01-03	139/18903	0.0218993	0.0373931	0.00580738	SLC5A1	1	Gallbladder
GO:0090090	BP	negative regulation of canonical Wnt signaling pathway	2023-01-03	141/18903	0.0222121	0.0373931	0.00580738	GPC3	1	Gallbladder
GO:0035107	BP	appendage morphogenesis	2023-01-03	142/18903	0.0223684	0.0373931	0.00580738	GPC3	1	Gallbladder
GO:0035108	BP	limb morphogenesis	2023-01-03	142/18903	0.0223684	0.0373931	0.00580738	GPC3	1	Gallbladder
GO:0007224	BP	smoothened signaling pathway	2023-01-03	144/18903	0.0226811	0.0373931	0.00580738	GPC3	1	Gallbladder
GO:0030177	BP	positive regulation of Wnt signaling pathway	2023-01-03	144/18903	0.0226811	0.0373931	0.00580738	GPC3	1	Gallbladder
GO:0072073	BP	kidney epithelium development	2023-01-03	146/18903	0.0229936	0.0375699	0.00583485	GPC3	1	Gallbladder
GO:0062013	BP	positive regulation of small molecule metabolic process	2023-01-03	152/18903	0.023931	0.0384155	0.00596617	SLC4A4	1	Gallbladder
GO:0072006	BP	nephron development	2023-01-03	152/18903	0.023931	0.0384155	0.00596617	GPC3	1	Gallbladder
GO:0016052	BP	carbohydrate catabolic process	2023-01-03	155/18903	0.0243994	0.0388269	0.00603006	SLC4A4	1	Gallbladder
GO:0048754	BP	branching morphogenesis of an epithelial tube	2023-01-03	157/18903	0.0247116	0.0389847	0.00605457	GPC3	1	Gallbladder
GO:0055067	BP	monovalent inorganic cation homeostasis	2023-01-03	164/18903	0.0258038	0.0403598	0.00626813	SLC4A4	1	Gallbladder
GO:0030509	BP	BMP signaling pathway	2023-01-03	167/18903	0.0262716	0.040646	0.00631258	GPC3	1	Gallbladder
GO:1905475	BP	regulation of protein localization to membrane	2023-01-03	172/18903	0.027051	0.040646	0.00631258	GPC3	1	Gallbladder
GO:0030178	BP	negative regulation of Wnt signaling pathway	2023-01-03	174/18903	0.0273627	0.040646	0.00631258	GPC3	1	Gallbladder
GO:0031214	BP	biomineral tissue development	2023-01-03	174/18903	0.0273627	0.040646	0.00631258	GPC3	1	Gallbladder
GO:0050680	BP	negative regulation of epithelial cell proliferation	2023-01-03	176/18903	0.0276743	0.040646	0.00631258	GPC3	1	Gallbladder
GO:0048736	BP	appendage development	2023-01-03	178/18903	0.0279858	0.040646	0.00631258	GPC3	1	Gallbladder
GO:0060173	BP	limb development	2023-01-03	178/18903	0.0279858	0.040646	0.00631258	GPC3	1	Gallbladder
GO:0071772	BP	response to BMP	2023-01-03	178/18903	0.0279858	0.040646	0.00631258	GPC3	1	Gallbladder
GO:0071773	BP	cellular response to BMP stimulus	2023-01-03	178/18903	0.0279858	0.040646	0.00631258	GPC3	1	Gallbladder
GO:0110148	BP	biomineralization	2023-01-03	181/18903	0.0284529	0.0409991	0.00636742	GPC3	1	Gallbladder
GO:0006109	BP	regulation of carbohydrate metabolic process	2023-01-03	186/18903	0.0292311	0.041269	0.00640934	SLC4A4	1	Gallbladder
GO:0015698	BP	inorganic anion transport	2023-01-03	186/18903	0.0292311	0.041269	0.00640934	SLC4A4	1	Gallbladder
GO:0030324	BP	lung development	2023-01-03	187/18903	0.0293867	0.041269	0.00640934	GPC3	1	Gallbladder
GO:0061138	BP	morphogenesis of a branching epithelium	2023-01-03	188/18903	0.0295423	0.041269	0.00640934	GPC3	1	Gallbladder
GO:0030323	BP	respiratory tube development	2023-01-03	191/18903	0.030009	0.0416033	0.00646126	GPC3	1	Gallbladder
GO:0007369	BP	gastrulation	2023-01-03	196/18903	0.0307864	0.0423602	0.0065788	GPC3	1	Gallbladder
GO:0098739	BP	import across plasma membrane	2023-01-03	202/18903	0.0317187	0.043207	0.00671032	SLC5A1	1	Gallbladder
GO:0001763	BP	morphogenesis of a branching structure	2023-01-03	203/18903	0.031874	0.043207	0.00671032	GPC3	1	Gallbladder
GO:0030100	BP	regulation of endocytosis	2023-01-03	209/18903	0.0328057	0.0438207	0.00680563	GPC3	1	Gallbladder
GO:0045732	BP	positive regulation of protein catabolic process	2023-01-03	209/18903	0.0328057	0.0438207	0.00680563	GPC3	1	Gallbladder
GO:0060541	BP	respiratory system development	2023-01-03	211/18903	0.0331161	0.0439148	0.00682025	GPC3	1	Gallbladder
GO:0046034	BP	ATP metabolic process	2023-01-03	217/18903	0.0340469	0.0443898	0.00689402	SLC4A4	1	Gallbladder
GO:0002573	BP	myeloid leukocyte differentiation	2023-01-03	218/18903	0.034202	0.0443898	0.00689402	GPC3	1	Gallbladder
GO:0009952	BP	anterior/posterior pattern specification	2023-01-03	218/18903	0.034202	0.0443898	0.00689402	GPC3	1	Gallbladder
GO:0034764	BP	positive regulation of transmembrane transport	2023-01-03	237/18903	0.0371454	0.0478705	0.00743459	GPC3	1	Gallbladder
GO:0009205	BP	purine ribonucleoside triphosphate metabolic process	2023-01-03	242/18903	0.037919	0.0485257	0.00753635	SLC4A4	1	Gallbladder
GO:0009144	BP	purine nucleoside triphosphate metabolic process	2023-01-03	247/18903	0.0386922	0.0488852	0.00759218	SLC4A4	1	Gallbladder
GO:0009199	BP	ribonucleoside triphosphate metabolic process	2023-01-03	249/18903	0.0390013	0.0488852	0.00759218	SLC4A4	1	Gallbladder
GO:0045926	BP	negative regulation of growth	2023-01-03	249/18903	0.0390013	0.0488852	0.00759218	GPC3	1	Gallbladder
GO:0098657	BP	import into cell	2023-01-03	252/18903	0.0394649	0.0491298	0.00763017	SLC5A1	1	Gallbladder
GO:0044214	CC	spanning component of plasma membrane	2023-01-03	18/19869	0.00271548	0.0358166	0.00992149	SLC4A4	1	Gallbladder
GO:0089717	CC	spanning component of membrane	2023-01-03	25/19869	0.00377017	0.0358166	0.00992149	SLC4A4	1	Gallbladder
GO:0031526	CC	brush border membrane	2023-01-03	57/19869	0.00858214	0.0432125	0.0119702	SLC5A1	1	Gallbladder
GO:0046658	CC	anchored component of plasma membrane	2023-01-03	62/19869	0.0093326	0.0432125	0.0119702	GPC3	1	Gallbladder
GO:0043202	CC	lysosomal lumen	2023-01-03	98/19869	0.0147248	0.0432125	0.0119702	GPC3	1	Gallbladder
GO:0005903	CC	brush border	2023-01-03	102/19869	0.0153227	0.0432125	0.0119702	SLC5A1	1	Gallbladder
GO:0005796	CC	Golgi lumen	2023-01-03	106/19869	0.0159204	0.0432125	0.0119702	GPC3	1	Gallbladder
GO:0015370	MF	solute:sodium symporter activity	2023-02-03	76/18432	5.02008e-05	0.00145582	5.2843e-05	SLC4A4/SLC5A1	2	Gallbladder
GO:0015294	MF	solute:cation symporter activity	2023-02-03	109/18432	0.000103554	0.00150153	5.4502e-05	SLC4A4/SLC5A1	2	Gallbladder
GO:0015293	MF	symporter activity	2023-02-03	145/18432	0.000183433	0.00153946	5.58787e-05	SLC4A4/SLC5A1	2	Gallbladder
GO:0015081	MF	sodium ion transmembrane transporter activity	2023-02-03	156/18432	0.000212339	0.00153946	5.58787e-05	SLC4A4/SLC5A1	2	Gallbladder
GO:0015291	MF	secondary active transmembrane transporter activity	2023-02-03	246/18432	0.000527535	0.0030597	0.00011106	SLC4A4/SLC5A1	2	Gallbladder
GO:0022853	MF	active ion transmembrane transporter activity	2023-02-03	278/18432	0.000673235	0.00325397	0.000118111	SLC4A4/SLC5A1	2	Gallbladder
GO:0022804	MF	active transmembrane transporter activity	2023-02-03	417/18432	0.0015089	0.00597601	0.000216915	SLC4A4/SLC5A1	2	Gallbladder
GO:0046873	MF	metal ion transmembrane transporter activity	2023-02-03	436/18432	0.00164856	0.00597601	0.000216915	SLC4A4/SLC5A1	2	Gallbladder
GO:0055056	MF	D-glucose transmembrane transporter activity	2023-01-03	12/18432	0.00195196	0.00613207	0.00022258	SLC5A1	1	Gallbladder
GO:0015166	MF	polyol transmembrane transporter activity	2023-01-03	13/18432	0.00211451	0.00613207	0.00022258	SLC5A1	1	Gallbladder
GO:0005402	MF	carbohydrate:cation symporter activity	2023-01-03	16/18432	0.00260205	0.00668094	0.000242502	SLC5A1	1	Gallbladder
GO:0005372	MF	water transmembrane transporter activity	2023-01-03	17/18432	0.00276453	0.00668094	0.000242502	SLC5A1	1	Gallbladder
GO:0005452	MF	solute:inorganic anion antiporter activity	2023-01-03	19/18432	0.00308943	0.0068918	0.000250156	SLC4A4	1	Gallbladder
GO:0015106	MF	bicarbonate transmembrane transporter activity	2023-01-03	22/18432	0.00357665	0.00707125	0.00025667	SLC4A4	1	Gallbladder
GO:0005355	MF	glucose transmembrane transporter activity	2023-01-03	24/18432	0.00390138	0.00707125	0.00025667	SLC5A1	1	Gallbladder
GO:0015149	MF	hexose transmembrane transporter activity	2023-01-03	24/18432	0.00390138	0.00707125	0.00025667	SLC5A1	1	Gallbladder
GO:0015145	MF	monosaccharide transmembrane transporter activity	2023-01-03	27/18432	0.00438833	0.00748598	0.000271724	SLC5A1	1	Gallbladder
GO:0051119	MF	sugar transmembrane transporter activity	2023-01-03	29/18432	0.00471288	0.00759298	0.000275607	SLC5A1	1	Gallbladder
GO:0140323	MF	solute:anion antiporter activity	2023-01-03	31/18432	0.00503736	0.00768861	0.000279078	SLC4A4	1	Gallbladder
GO:0015144	MF	carbohydrate transmembrane transporter activity	2023-01-03	43/18432	0.00698276	0.010125	0.000367514	SLC5A1	1	Gallbladder
GO:1901618	MF	organic hydroxy compound transmembrane transporter activity	2023-01-03	53/18432	0.00860199	0.0115523	0.000419321	SLC5A1	1	Gallbladder
GO:1901505	MF	carbohydrate derivative transmembrane transporter activity	2023-01-03	54/18432	0.00876381	0.0115523	0.000419321	SLC5A1	1	Gallbladder
GO:0015297	MF	antiporter activity	2023-01-03	93/18432	0.0150613	0.0189903	0.000689304	SLC4A4	1	Gallbladder
GO:0015103	MF	inorganic anion transmembrane transporter activity	2023-01-03	159/18432	0.0256577	0.031003	0.00112534	SLC4A4	1	Gallbladder
GO:0030414	MF	peptidase inhibitor activity	2023-01-03	187/18432	0.0301301	0.0341402	0.00123921	GPC3	1	Gallbladder
GO:0008514	MF	organic anion transmembrane transporter activity	2023-01-03	190/18432	0.0306084	0.0341402	0.00123921	SLC4A4	1	Gallbladder
GO:0061134	MF	peptidase regulator activity	2023-01-03	232/18432	0.0372891	0.0400513	0.00145377	GPC3	1	Gallbladder
GO:0060537	BP	muscle tissue development	15/68	422/18903	2.00693e-11	2.79403e-08	2.31941e-08	POPDC3/ALPK2/NEBL/MYOCD/MYL2/RYR2/SORBS2/RBFOX1/BCL9/PKP2/MYLK3/FHOD3/PDLIM5/CHD7/YY1	15	Heart
GO:0051146	BP	striated muscle cell differentiation	13/68	293/18903	3.34615e-11	2.79403e-08	2.31941e-08	POPDC3/ALPK2/NEBL/MYOCD/MYL2/SORBS2/OBSCN/BCL9/MYLK3/CDH2/FHOD3/PDLIM5/YY1	13	Heart
GO:0048738	BP	cardiac muscle tissue development	12/68	241/18903	5.43514e-11	3.02556e-08	2.51161e-08	ALPK2/NEBL/MYOCD/MYL2/RYR2/SORBS2/PKP2/MYLK3/FHOD3/PDLIM5/CHD7/YY1	12	Heart
GO:0014706	BP	striated muscle tissue development	12/68	257/18903	1.14462e-10	4.77877e-08	3.967e-08	ALPK2/NEBL/MYOCD/MYL2/RYR2/SORBS2/PKP2/MYLK3/FHOD3/PDLIM5/CHD7/YY1	12	Heart
[truncated: 1,158 more rows]

## Sheet: Table S8
Table S8.KEGG enrichment of housekeeping circRNA's parental genes
Pathway	Enrichment FDR	nGenes	Pathway Genes	Fold Enrichment	Genes
[truncated: 45 more rows]

## Sheet: Table S9
Table S9.The hub circRNAs in highly correlated module
[truncated: 1,378 more rows]

[truncated: 2 more sheets: Table S10, Table S11]
